# Supplementary material
Source: PubMed Central journal article supplement (PMC3466332)

## Supporting Information 2

# **Stereoselective Radical Amination of Electron-Deficient C(sp<sup>3</sup>)-H Bonds by Co(II)-Based Metalloradical Catalysis: Direct Synthesis of $\alpha$ -Amino Acid Derivatives via $\alpha$ -C-H Amination**

Hongjian Lu,<sup>†,‡</sup> Yang Hu,<sup>†</sup> Huiling Jiang,<sup>†</sup> Lukasz Wojtas,<sup>†</sup> X. Peter Zhang\*,<sup>†</sup>

<sup>†</sup>Department of Chemistry, University of South Florida, Tampa, Florida 33620-5250;

<sup>‡</sup> Institute of Chemistry and BioMedical Sciences, Nanjing University, Nanjing 210064, P. R. China

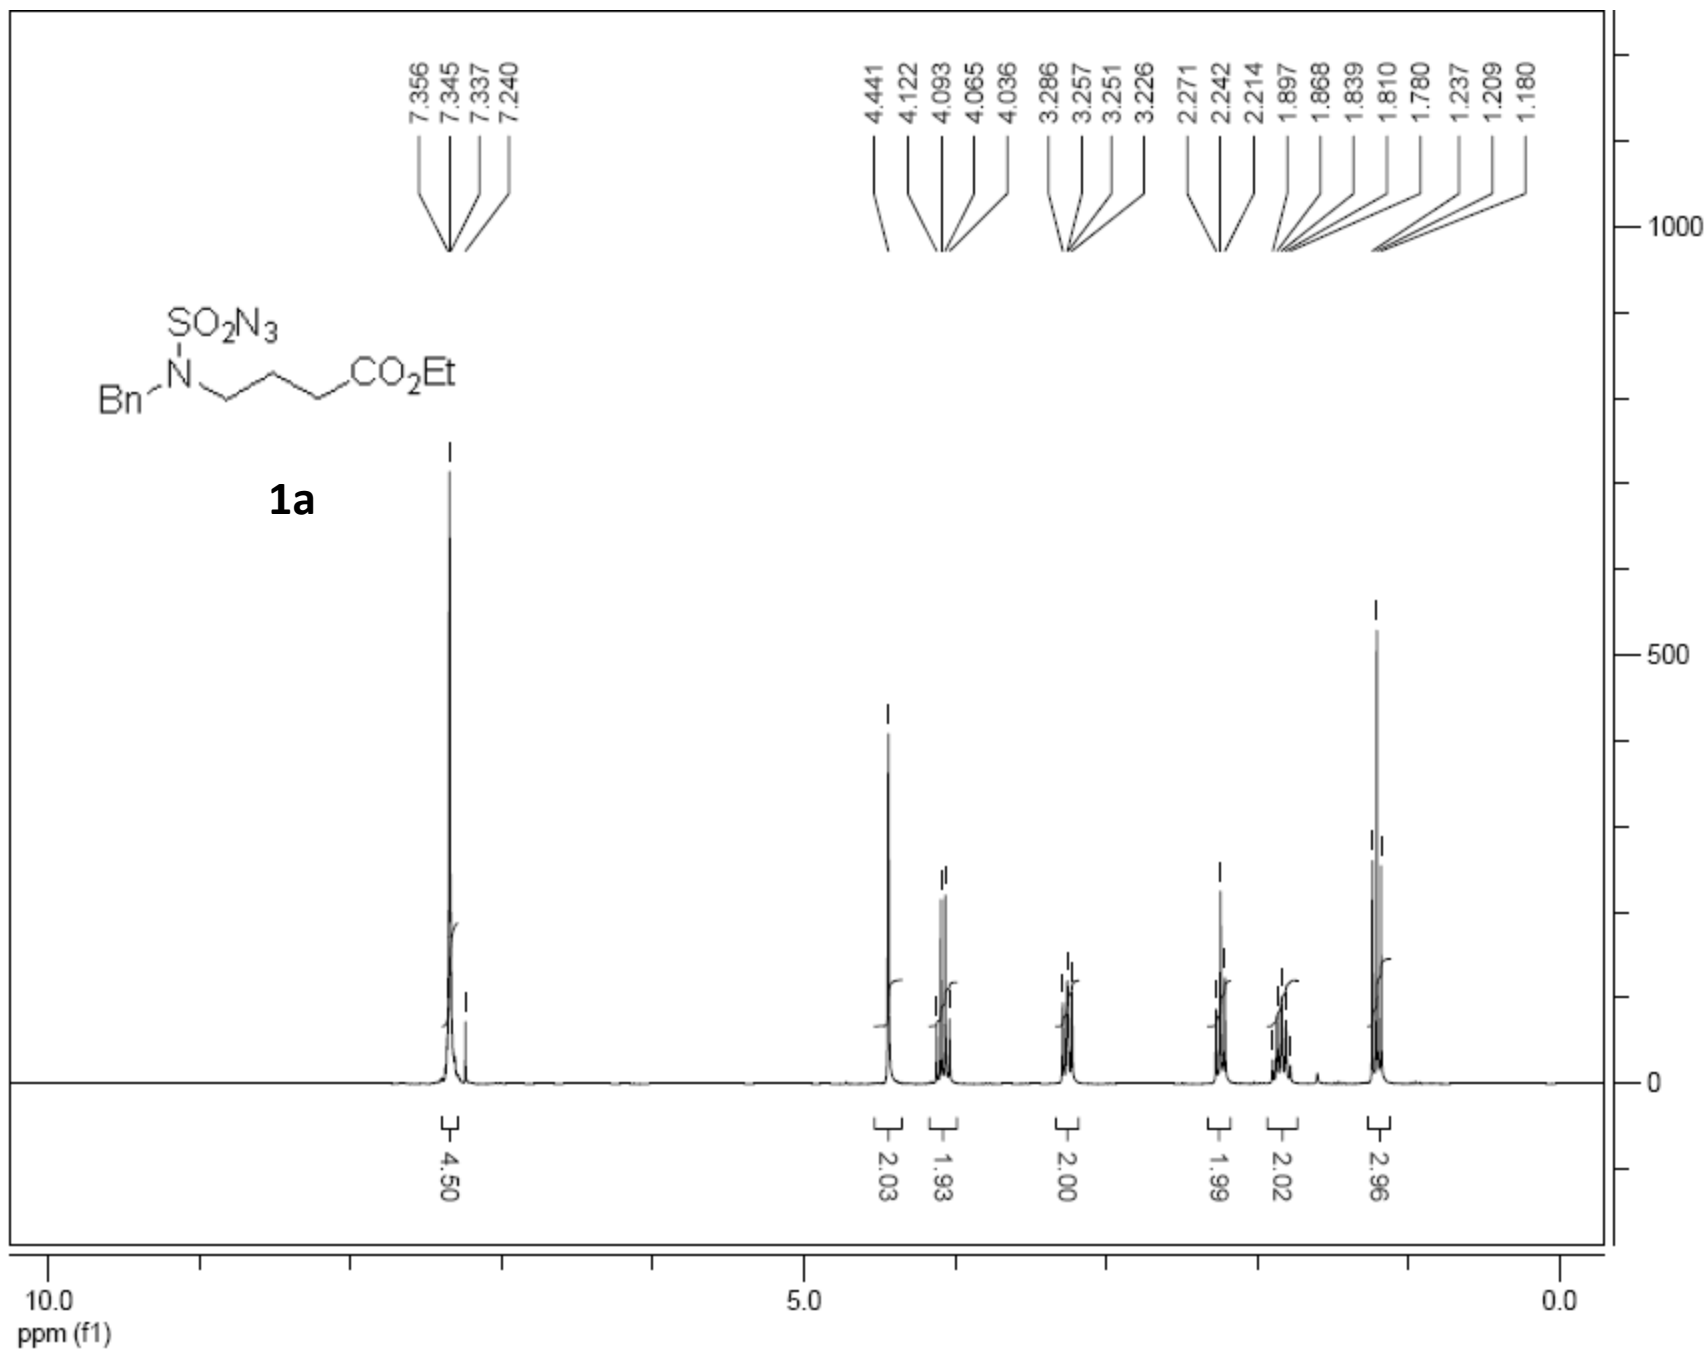

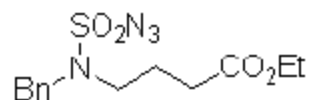

**1a**

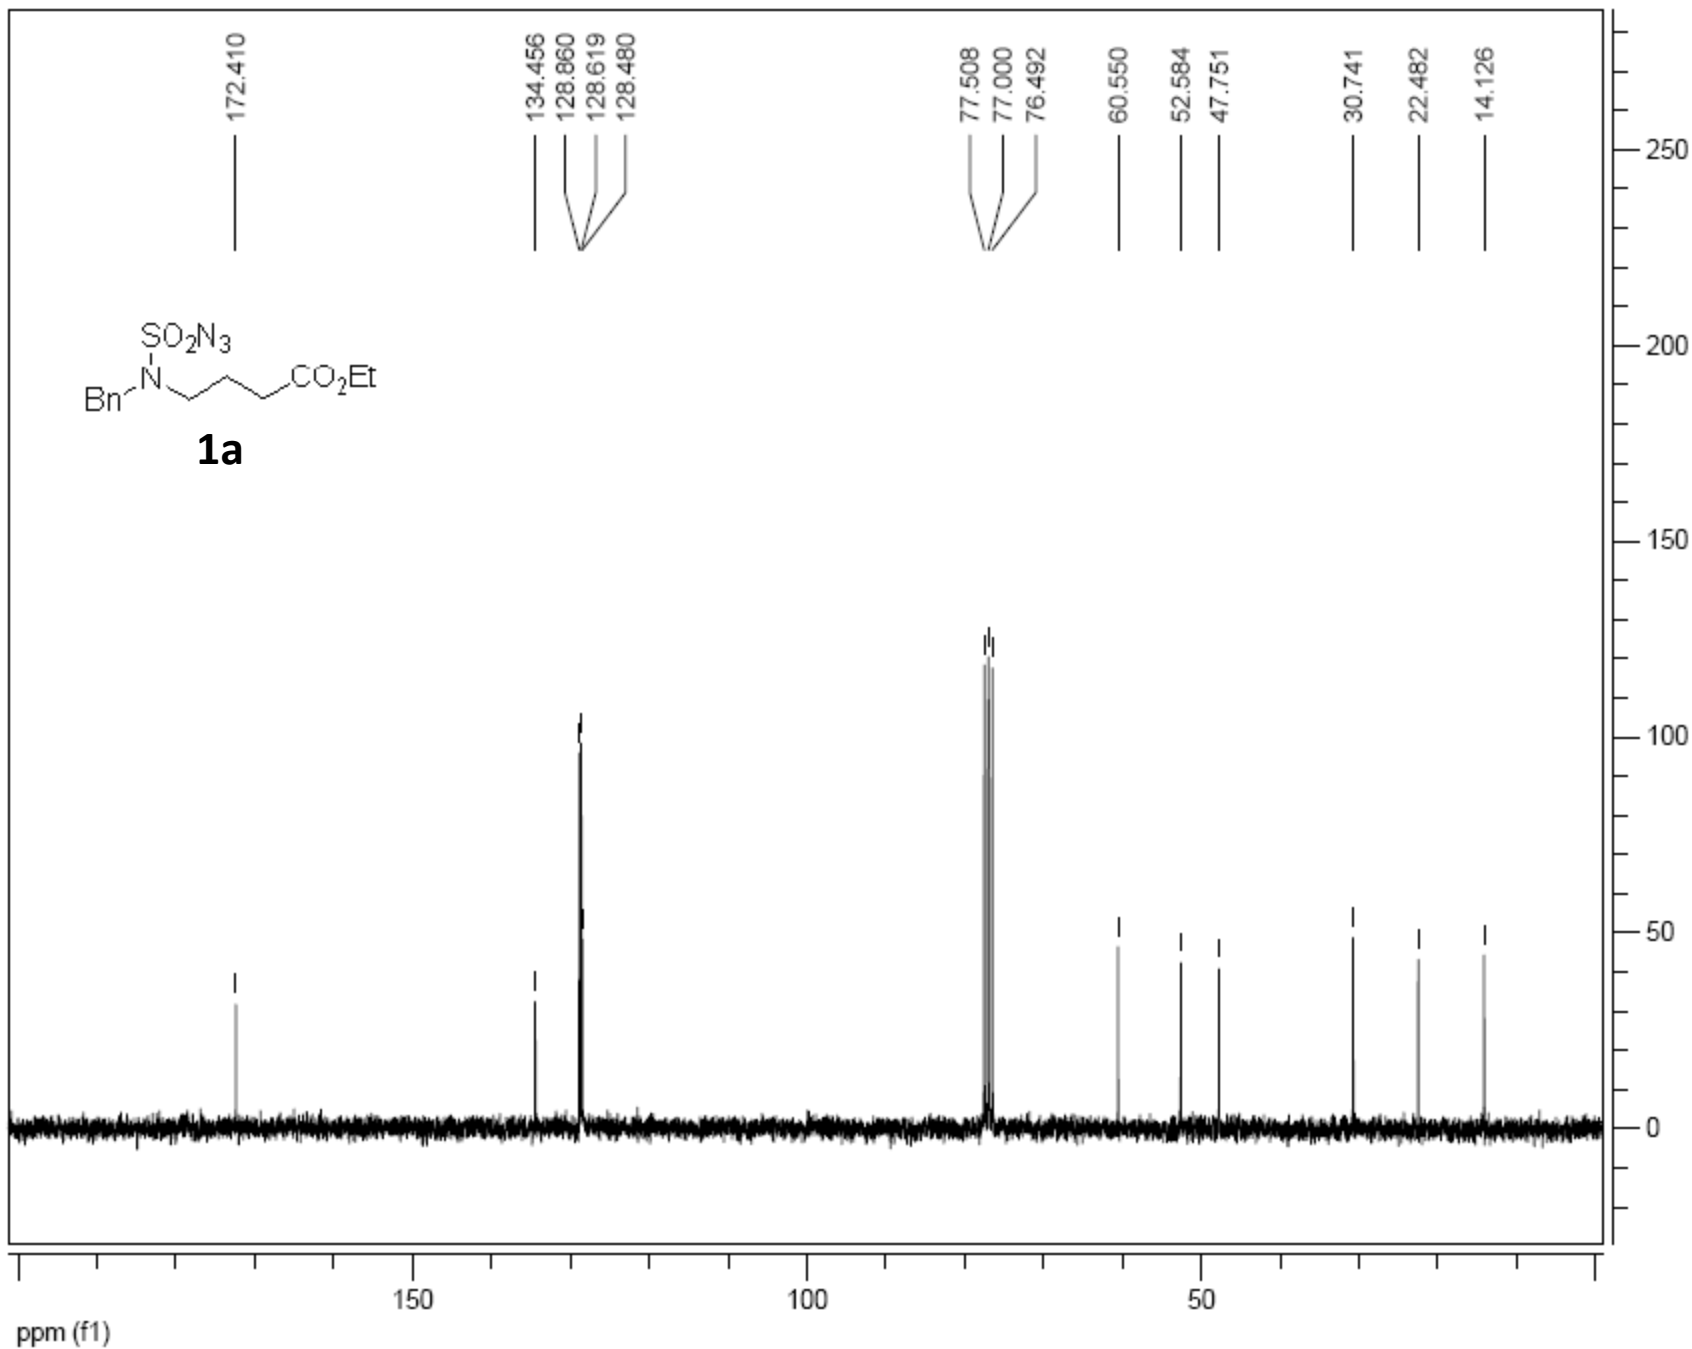

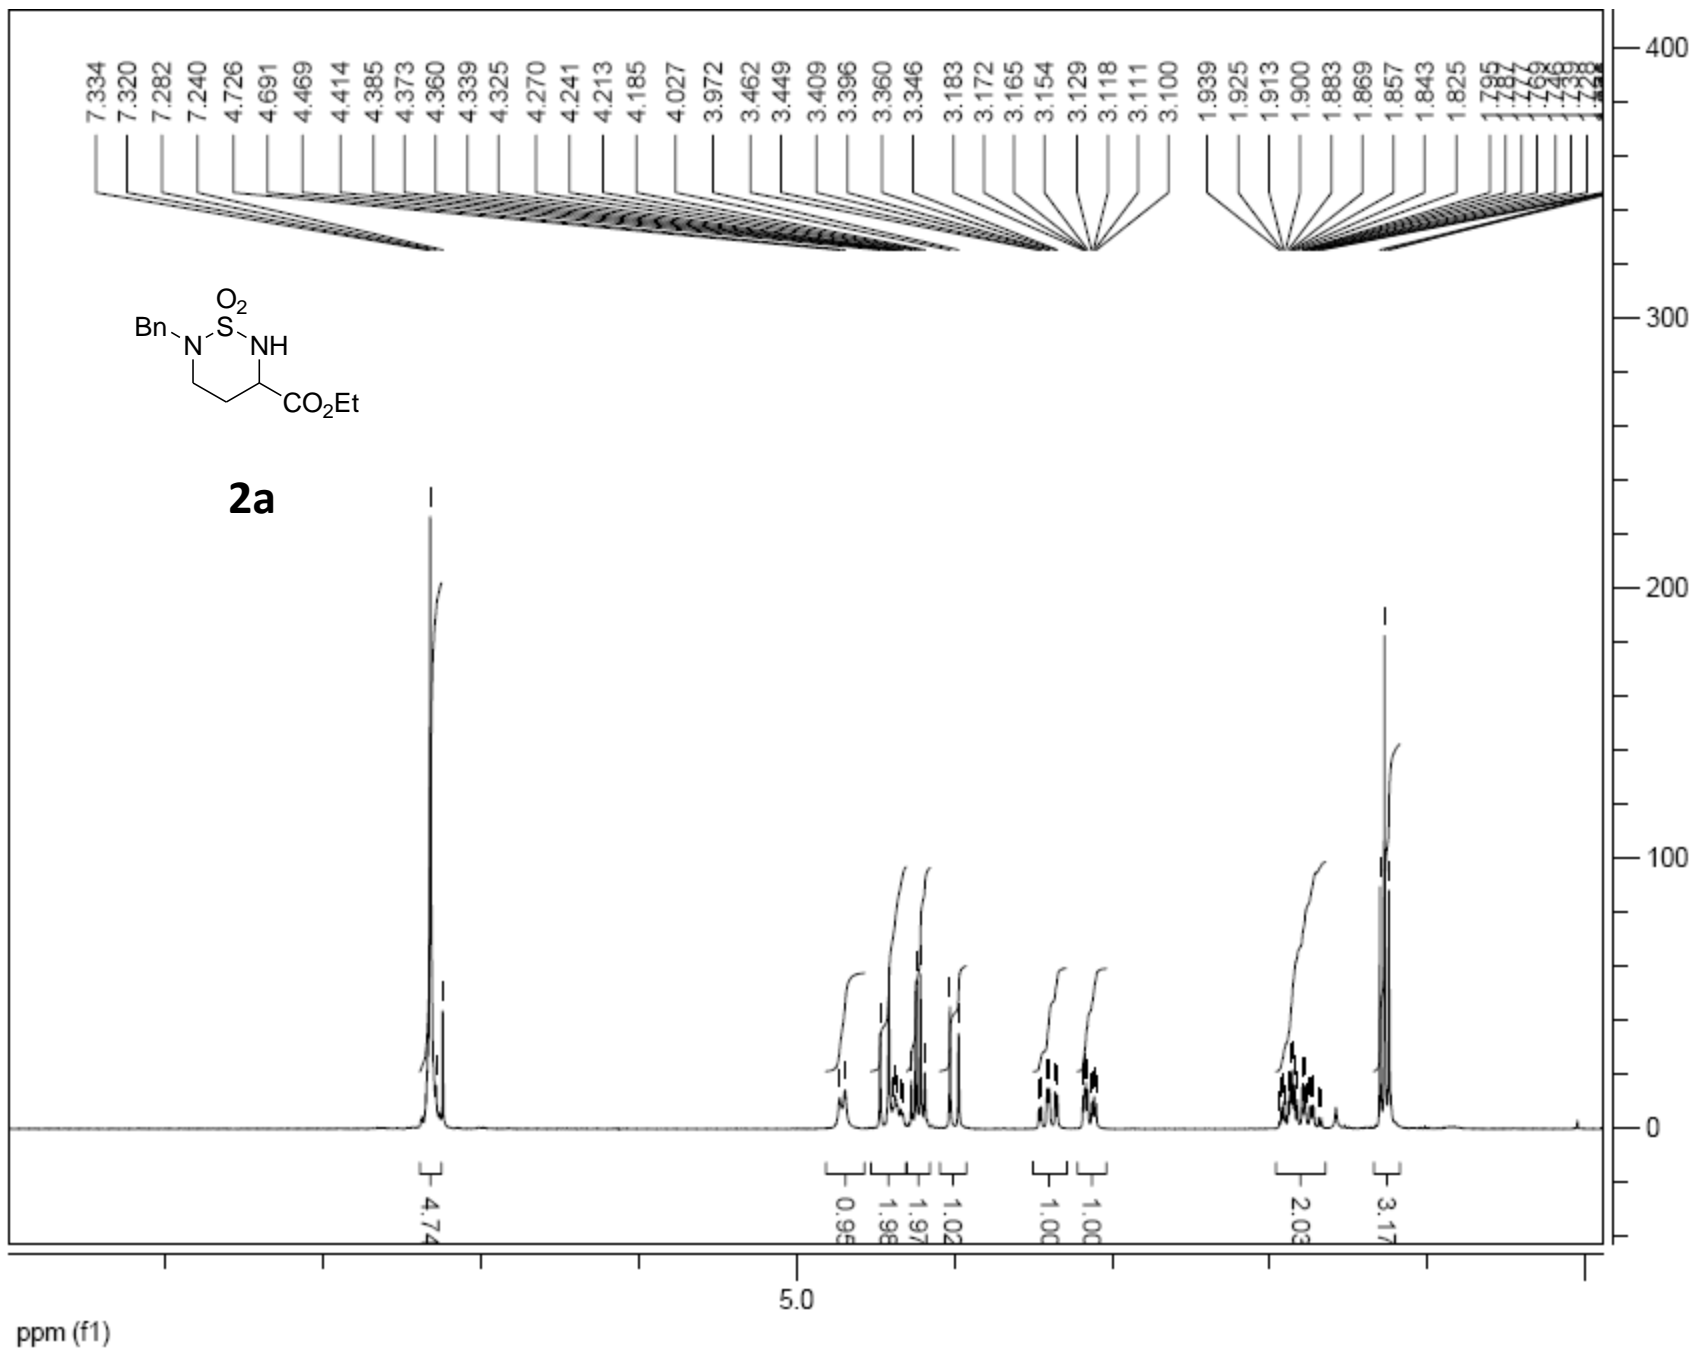

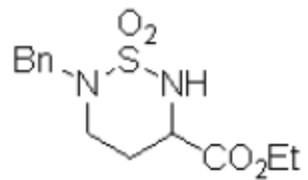

**2a**

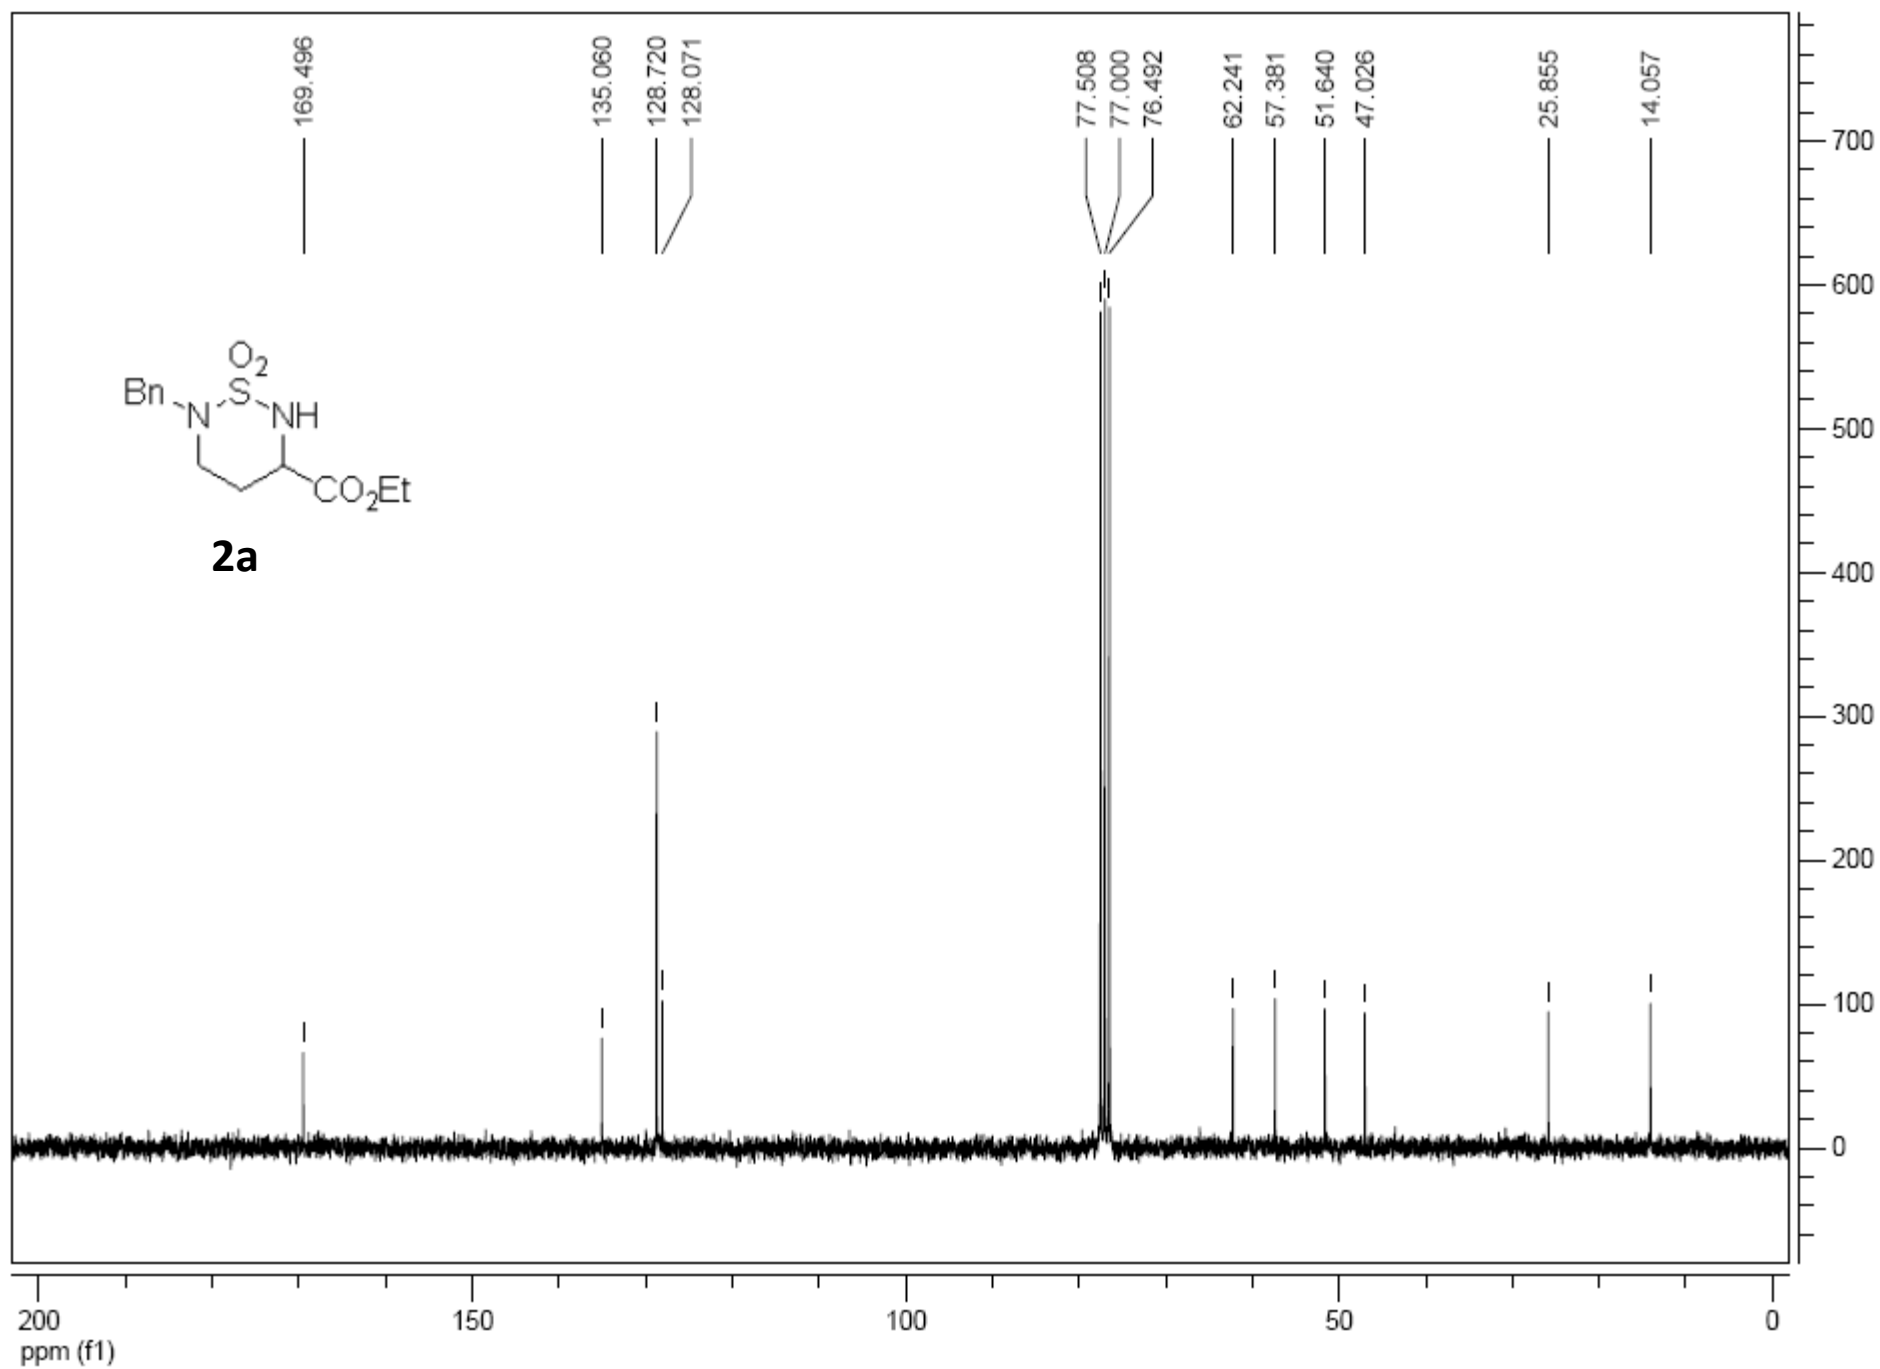

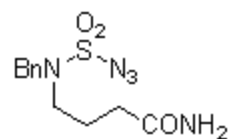

**1b**

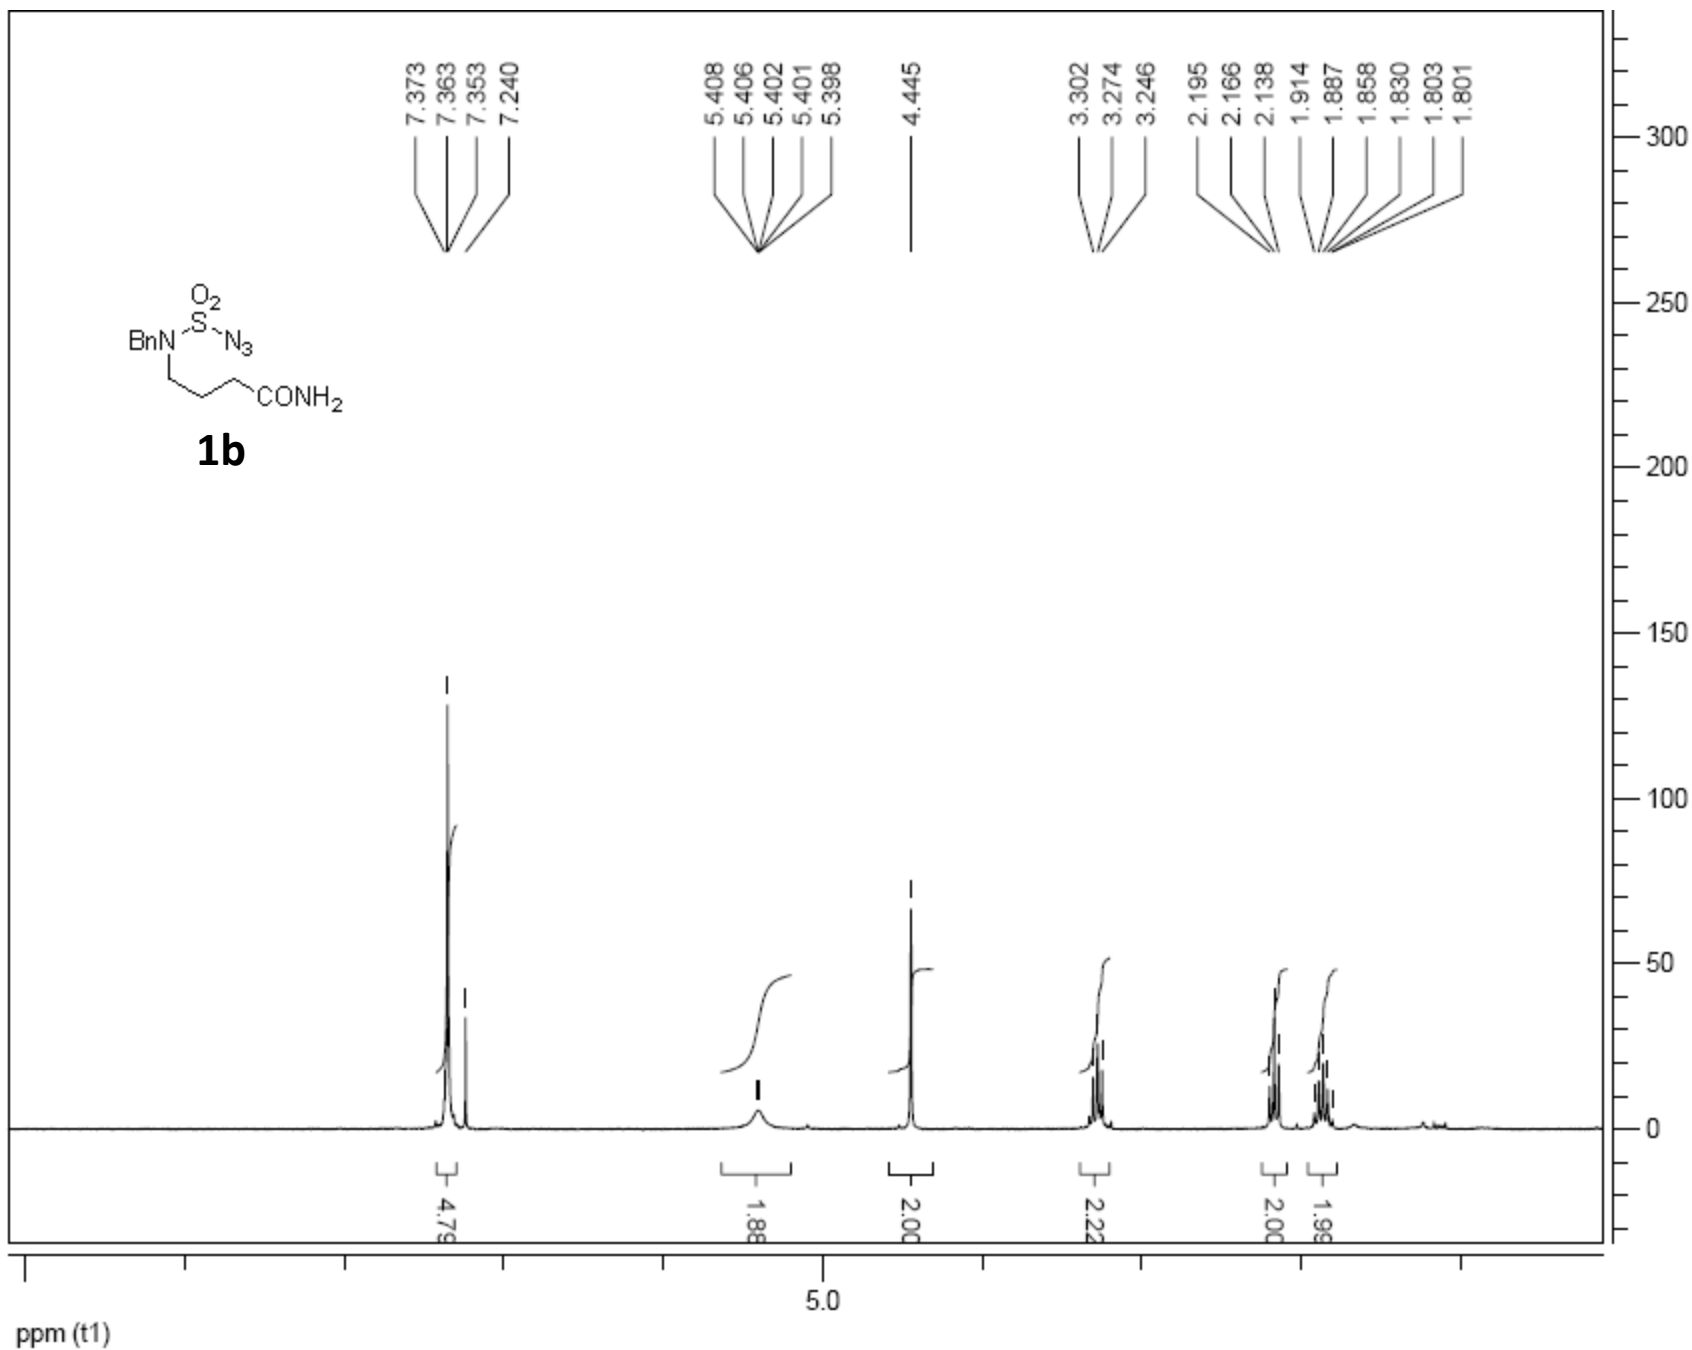

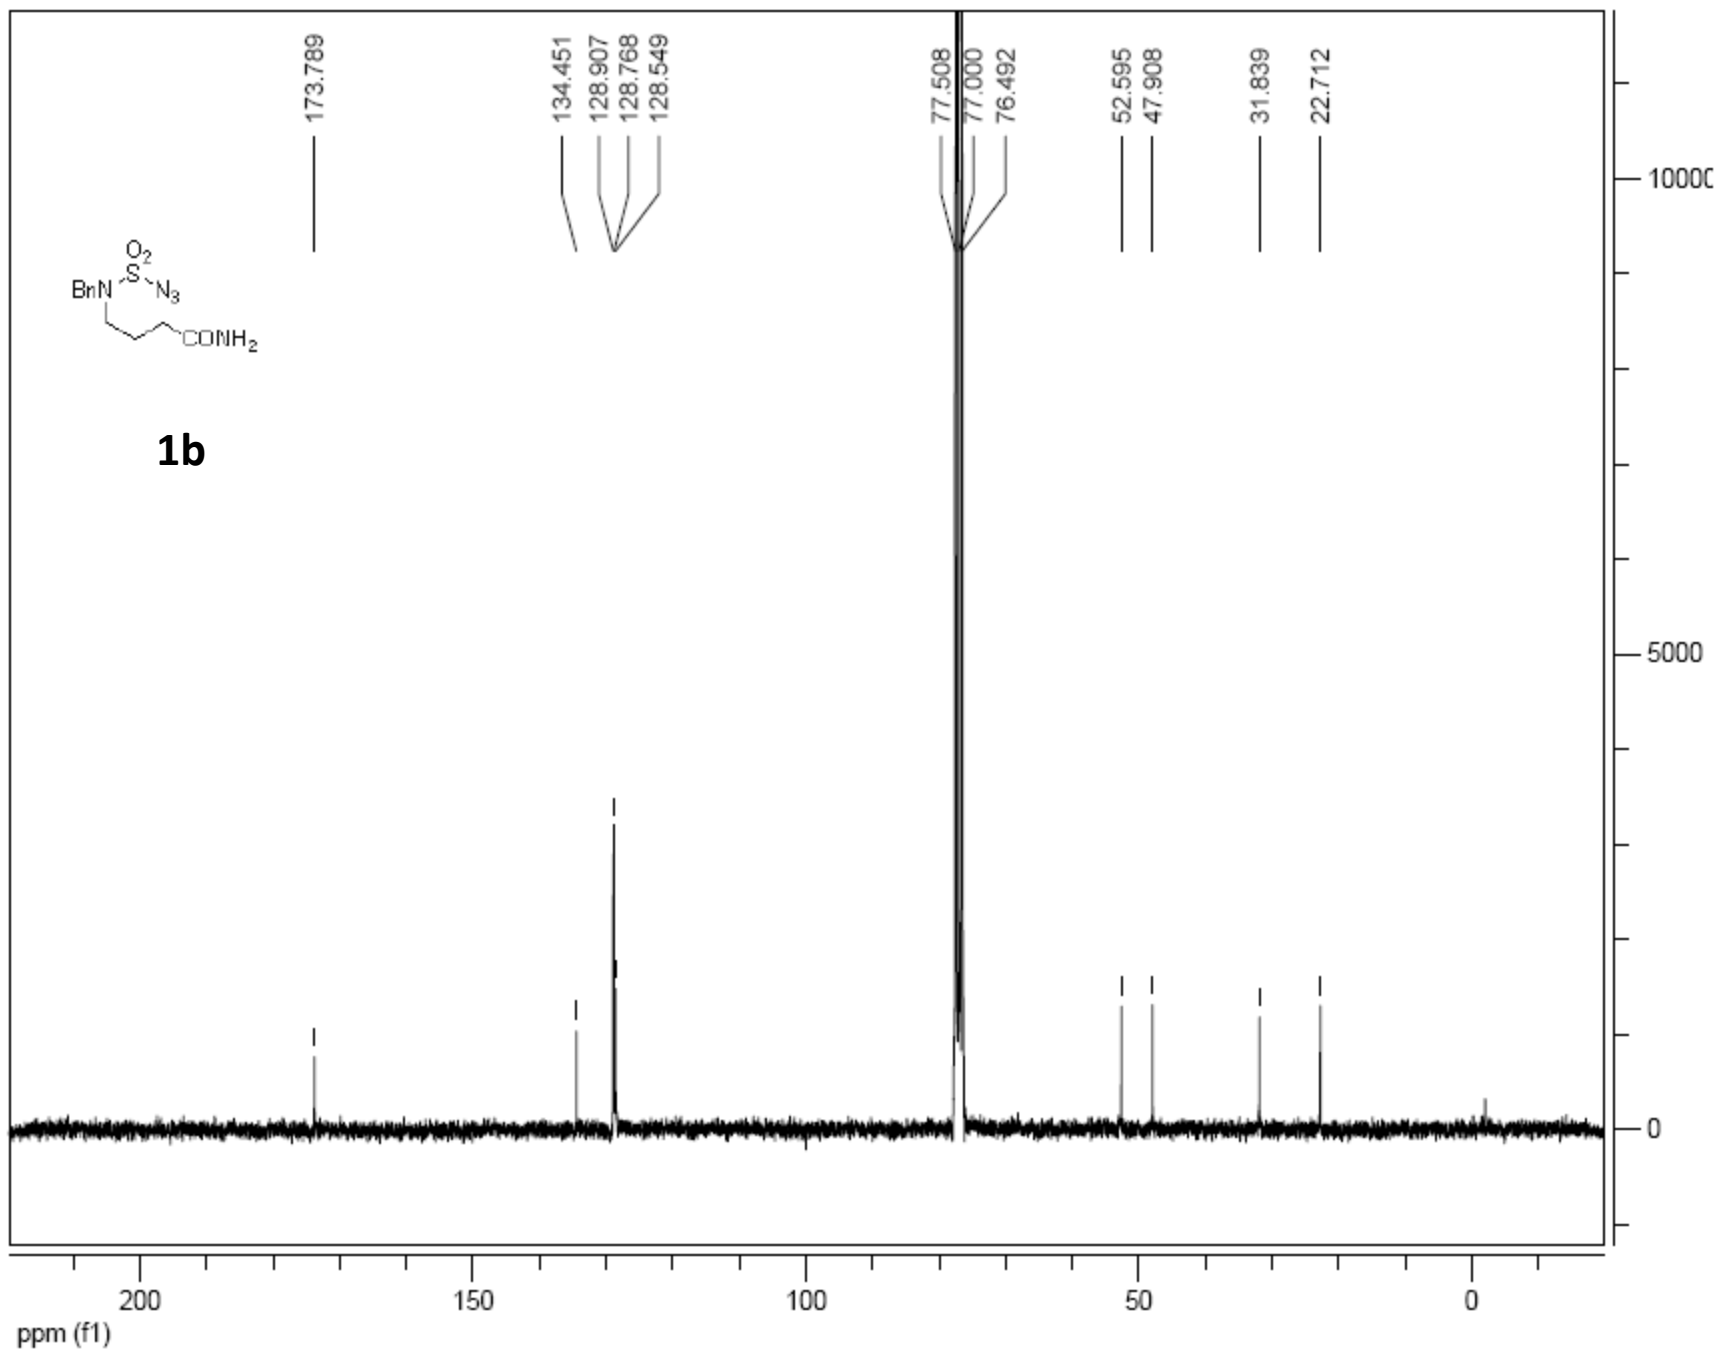

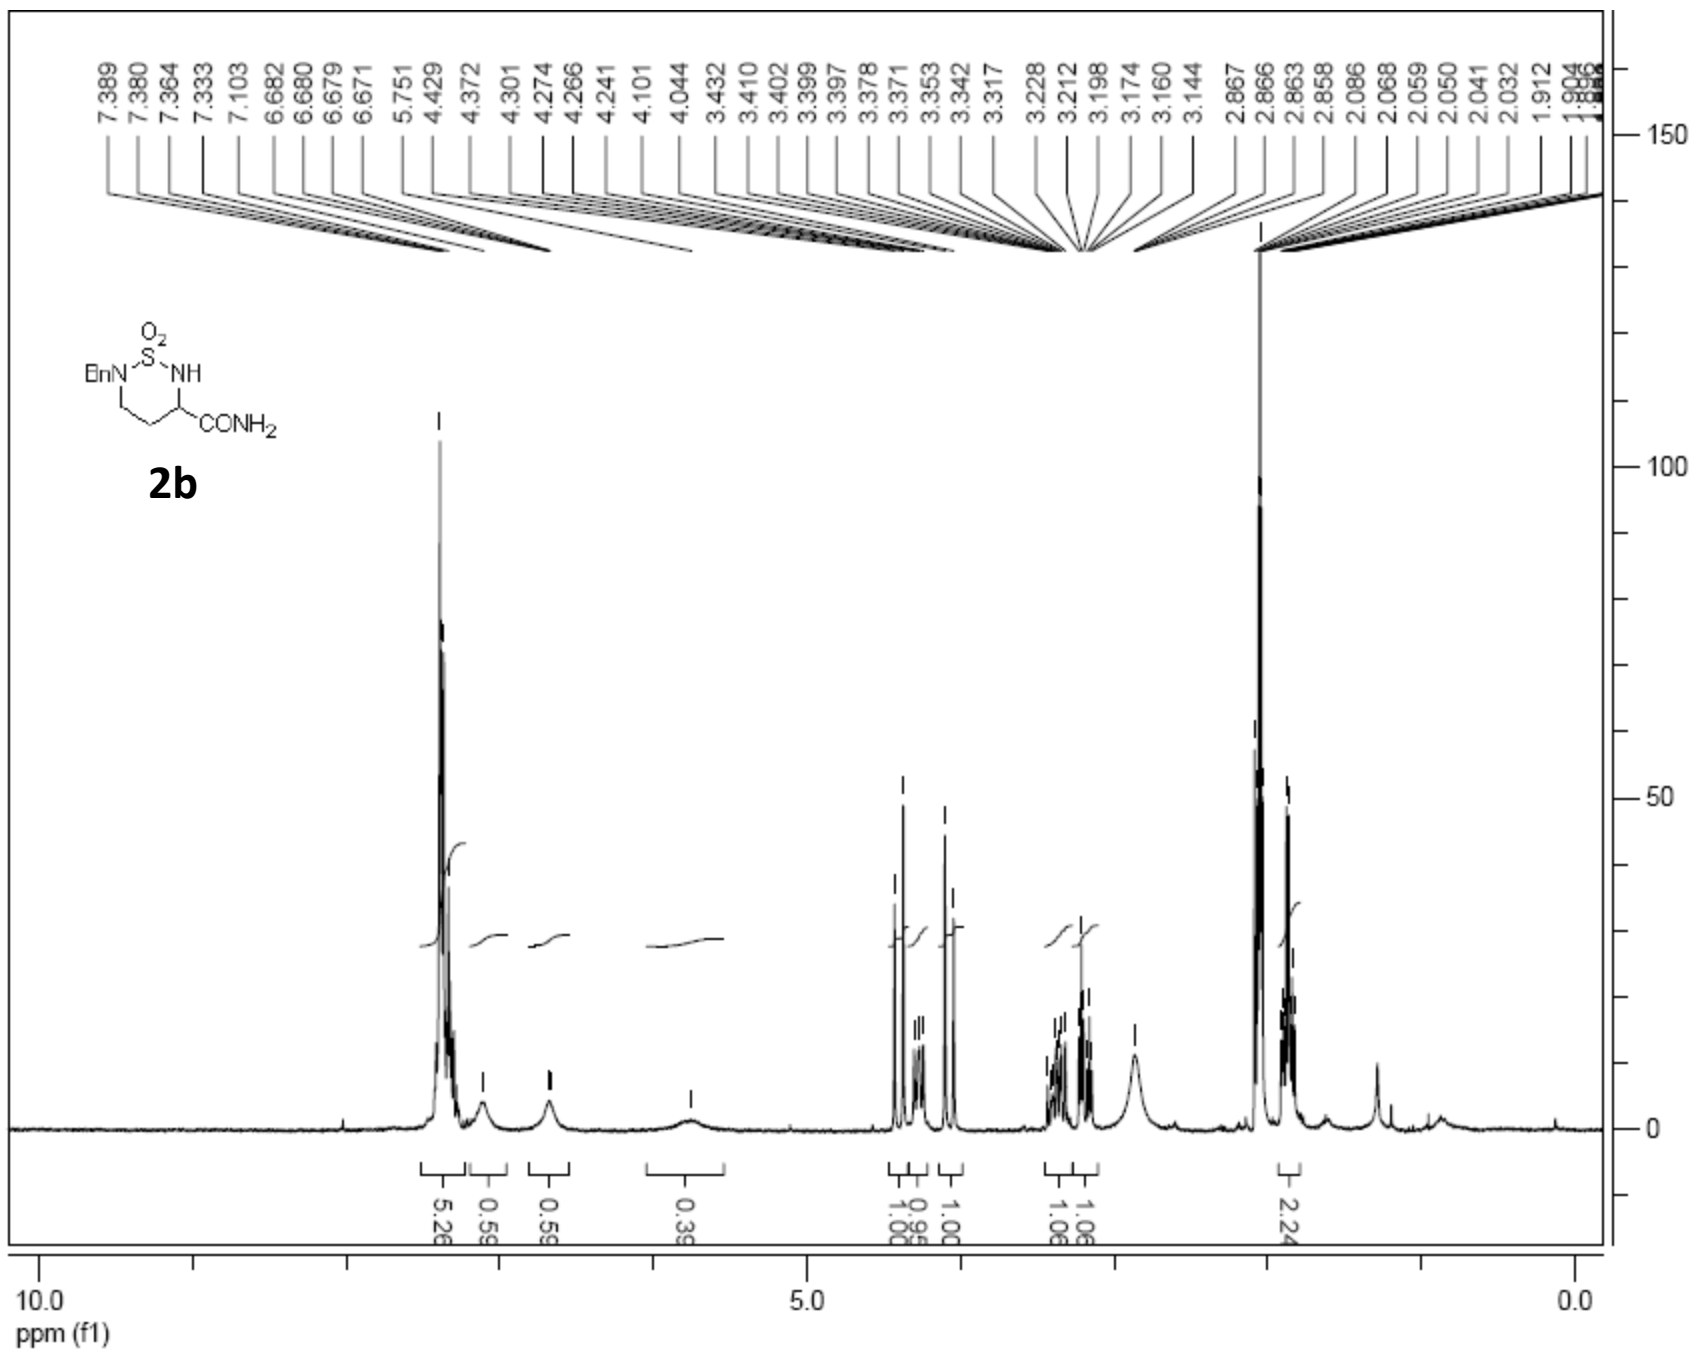



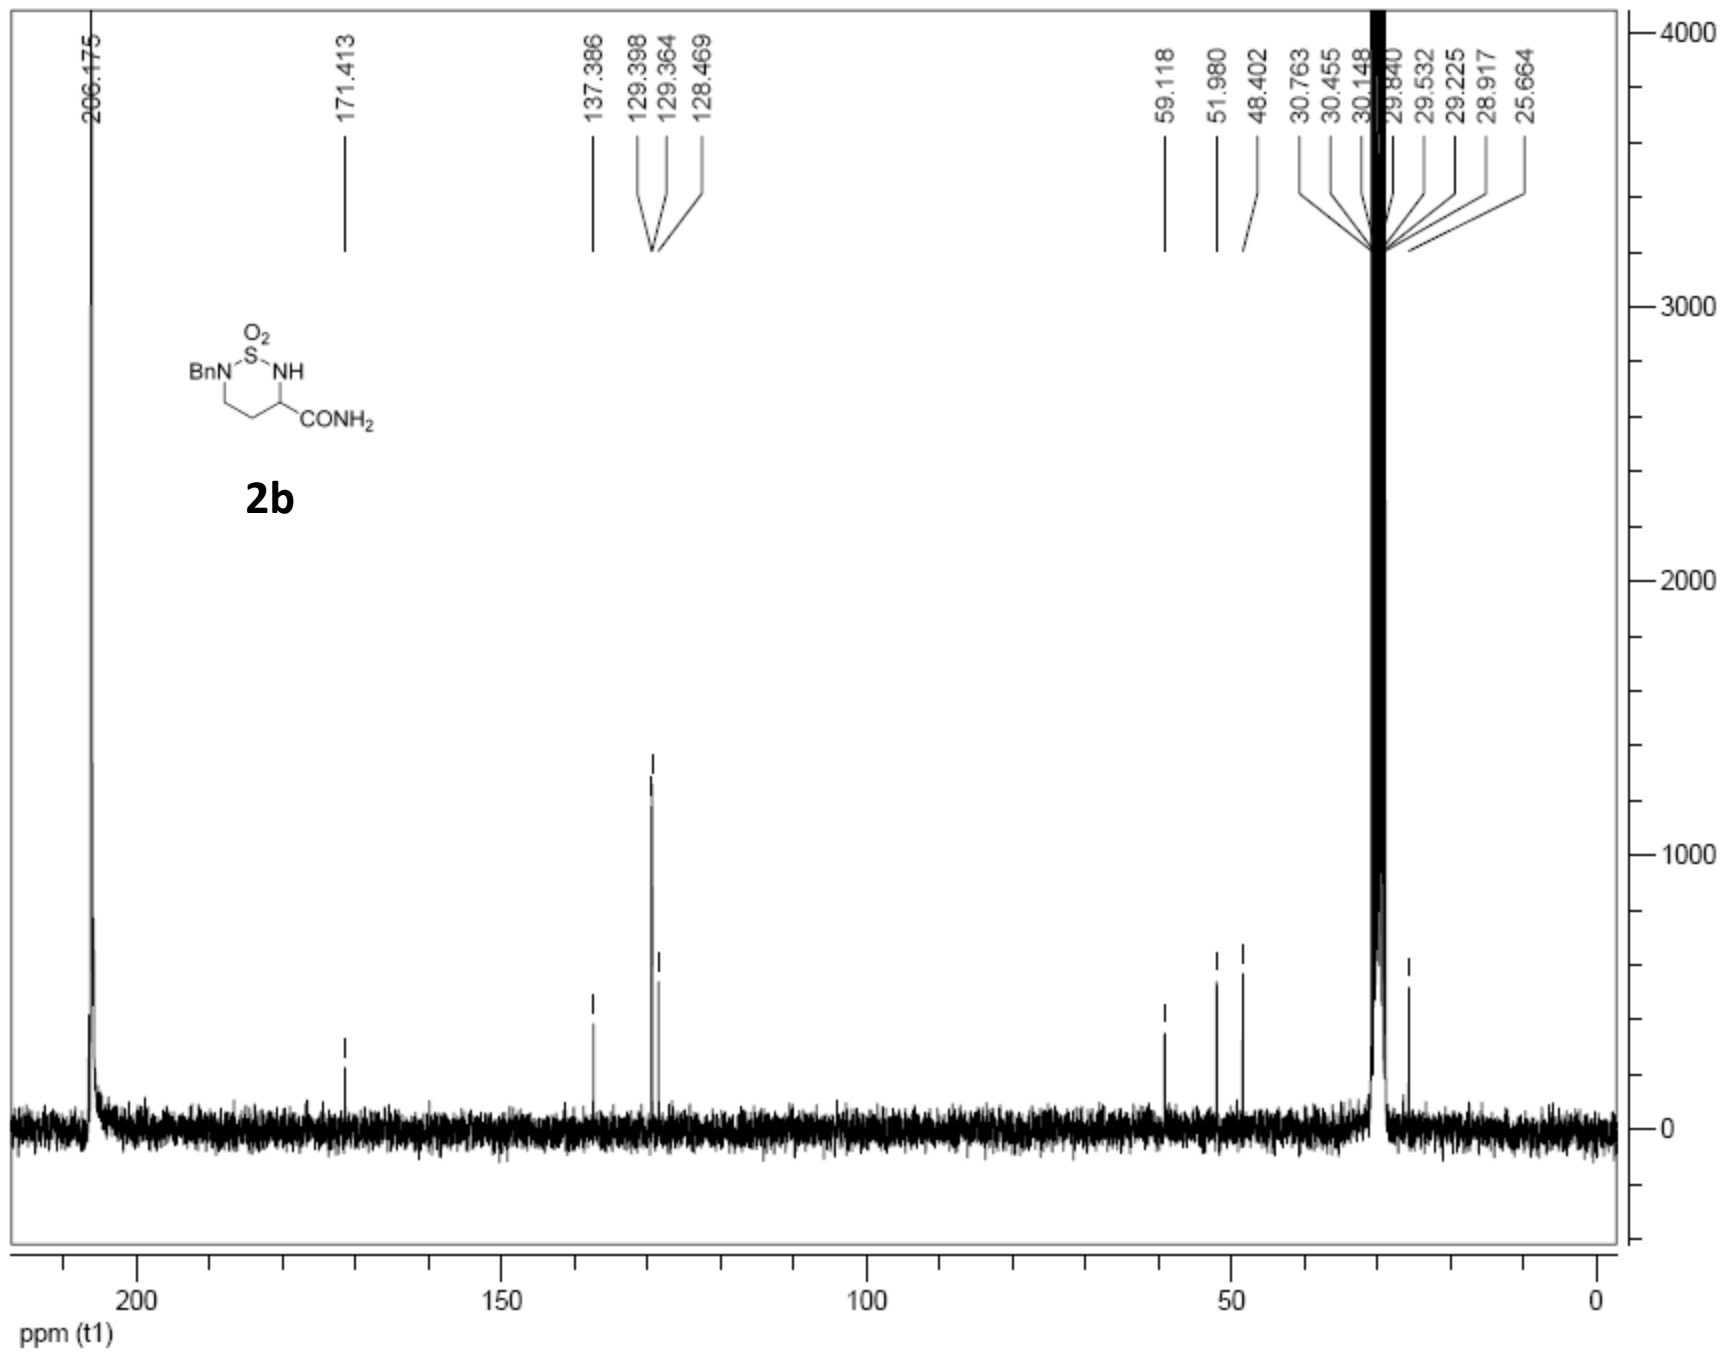

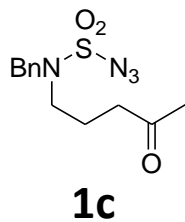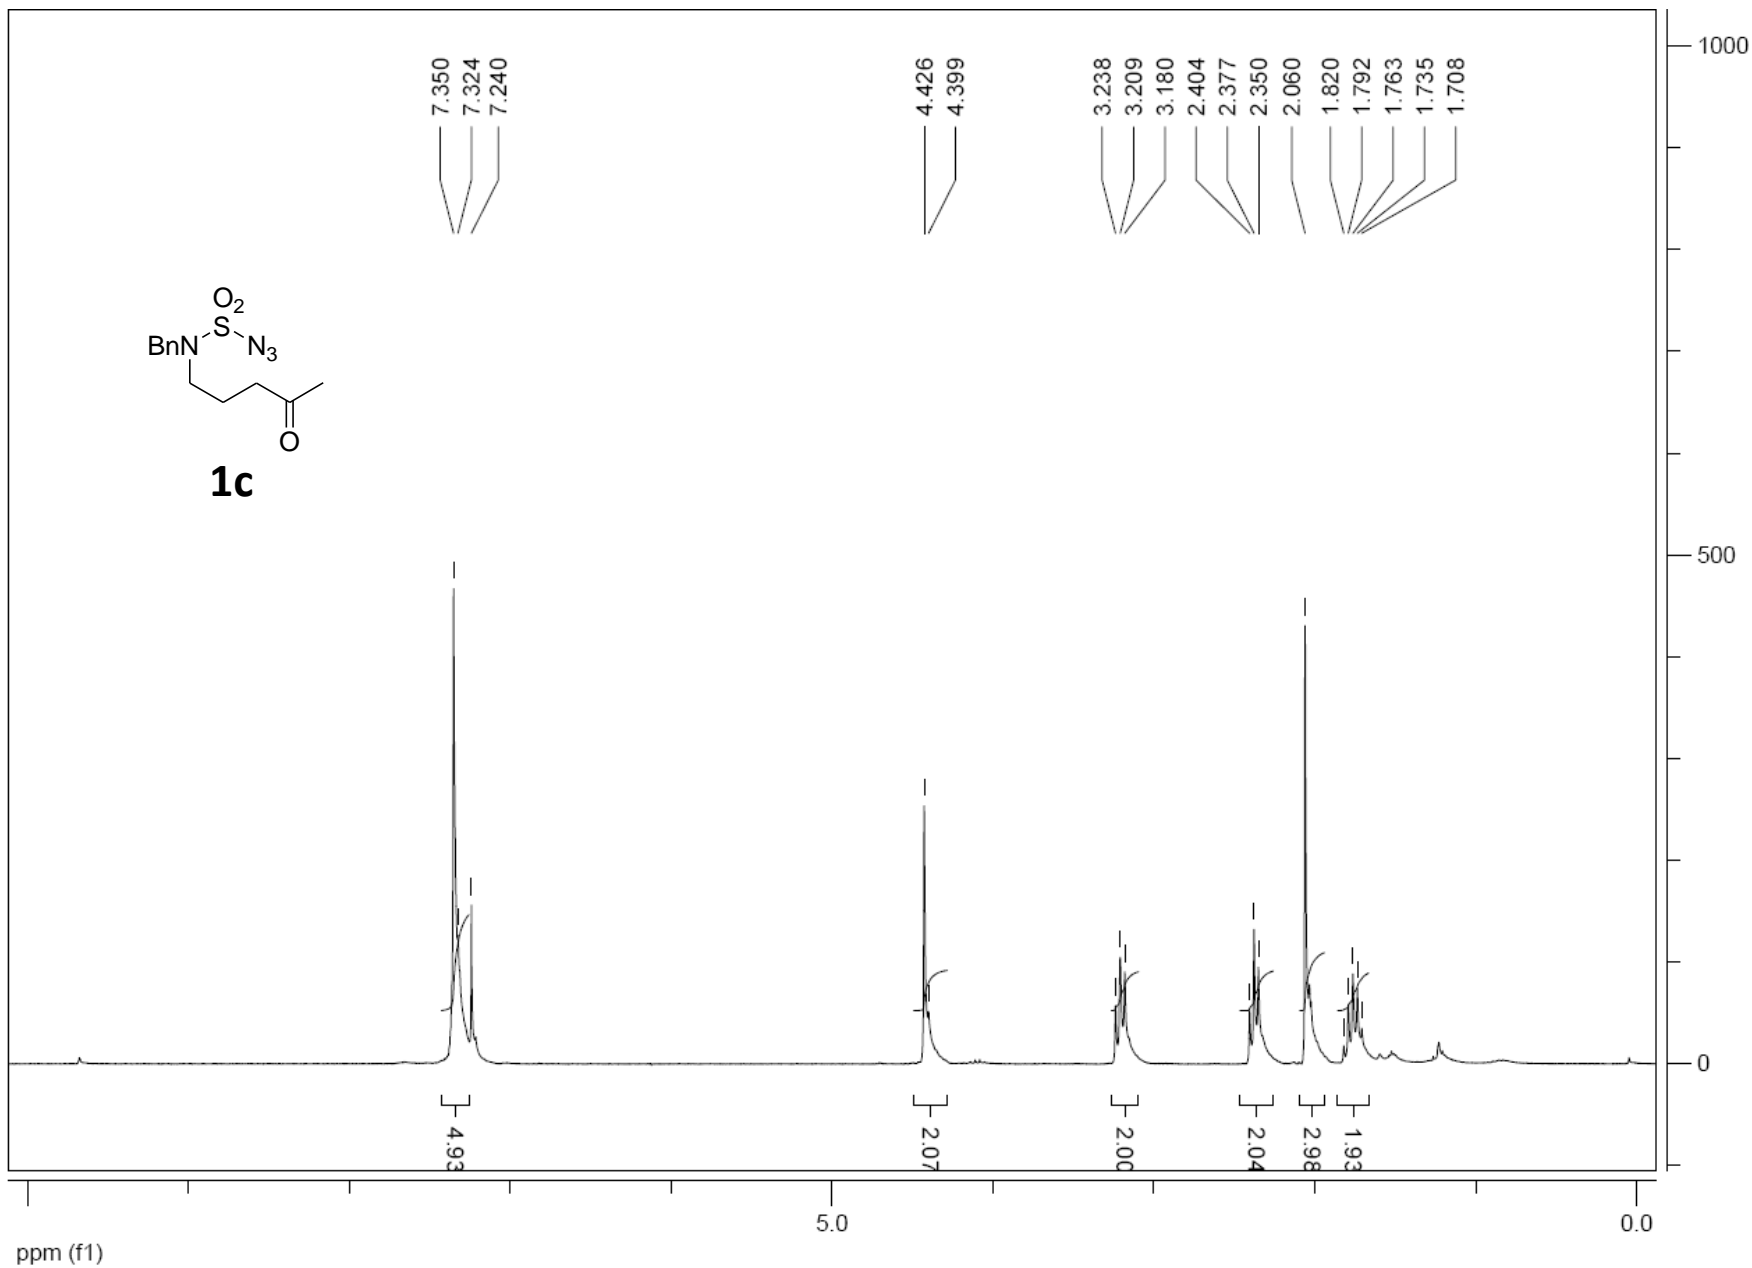

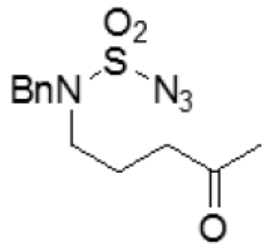

**1c**

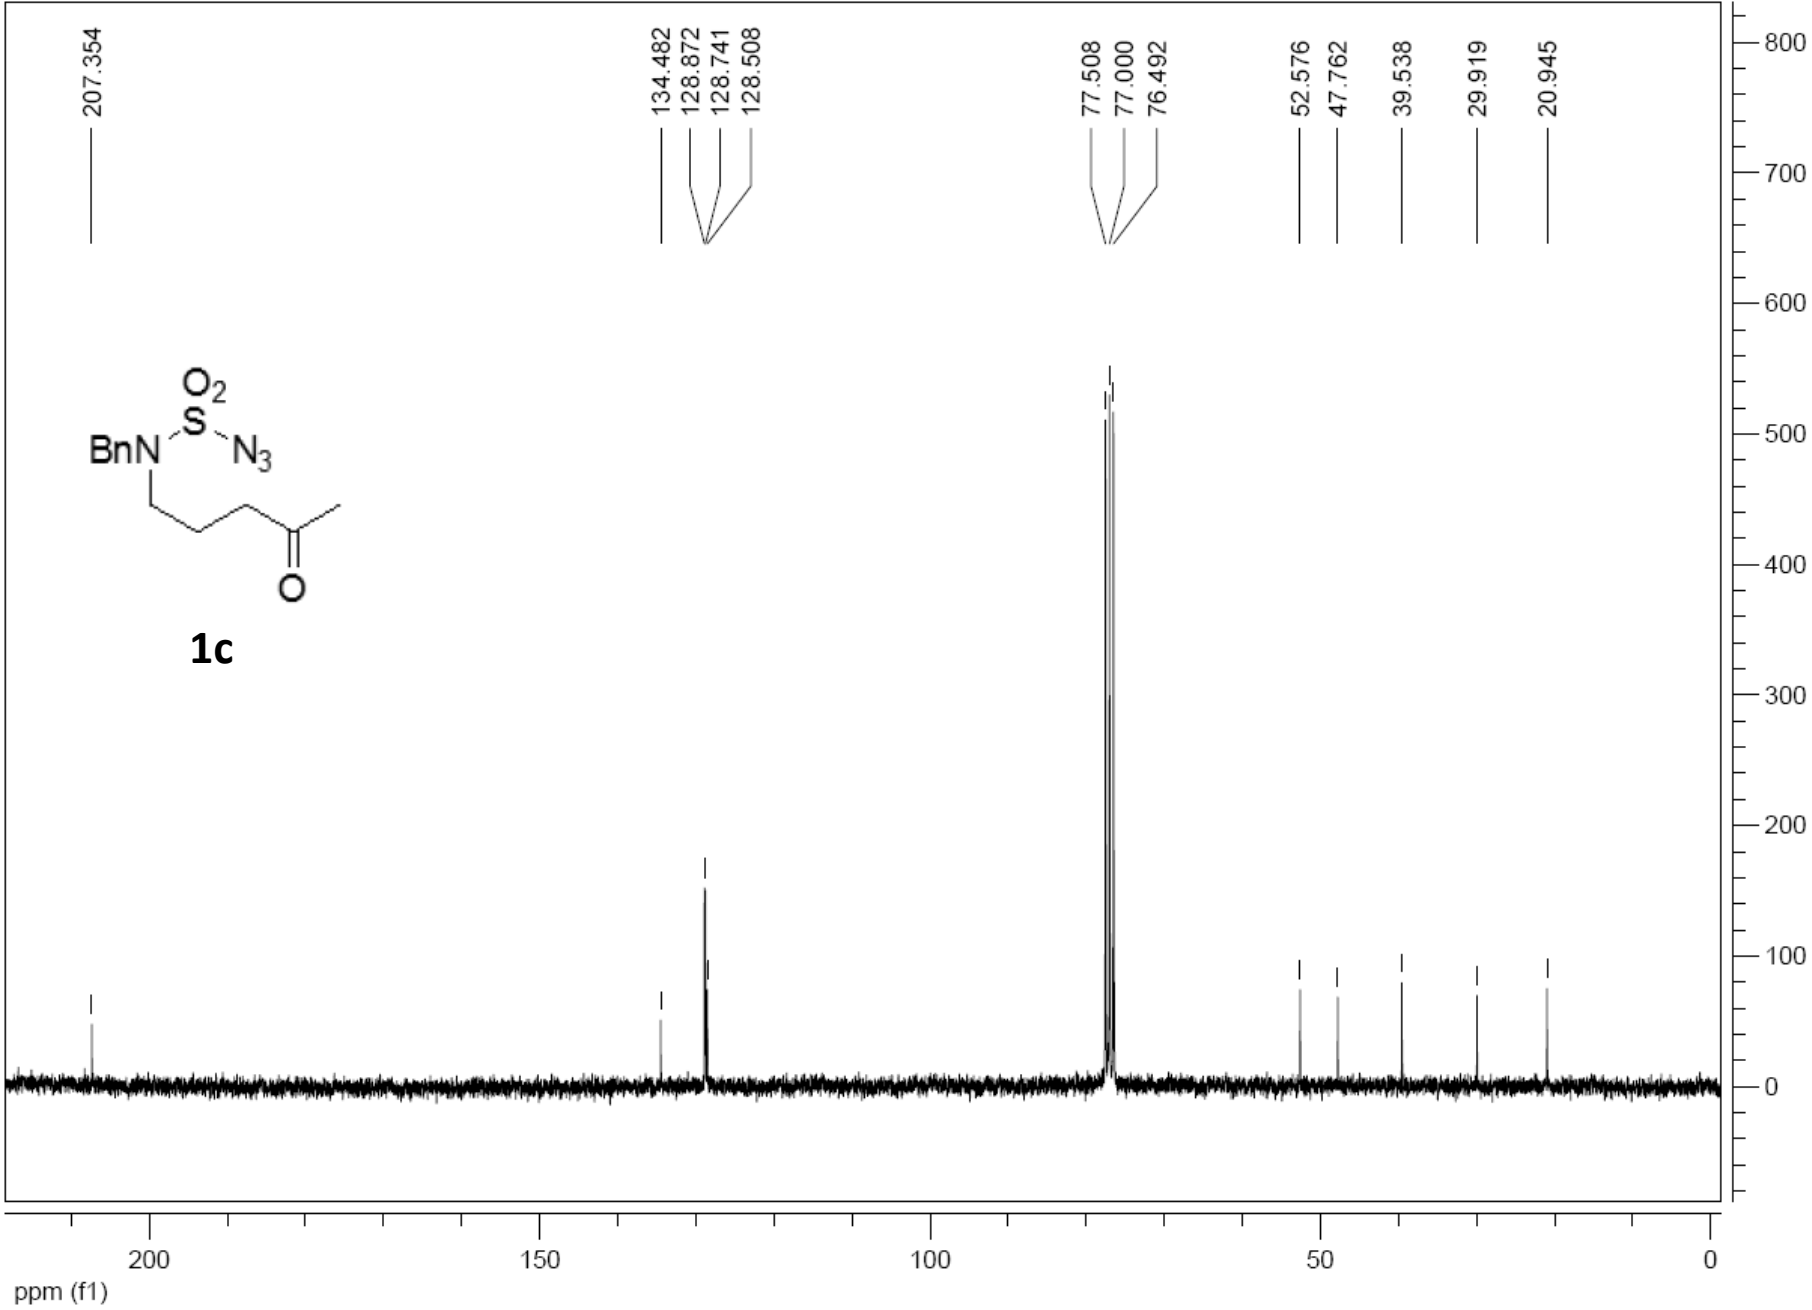

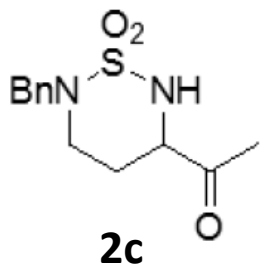

7.340  
7.338  
7.334  
7.321  
7.313  
7.301  
7.291  
7.281  
7.275  
7.241  
4.803  
4.779  
4.460  
4.452  
4.437  
4.429  
4.422  
4.407  
4.398  
4.387  
4.012  
3.977  
3.453  
3.446  
3.420  
3.413  
3.389  
3.382  
3.200  
3.192  
3.189  
3.181  
3.167  
3.159  
3.156  
3.148  
2.239  
1.884  
1.877  
1.869  
1.861  
1.850  
1.842  
1.834  
1.827  
1.651  
1.640  
1.621  
1.617  
1.610

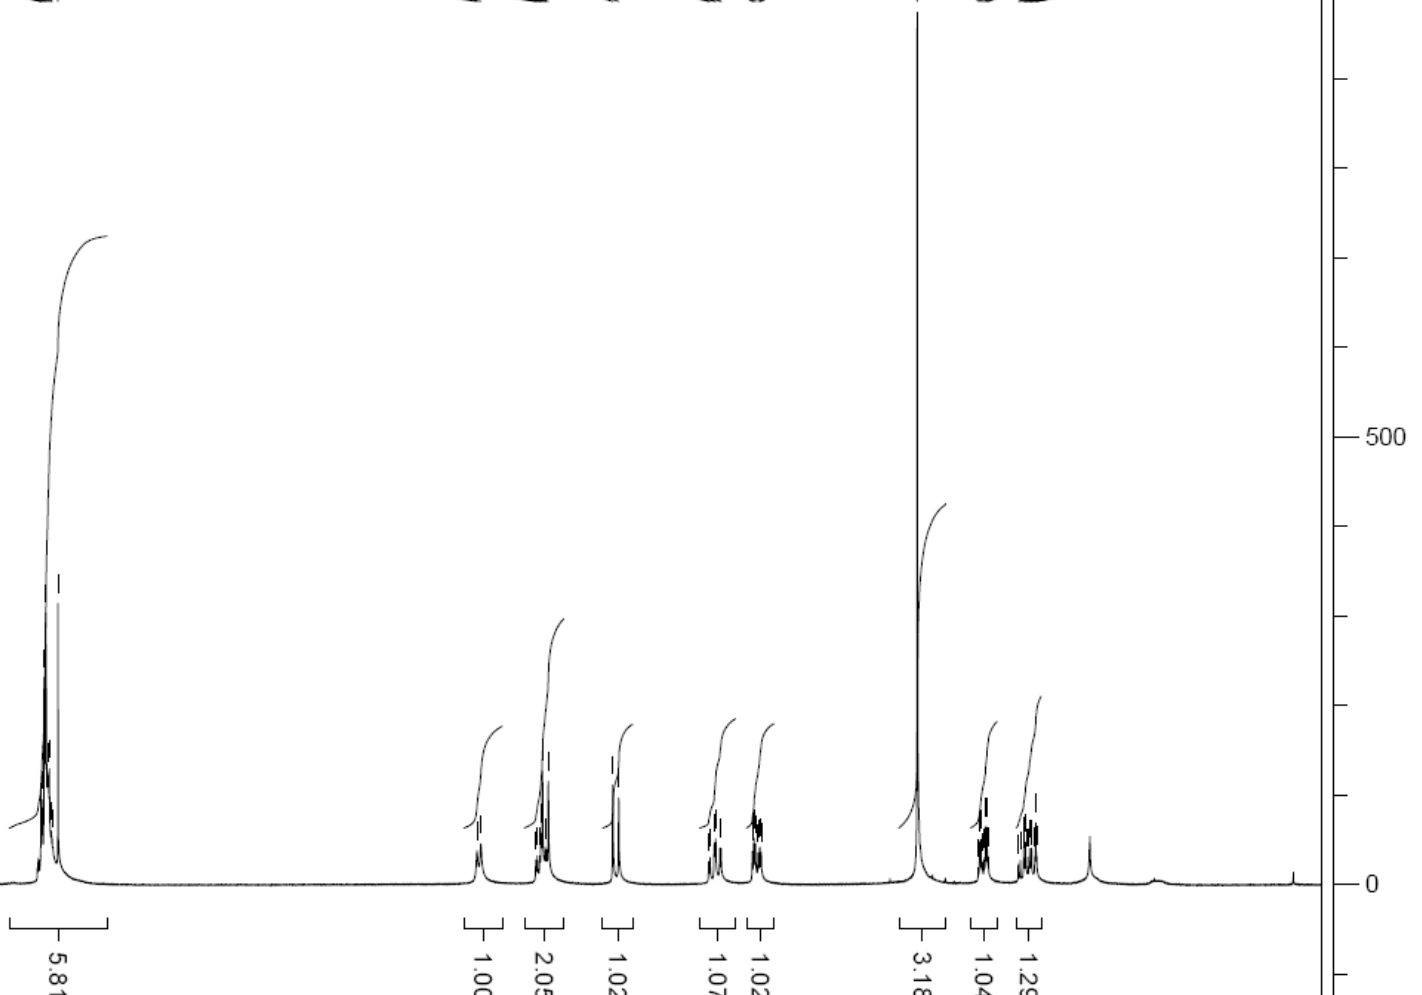

5.81

1.00

2.05

1.02

1.07

1.02

3.18

1.04

1.29

5.0

0.0

ppm (f1)

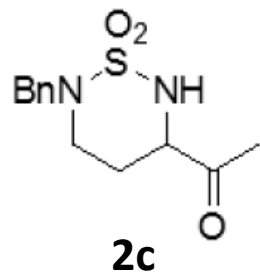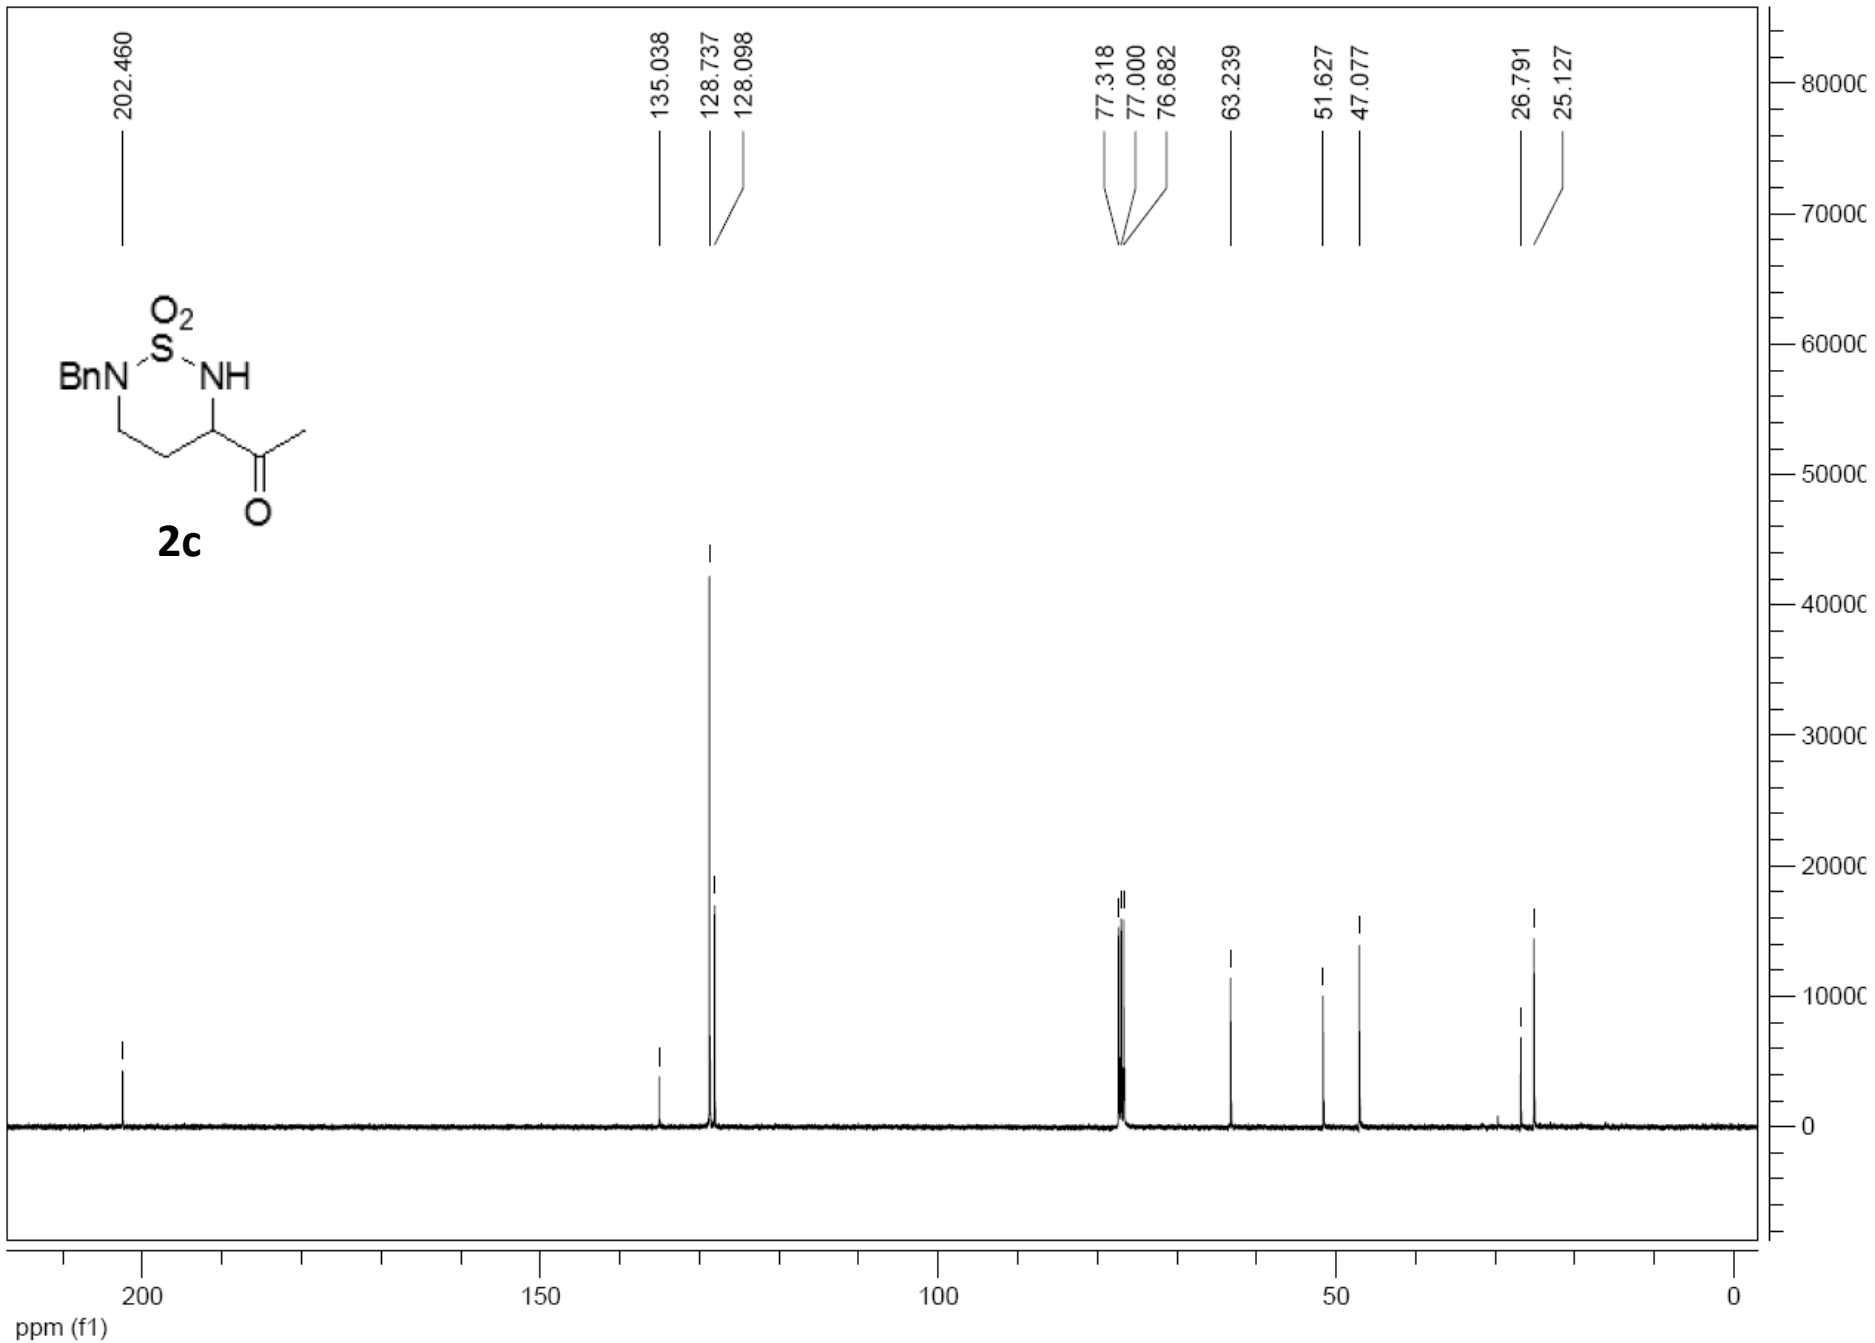

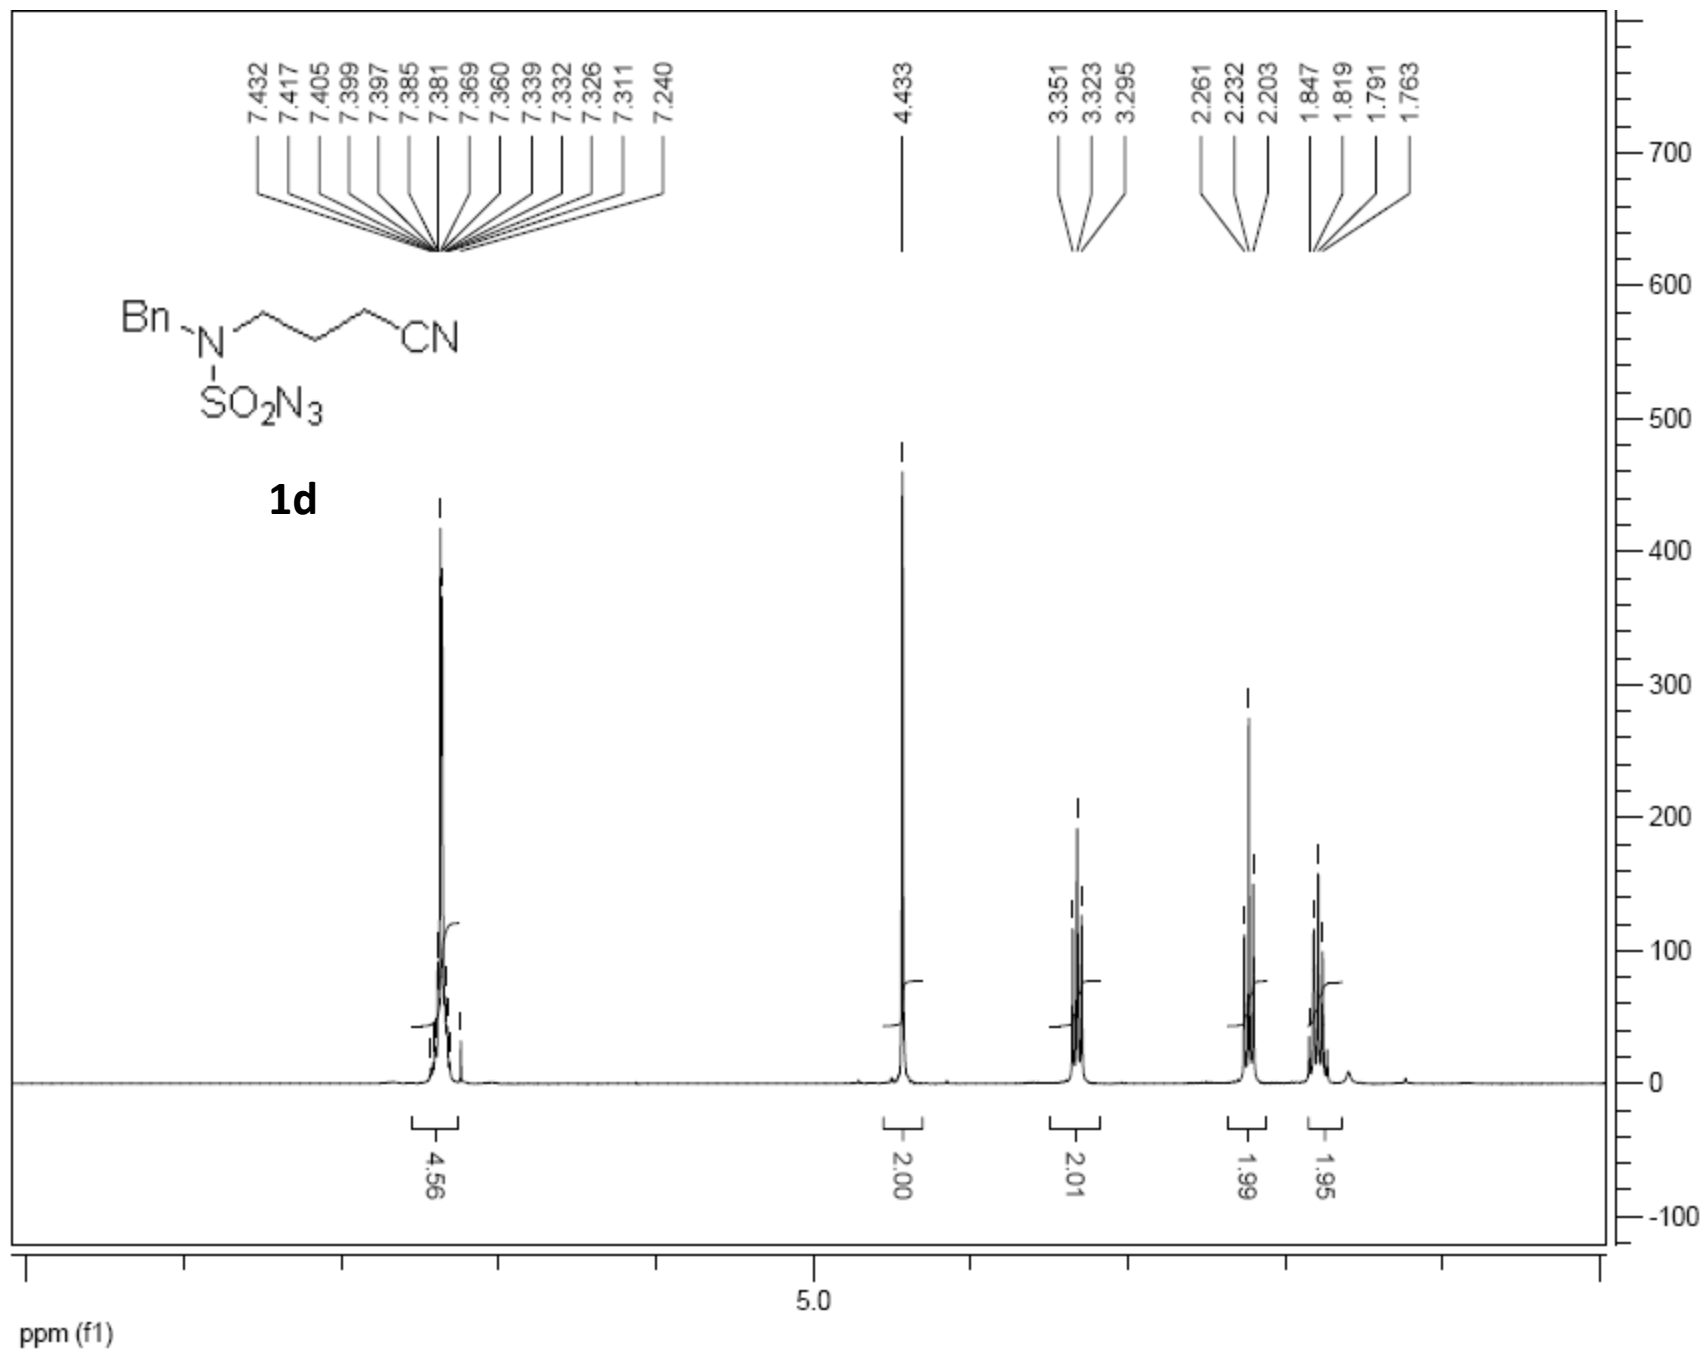

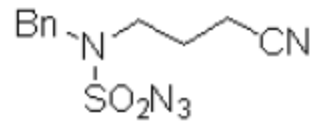

**1d**

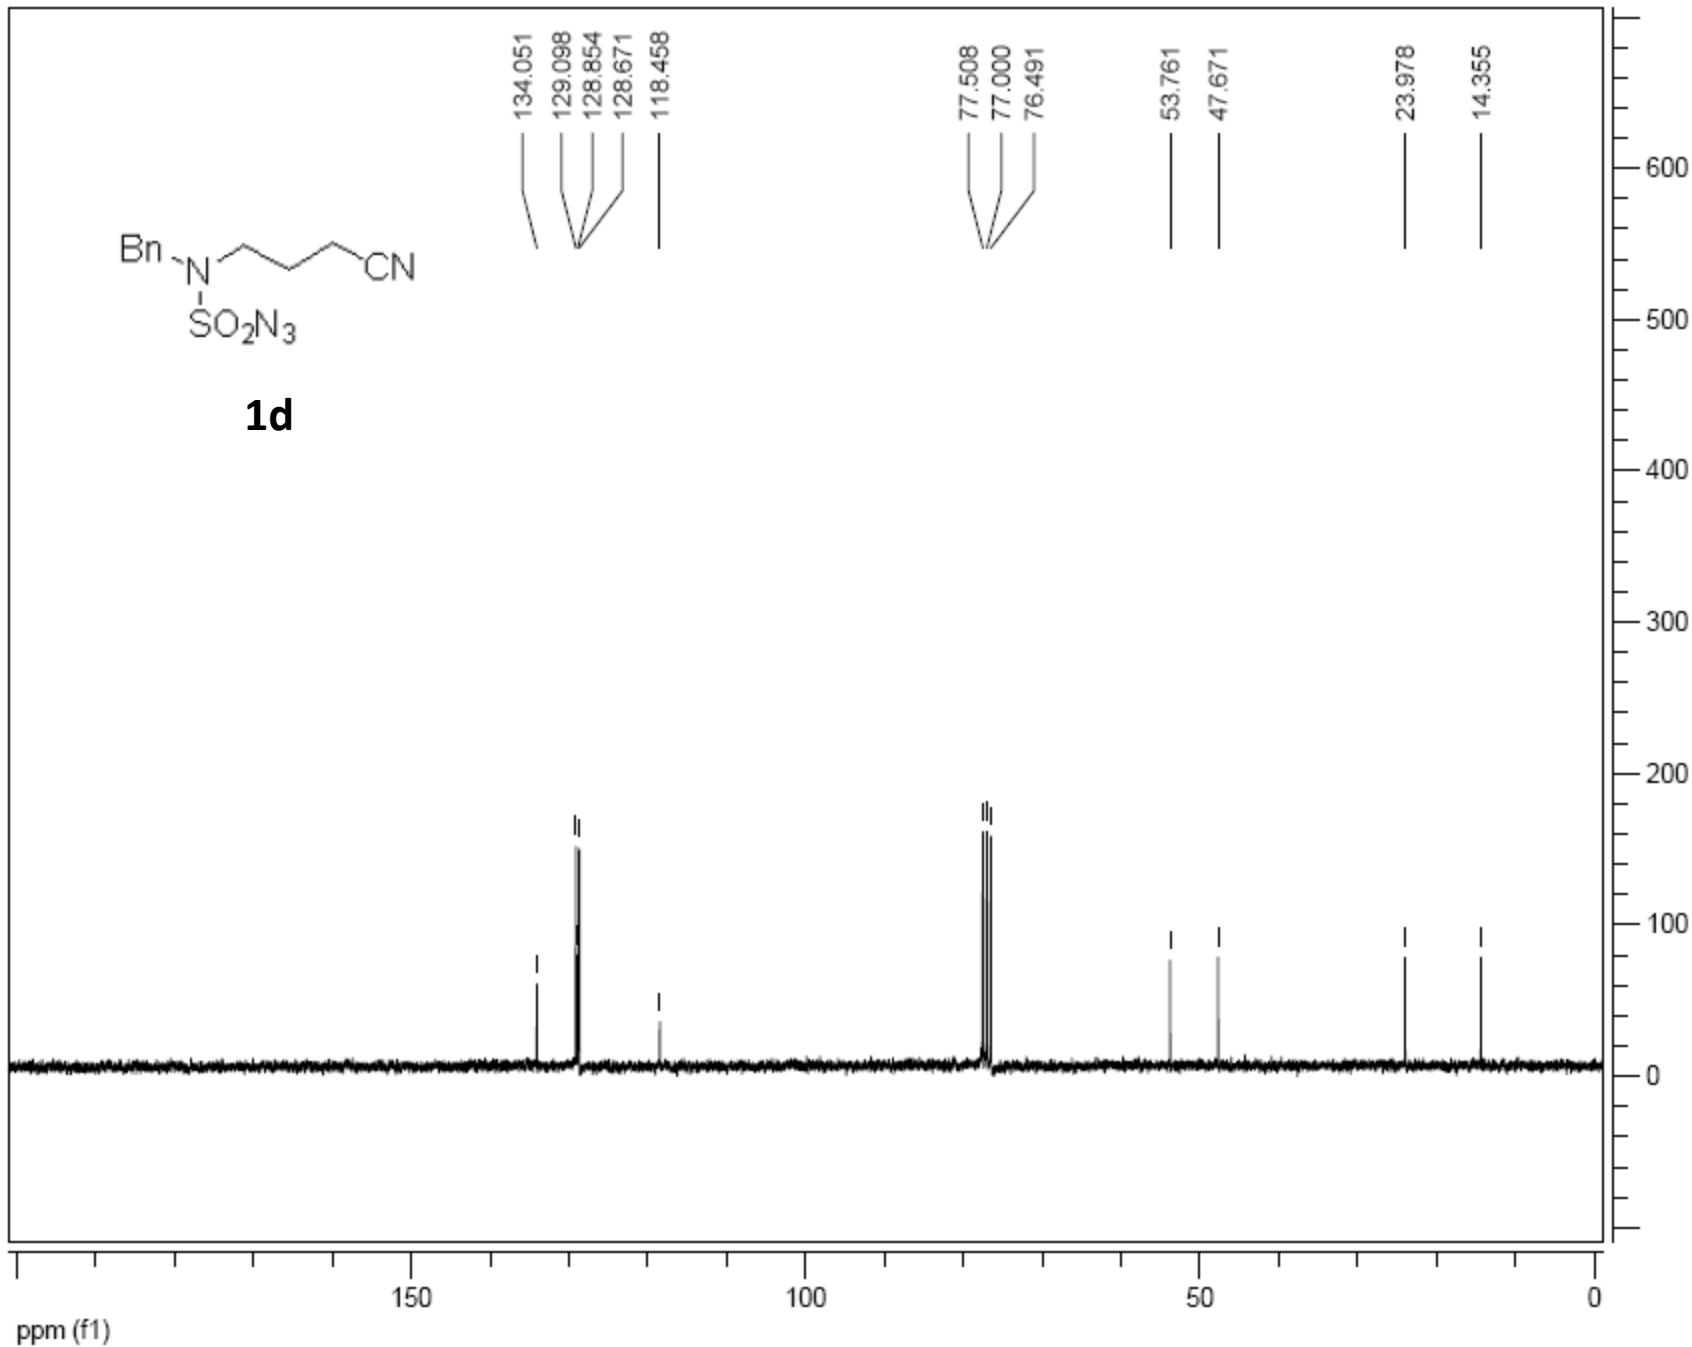

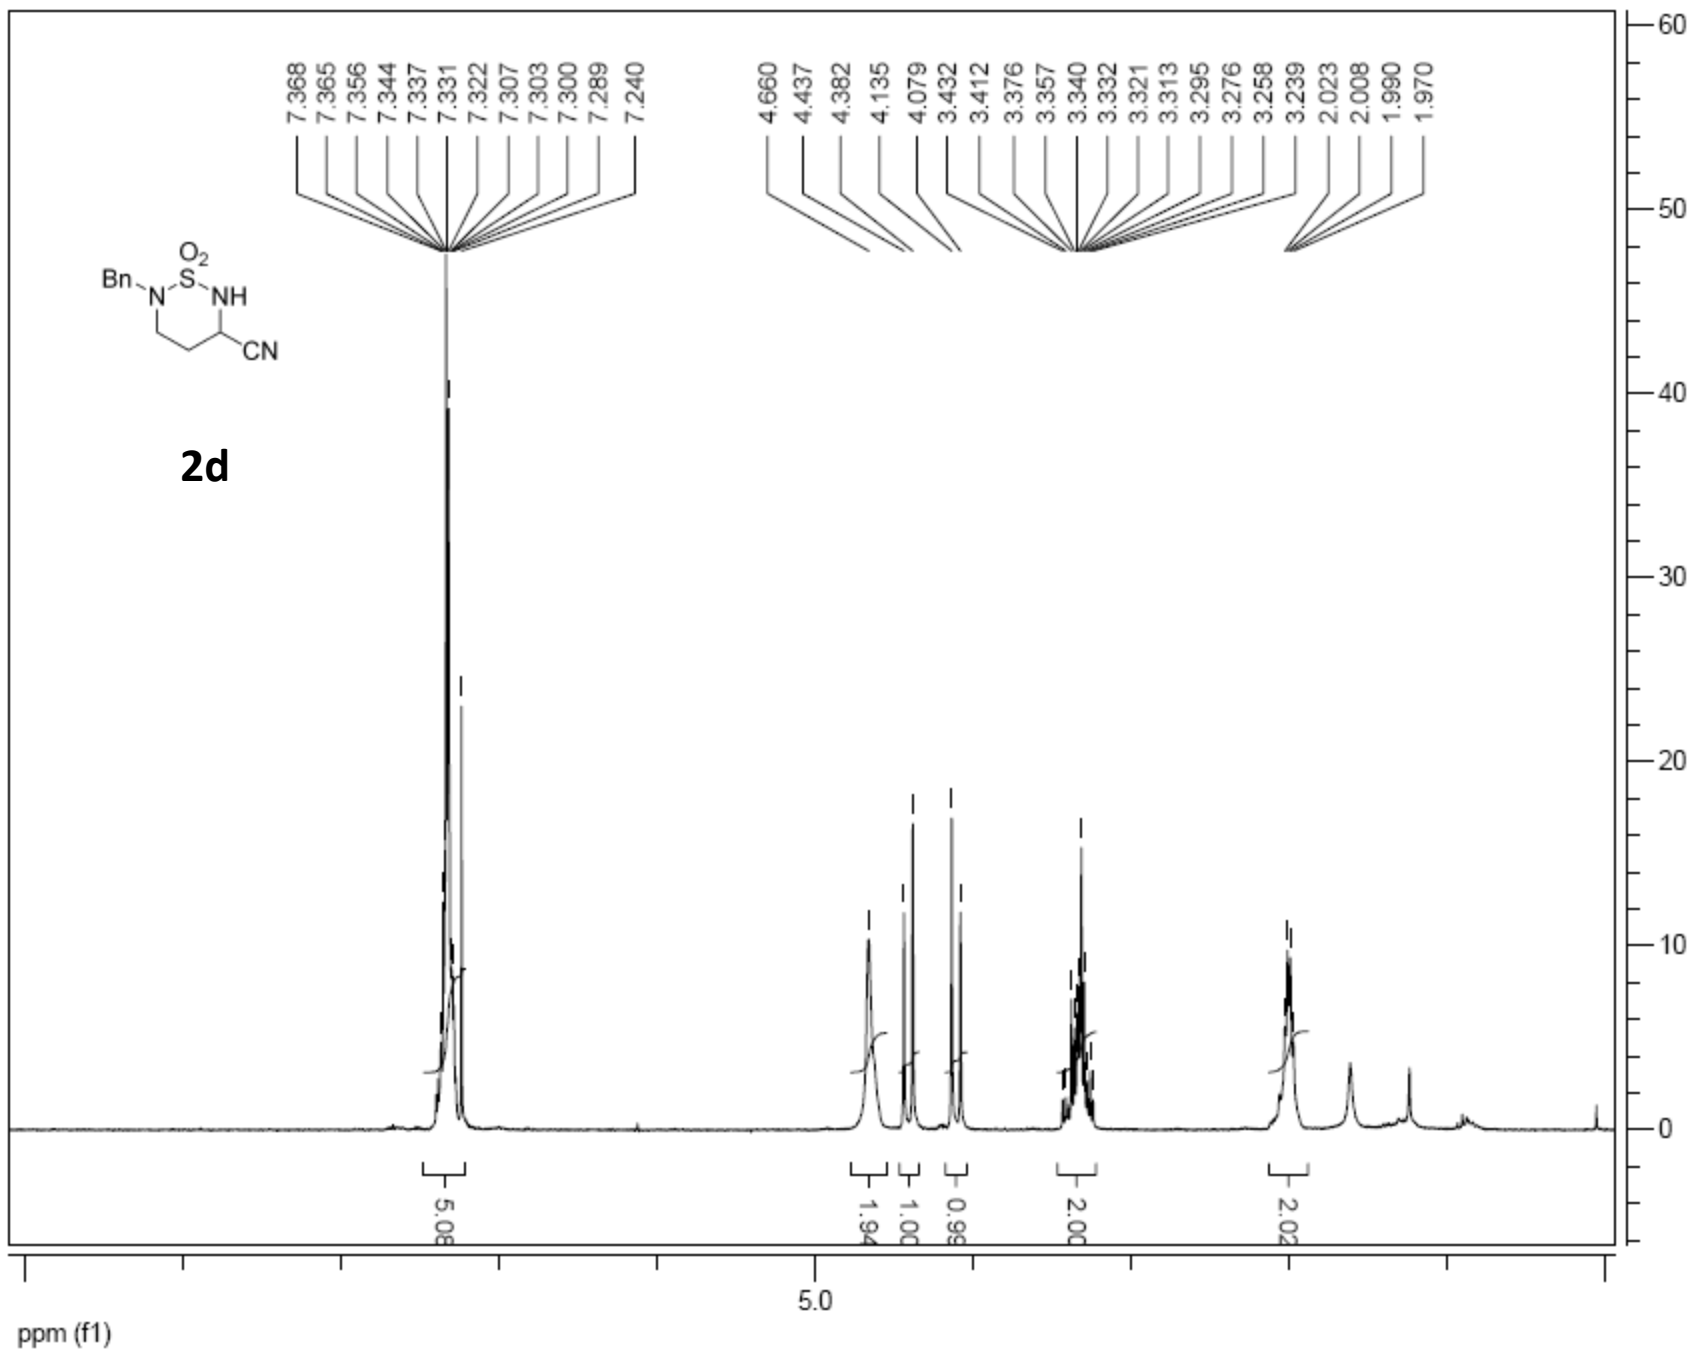



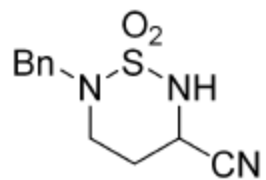

**2d**

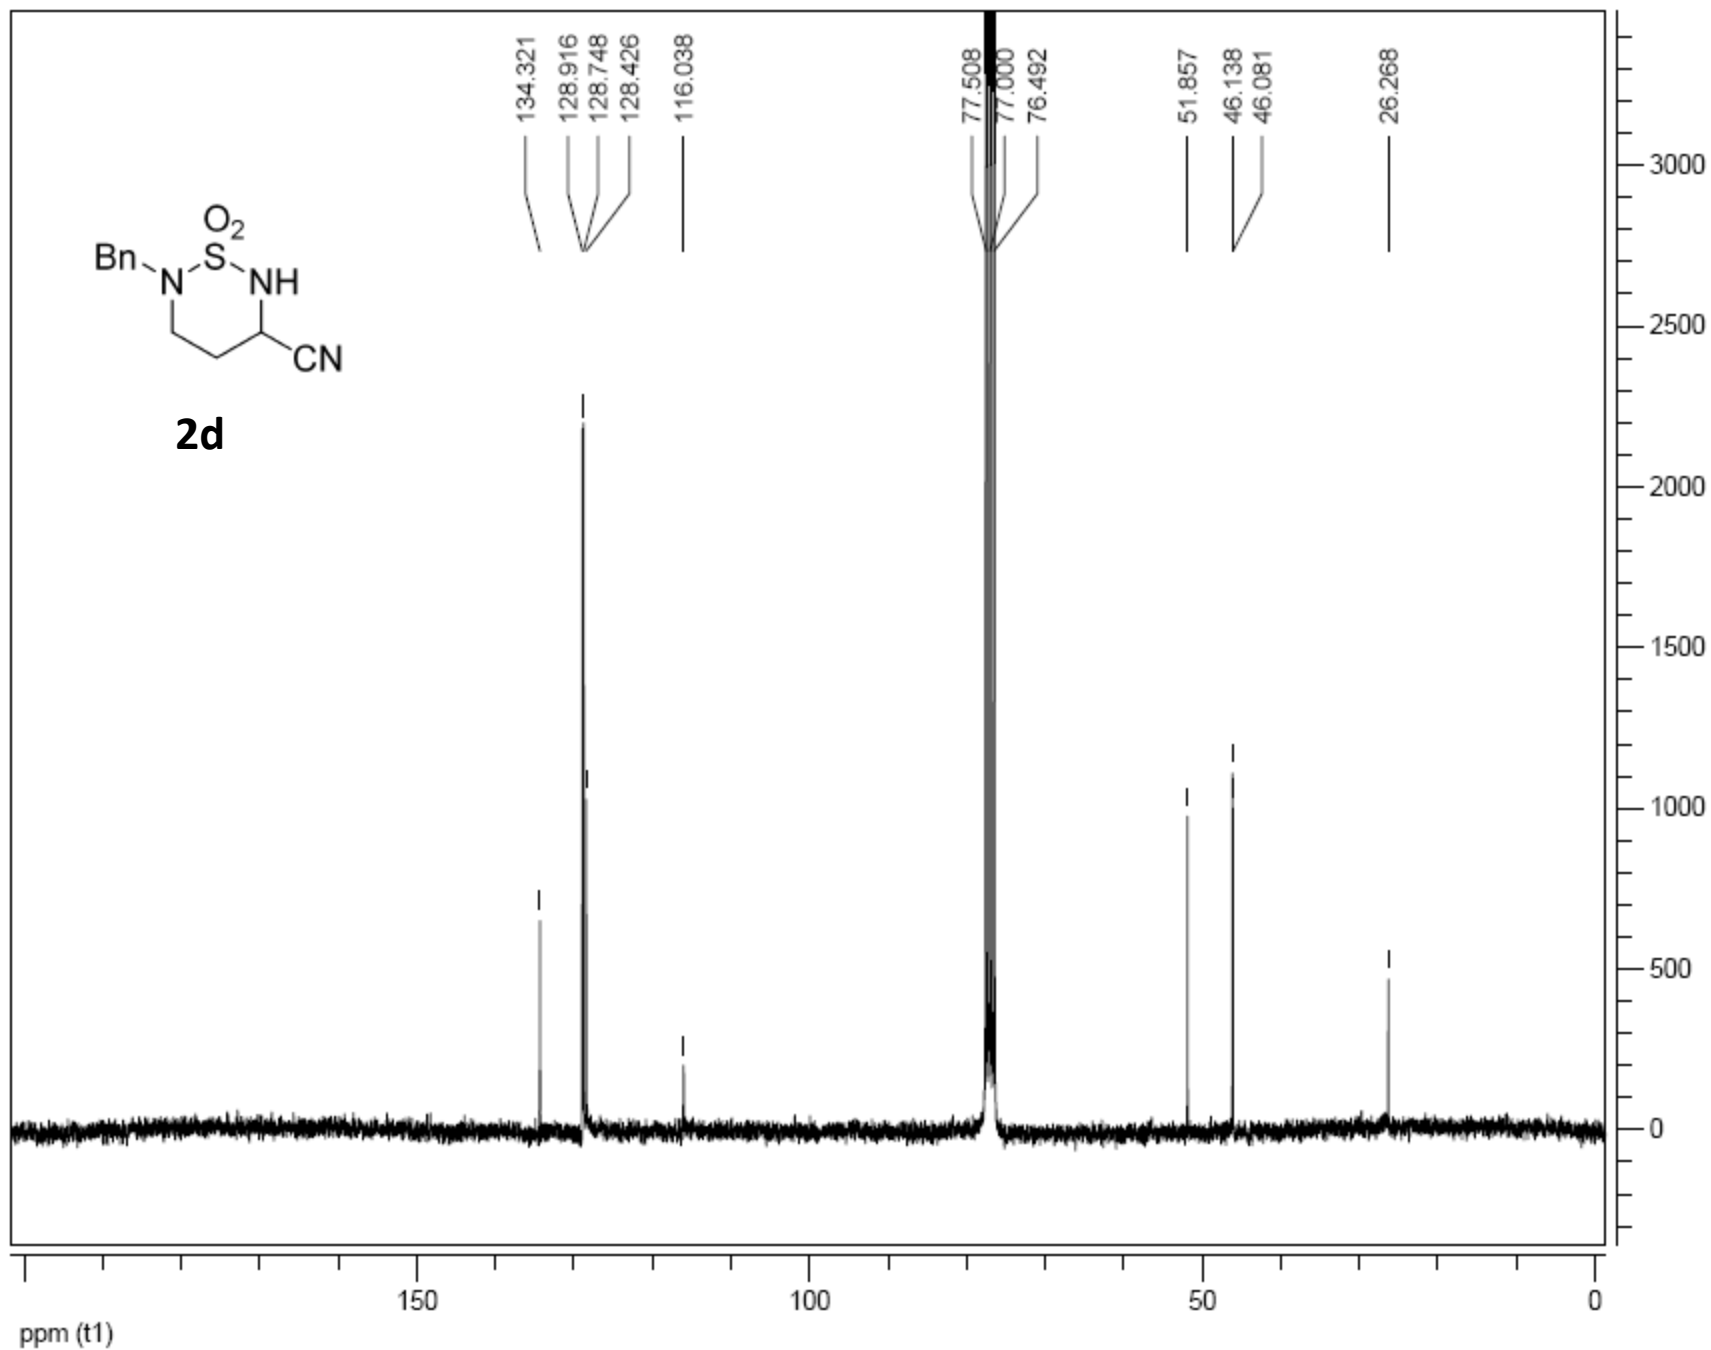



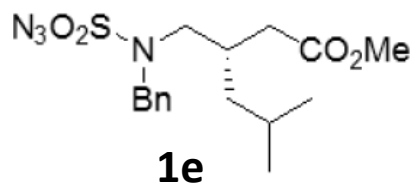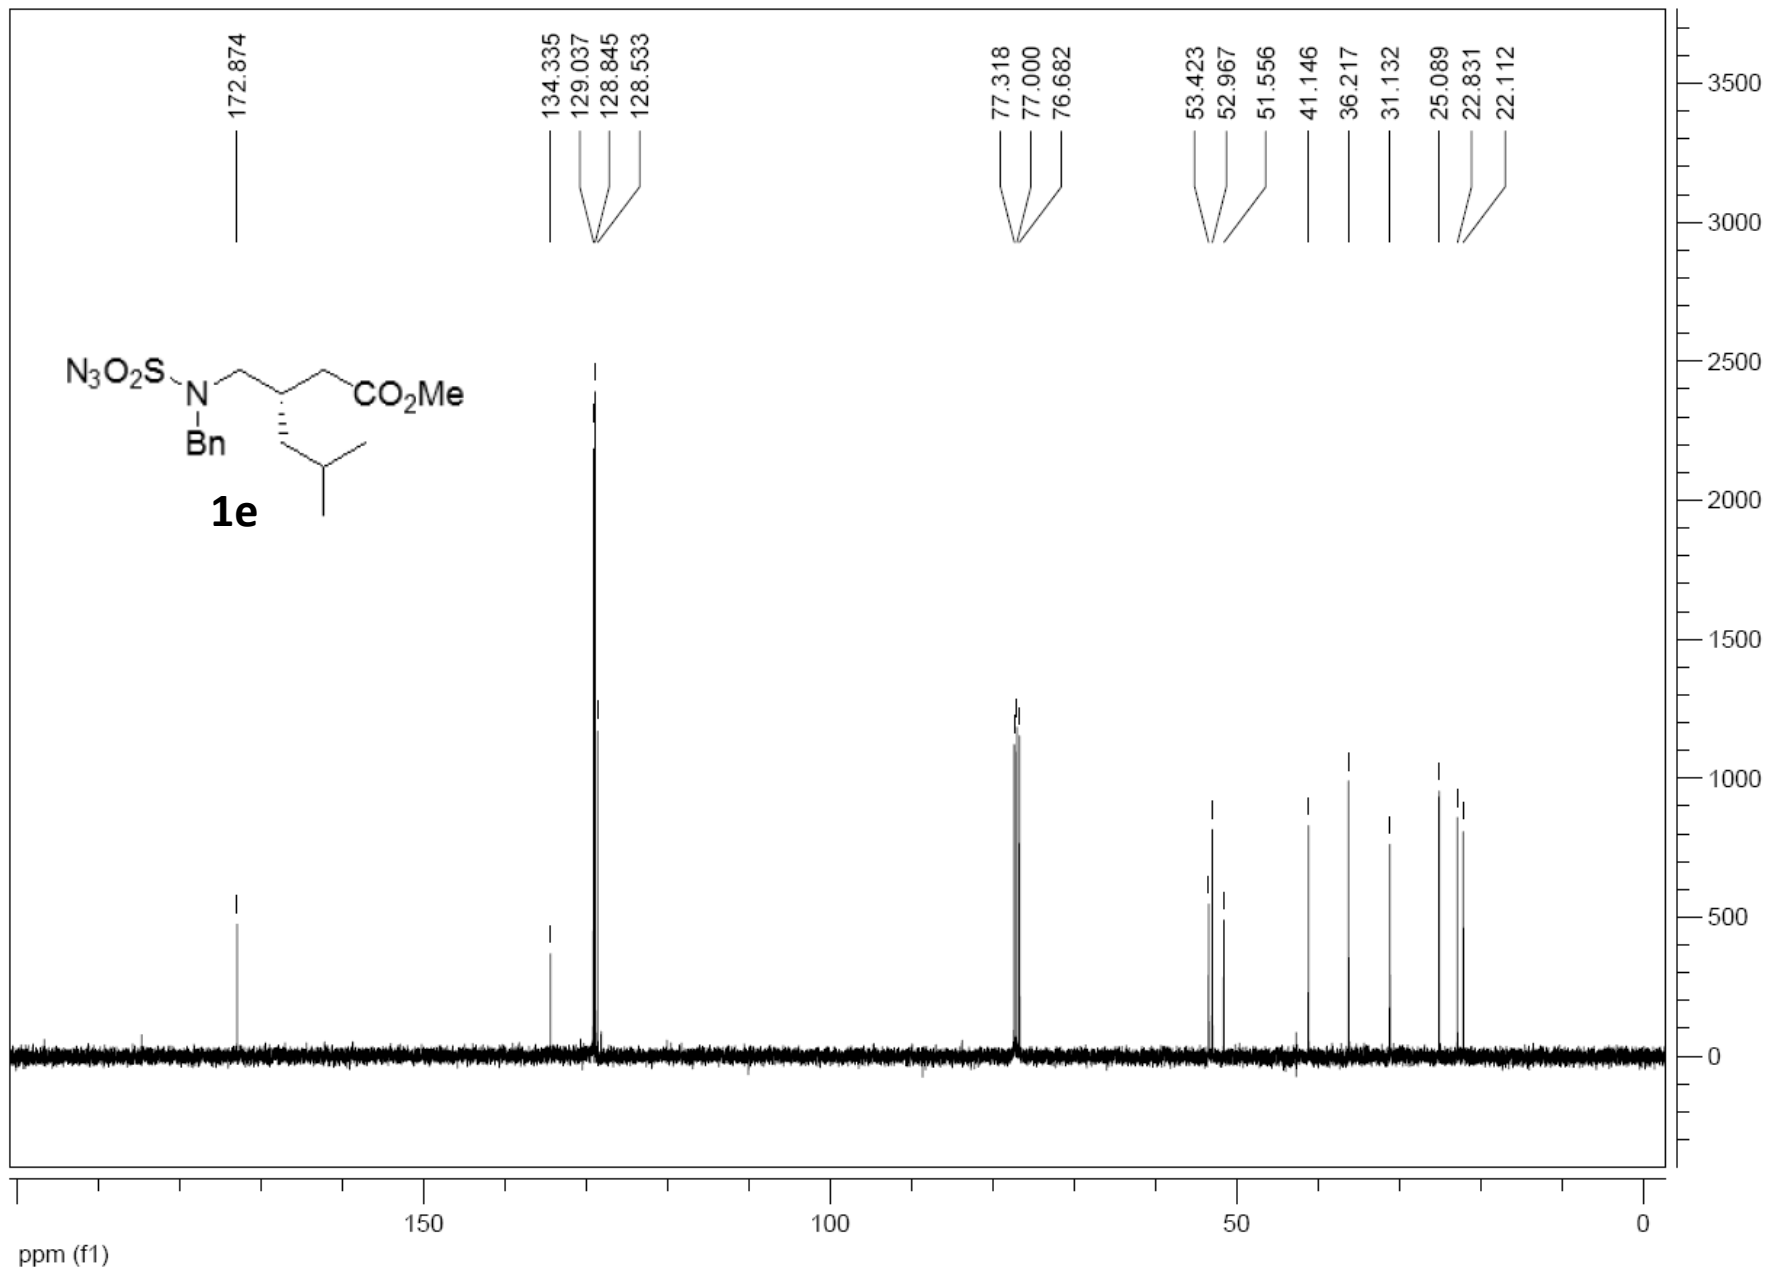

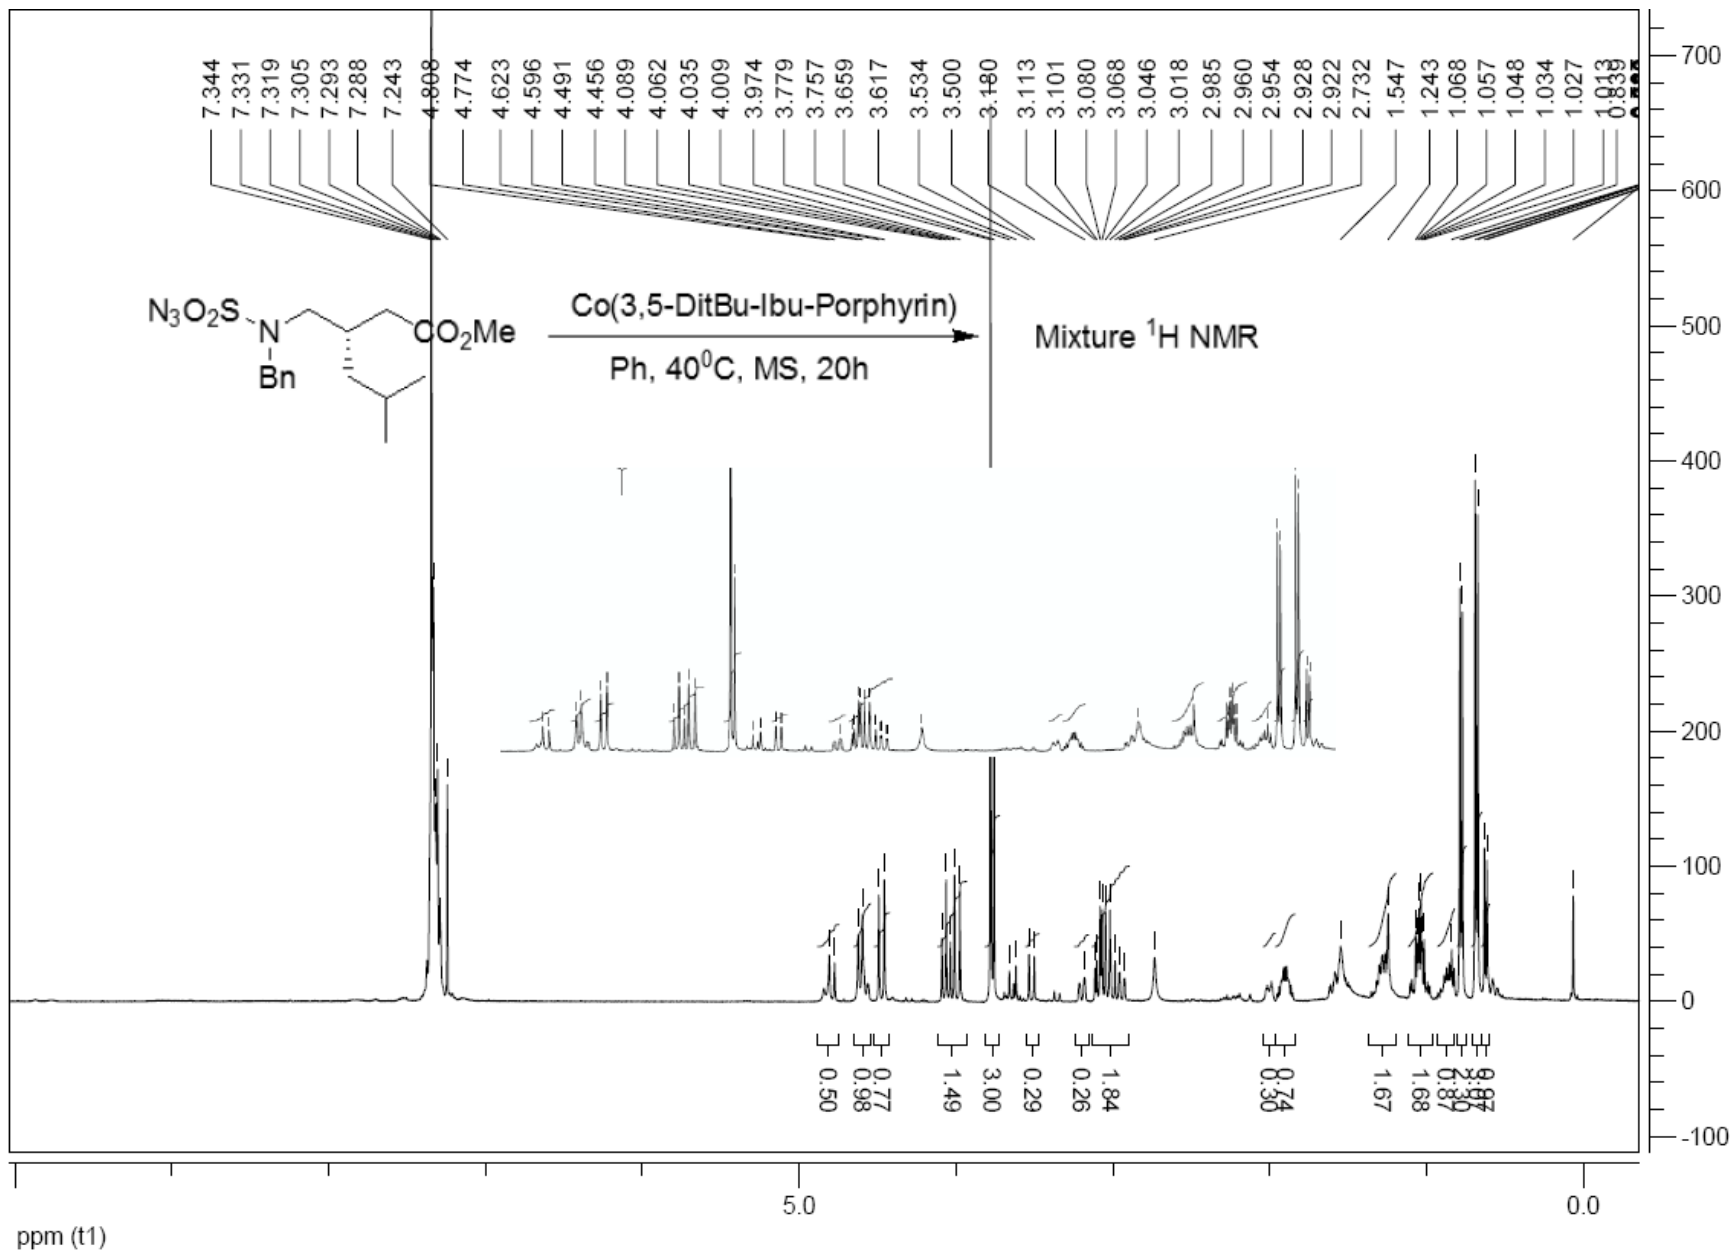

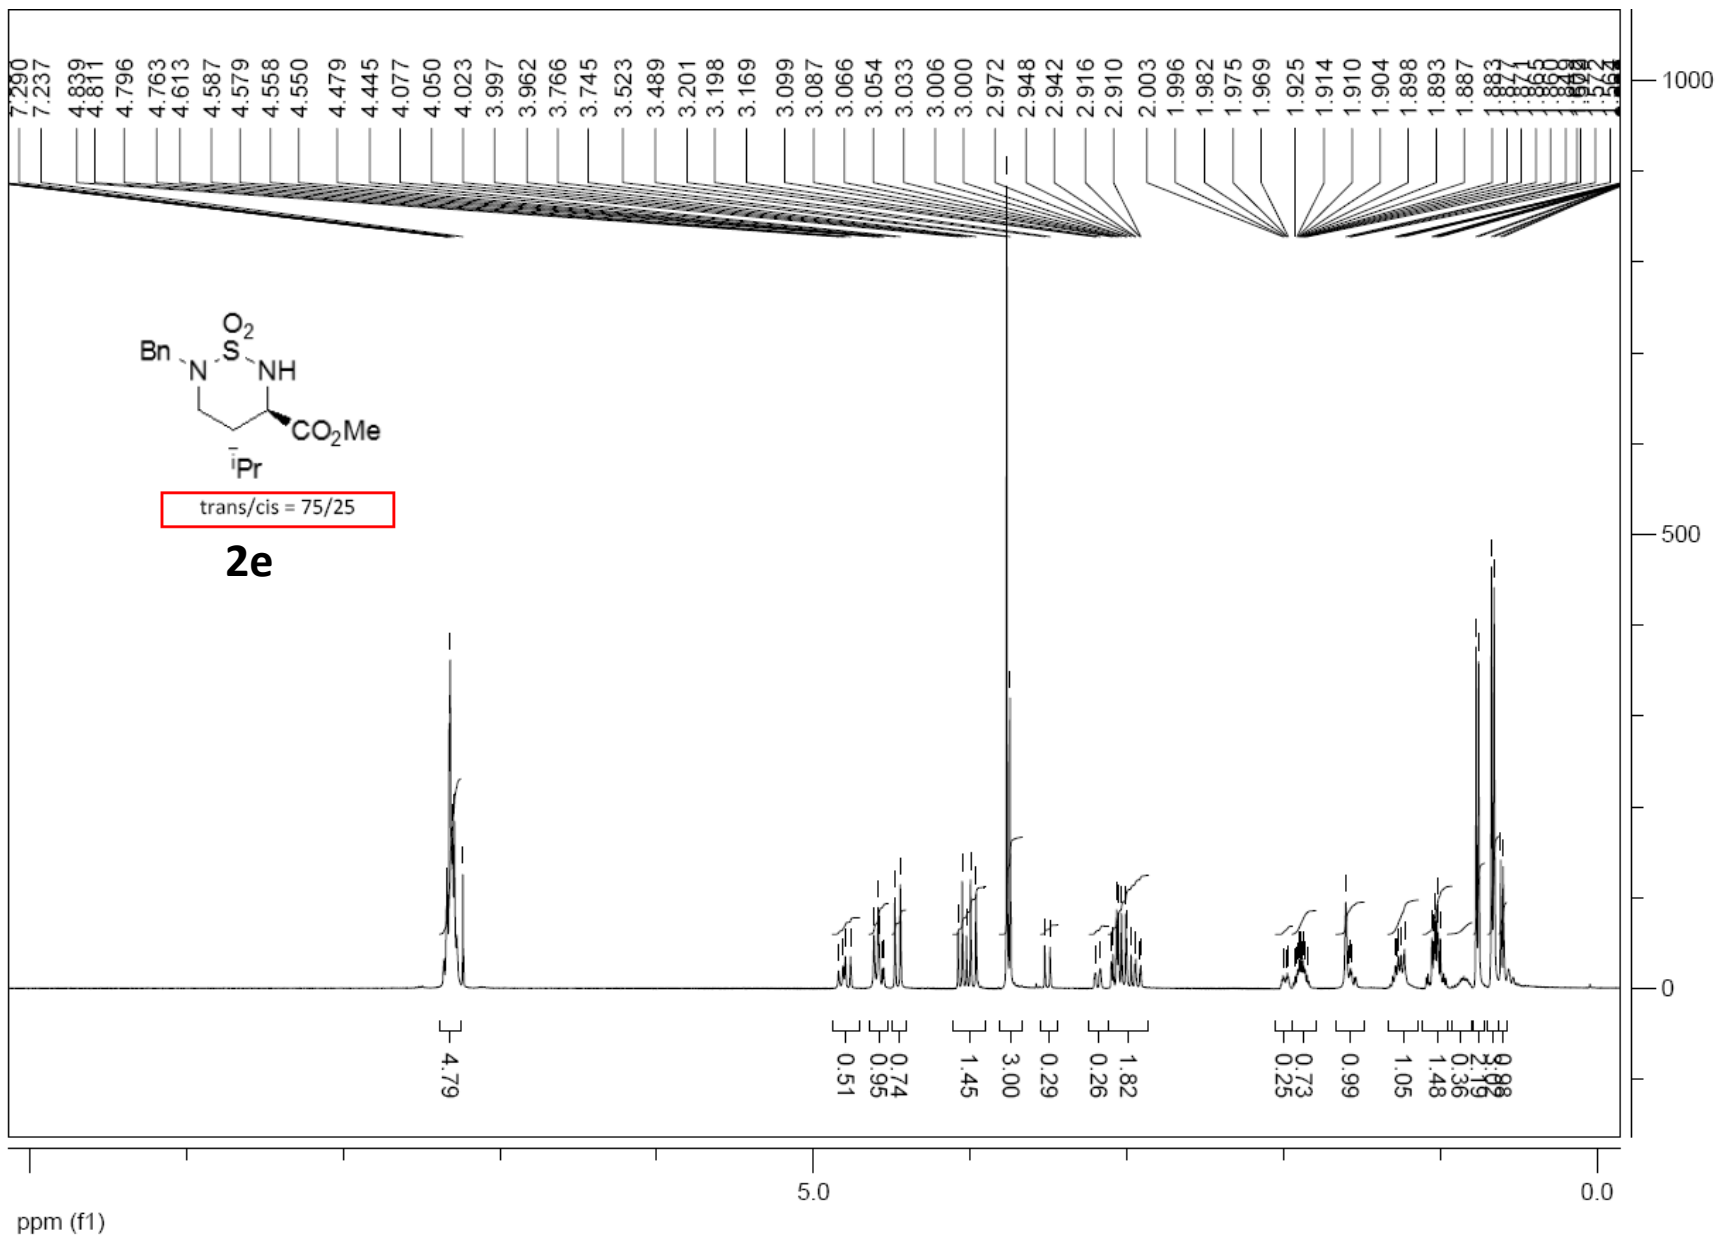

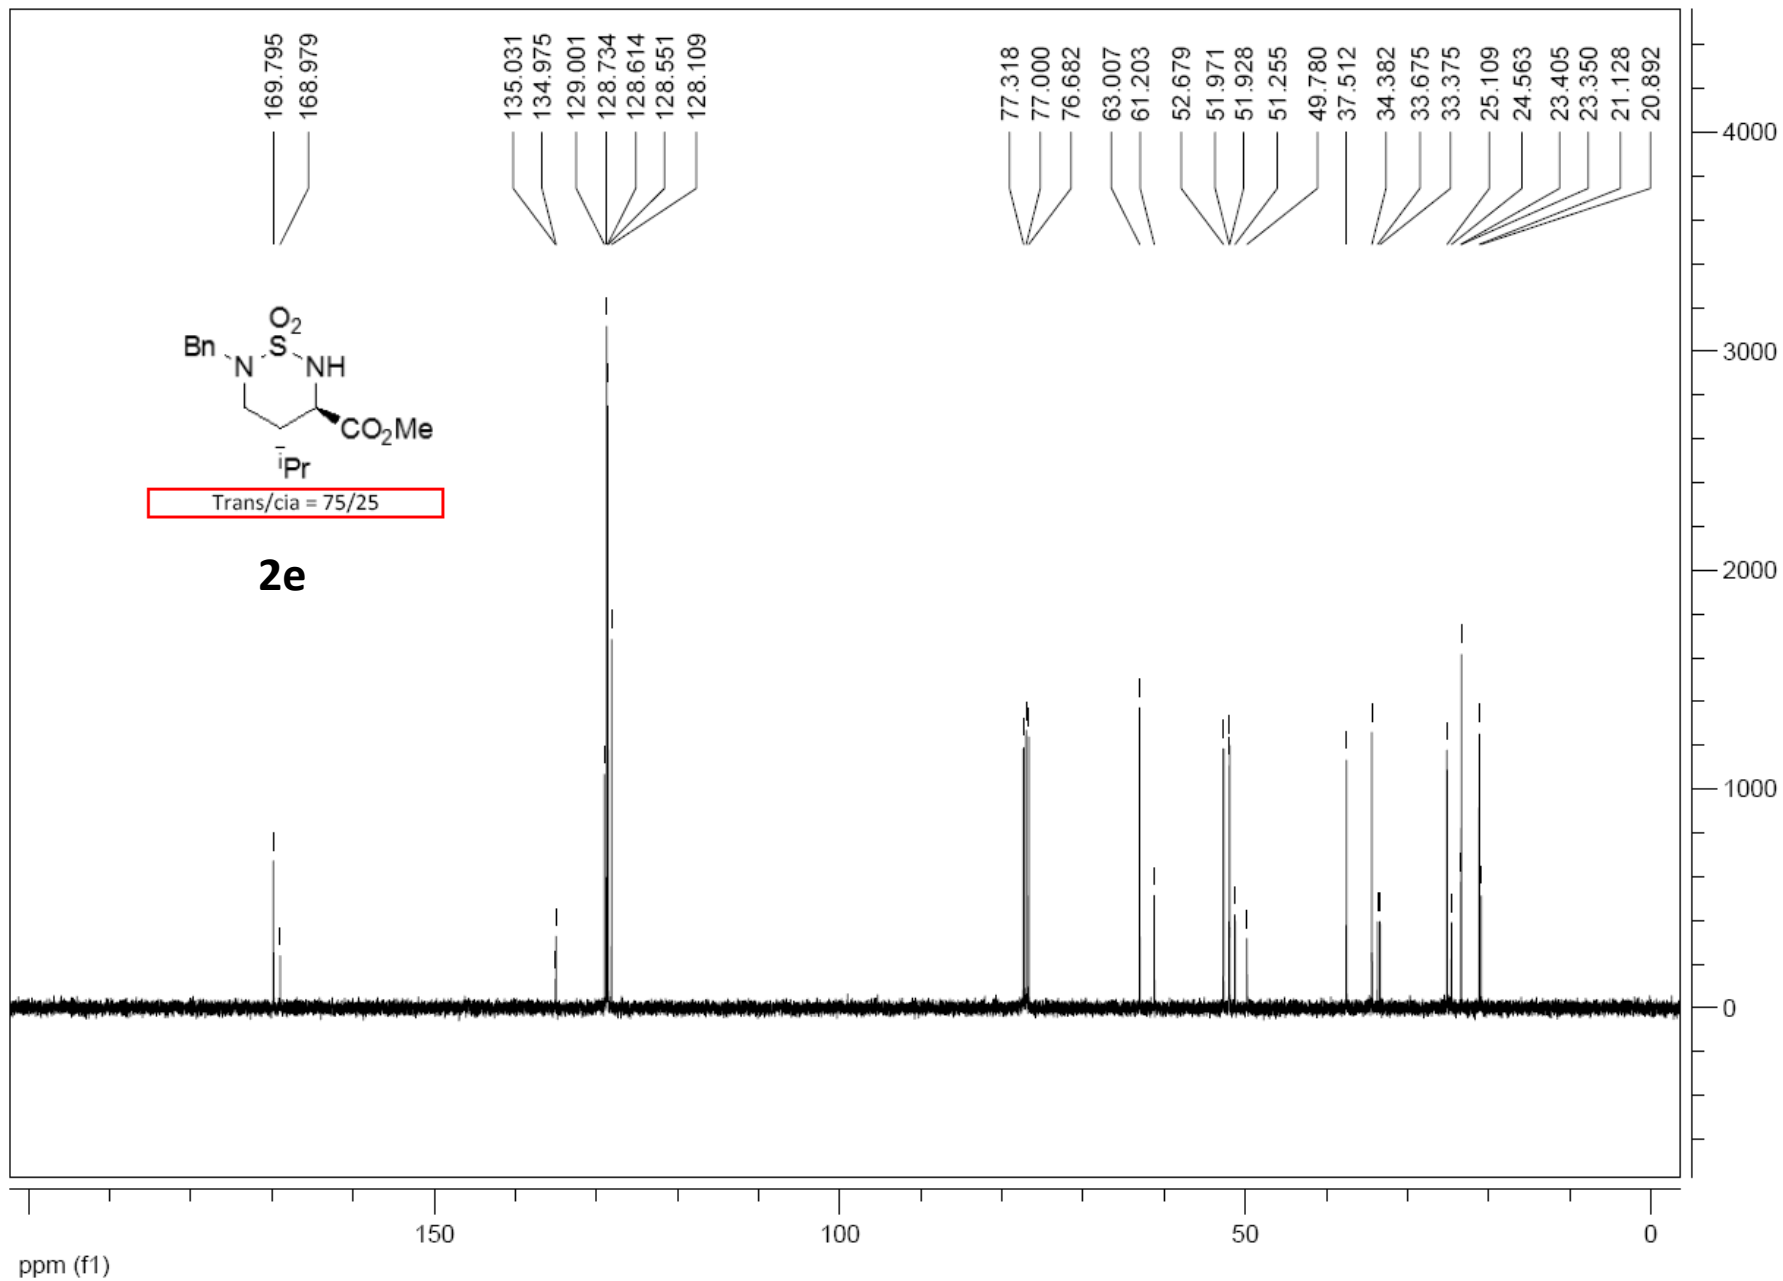

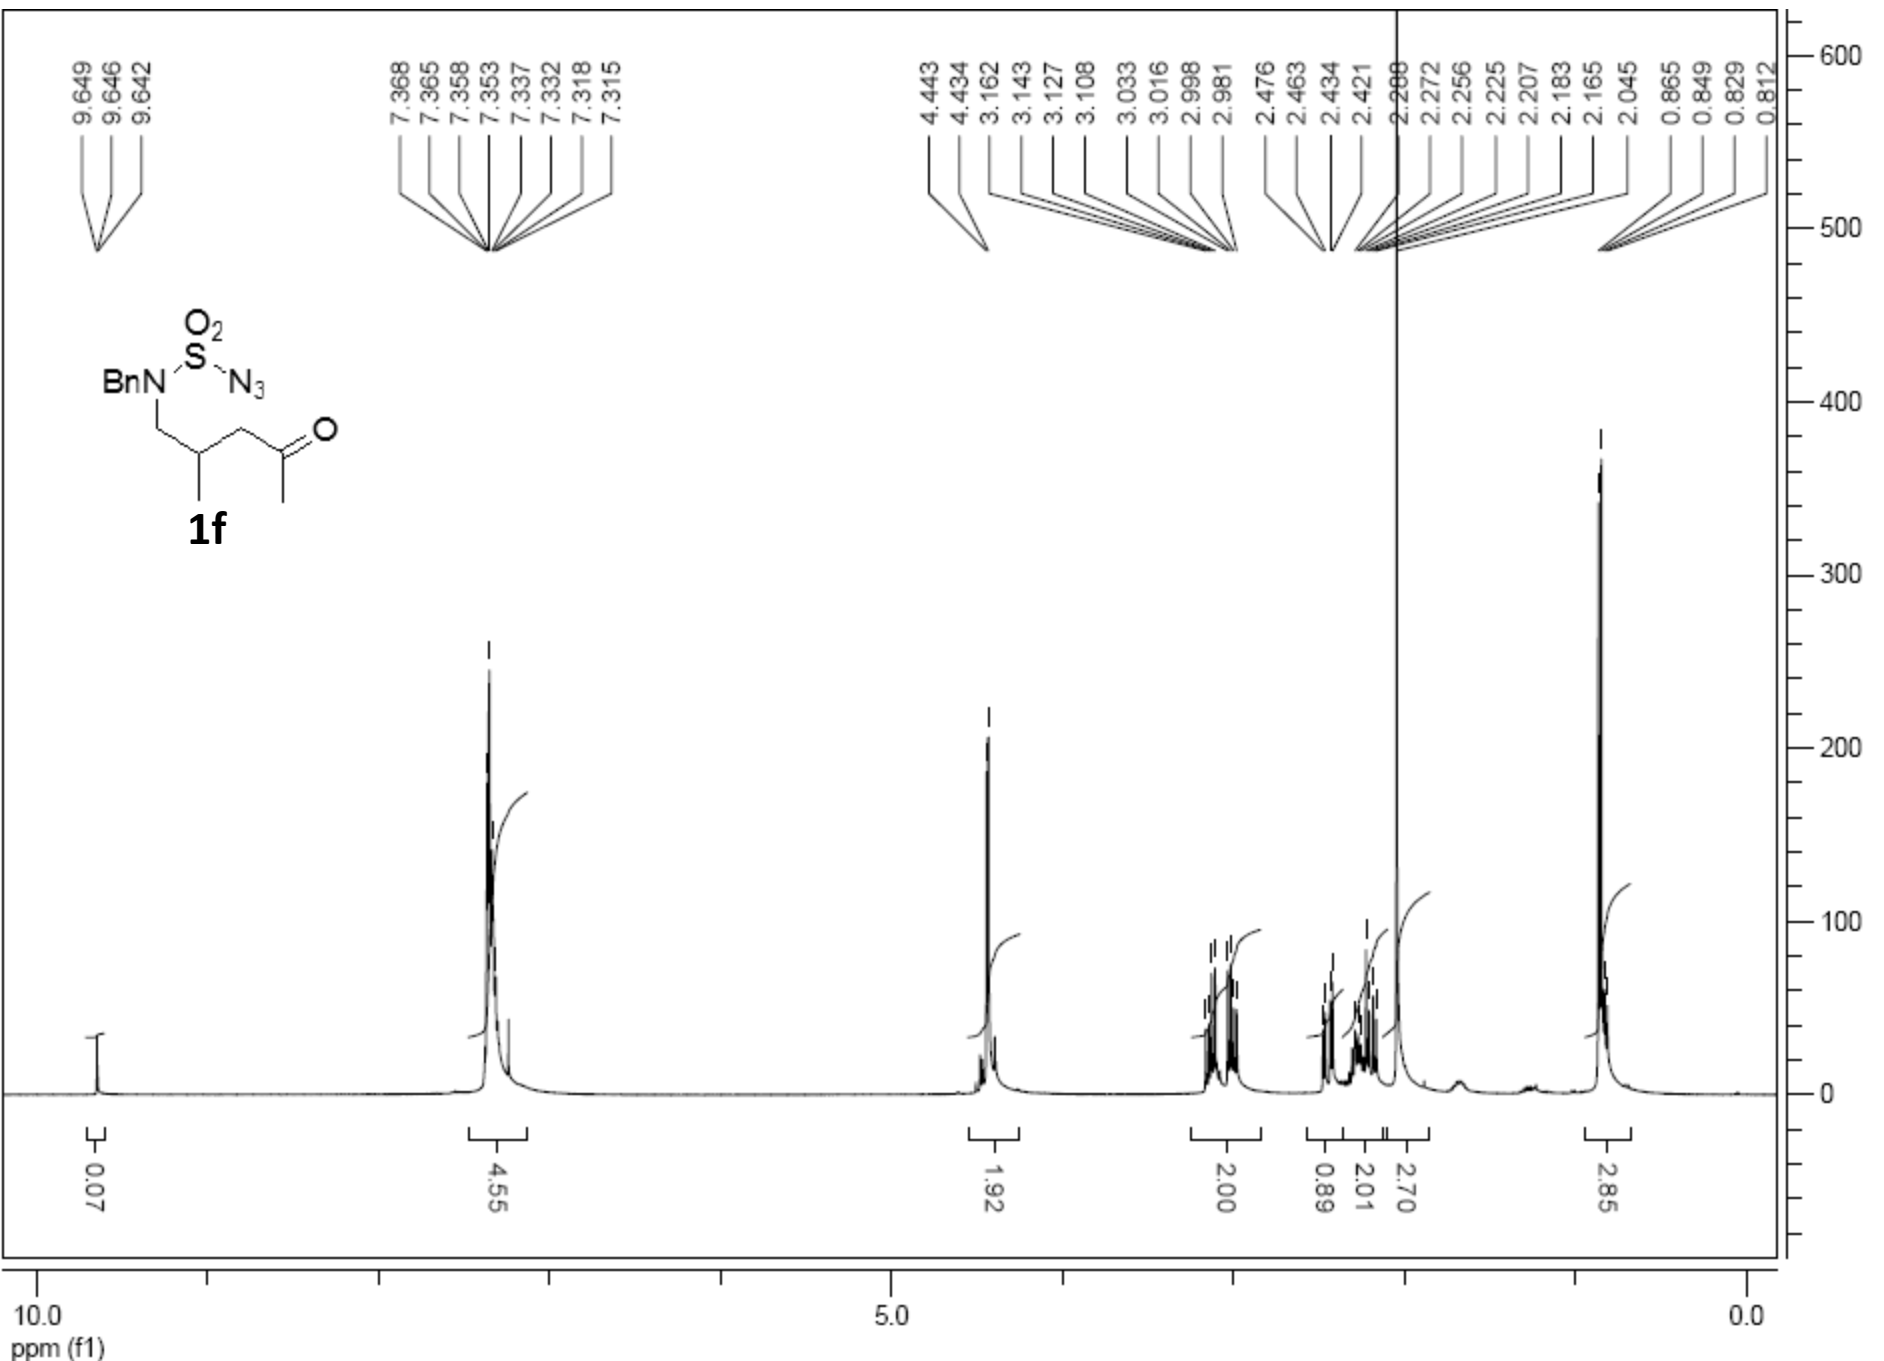

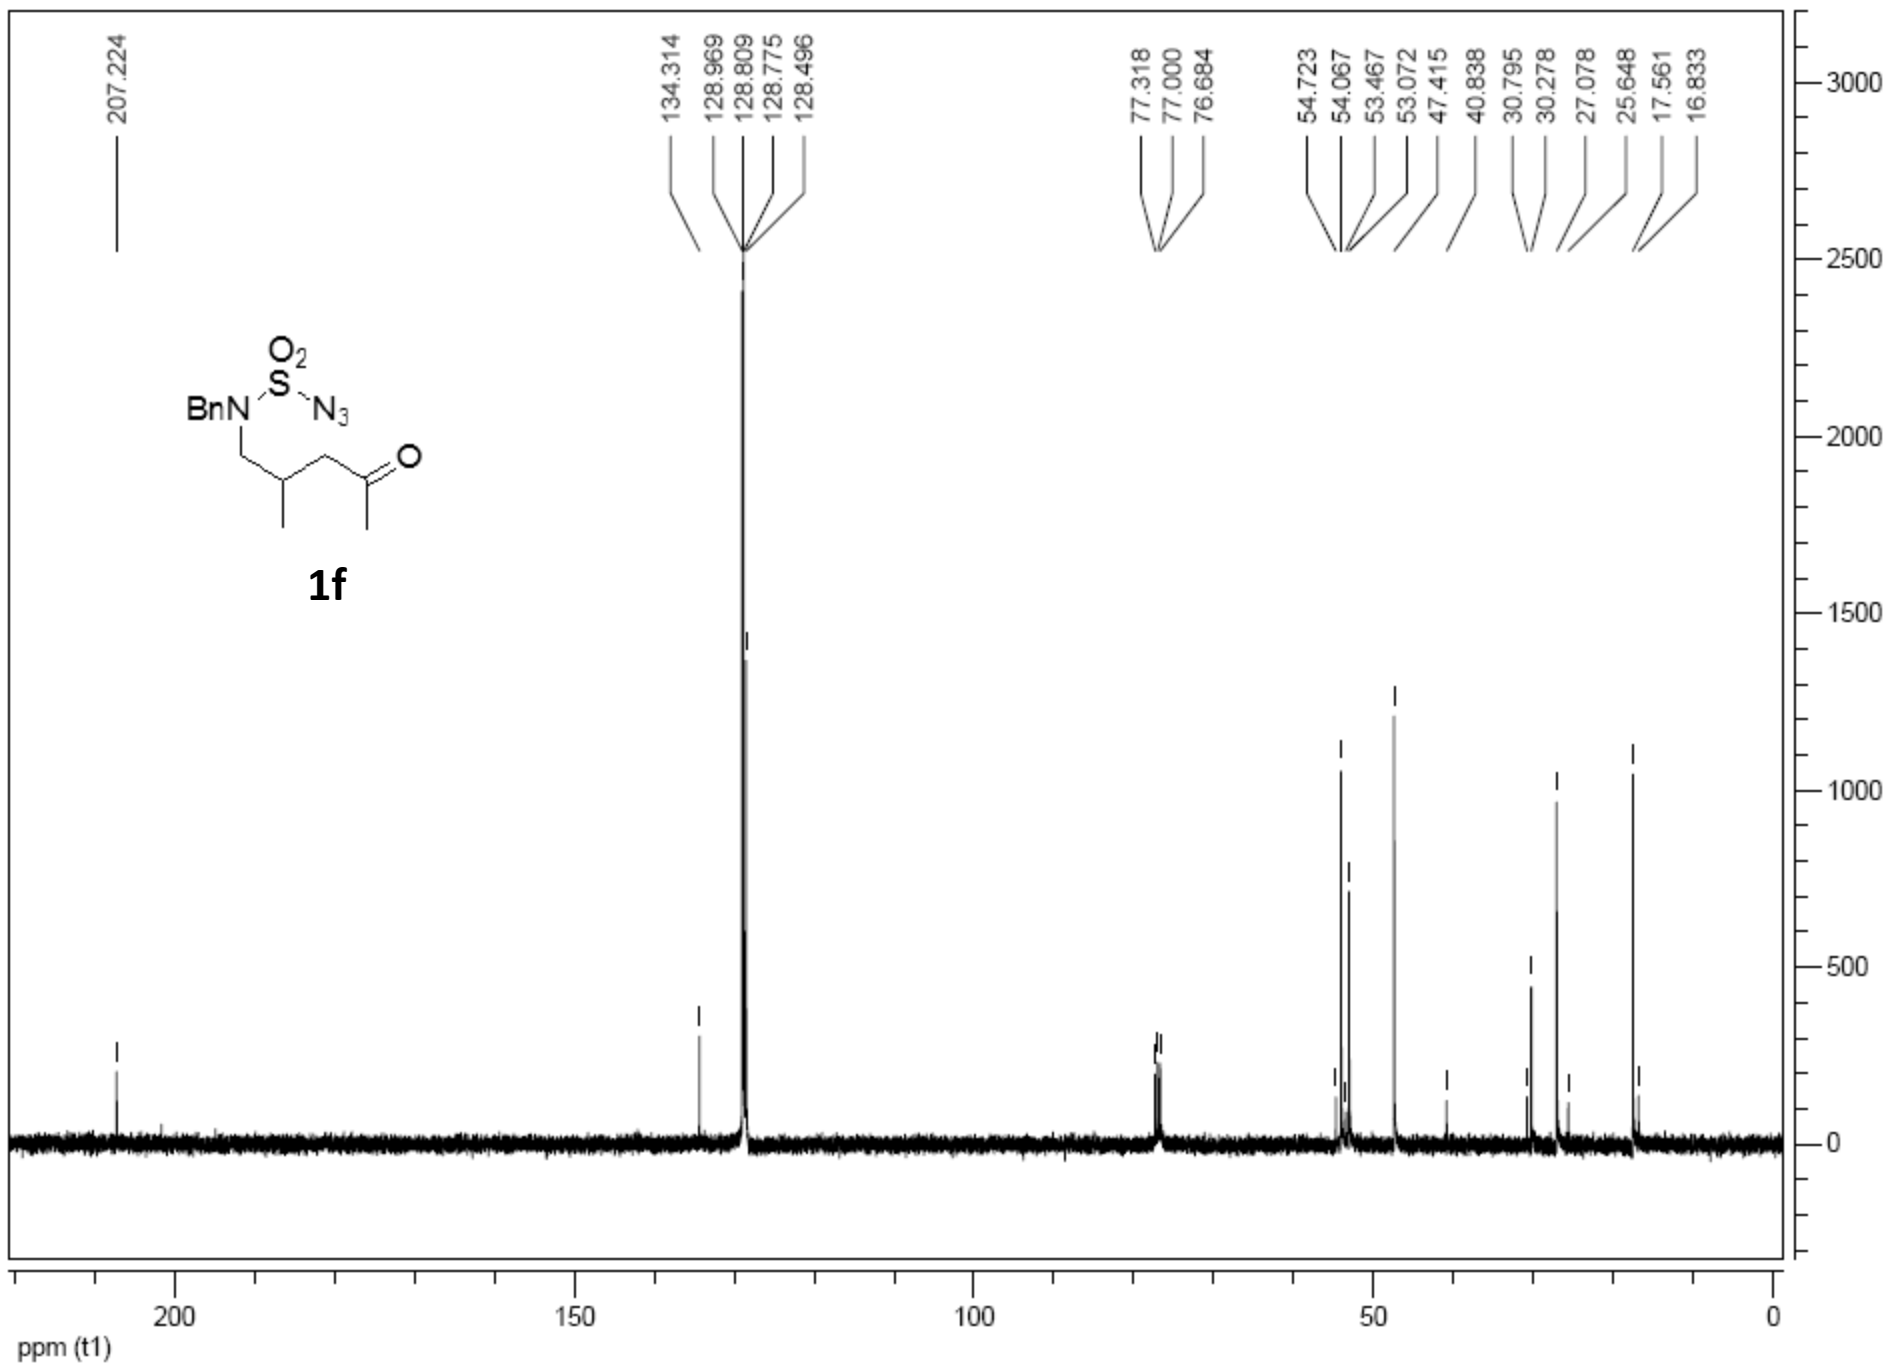



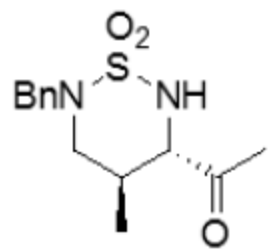

2f (major)

7.342  
7.327  
7.315  
7.304  
7.297  
7.286  
7.240

4.532  
4.506  
4.470  
4.435  
4.122  
4.097  
4.071  
3.944  
3.909  
3.045  
3.019  
3.013  
2.986  
2.979  
2.953  
2.941  
2.316  
1.959  
1.955  
1.942  
1.934  
1.929  
1.916  
0.890  
0.873

4.69

1.98

1.02

0.93

2.05

3.00

1.02

3.14

1500

1000

500

0

5.0

ppm (f1)

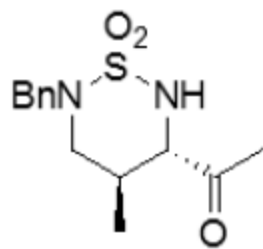

**2f (major)**

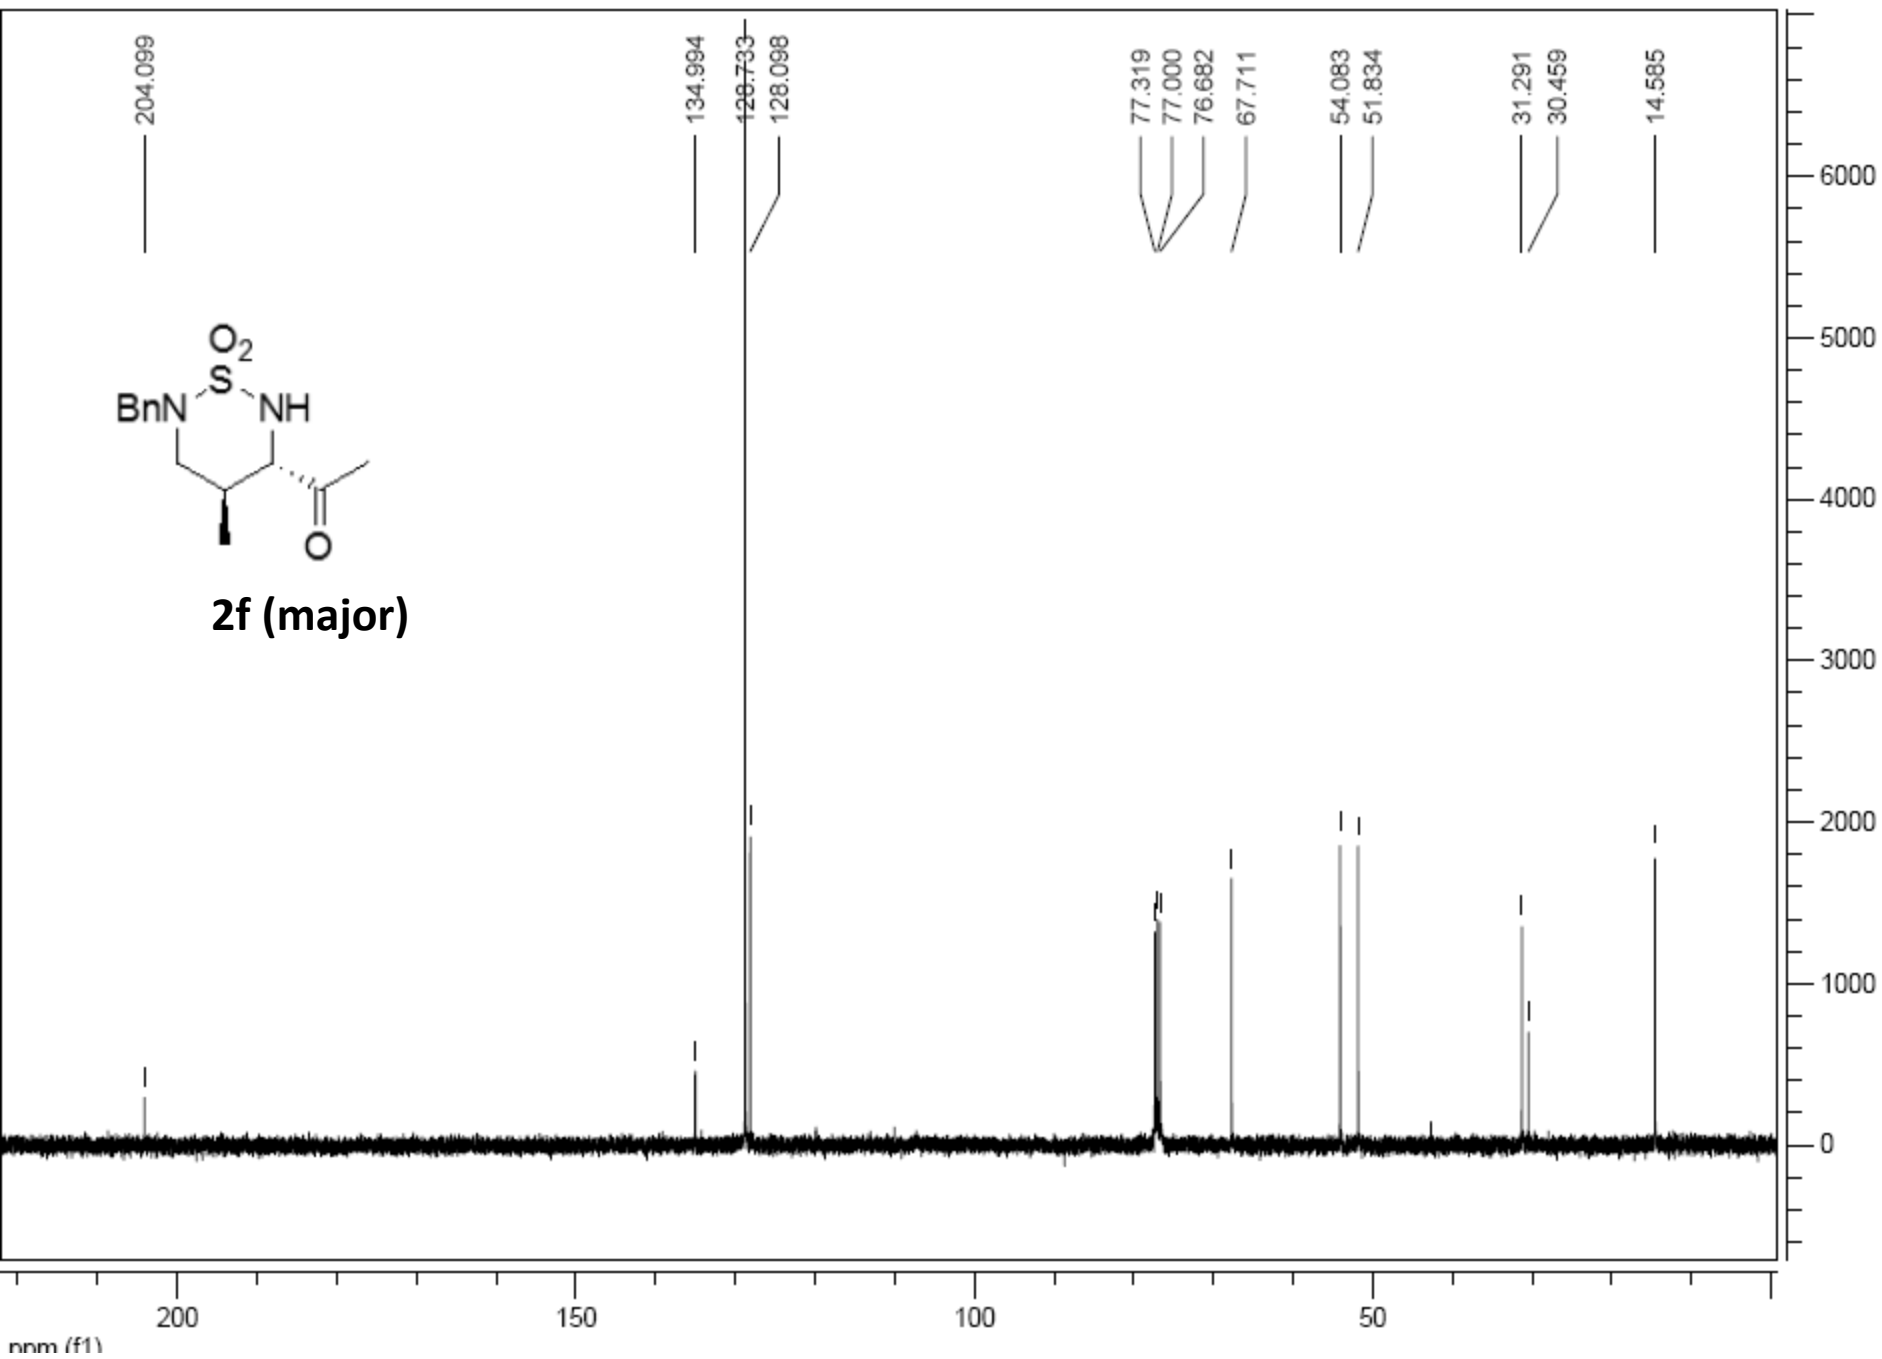

Crystal Structure of **2f**(major)

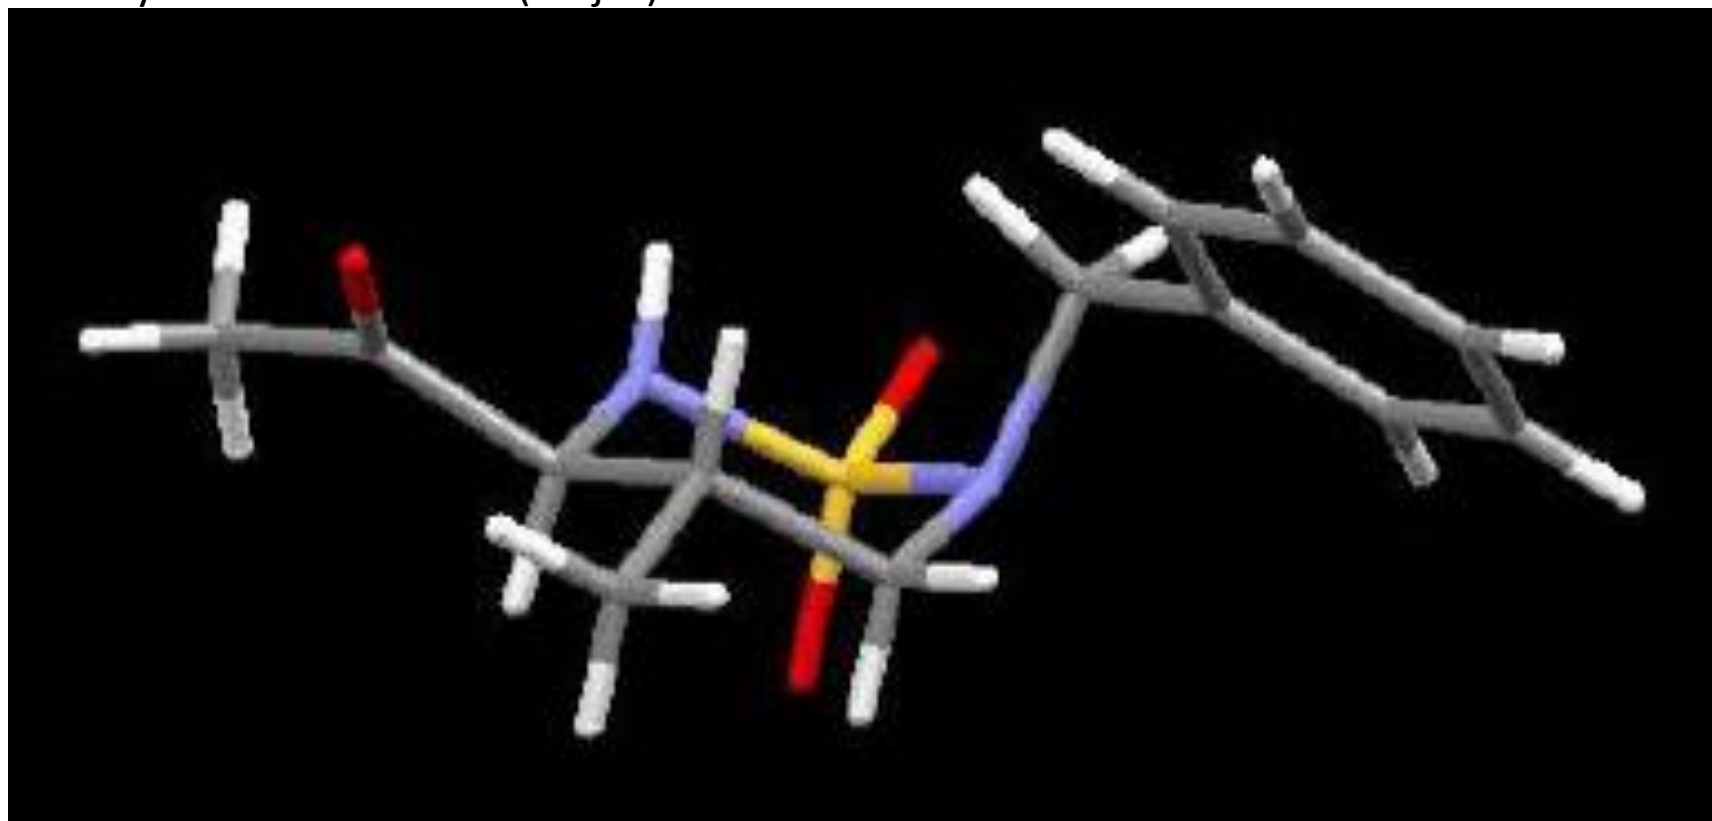

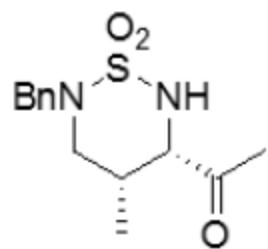

**2f (minor)**

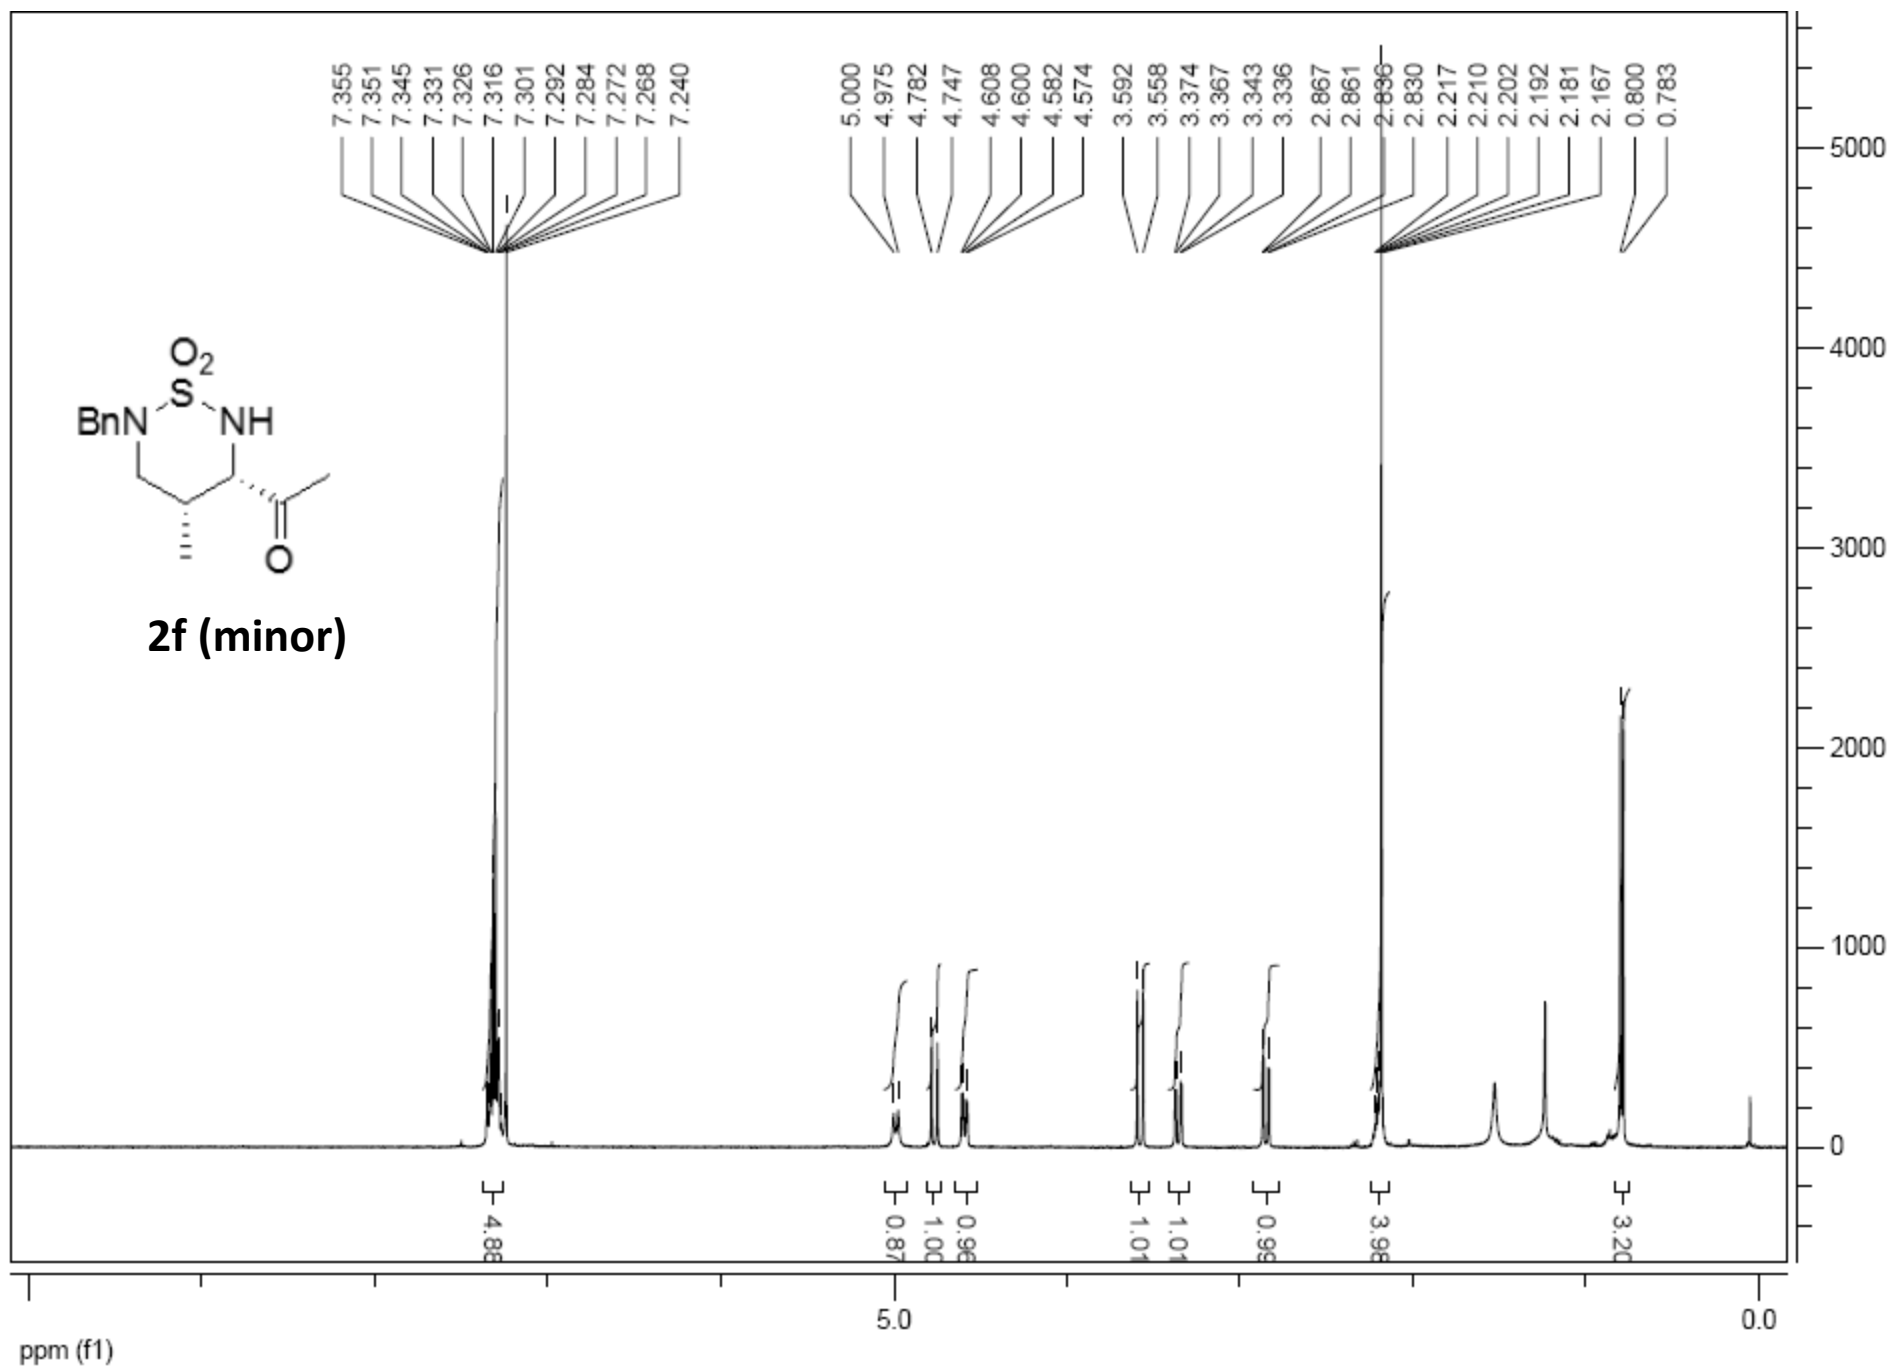

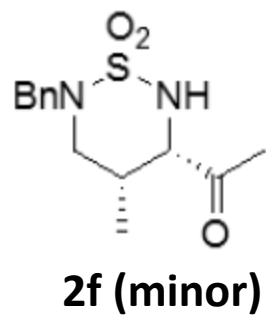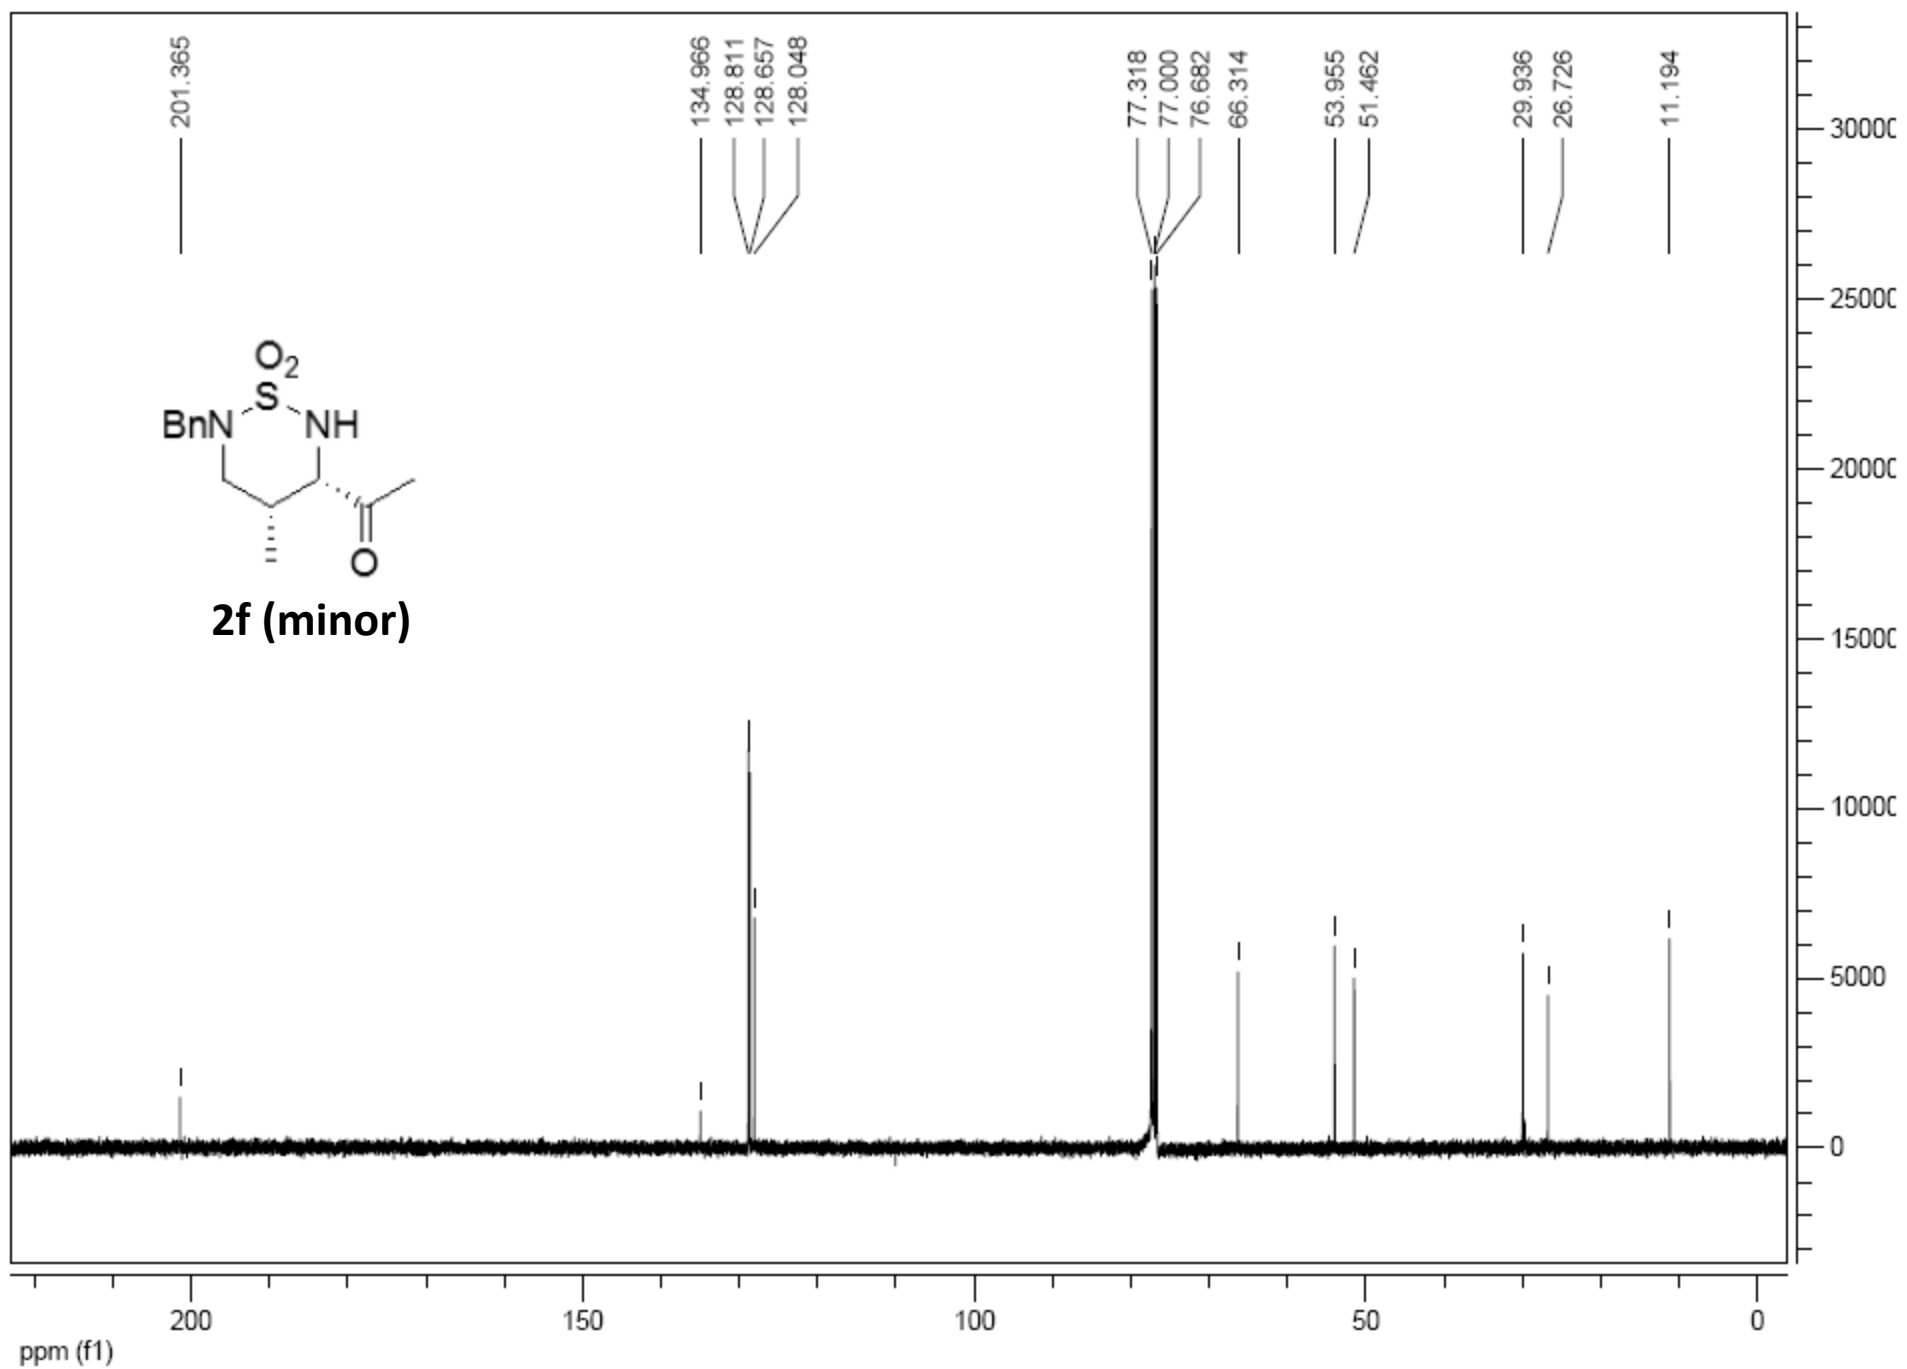

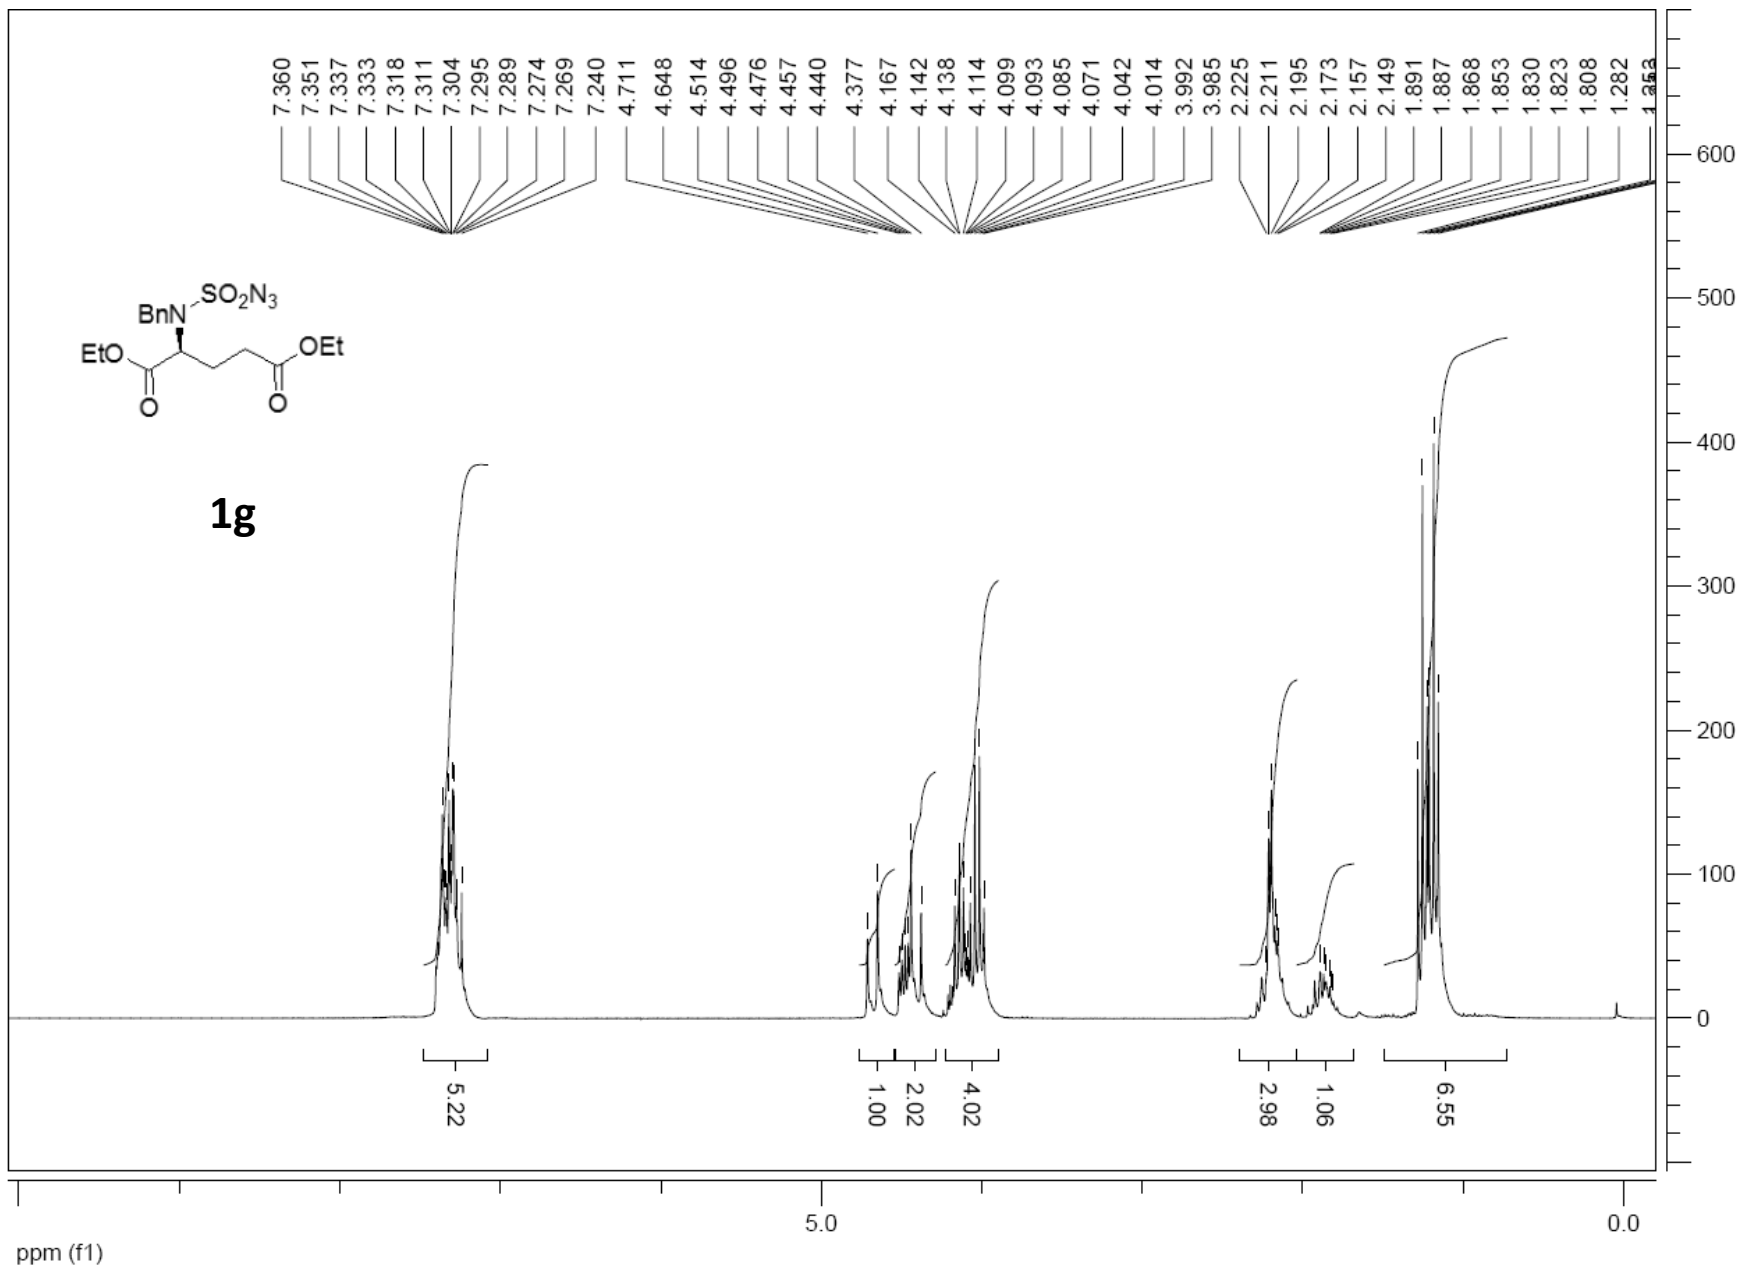

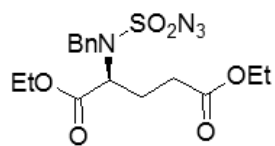

**1g**

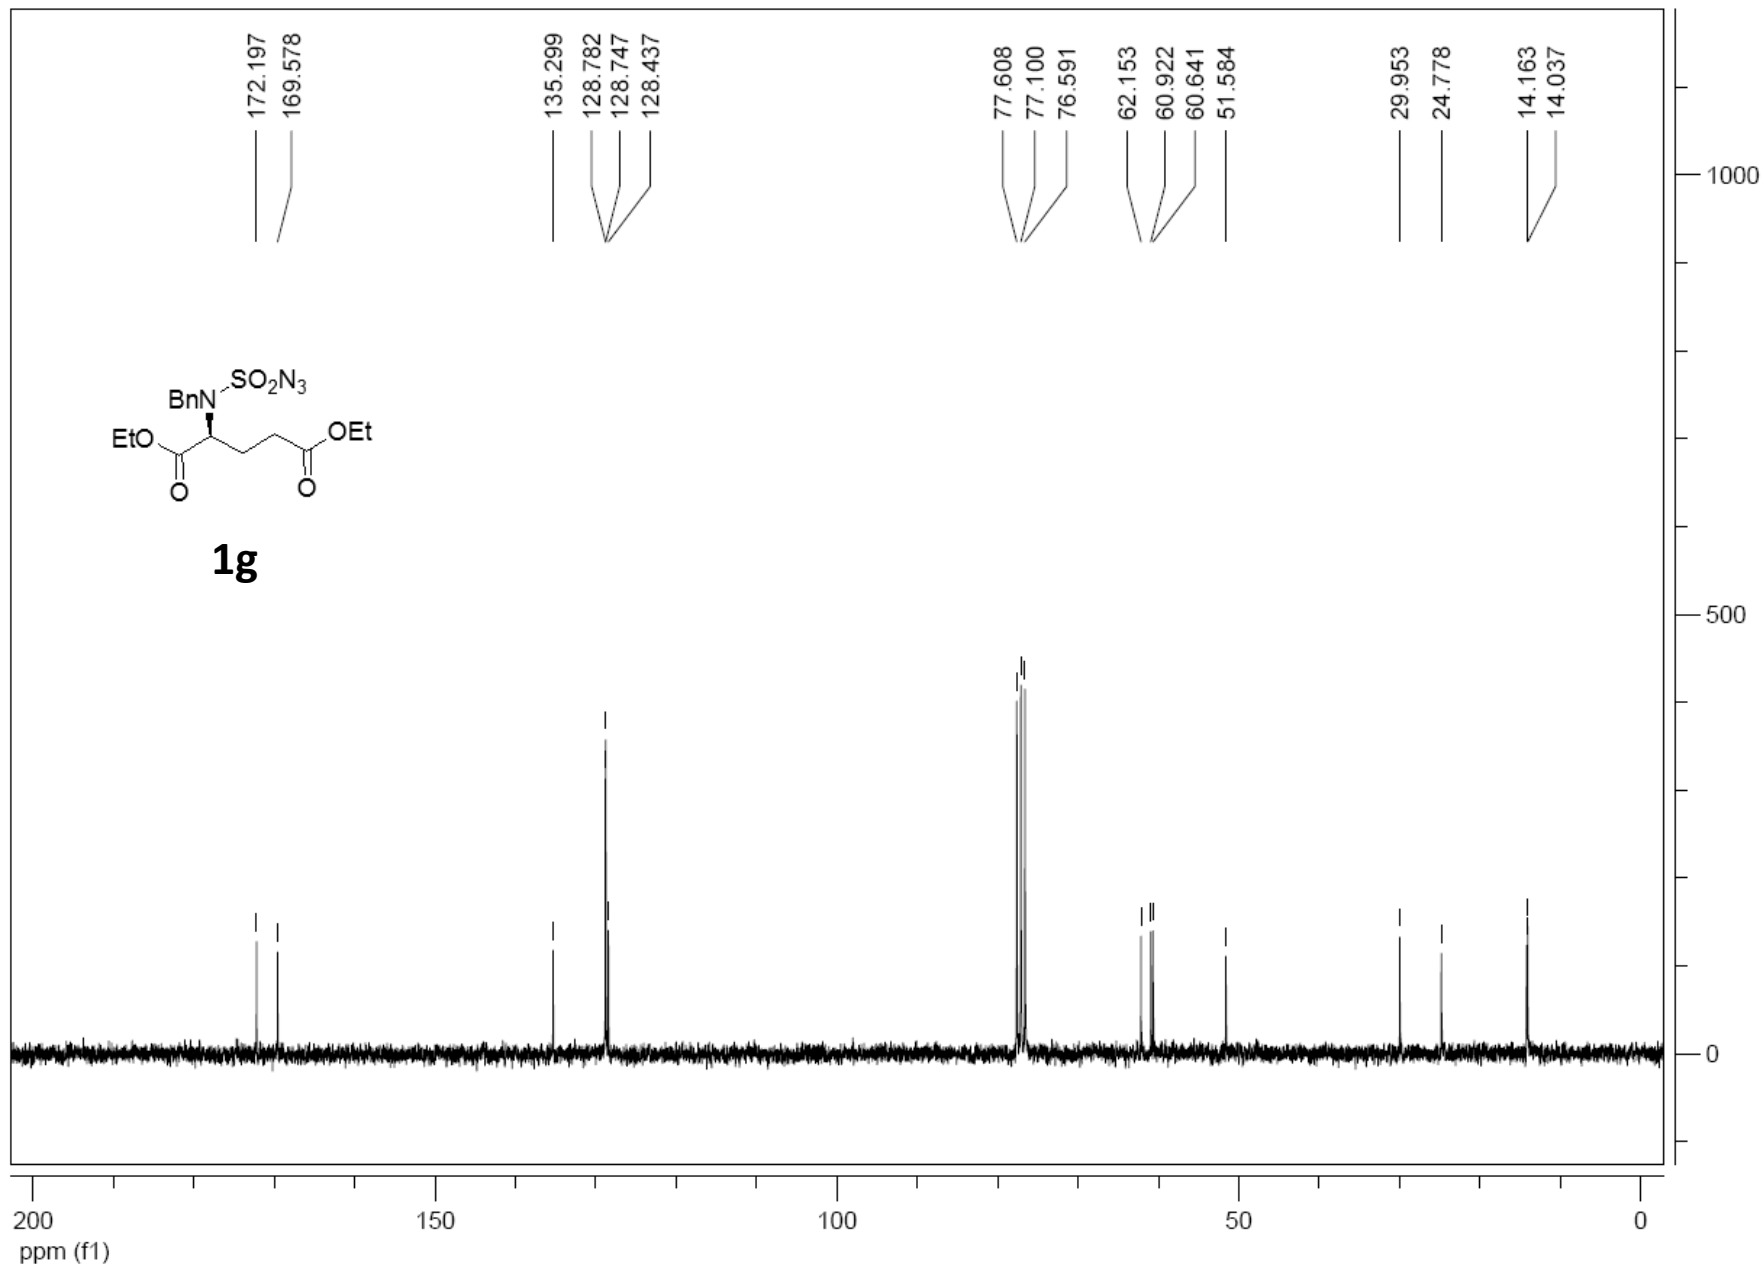

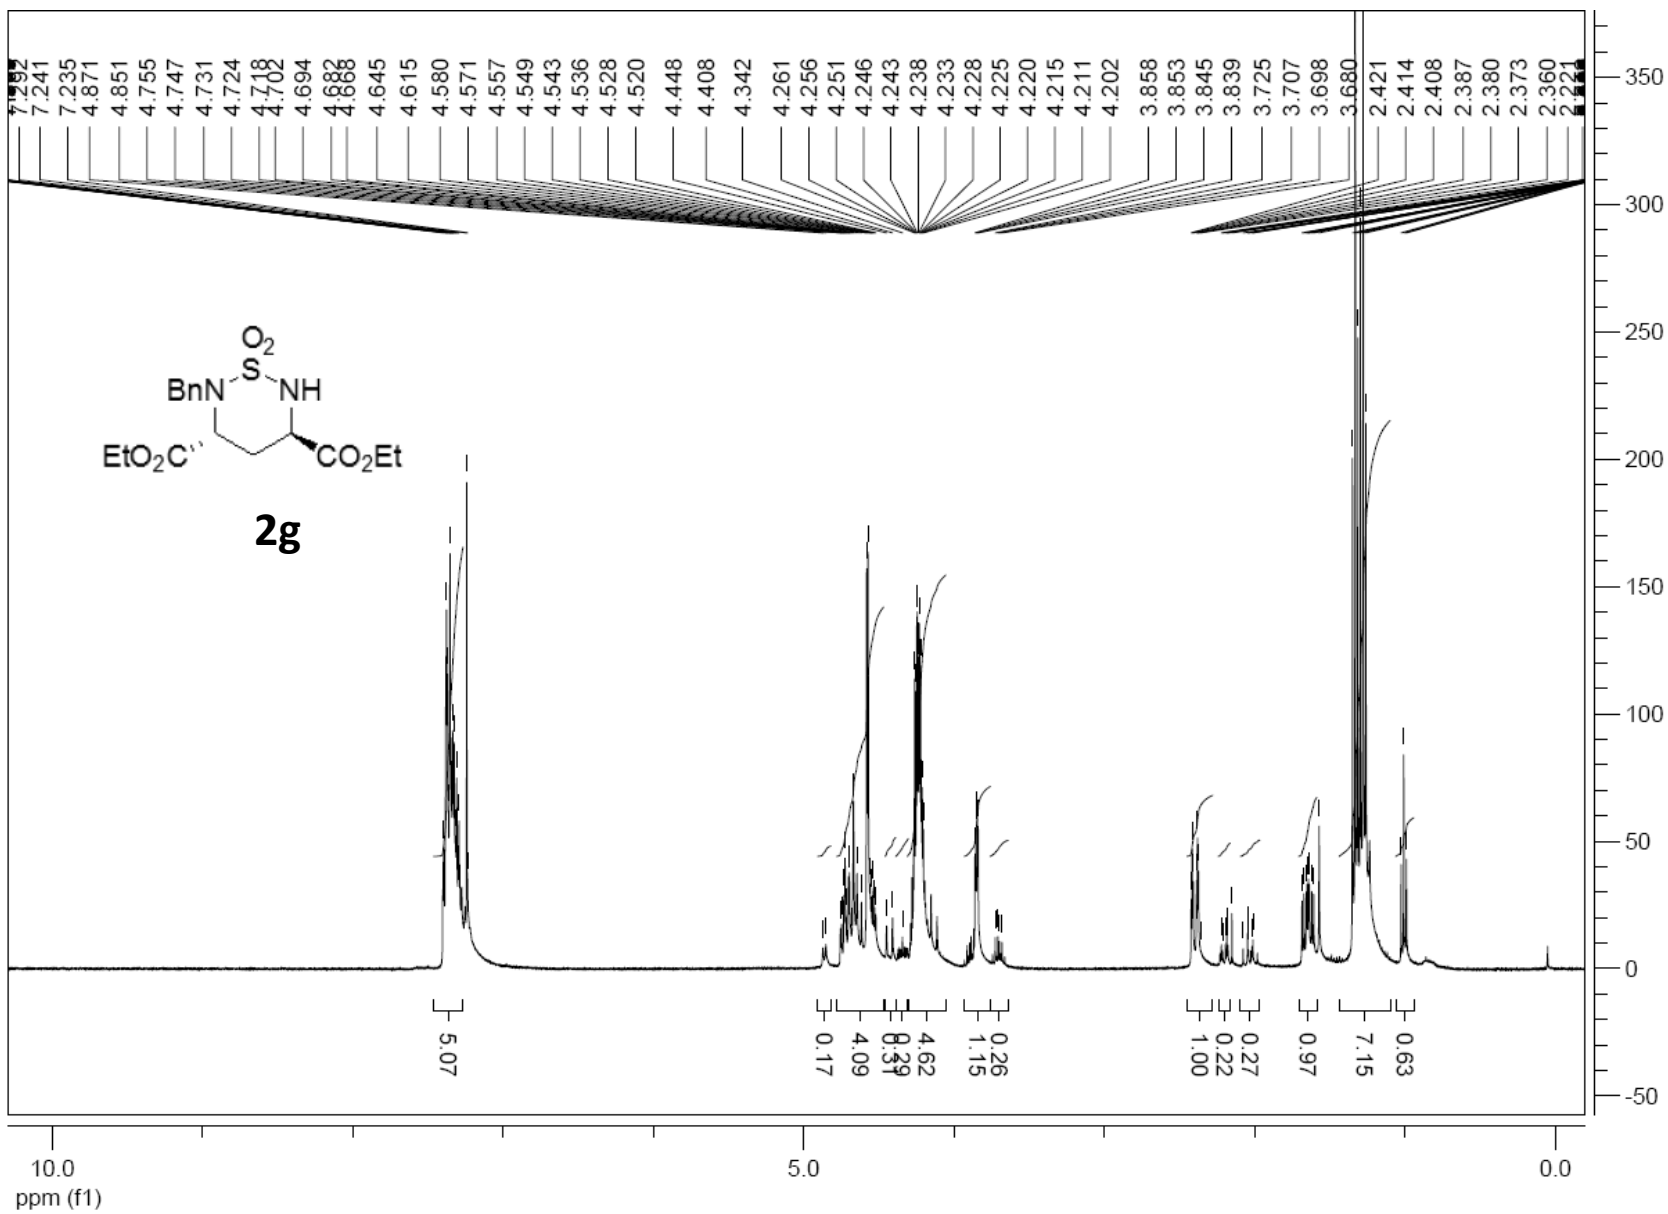



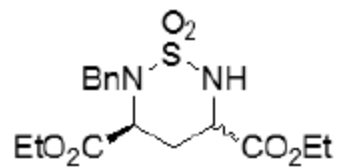

**2g**

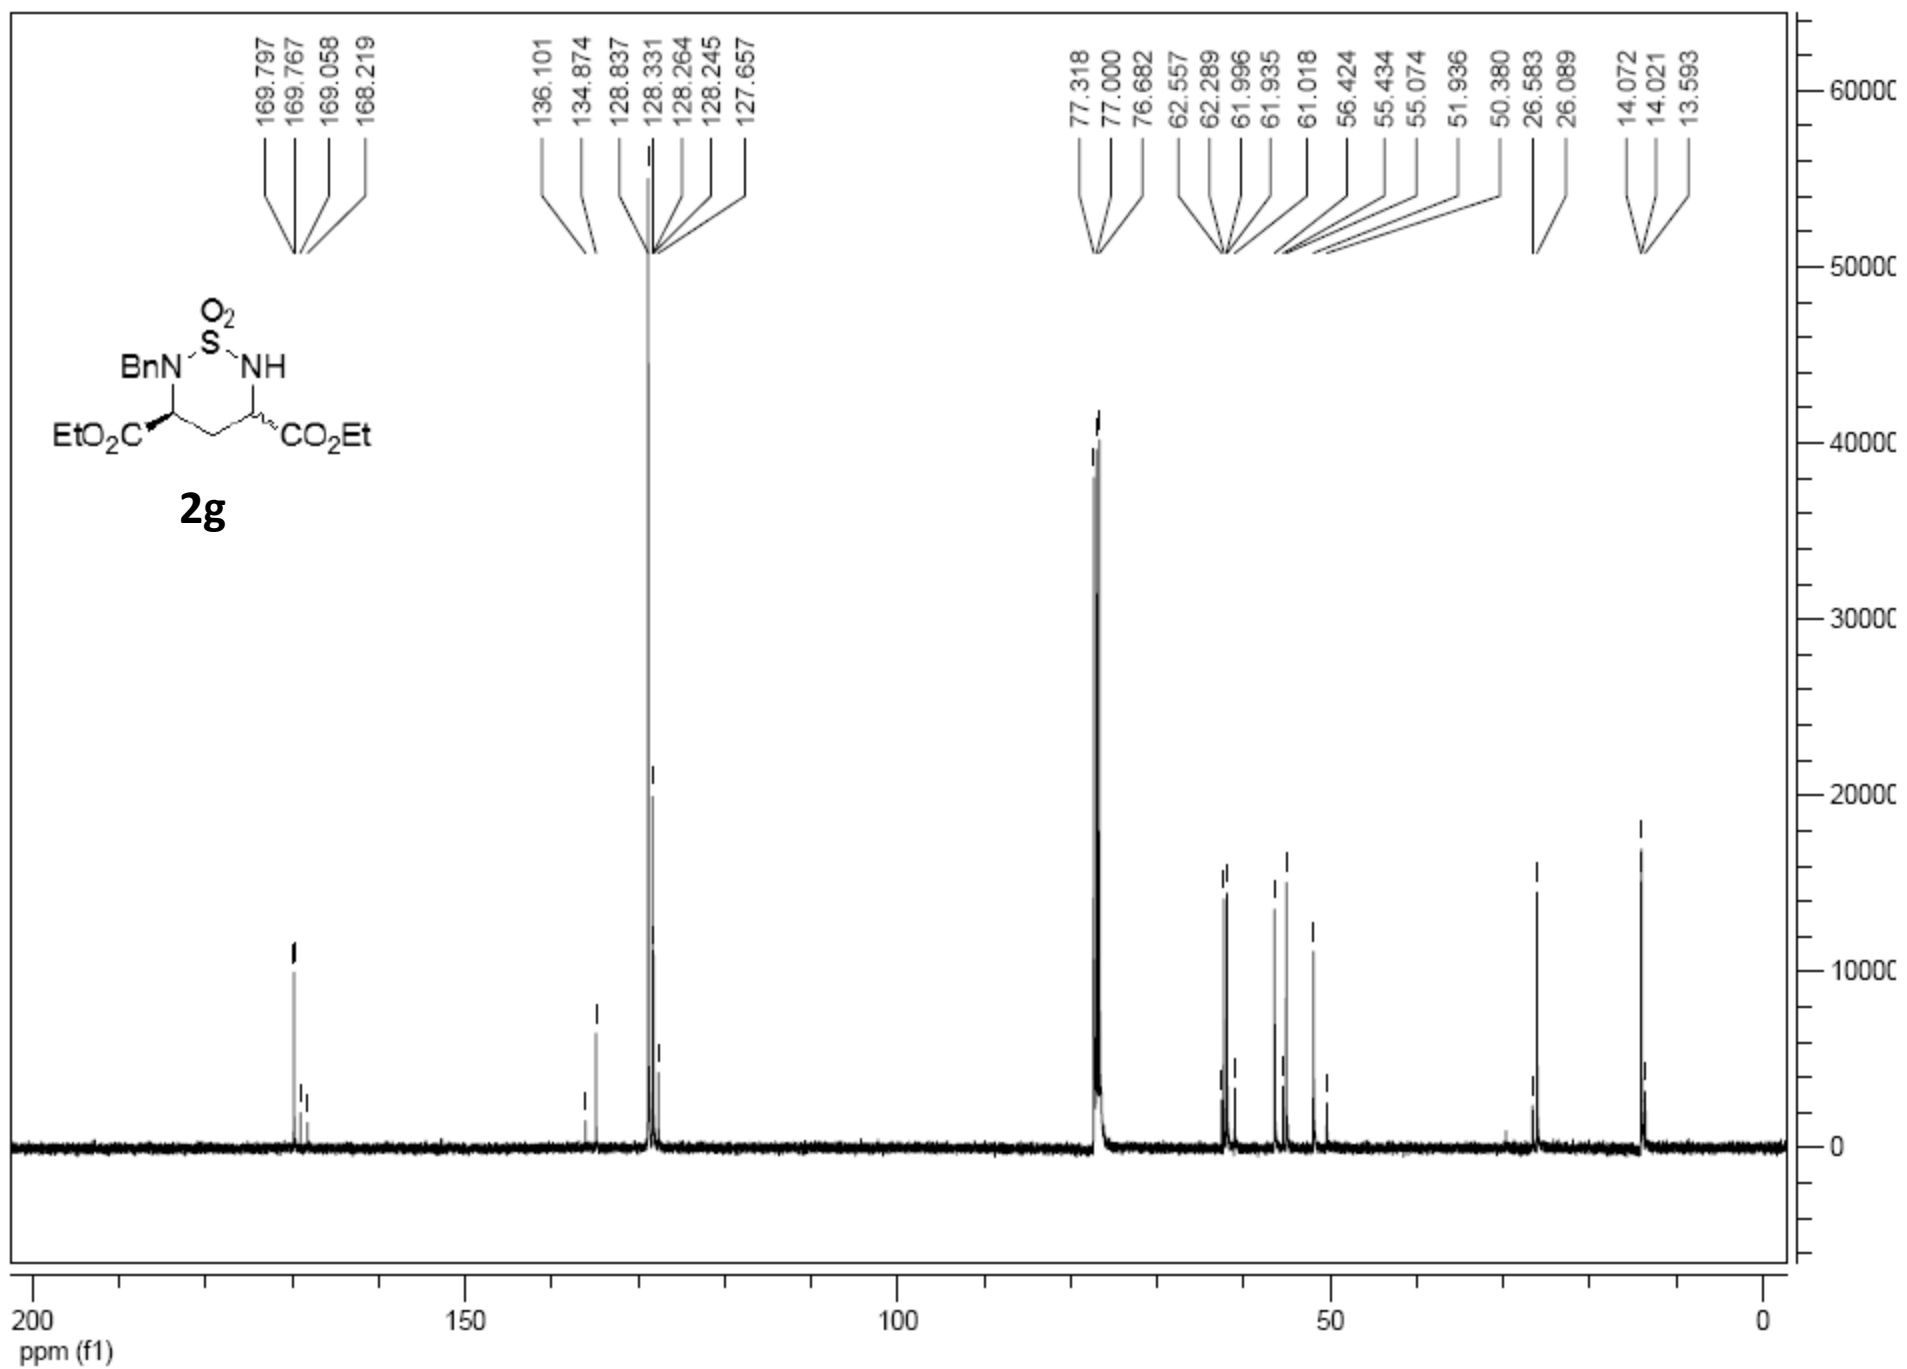

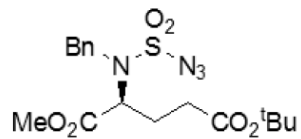

**1h**

7.391  
7.372  
7.341  
7.325  
7.305  
7.298  
7.280  
7.263  
7.243

4.703  
4.664  
4.561  
4.554  
4.548  
4.537  
4.524  
4.446  
4.406  
3.680

2.208  
2.197  
2.192  
2.183  
2.173  
2.169  
2.163  
2.156  
2.143  
2.120  
2.110  
2.096  
2.088  
2.073  
1.879  
1.865  
1.850  
1.847  
1.840

4.89

1.01  
0.95  
1.00

3.00

3.06  
1.06

9.35

ppm (f1)

5.0

0.0

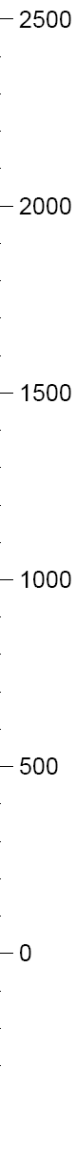

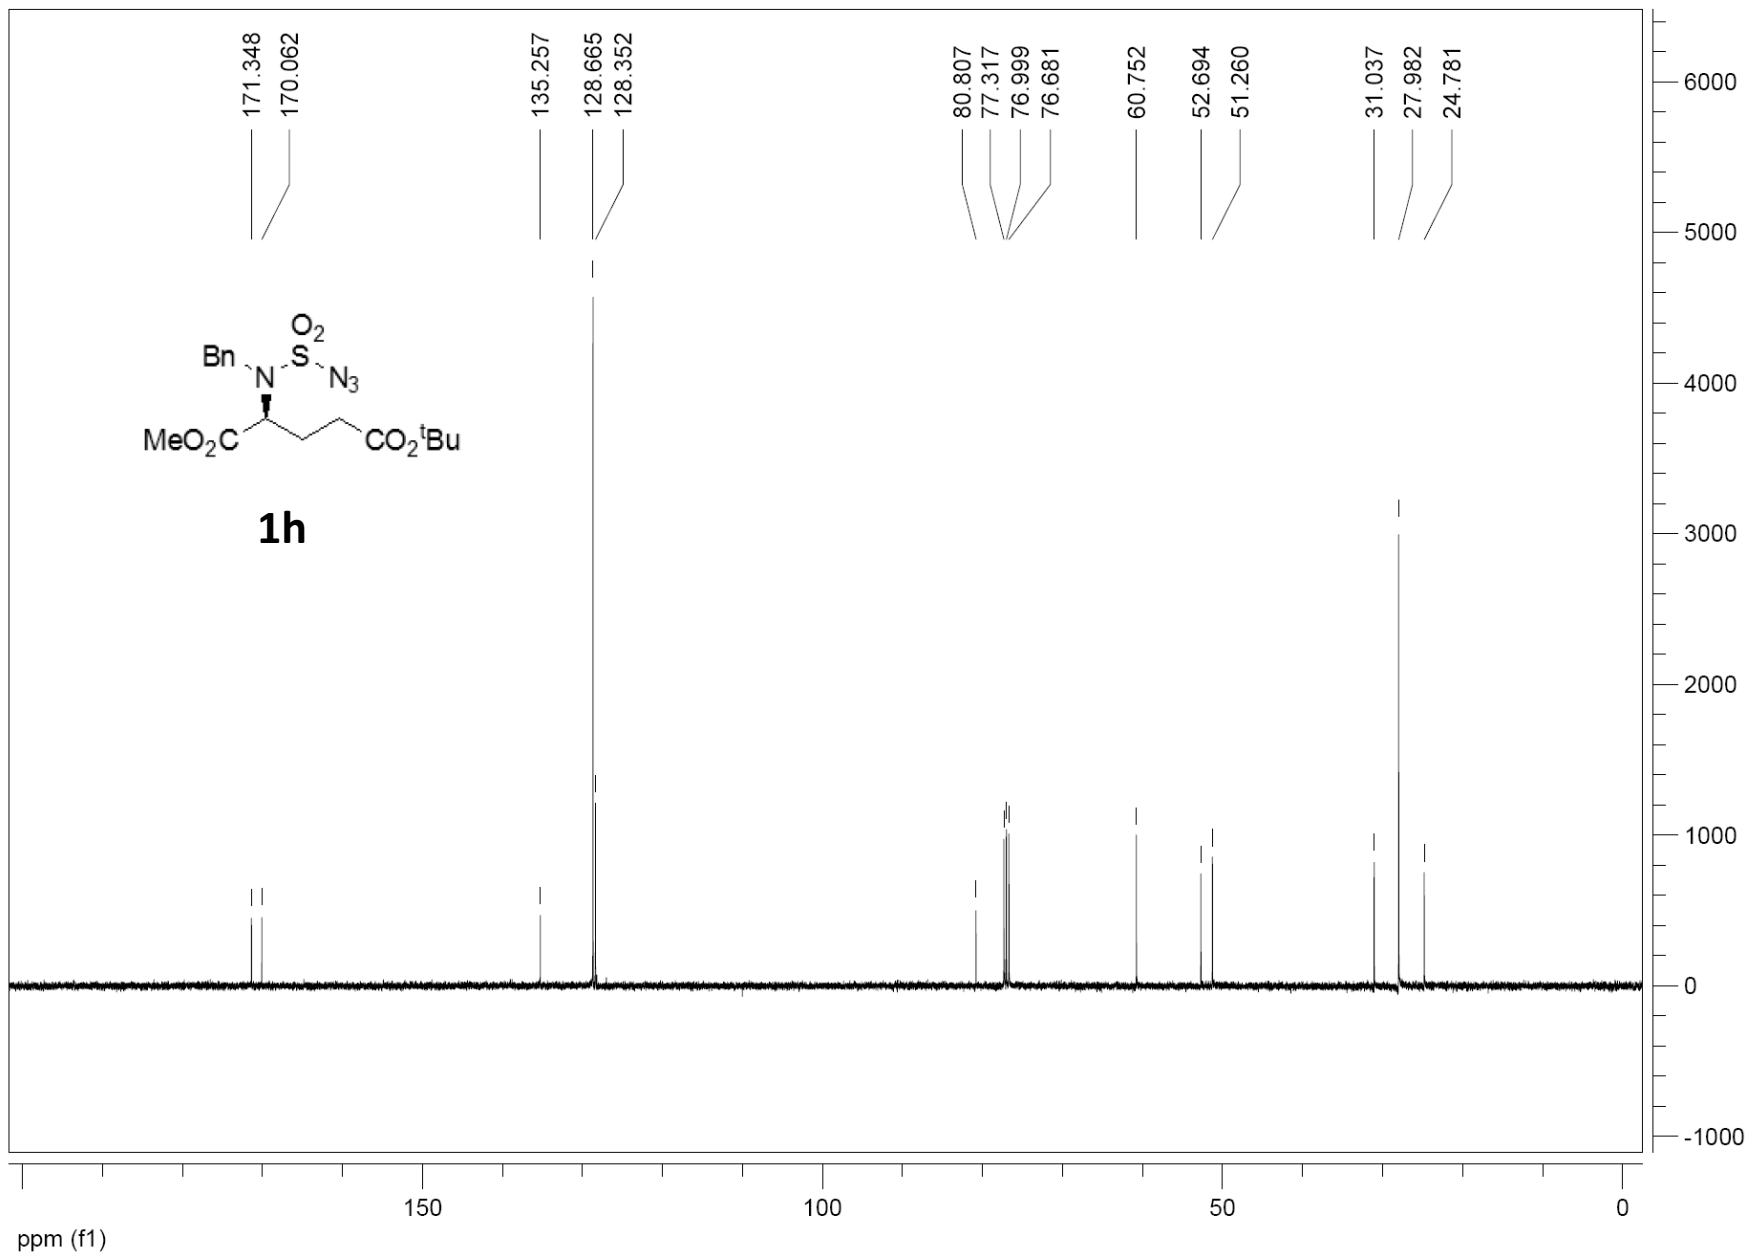

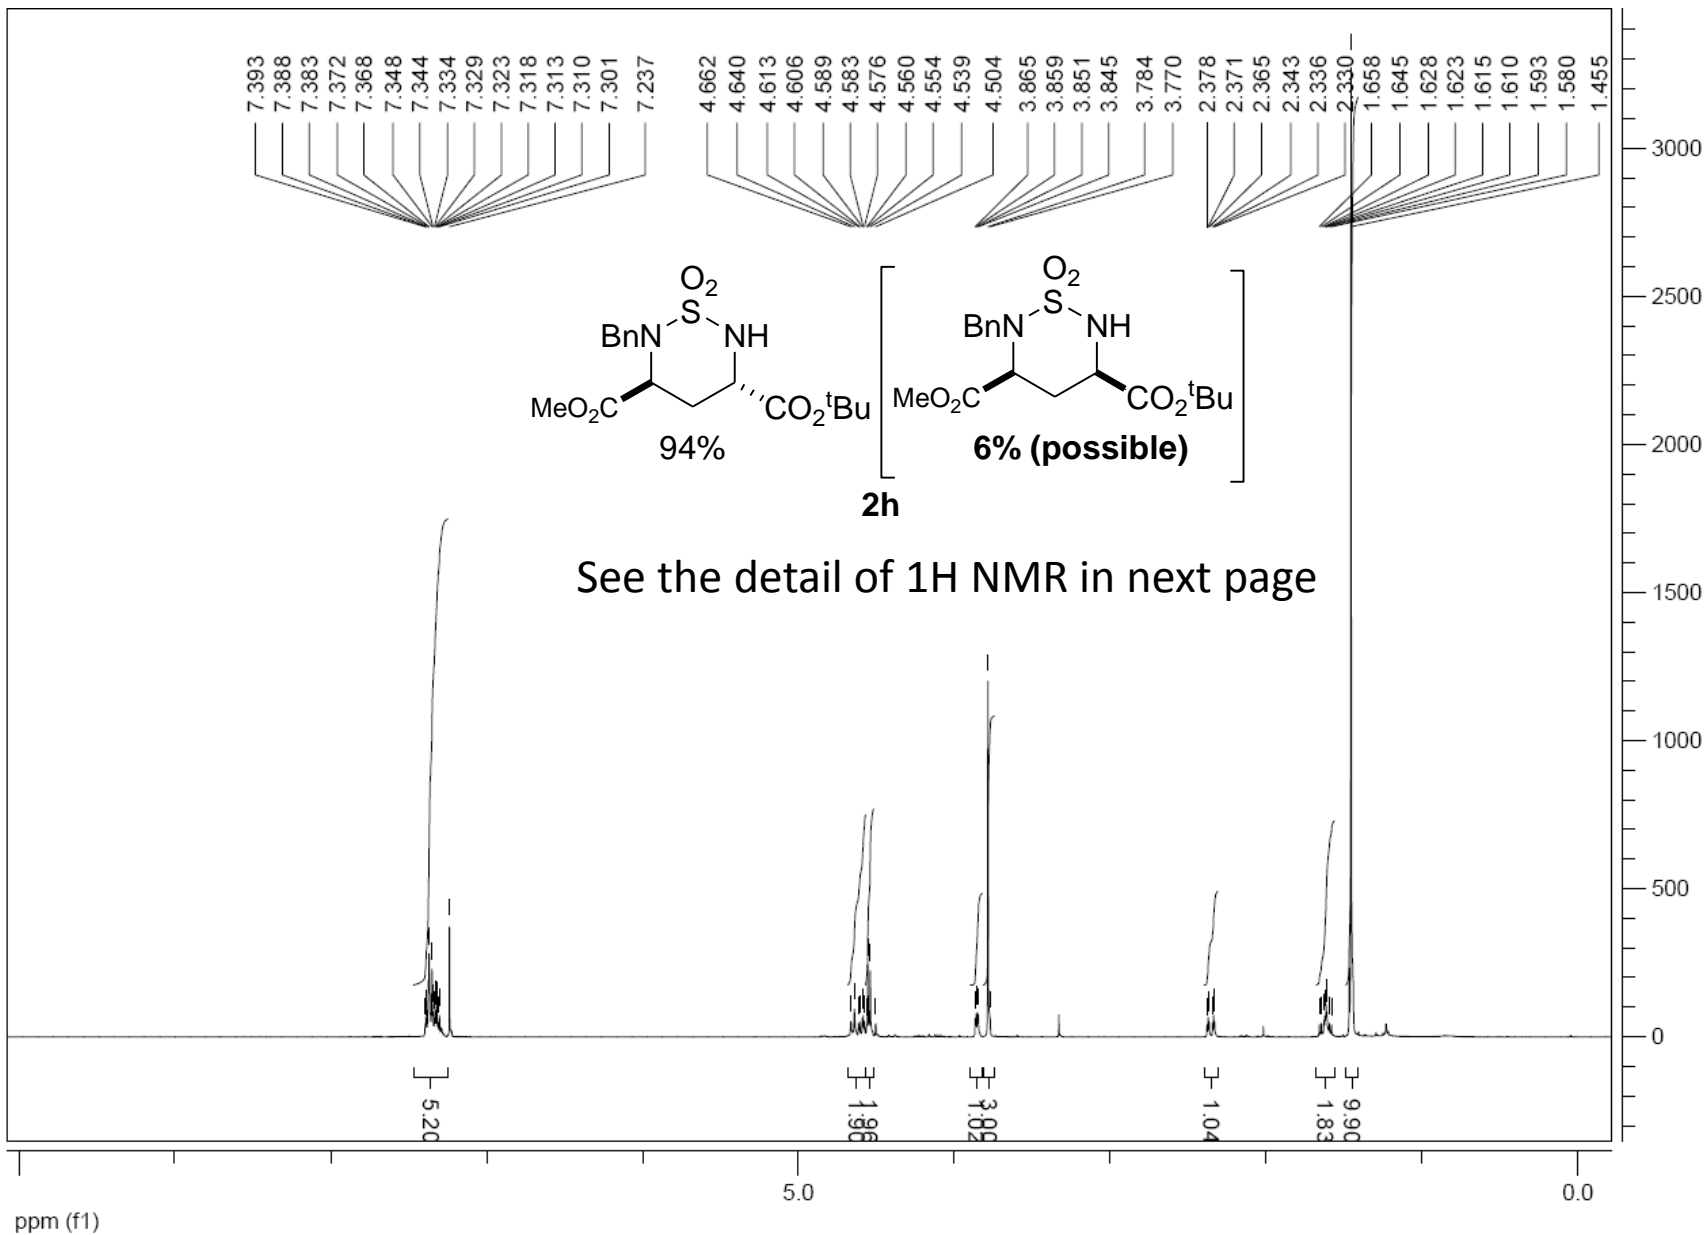

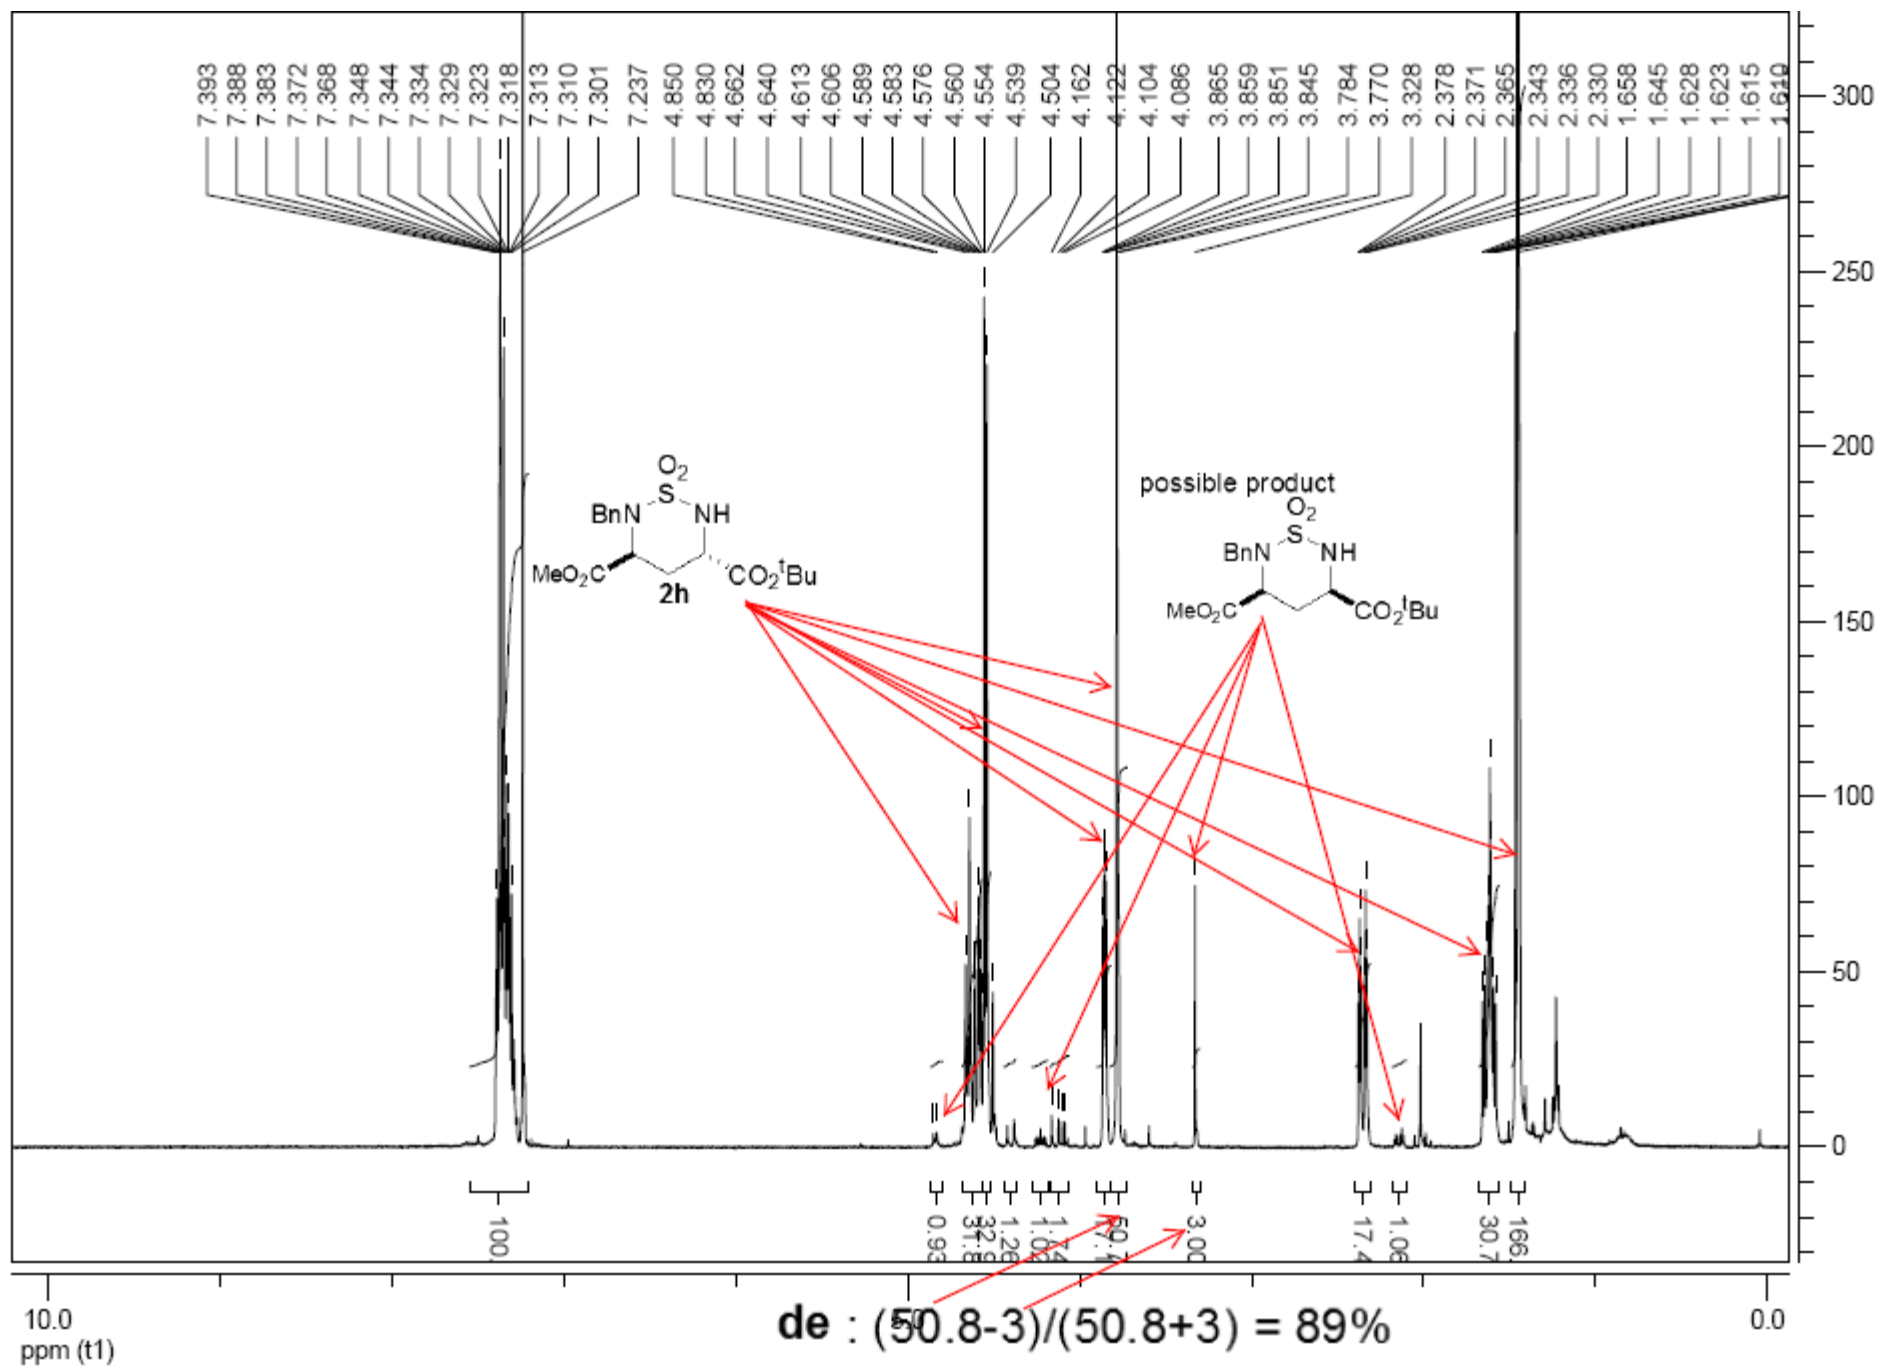

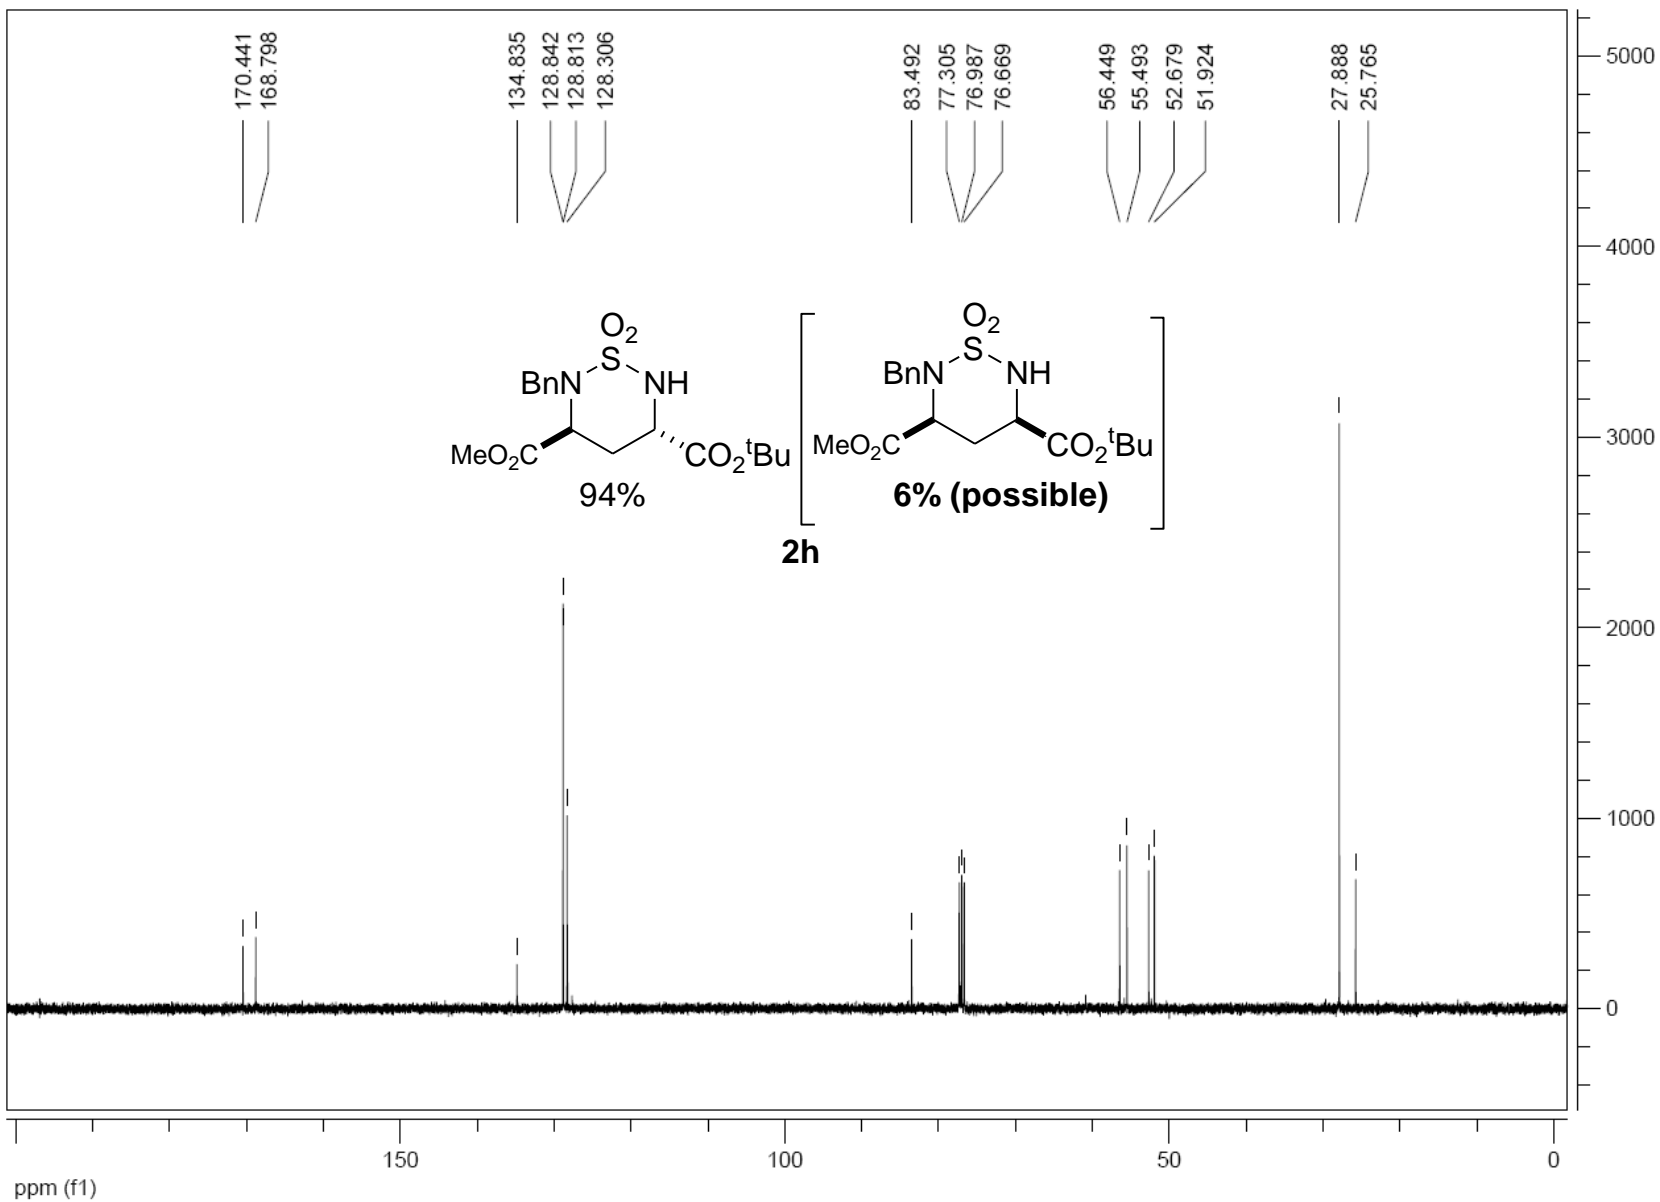

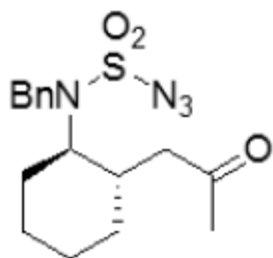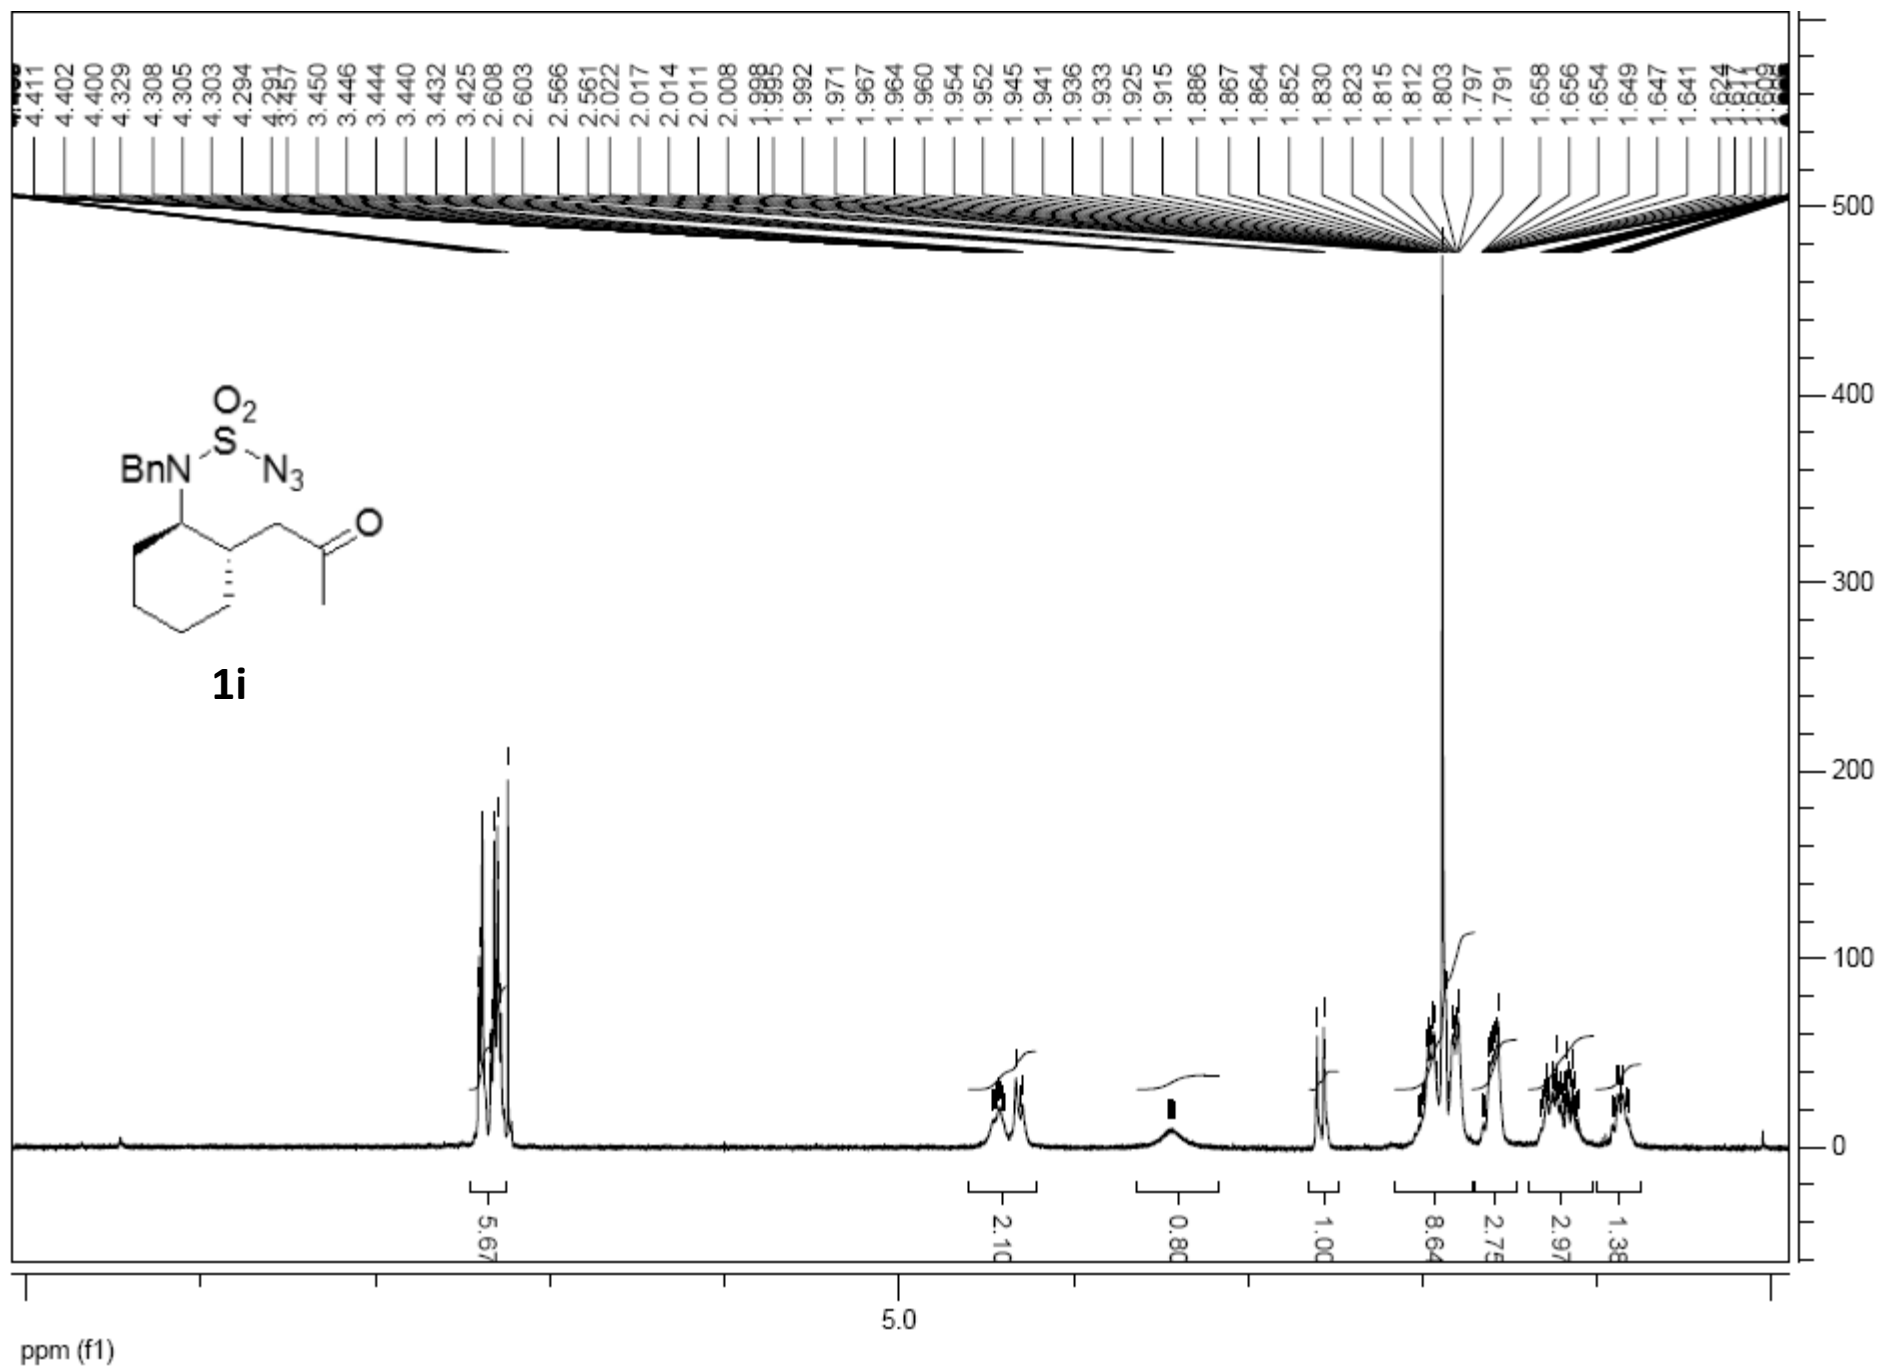

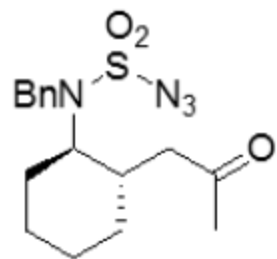

**1i**

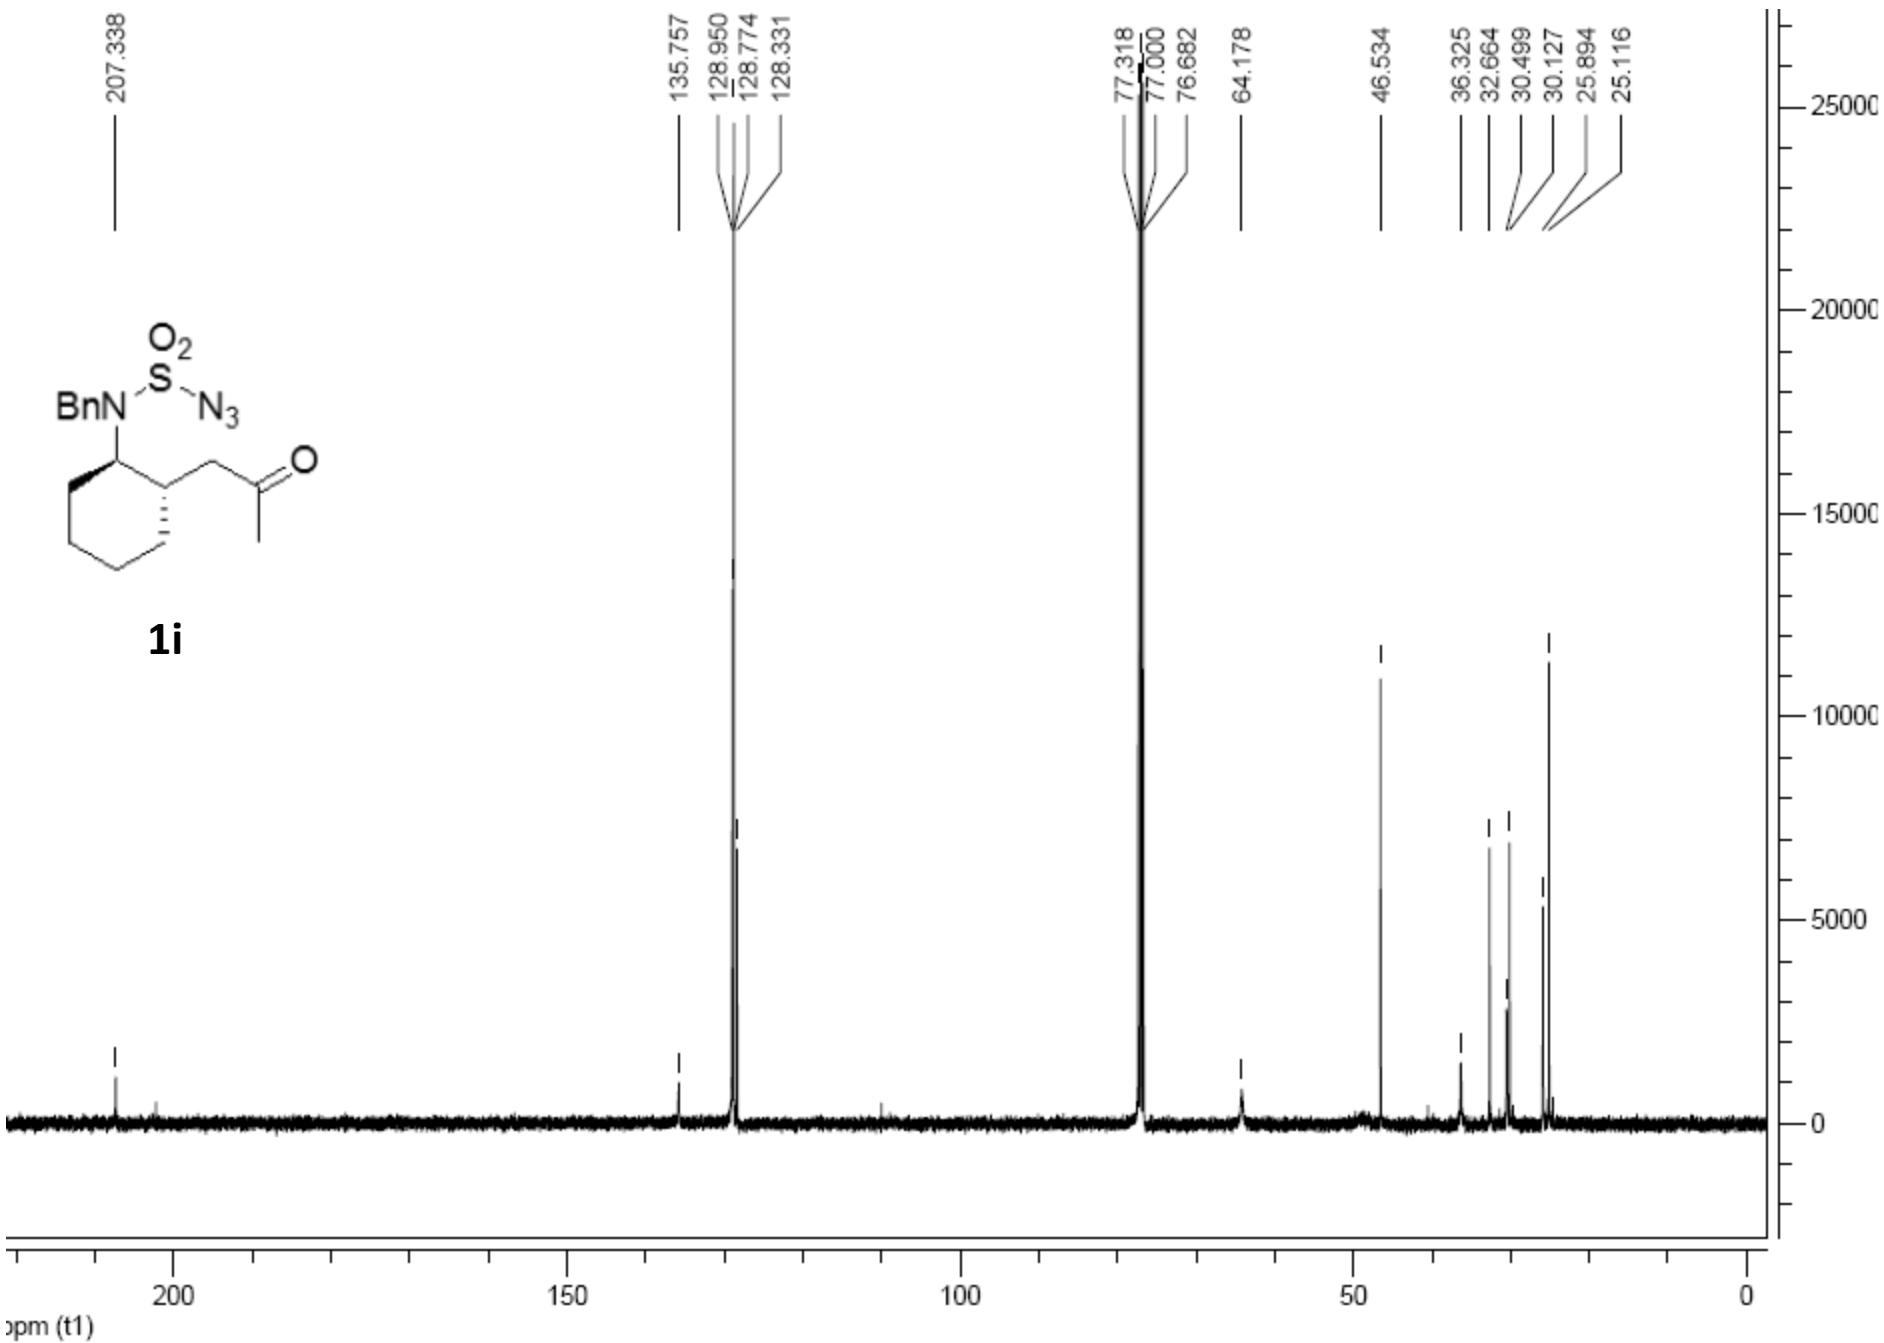



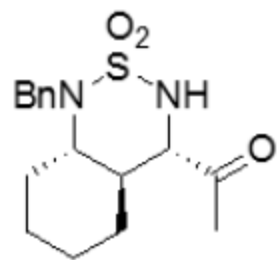

**2i(major)**

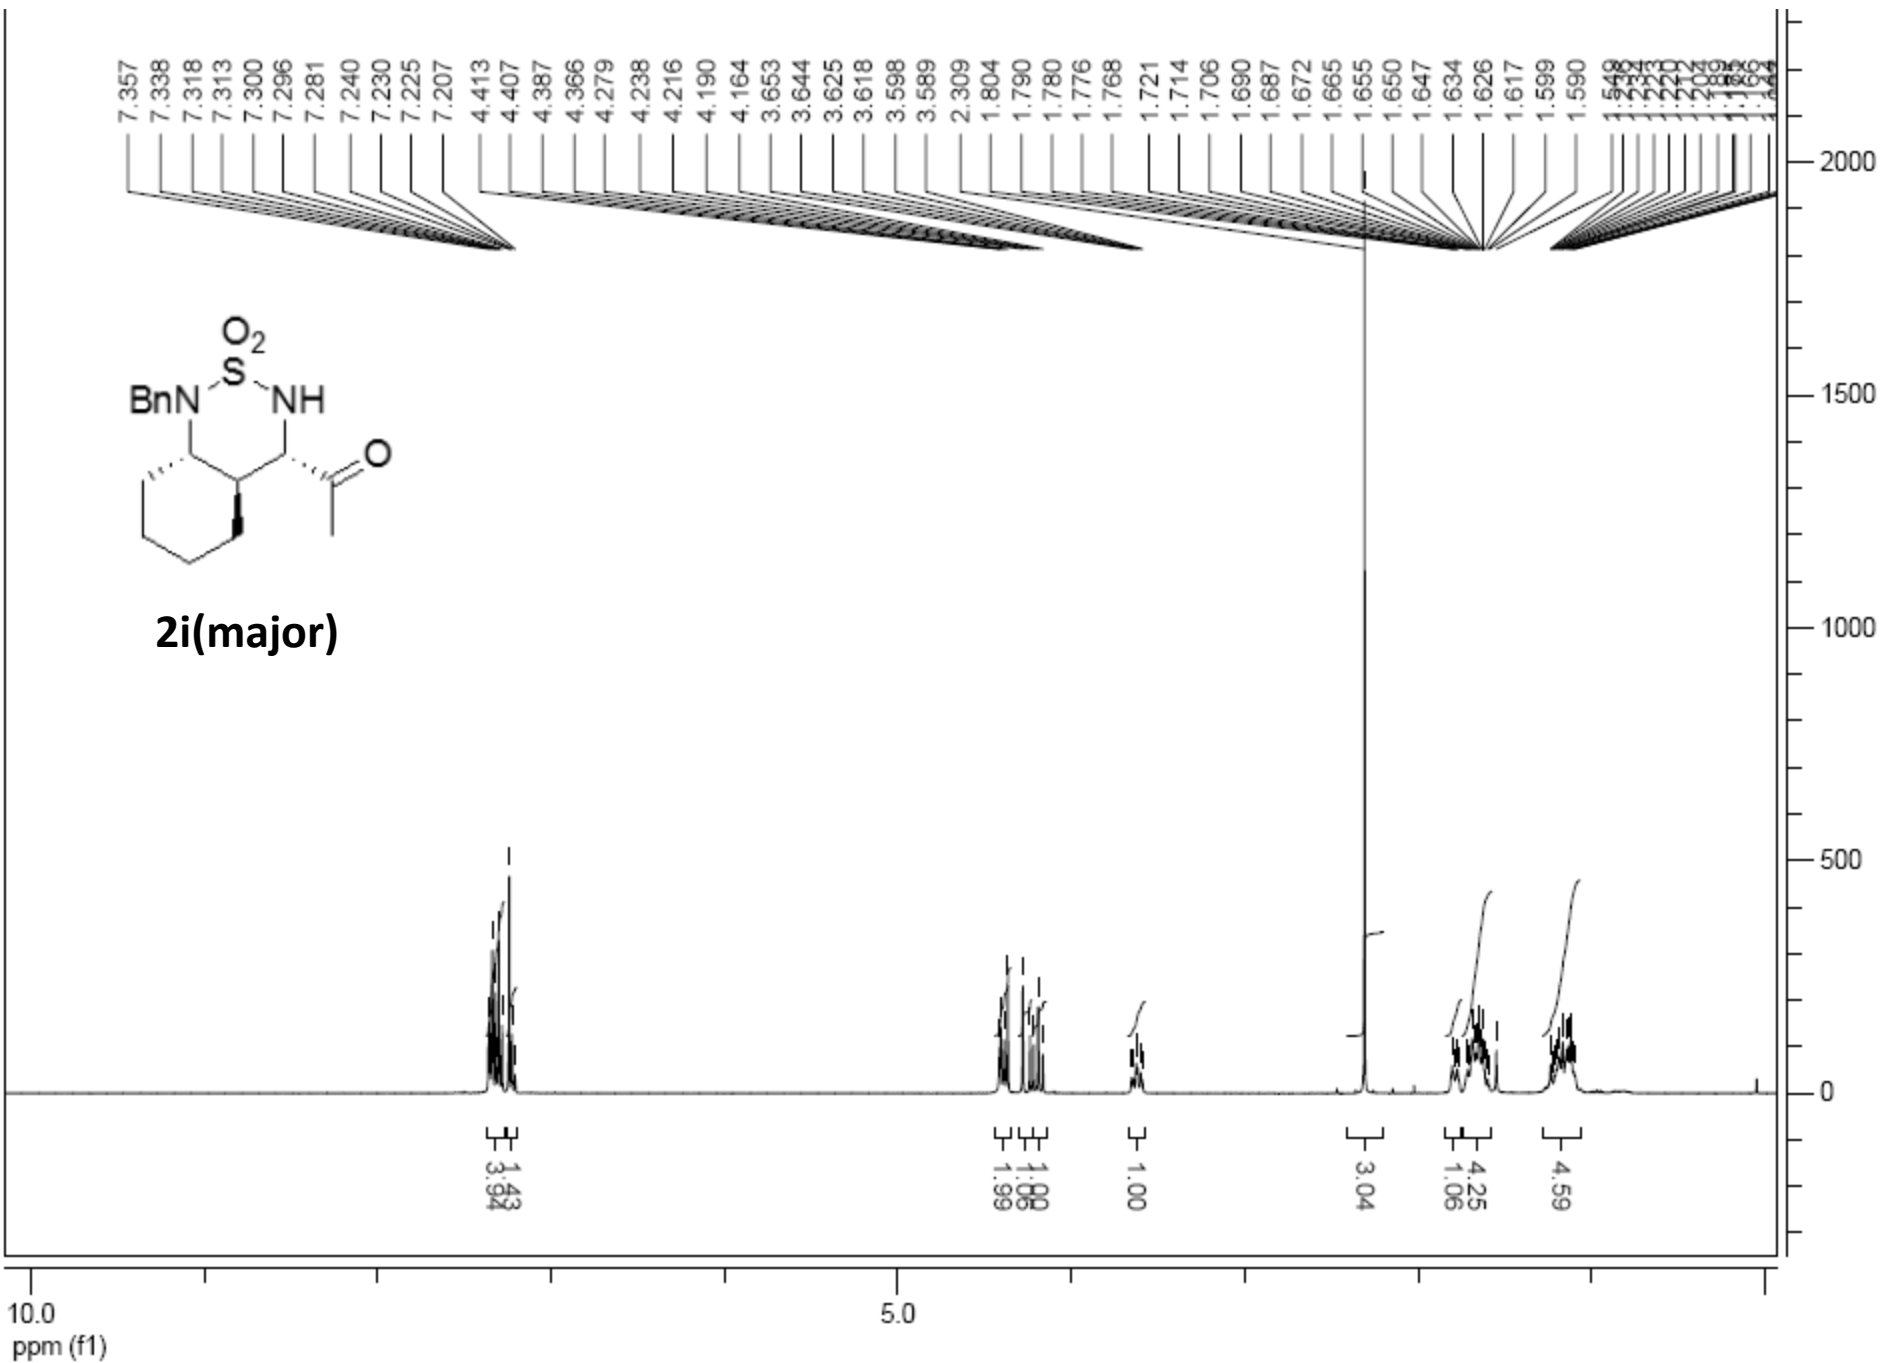

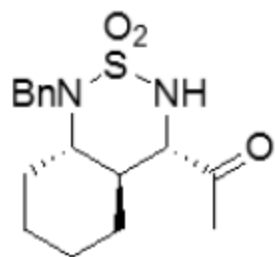

2i (major)

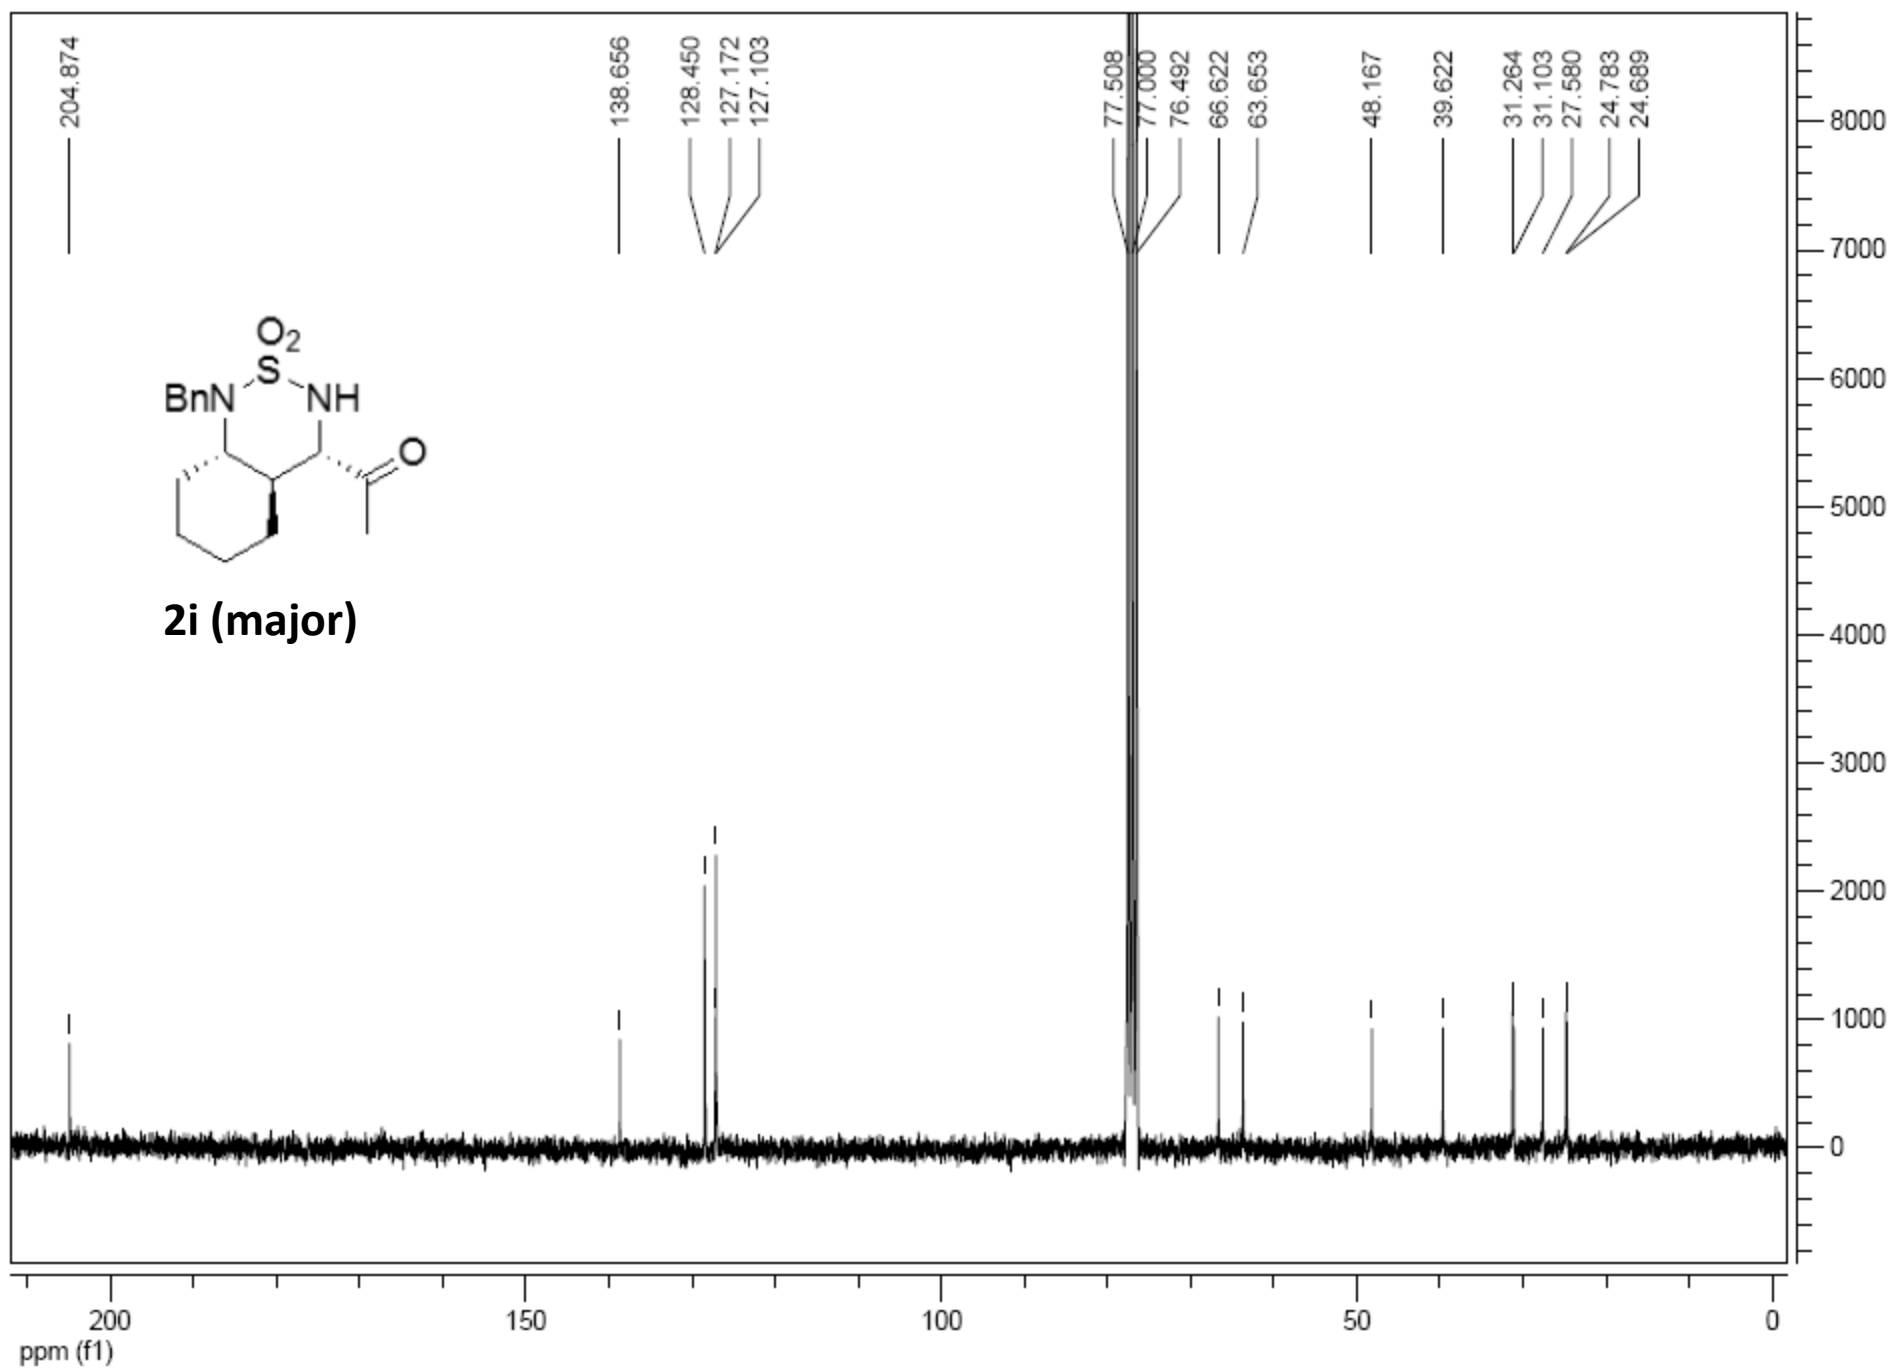

## Crystal Structure of **2i**(major)

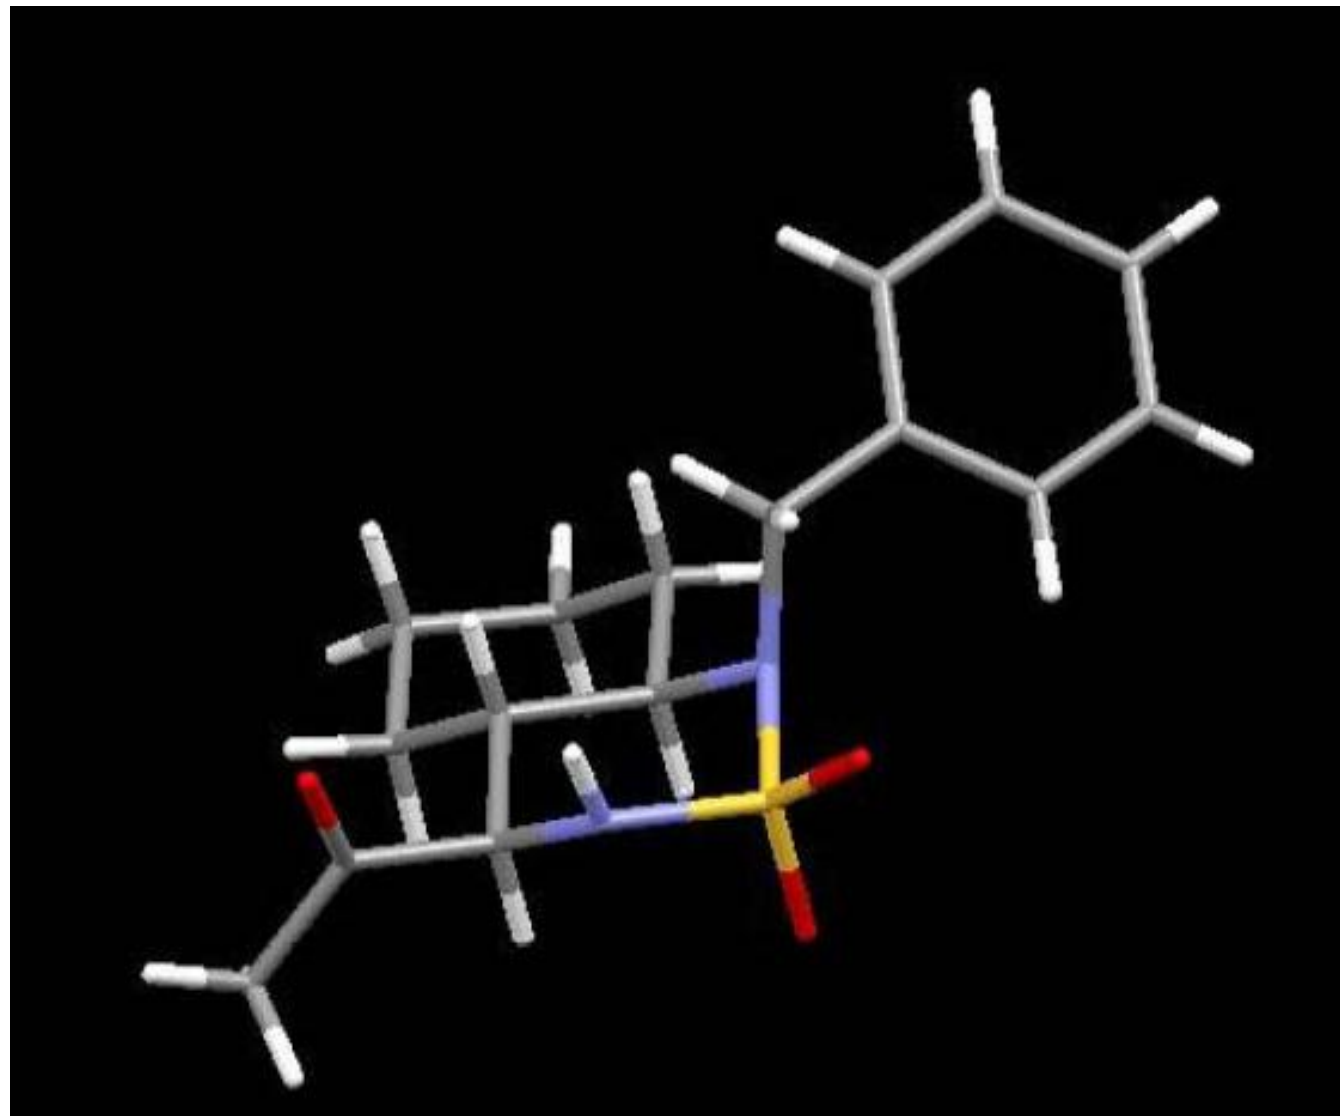

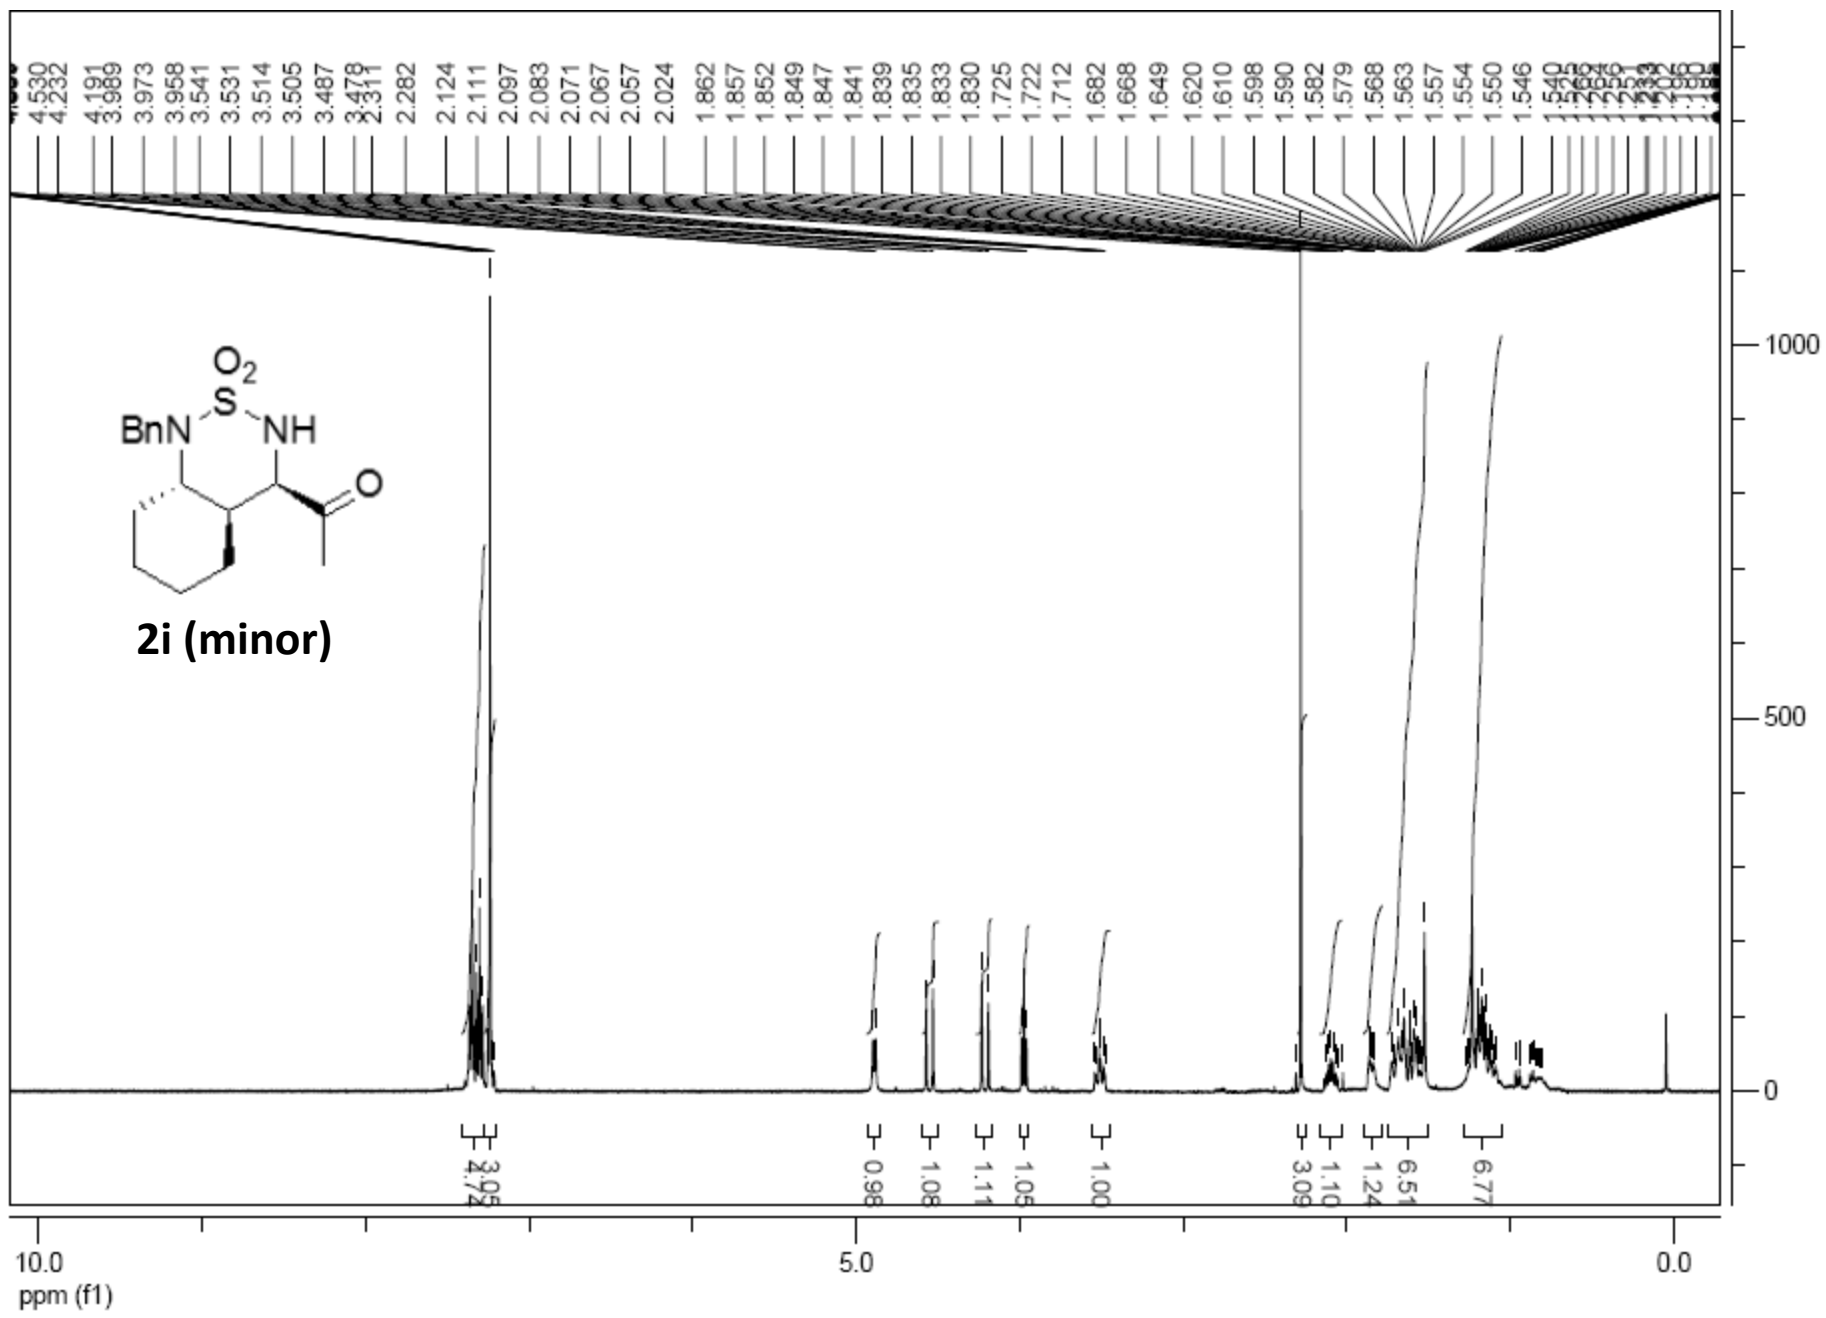

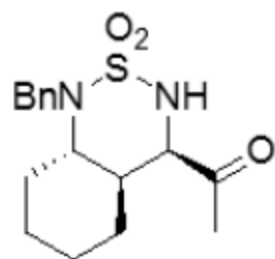

**2i (minor)**

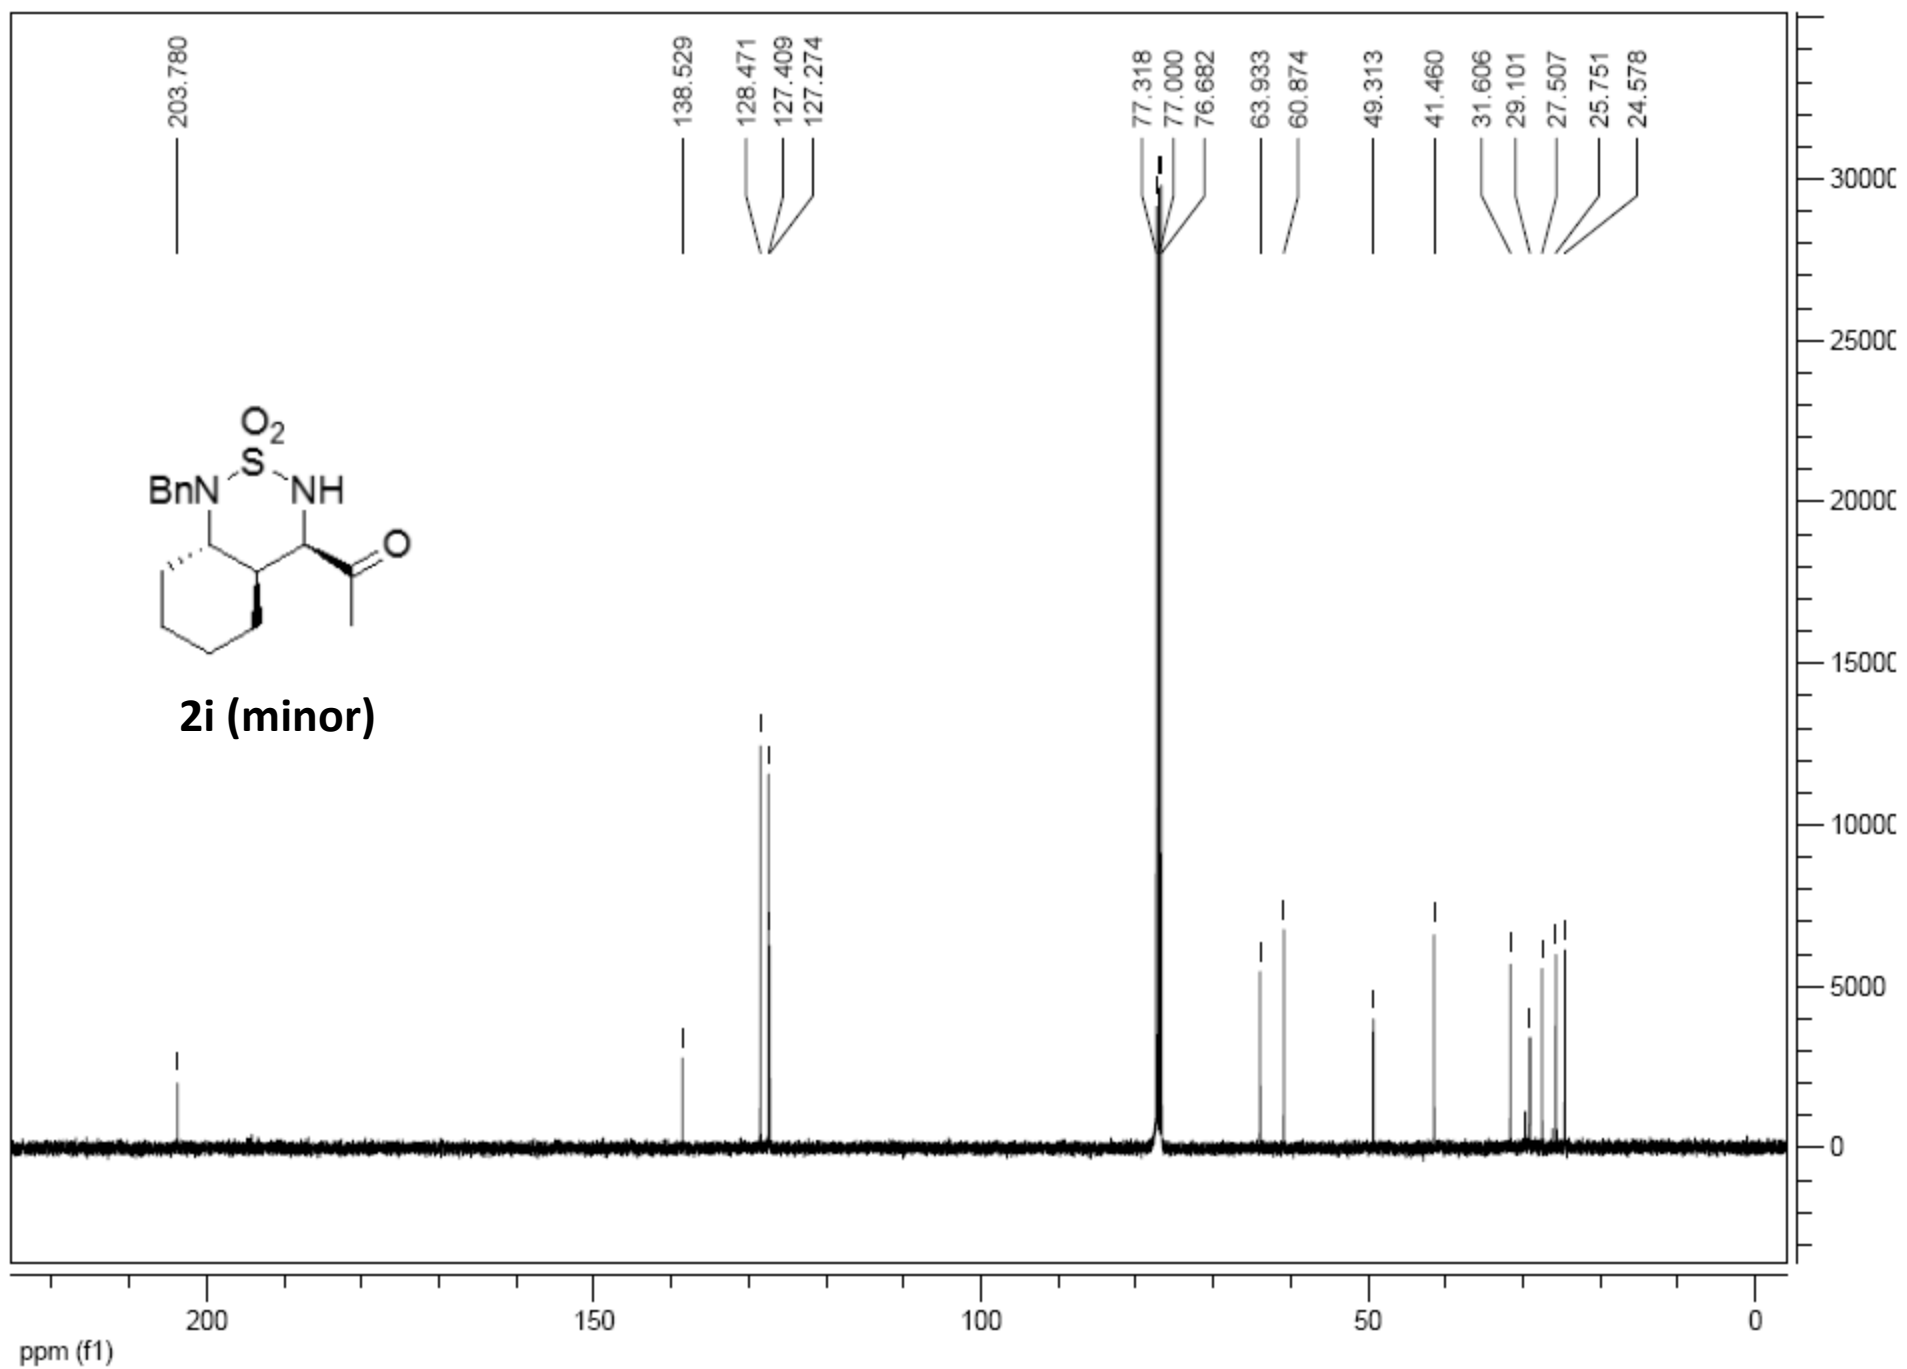

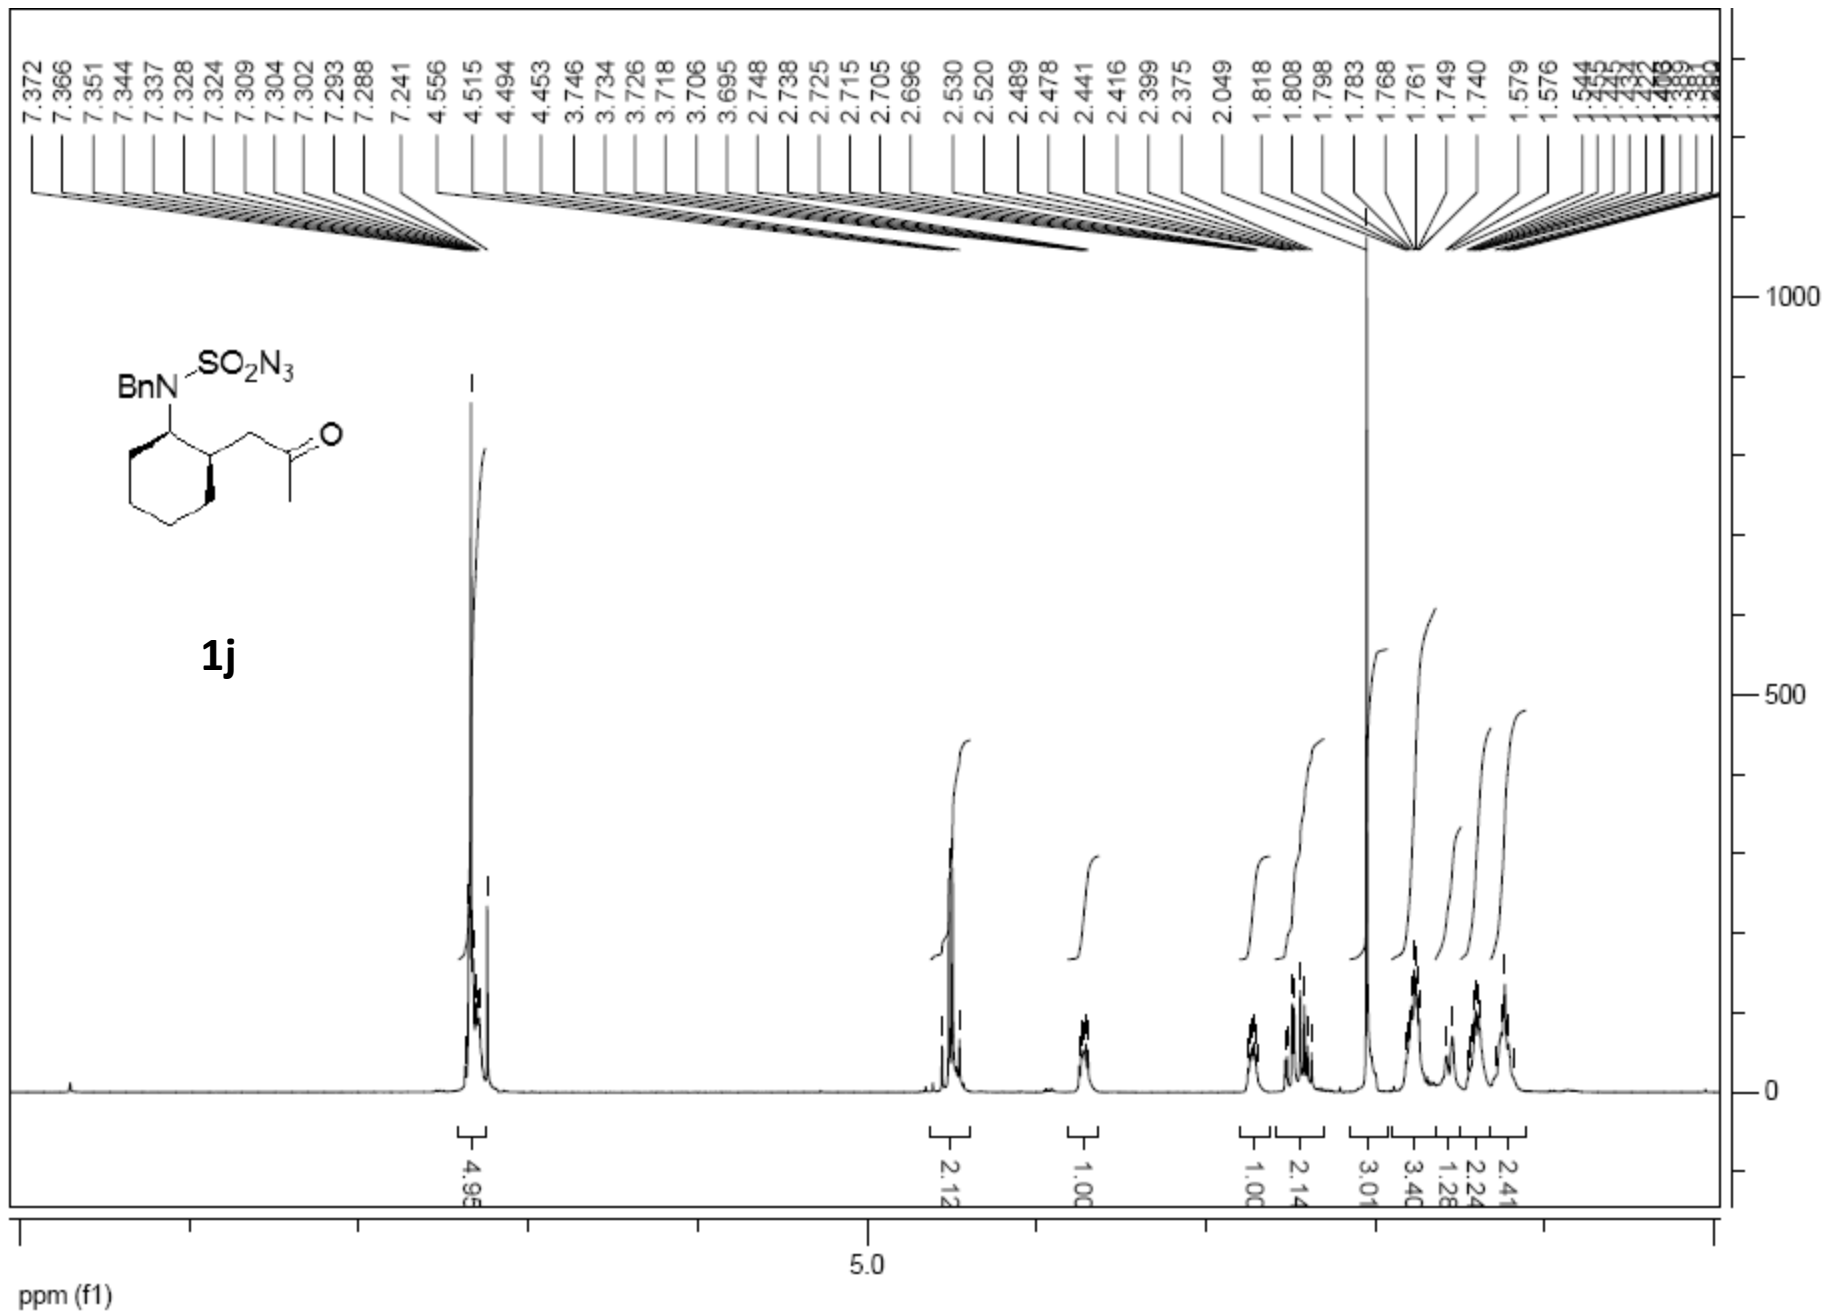

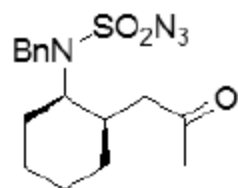

1j

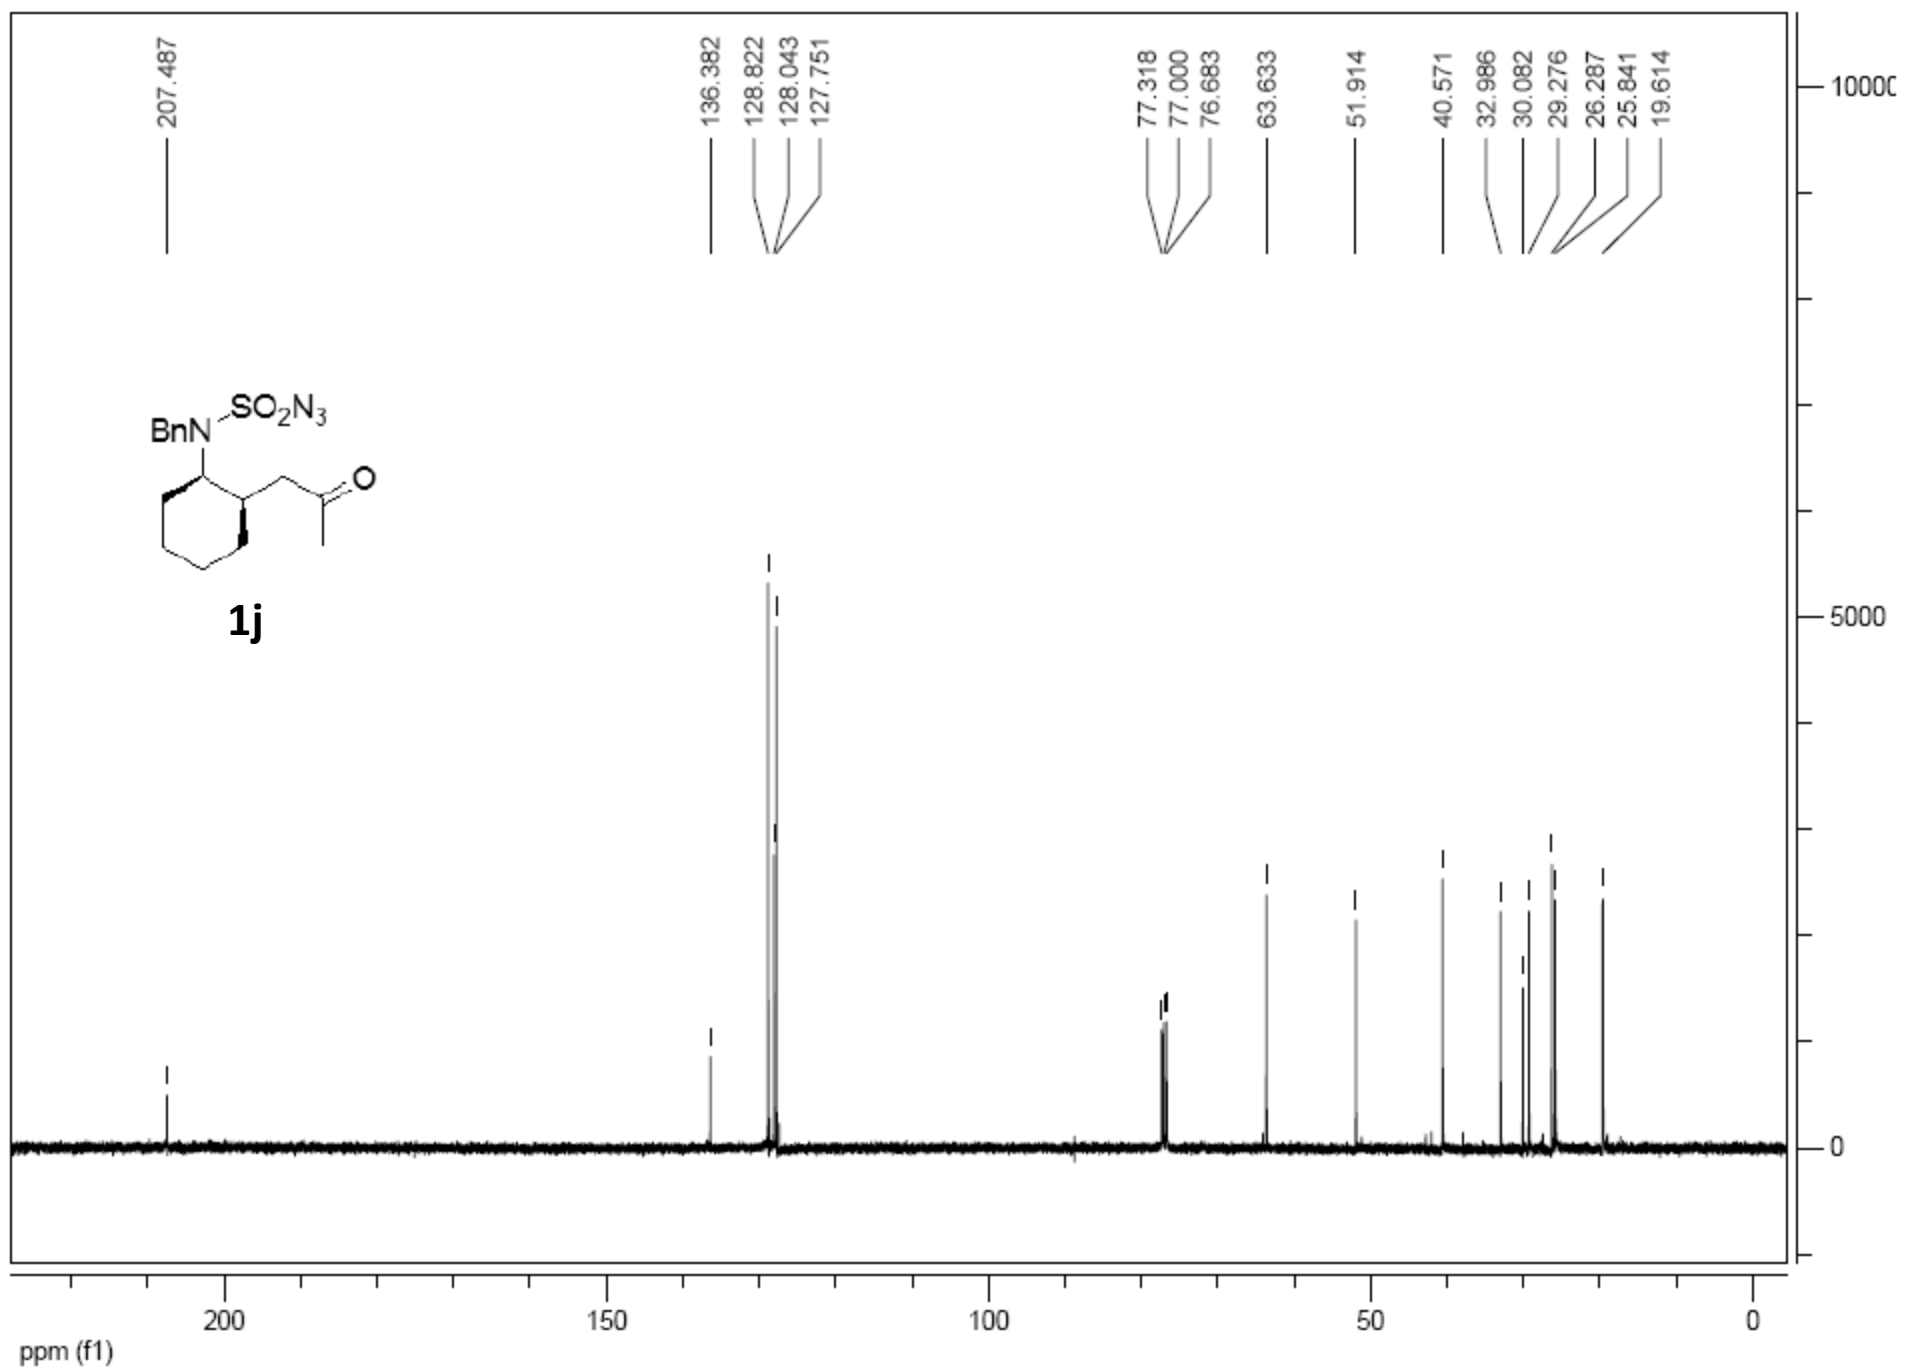

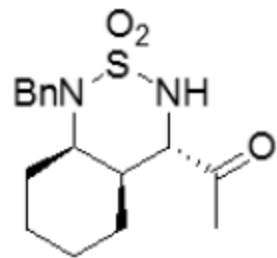

2j

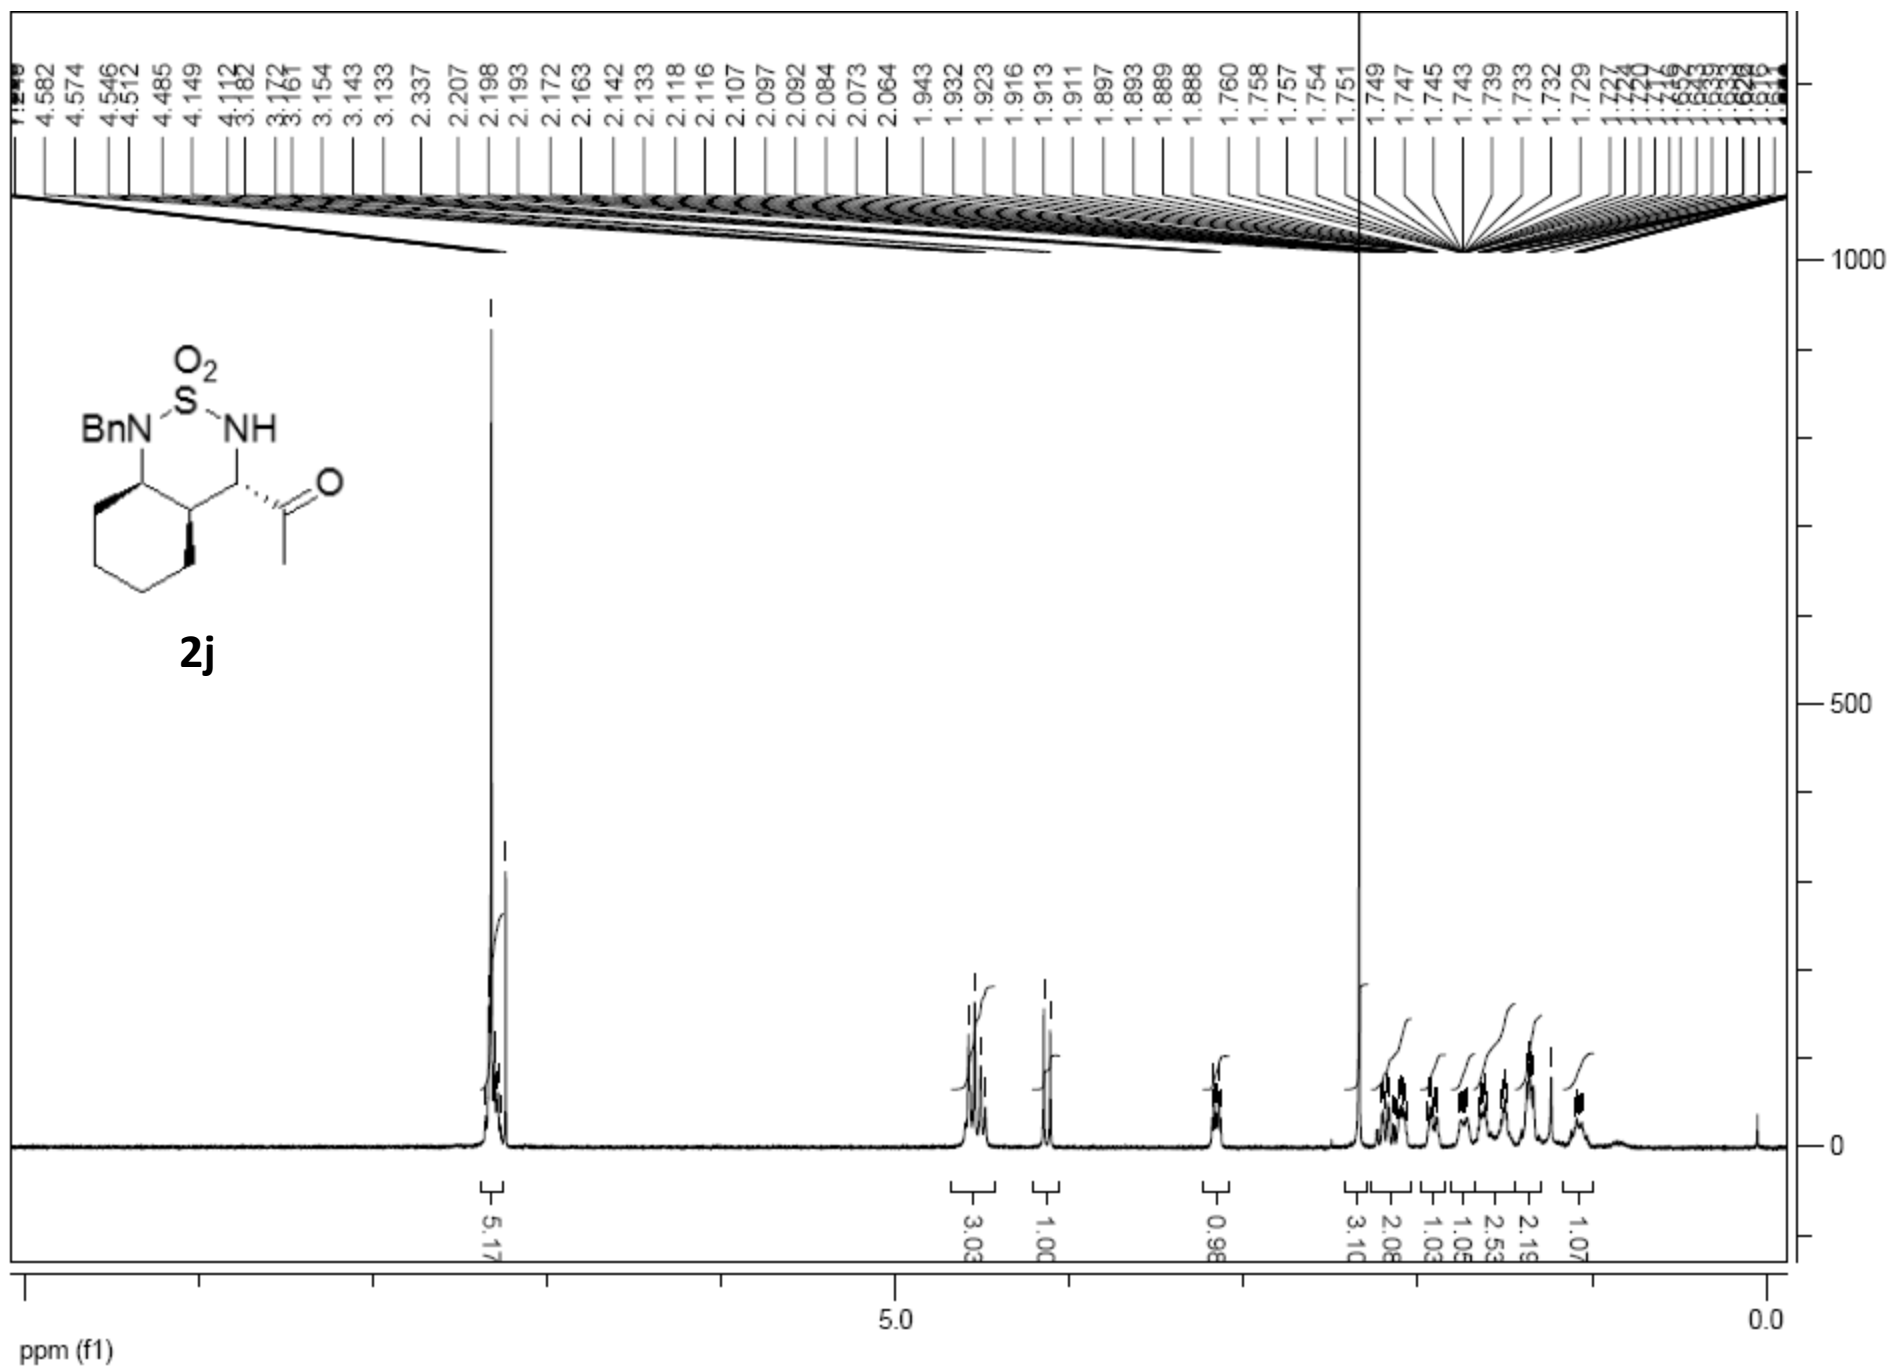



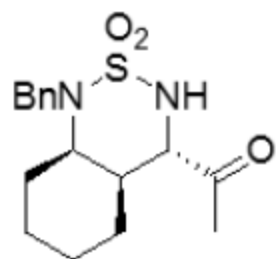

2j

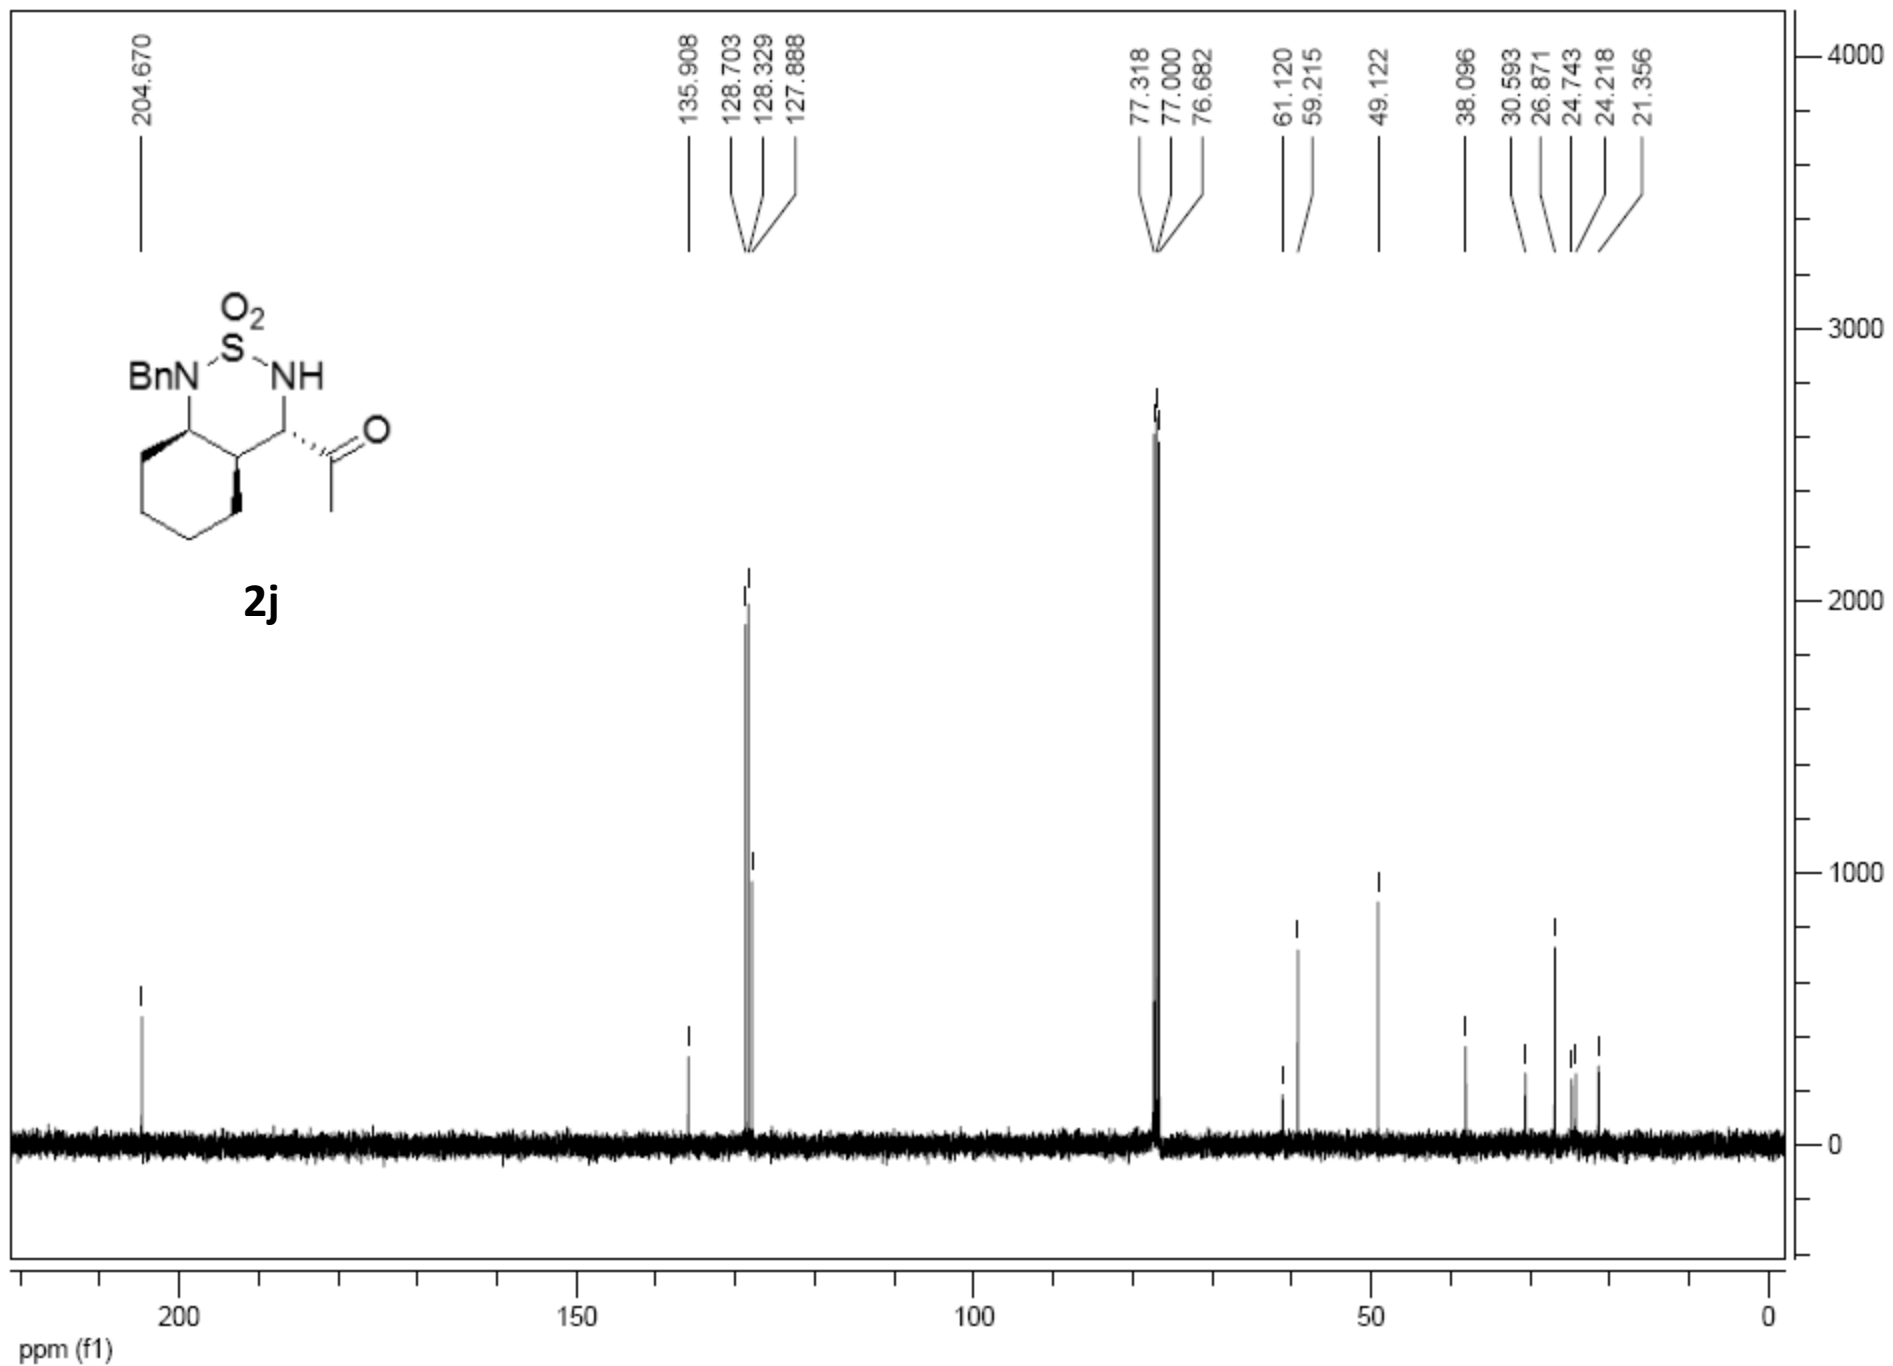

# Crystal Structure of **2j**

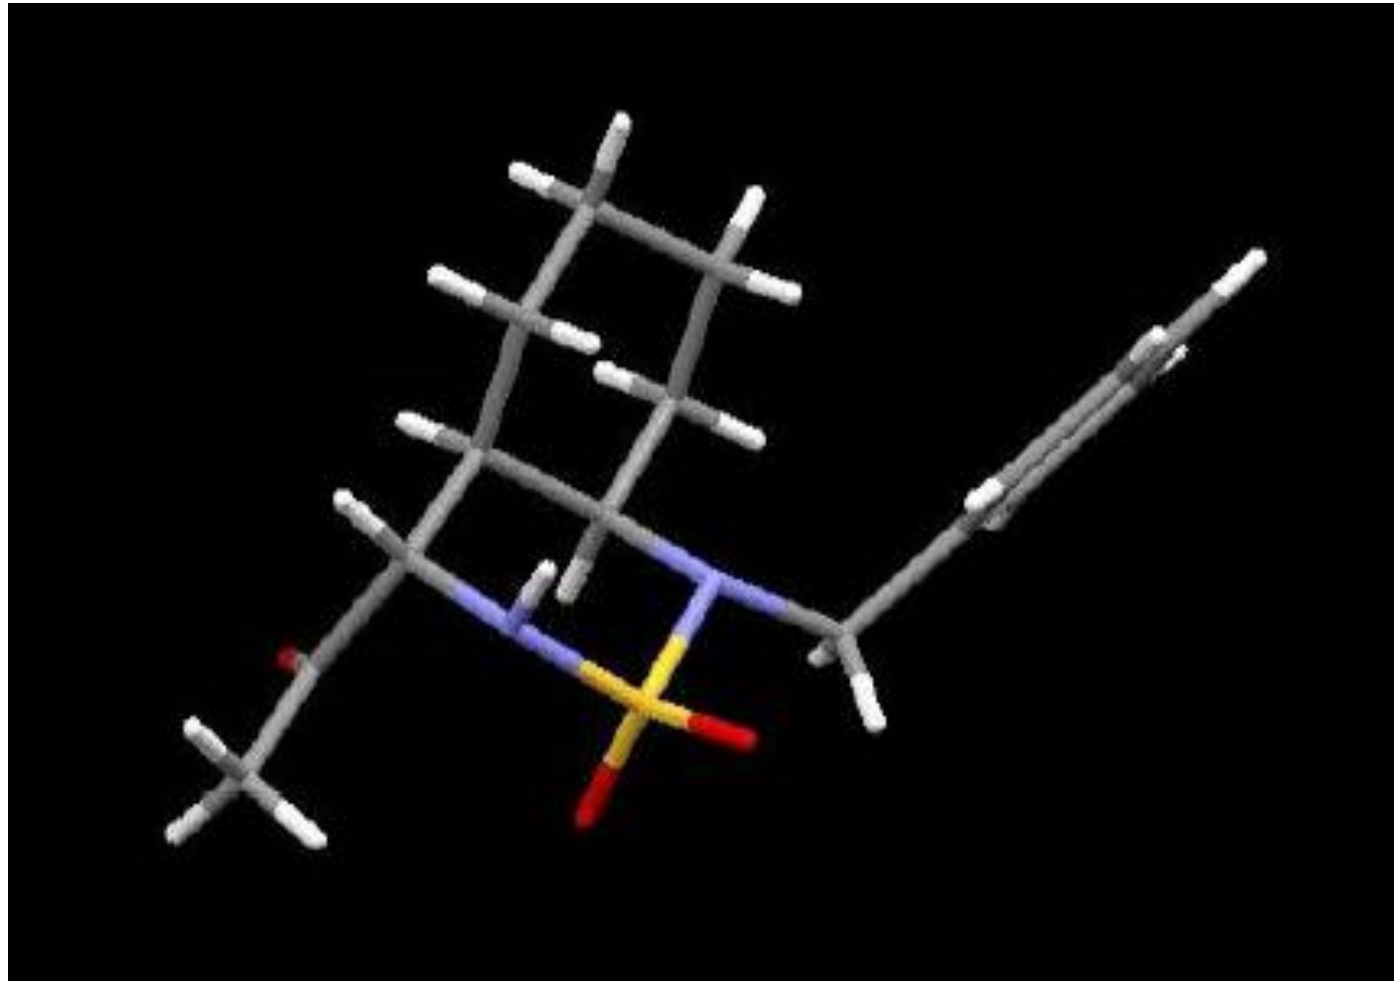

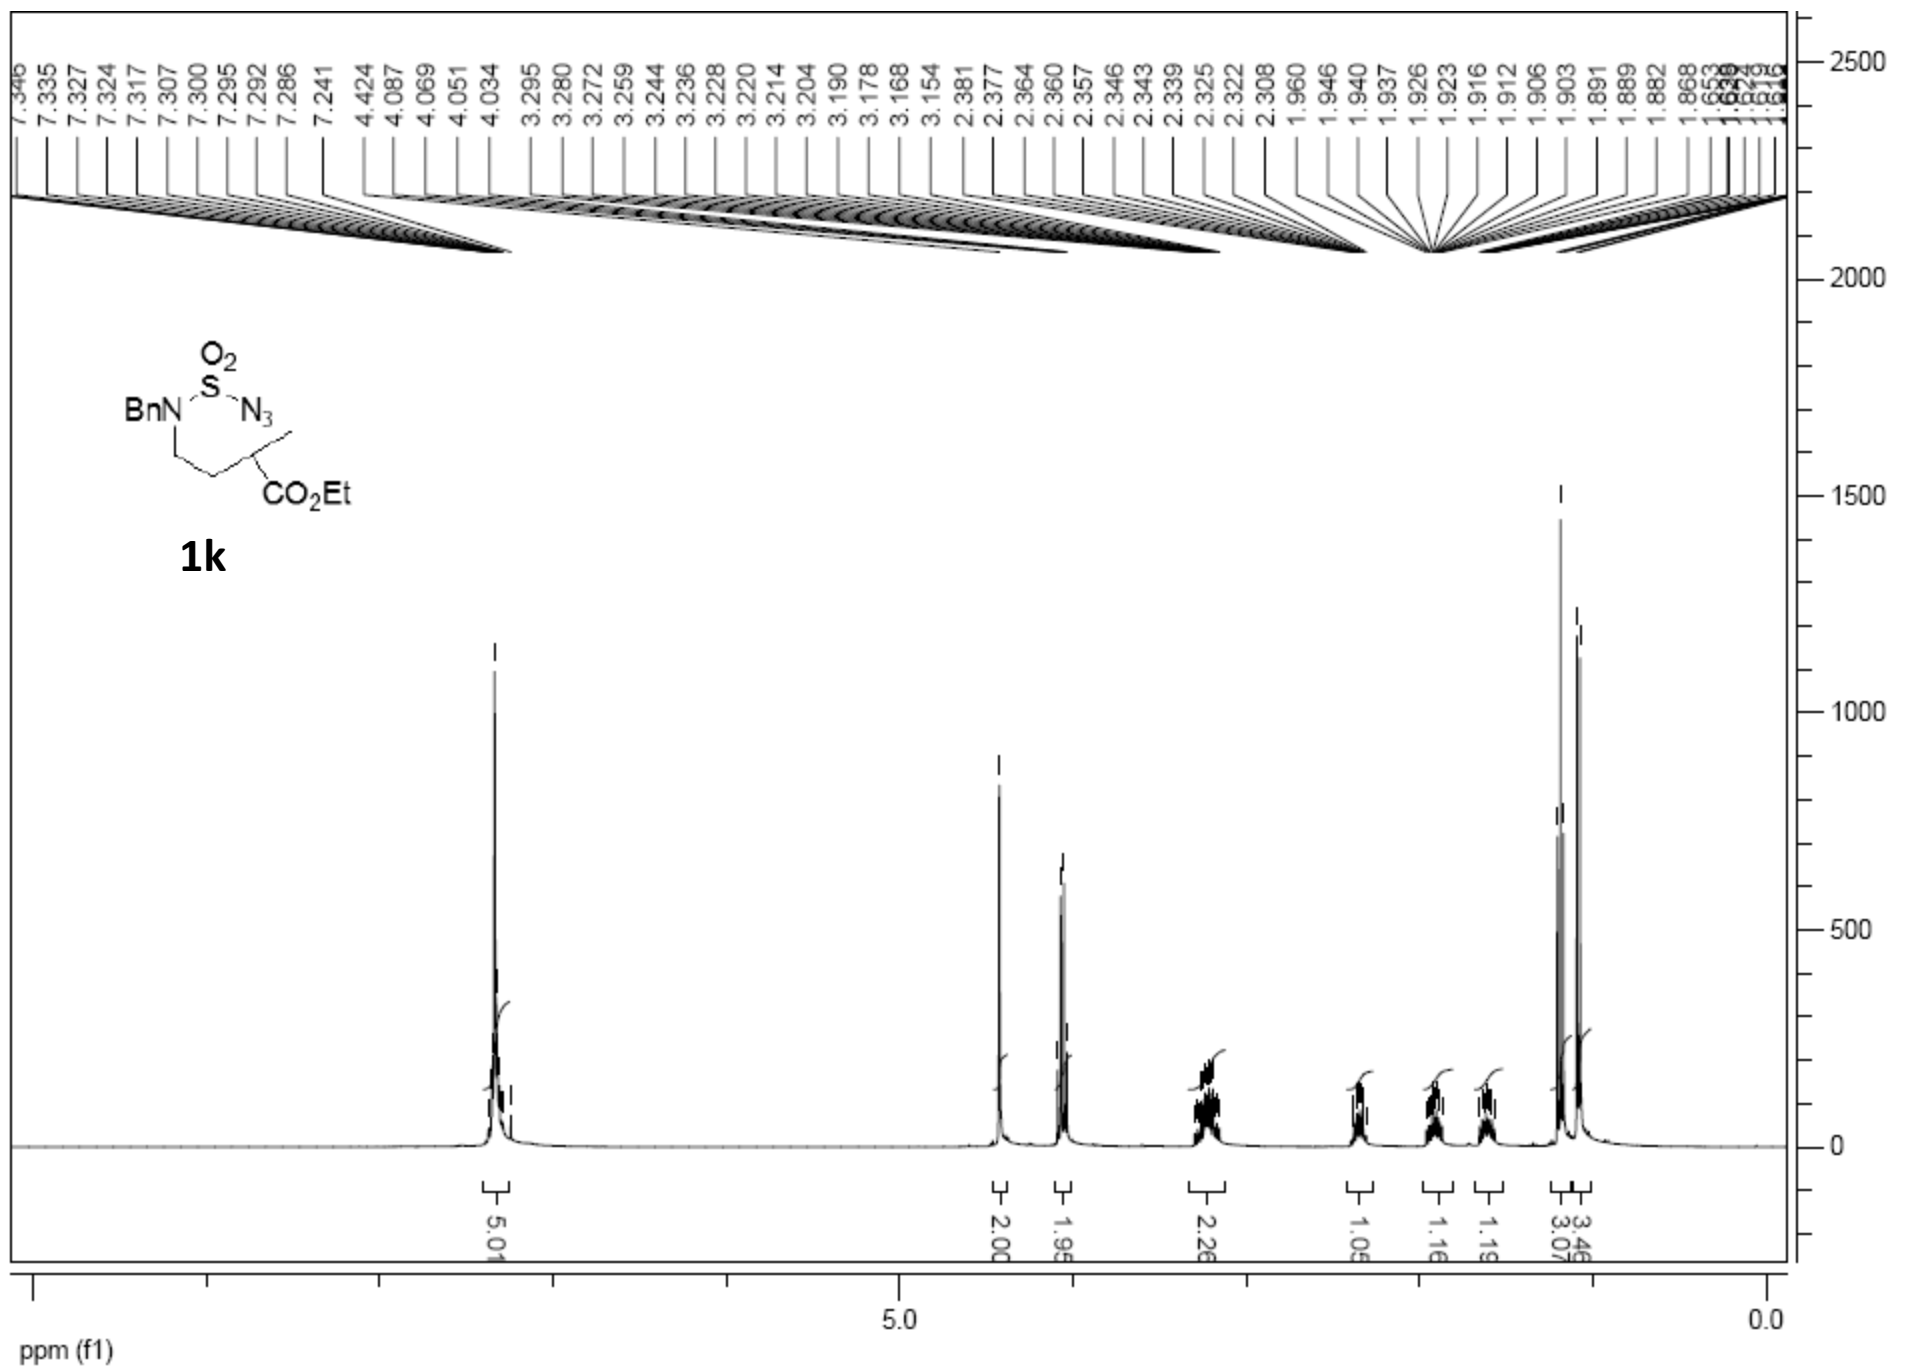

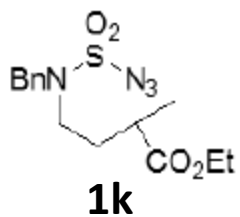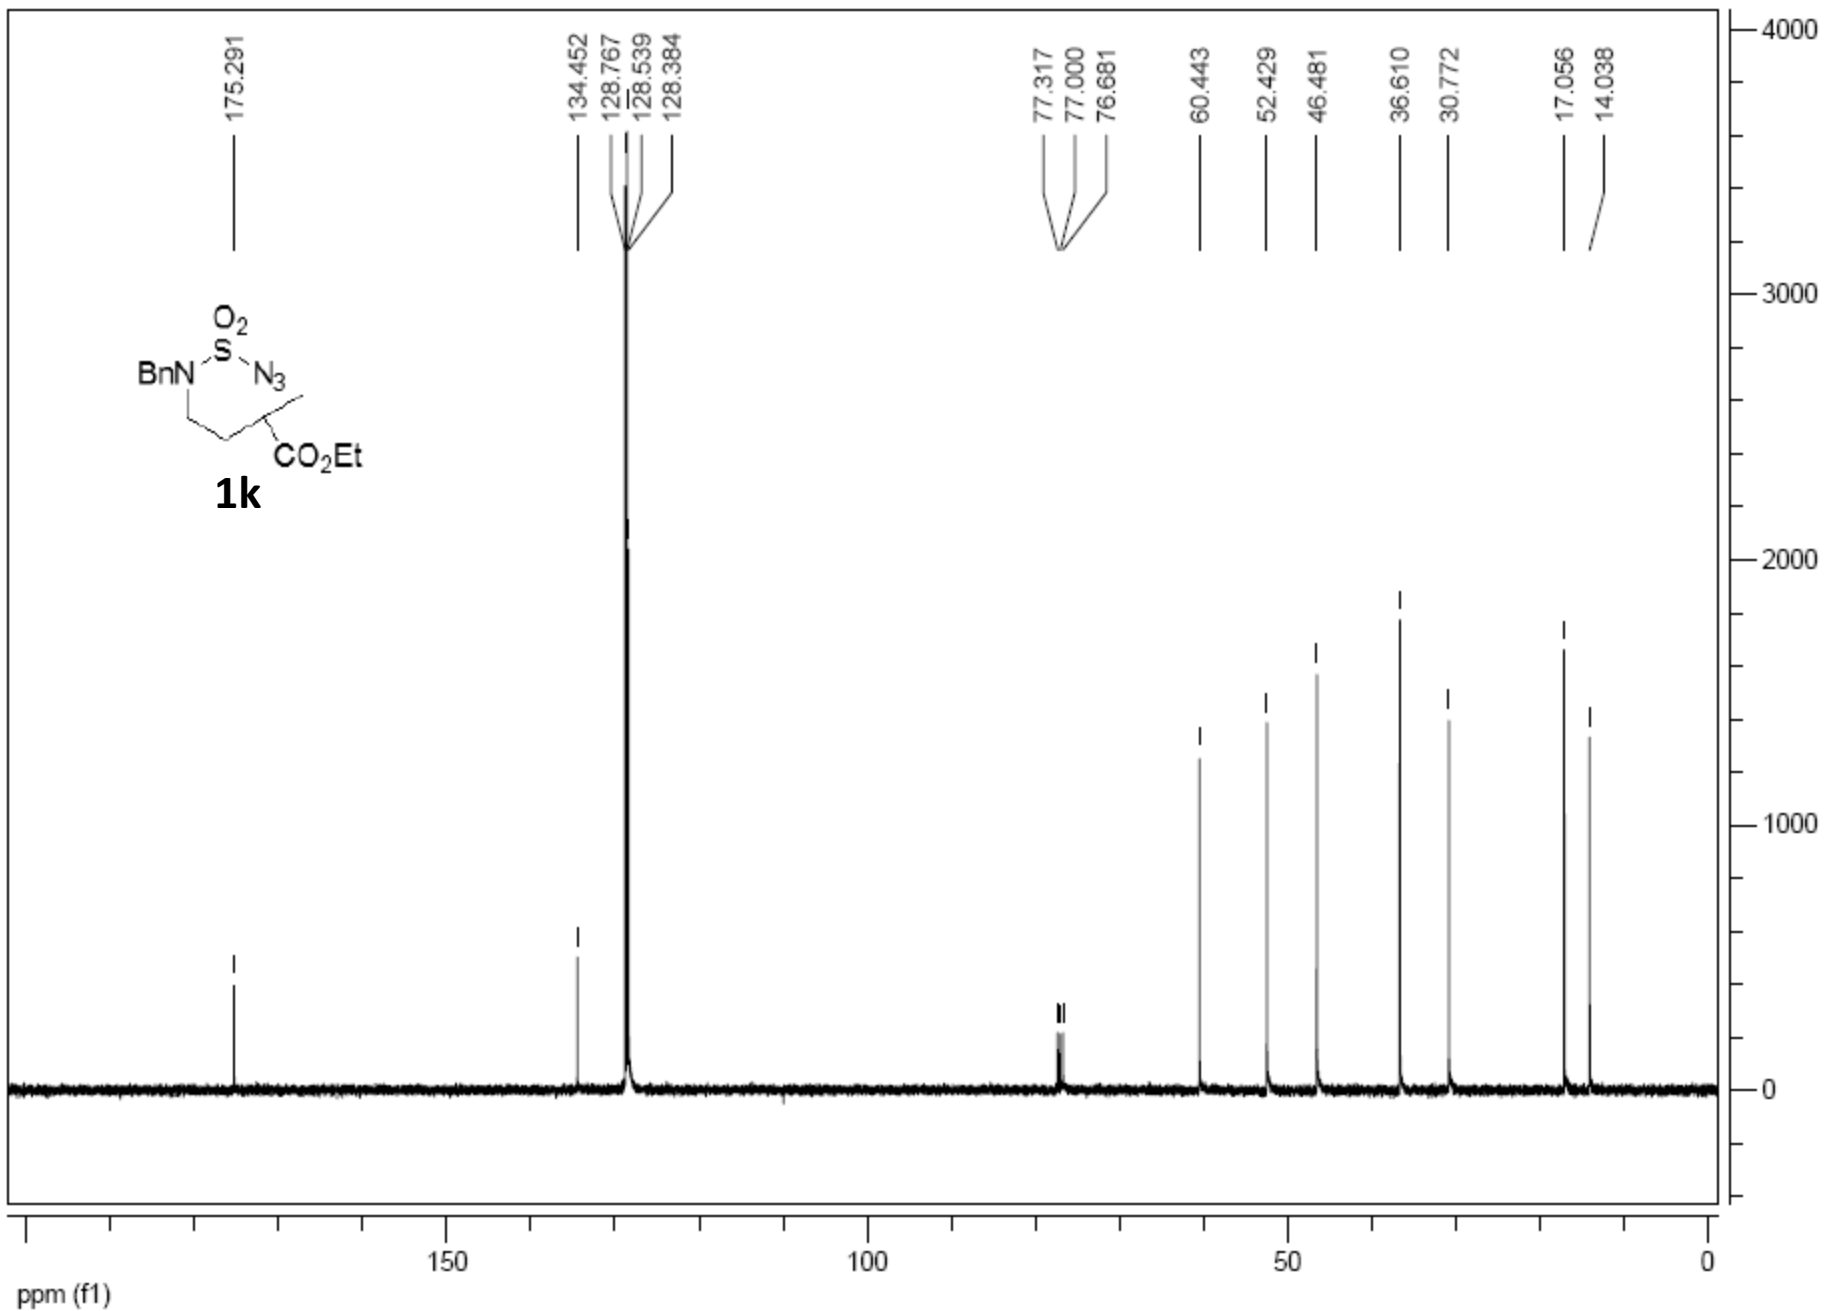

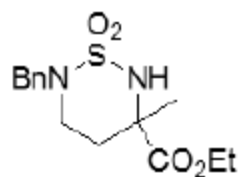

**2k**

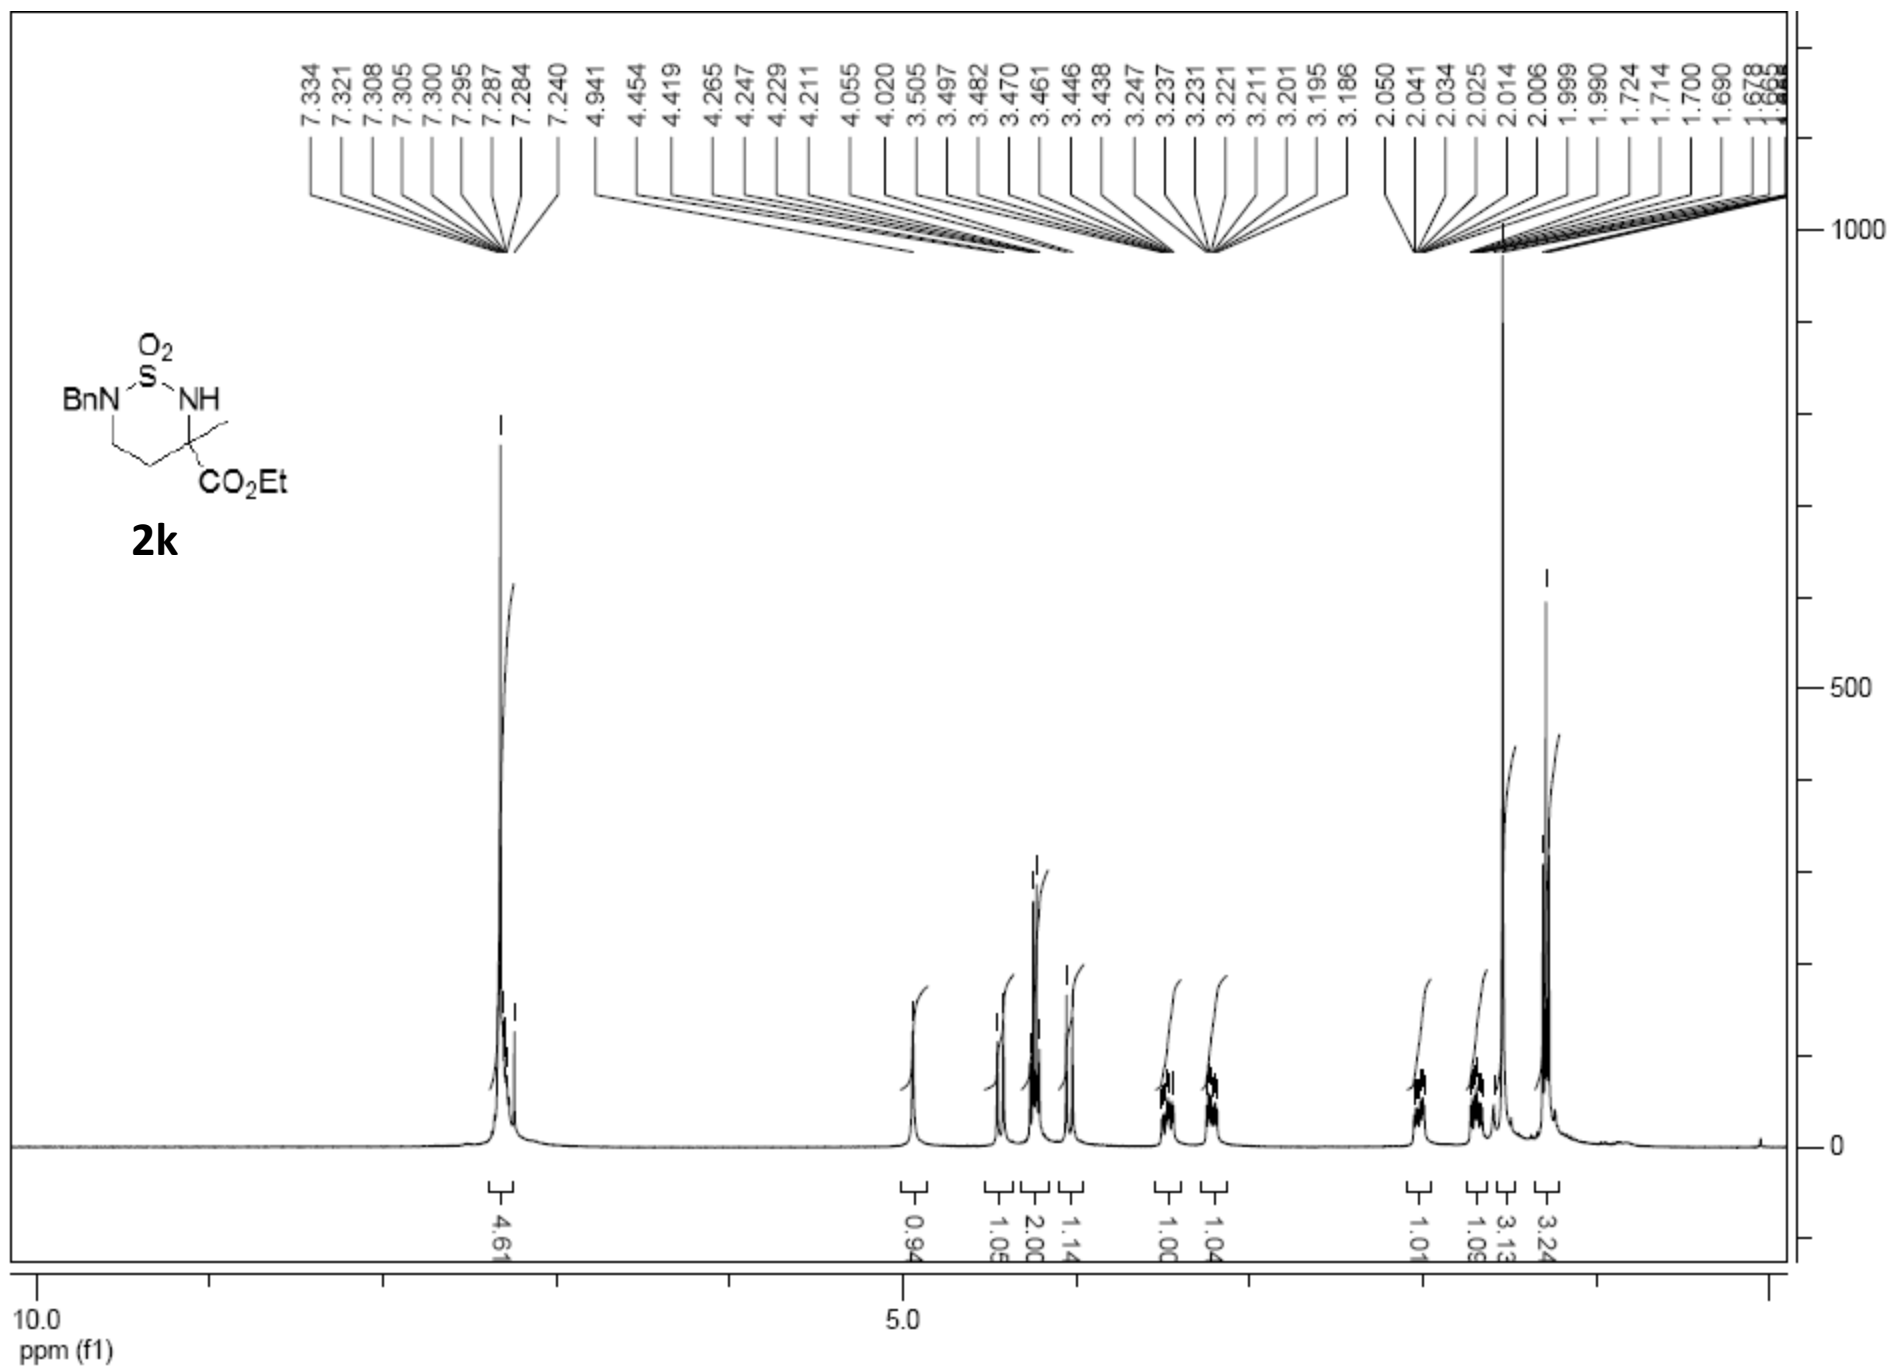

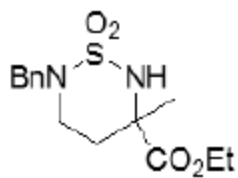

**2k**

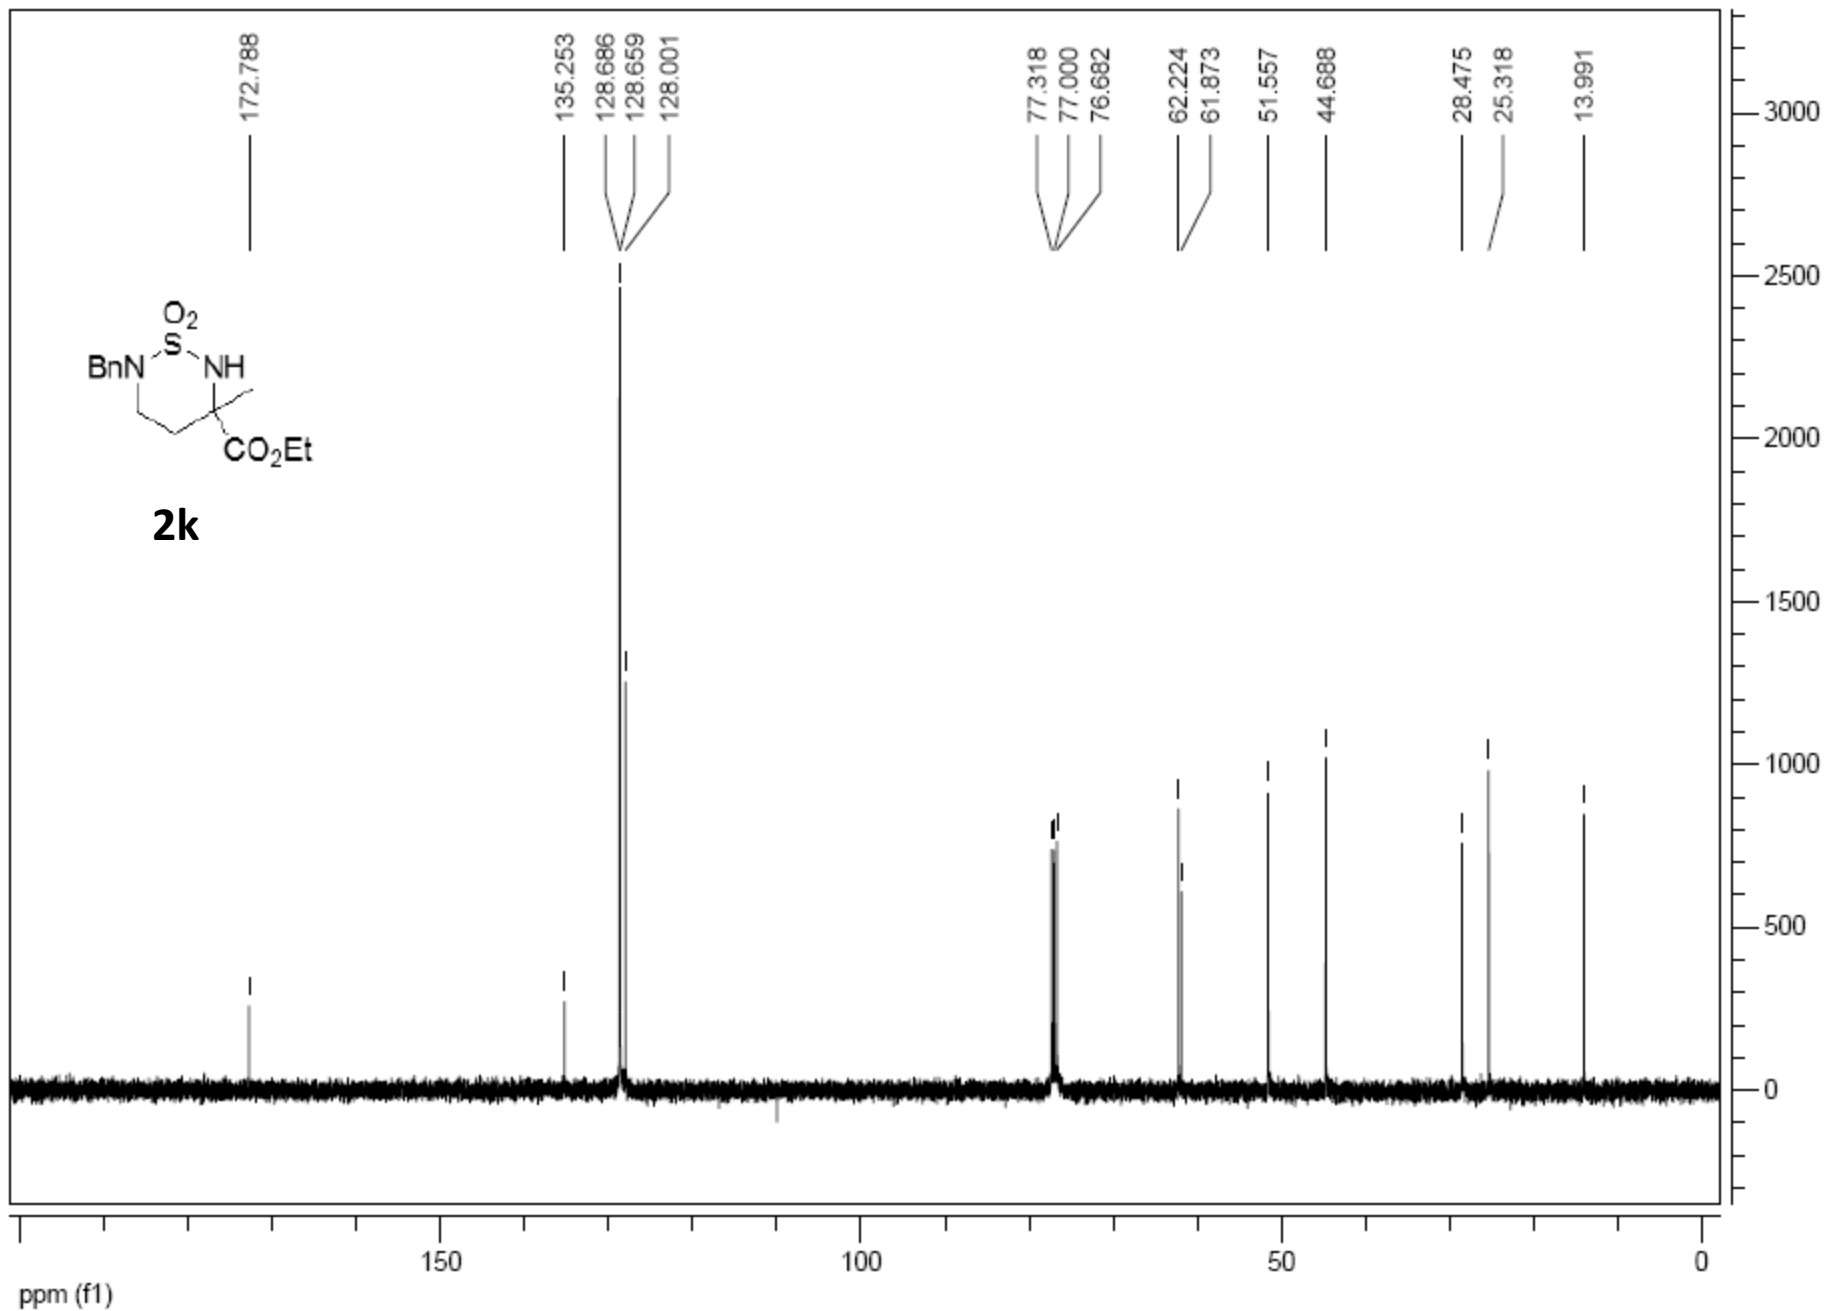

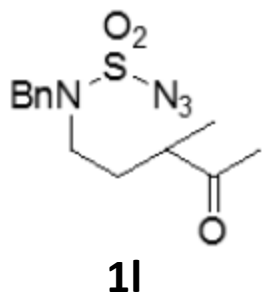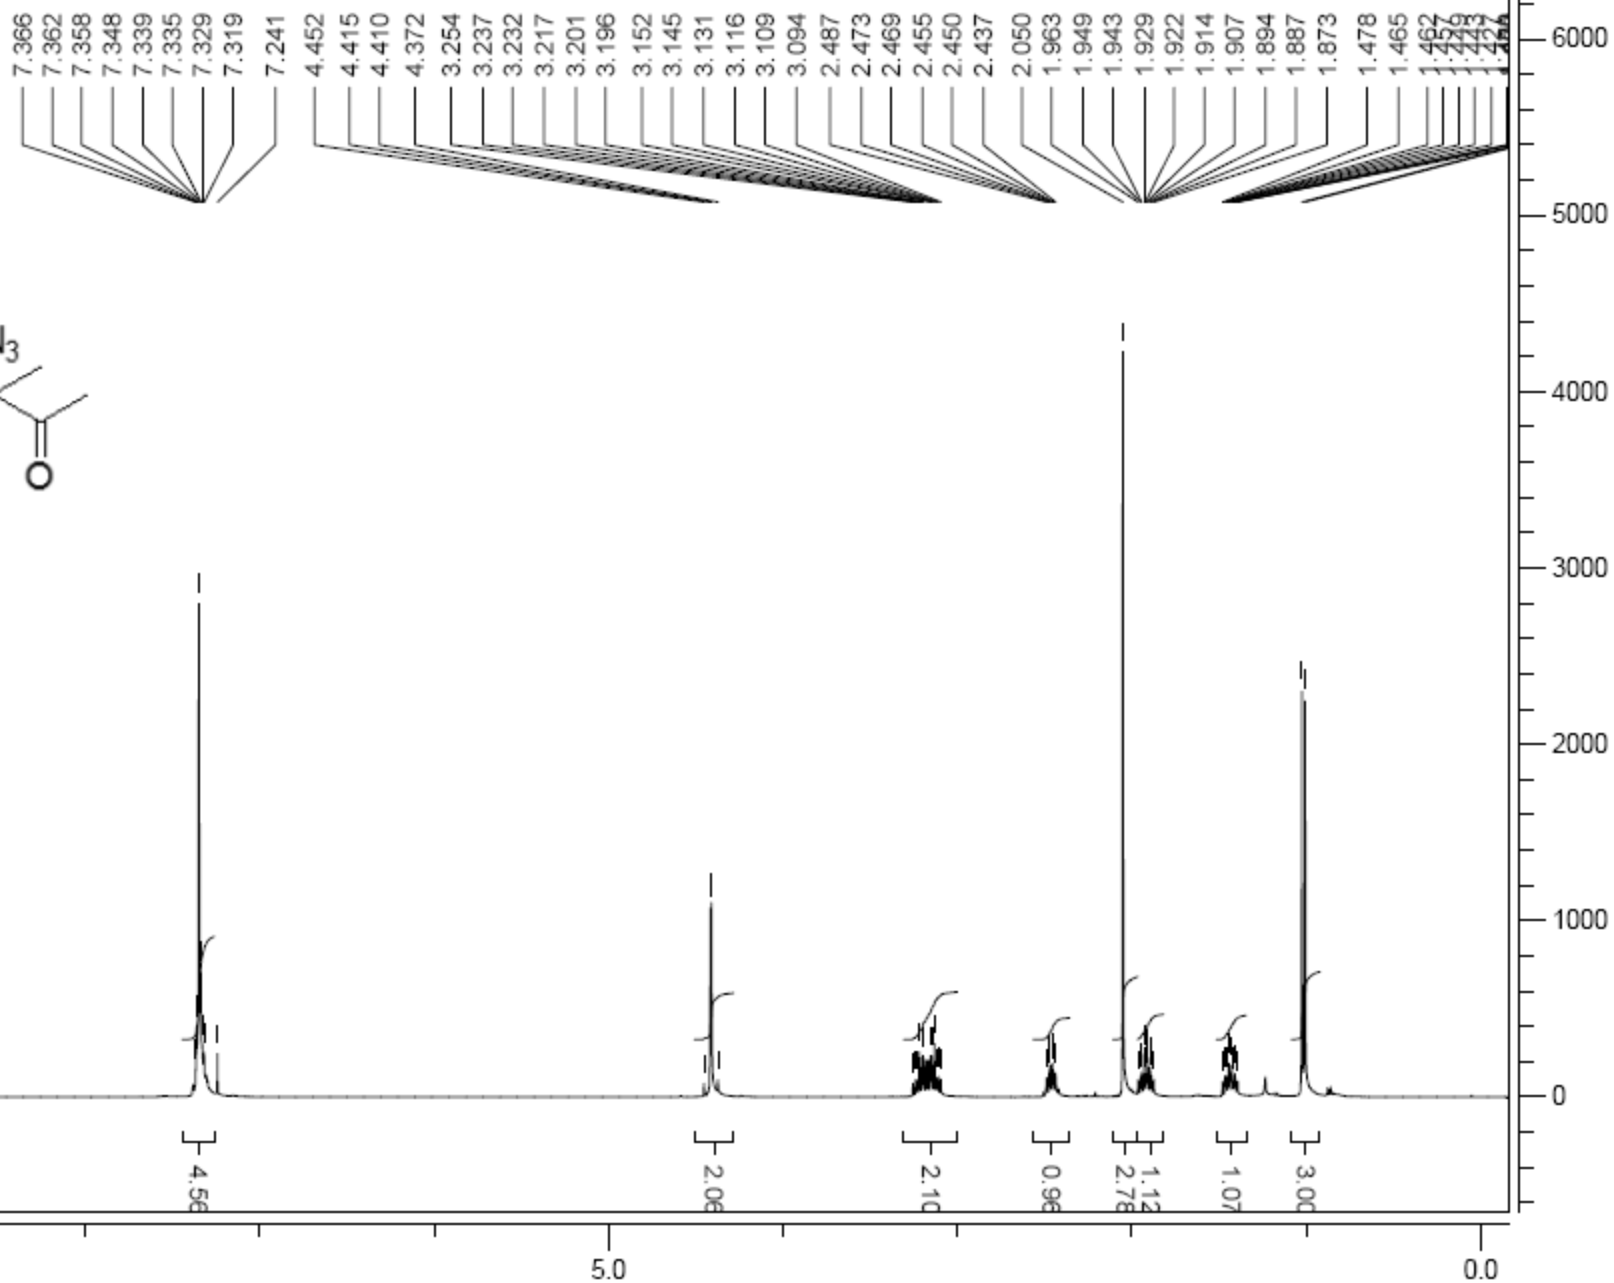

ppm (f1)

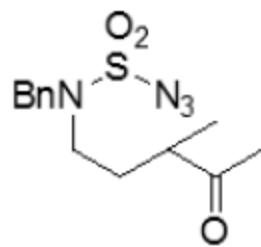

**11**

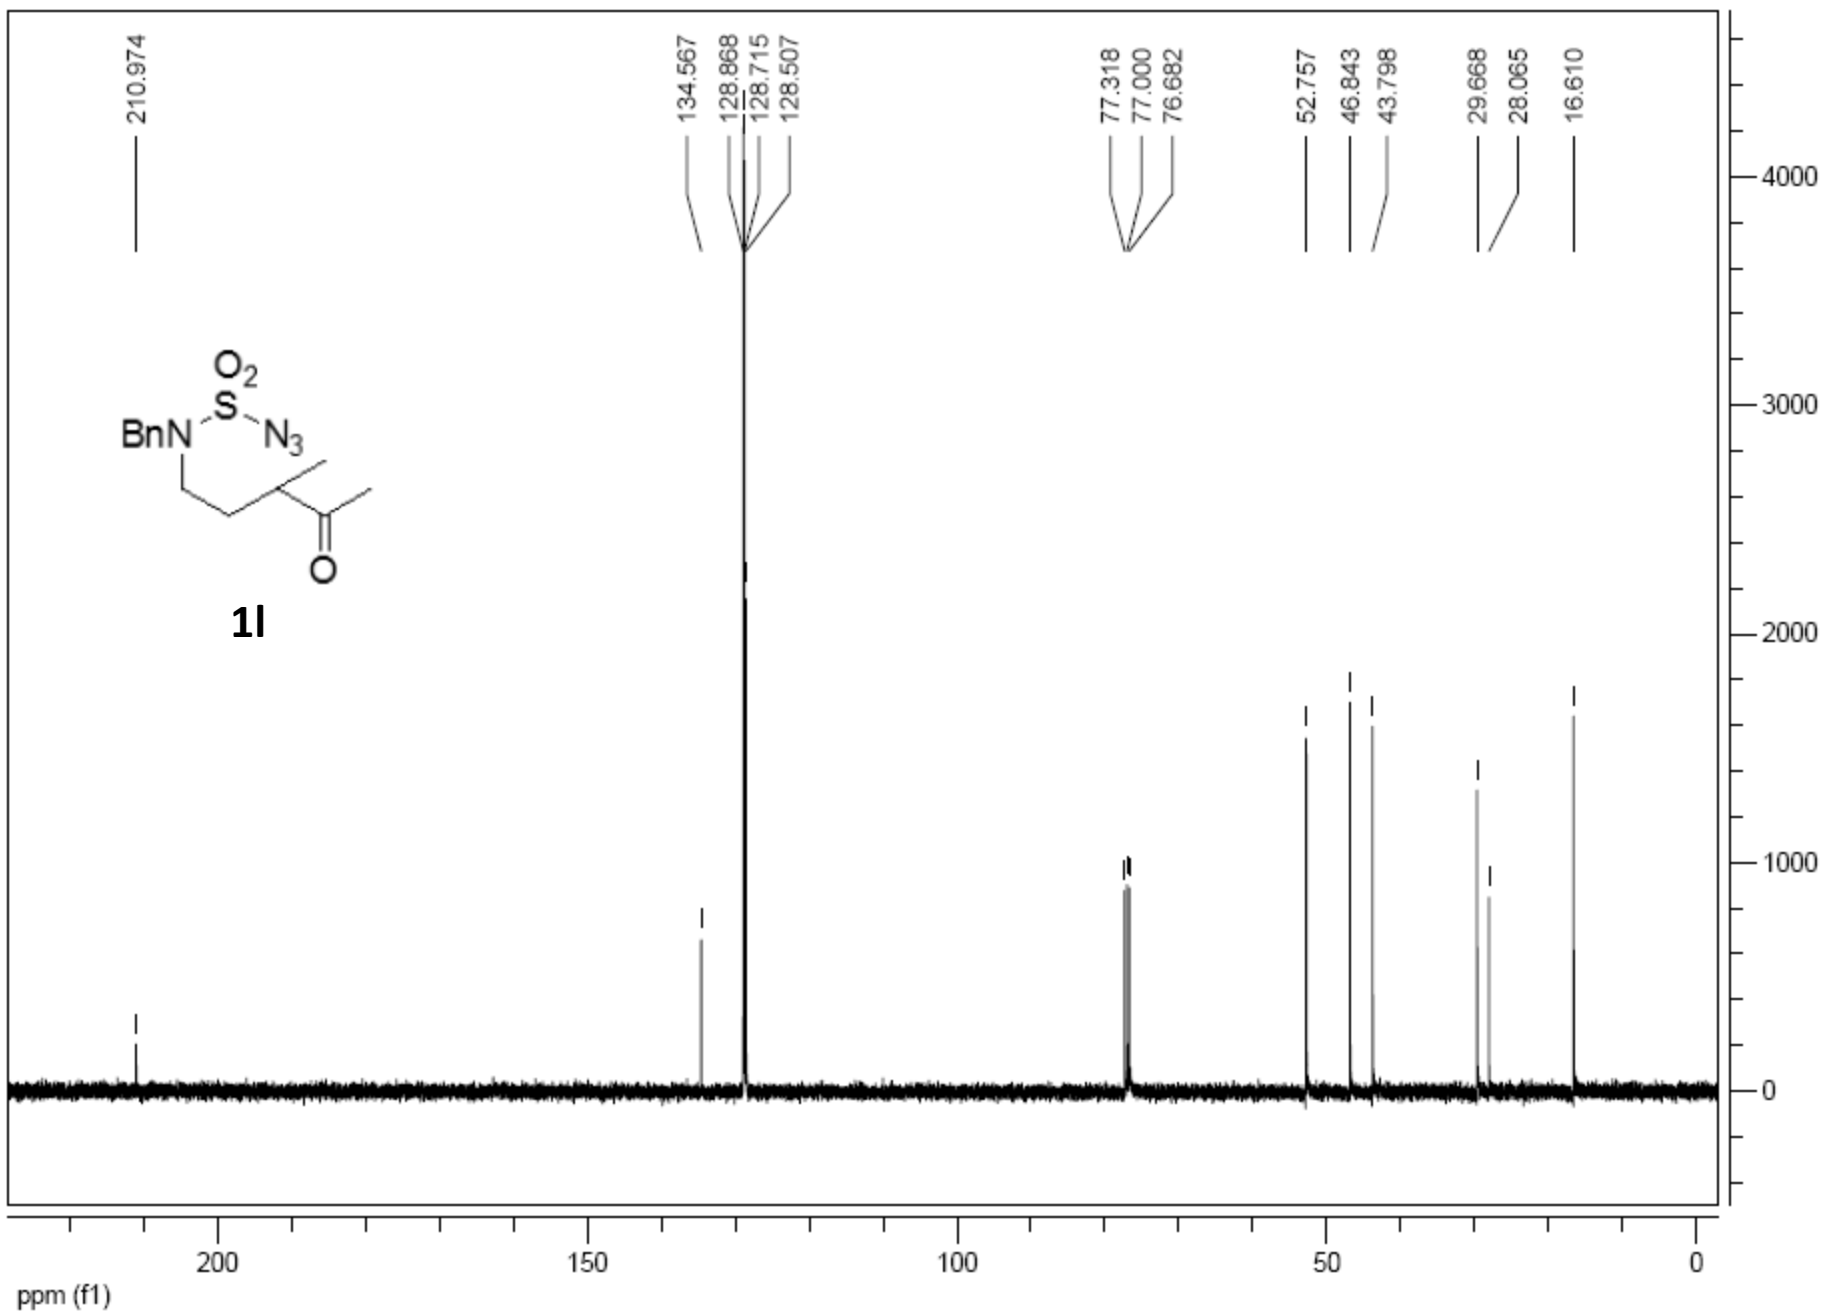



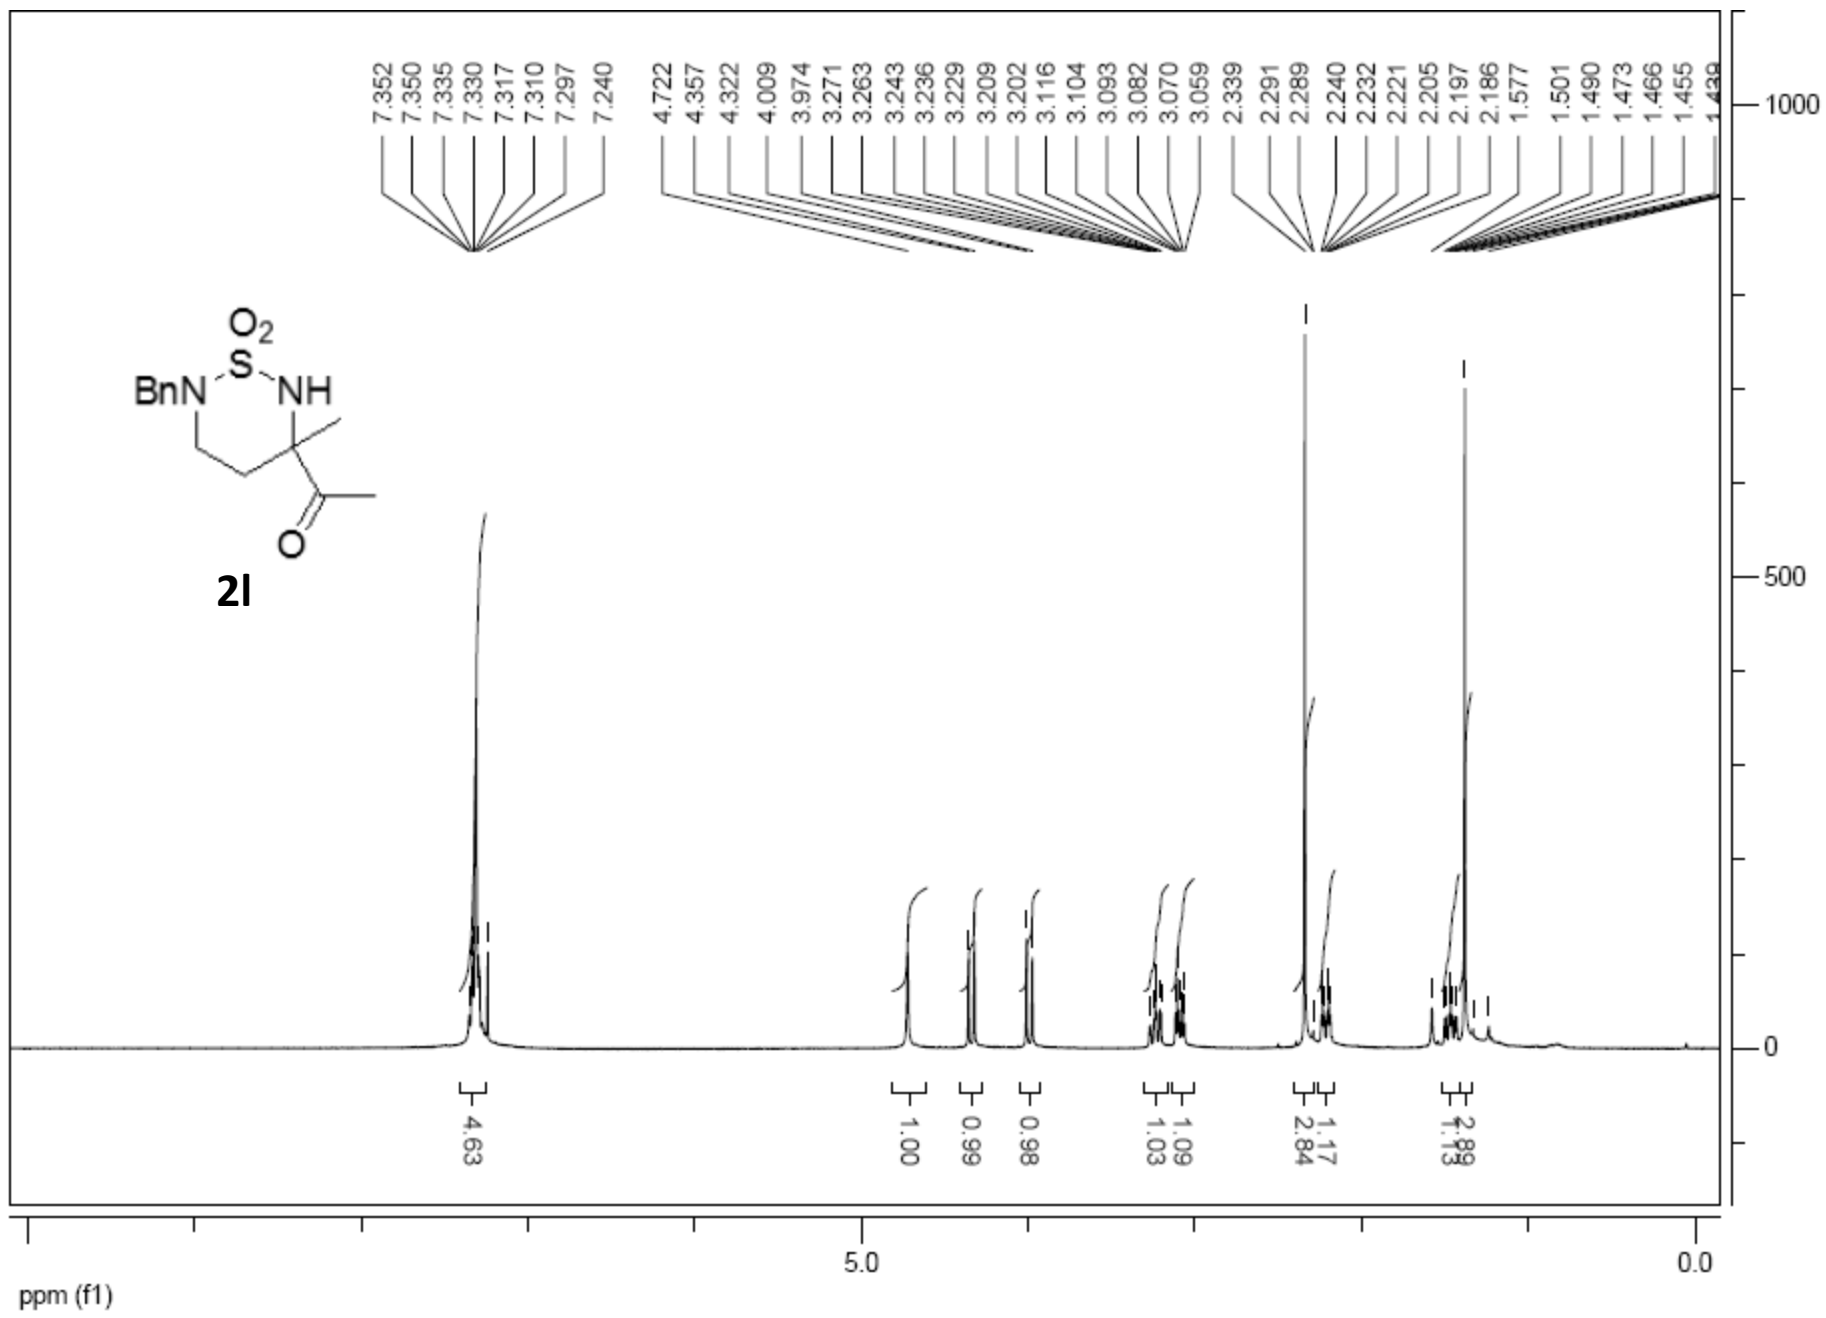

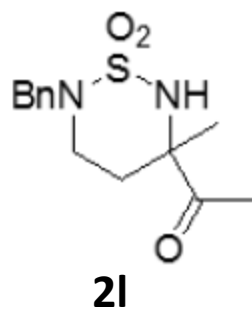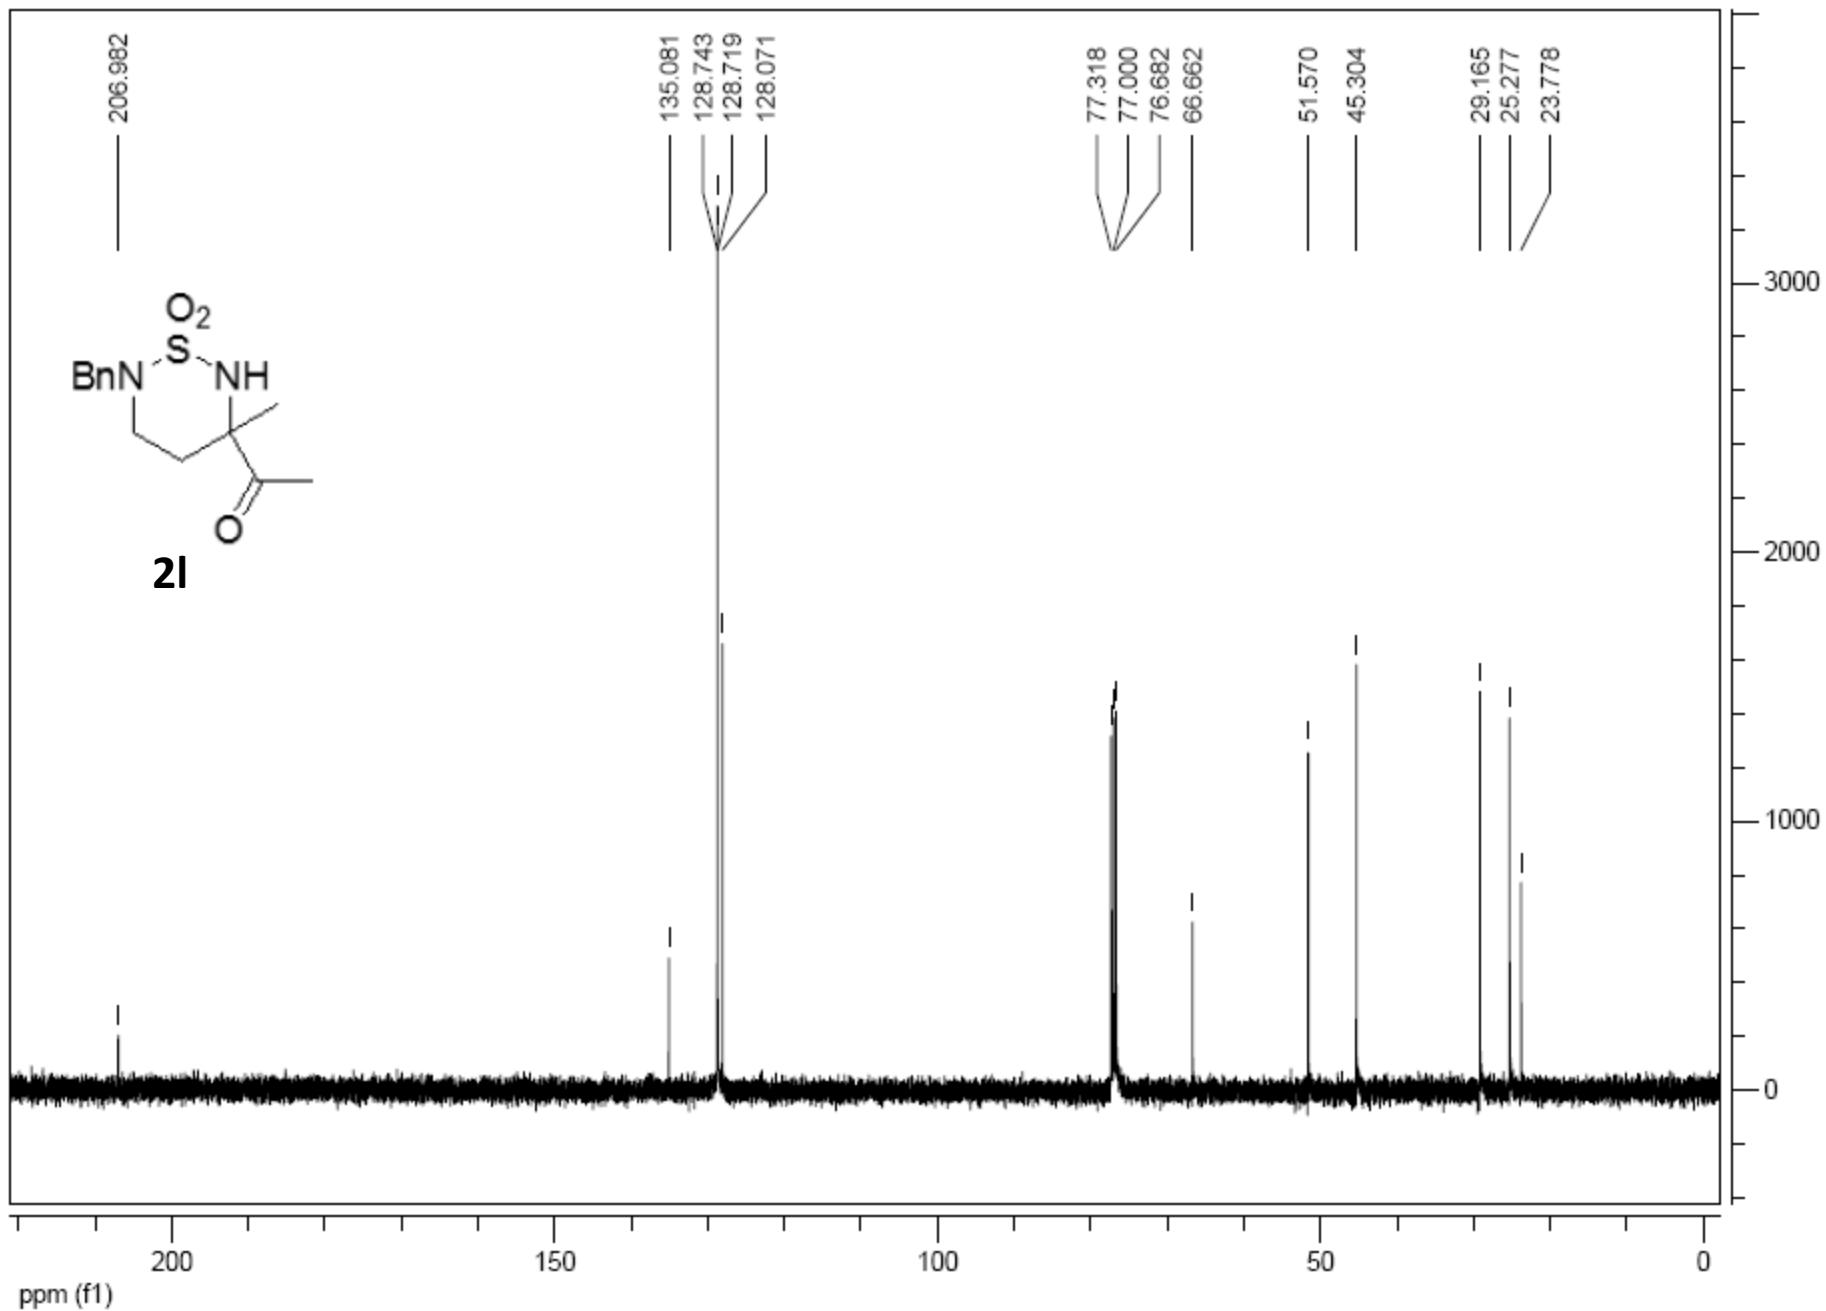

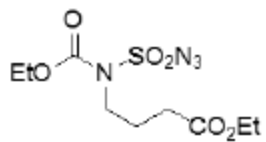

**1m**

7.242

5.258  
4.357  
4.339  
4.336  
4.321  
4.318  
4.303  
4.117  
4.099  
4.095  
4.081  
4.078  
4.063  
3.825  
3.807  
3.790  
2.329  
2.310  
2.292  
1.956  
1.938  
1.920  
1.357  
1.354  
1.339  
1.336  
1.321  
1.228  
1.225  
1.210

1500  
1000  
500  
0

2.00  
2.01  
1.98  
1.98  
2.03  
2.97  
3.13

ppm (f1)

5.0

0.0

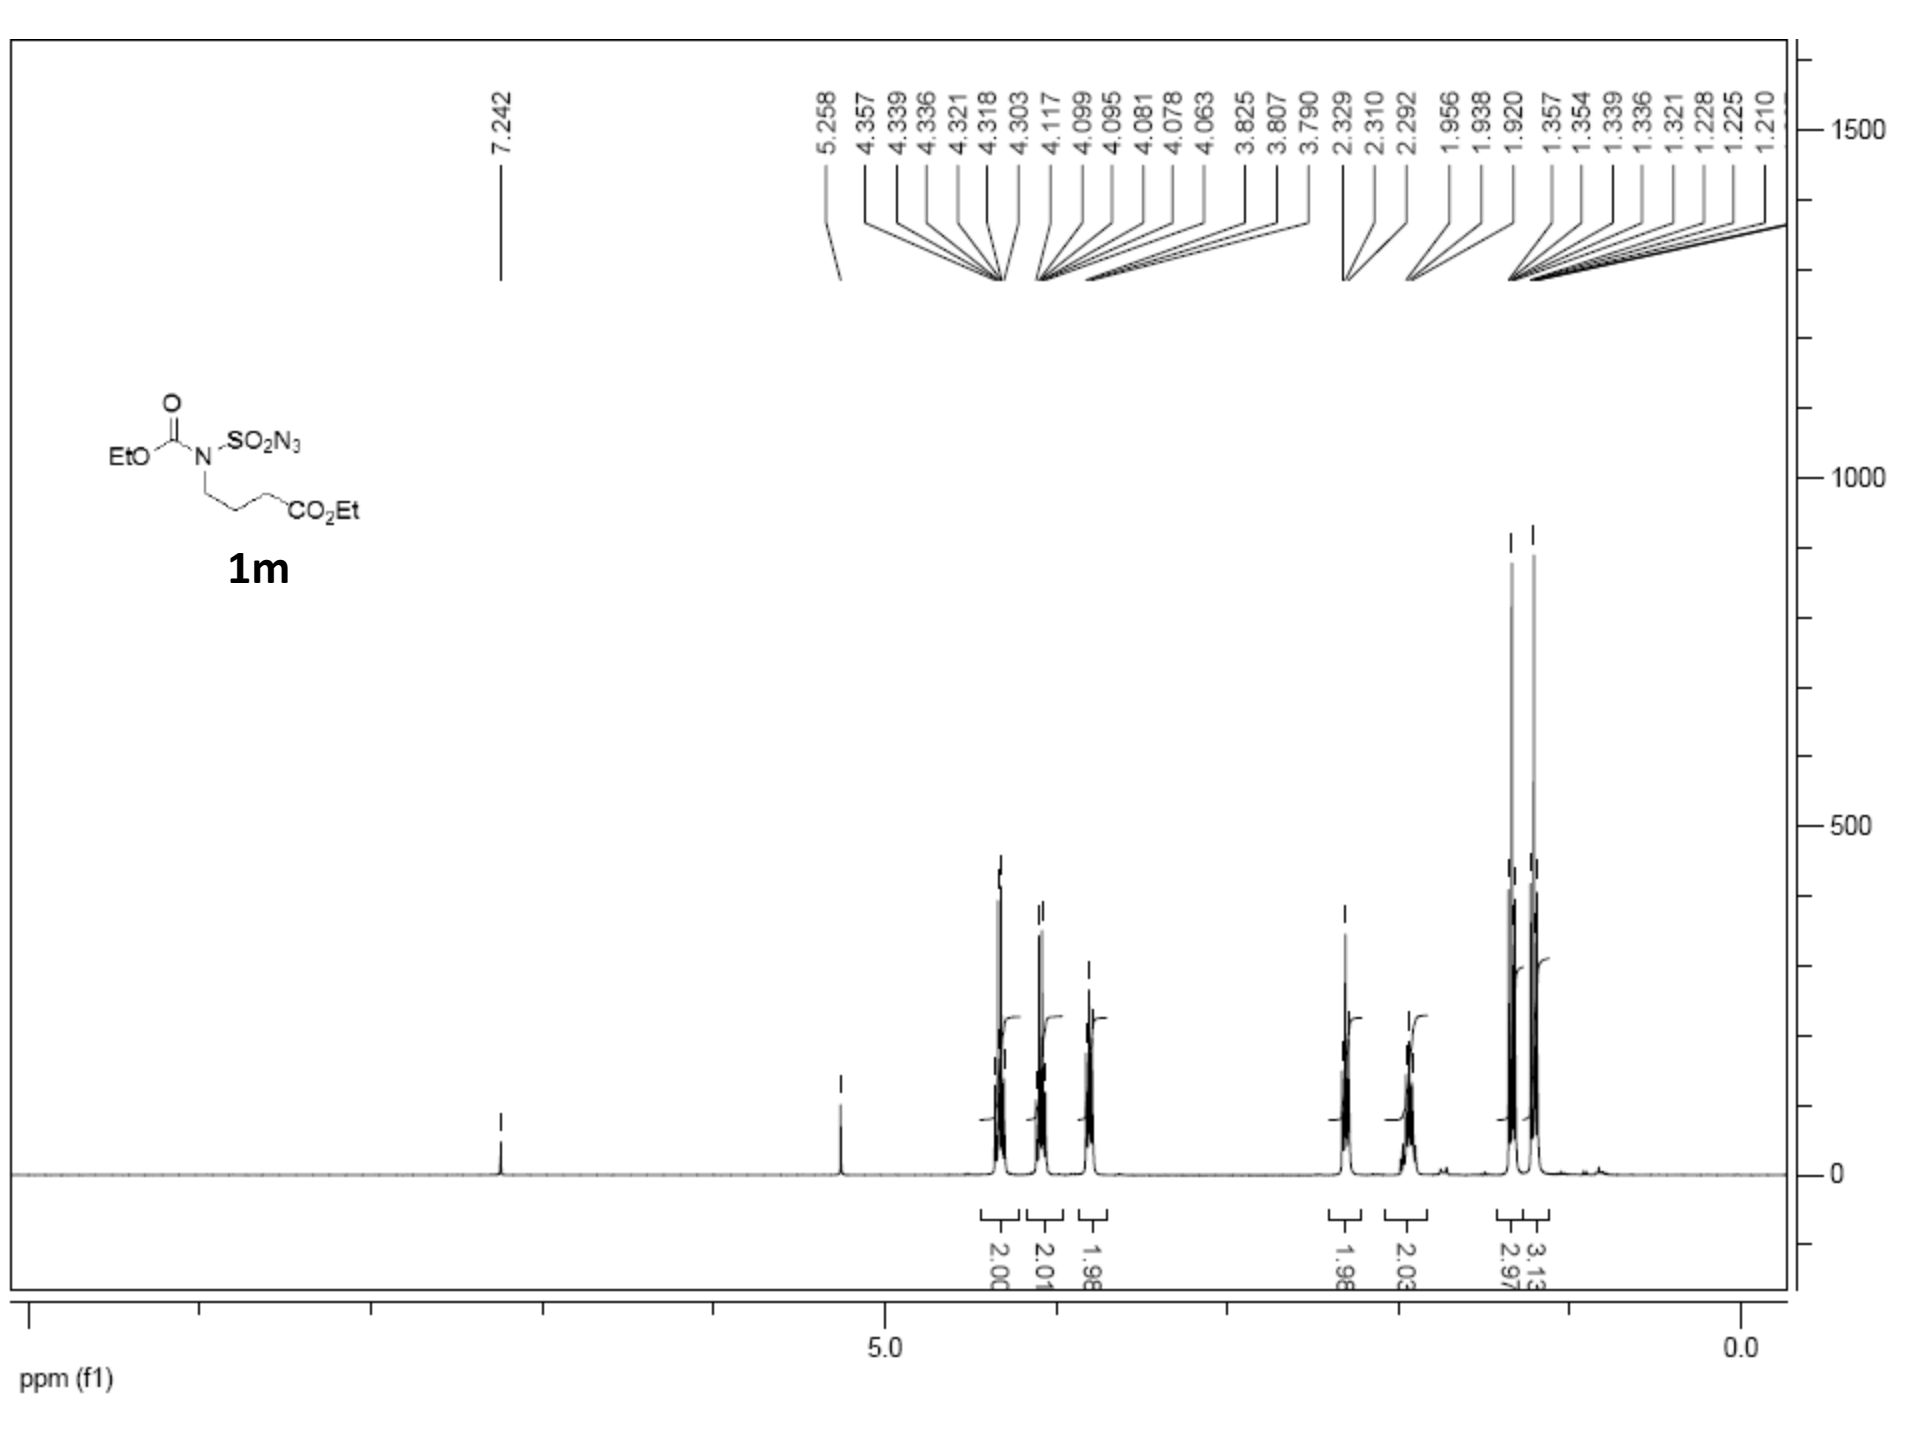

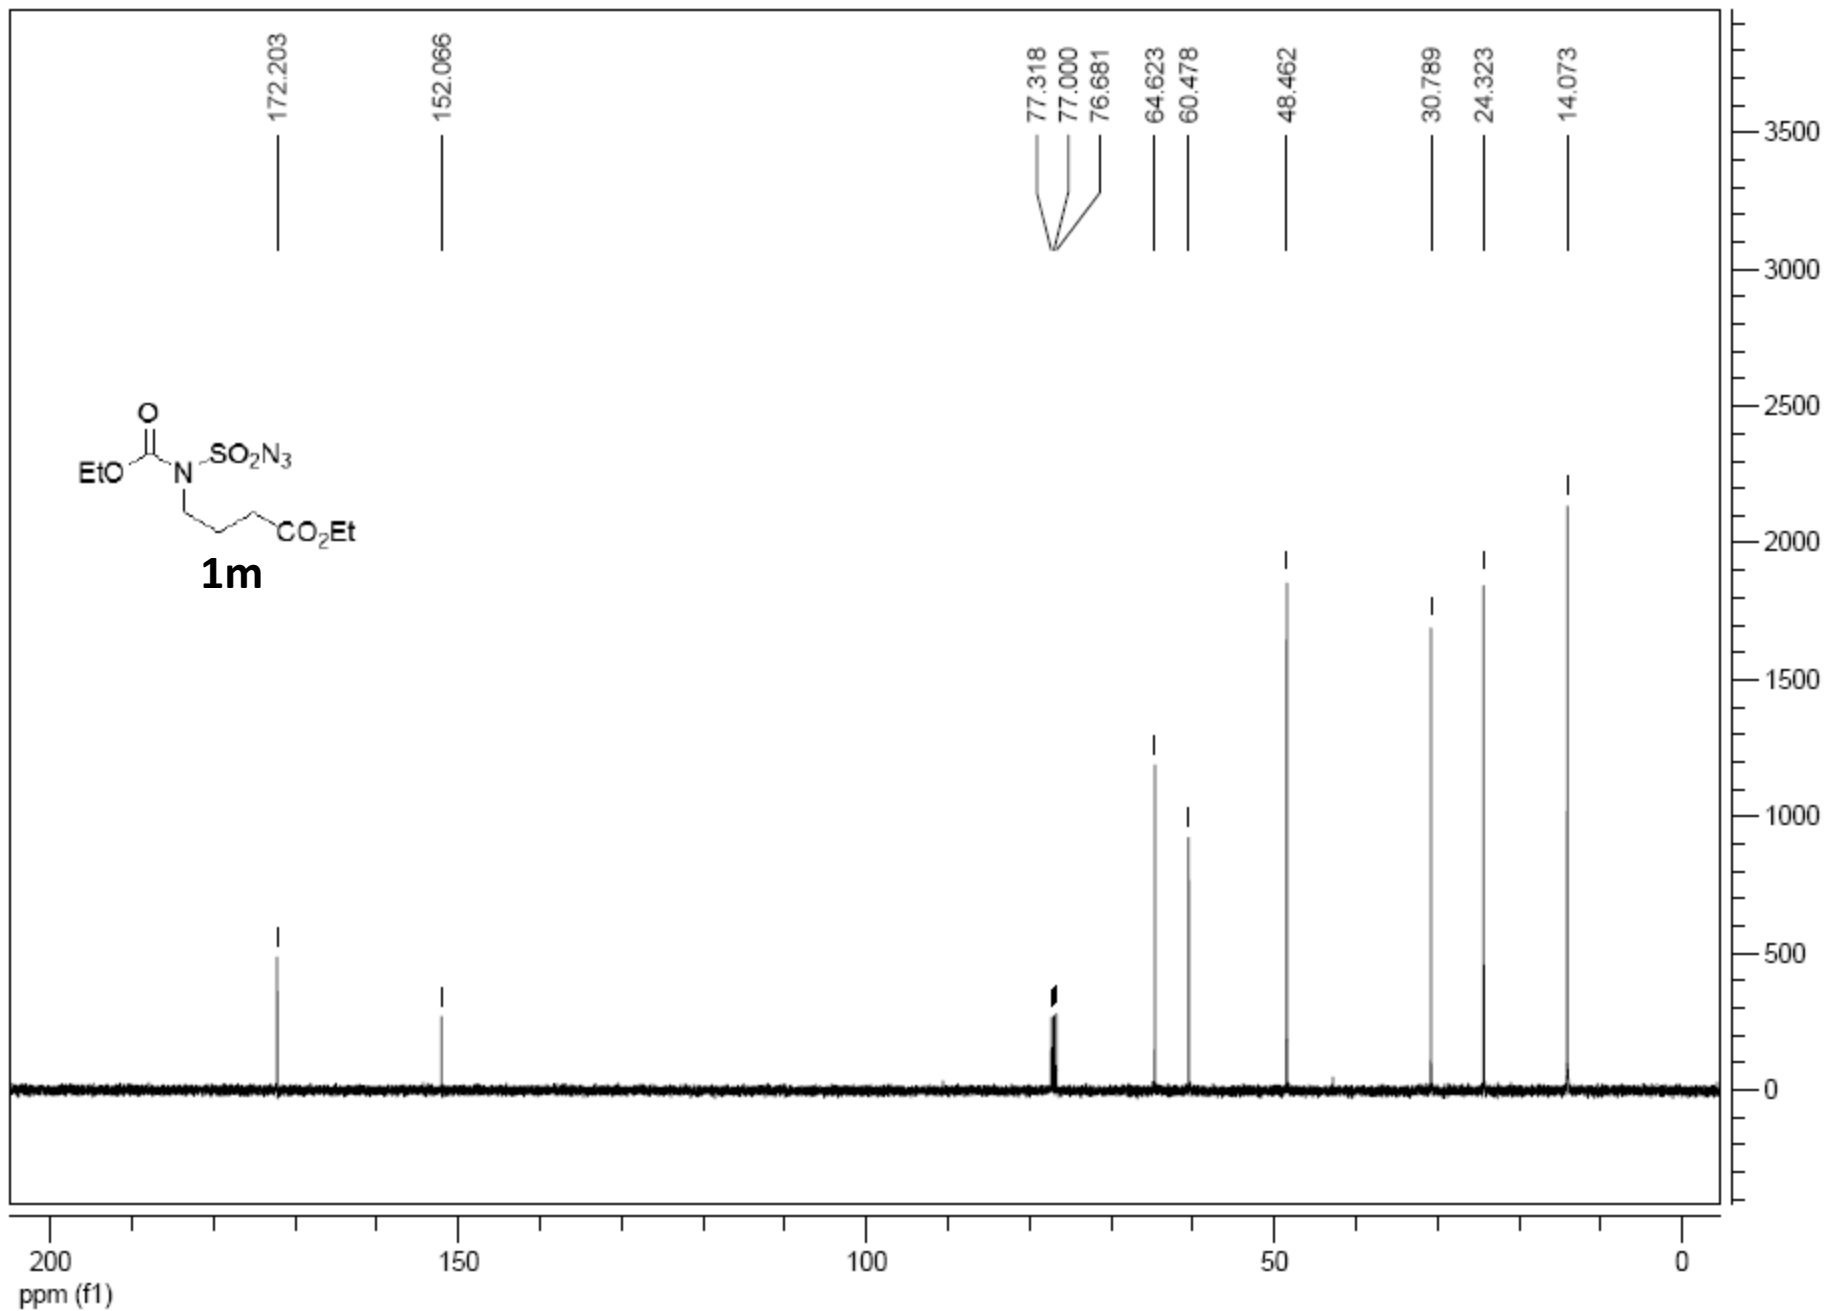

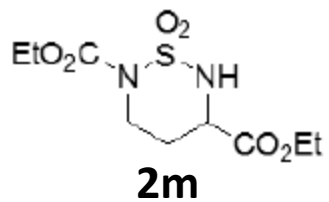

7.243  
 5.279  
 5.122  
 5.098  
 4.401  
 4.390  
 4.376  
 4.366  
 4.352  
 4.341  
 4.319  
 4.314  
 4.301  
 4.296  
 4.283  
 4.279  
 4.269  
 4.265  
 4.261  
 4.257  
 4.251  
 4.243  
 4.233  
 4.225  
 4.222  
 4.220  
 4.209  
 3.830  
 3.823  
 3.803  
 3.796  
 3.788  
 3.768  
 3.761  
 2.295  
 2.288  
 2.283  
 2.276  
 2.271  
 2.264  
 2.259  
 2.252  
 2.247  
 2.240  
 2.235  
 2.228  
 1.974  
 1.974  
 1.967  
 1.967  
 1.961  
 1.961  
 1.955  
 1.955  
 1.949  
 1.949  
 1.943  
 1.943  
 1.937  
 1.937  
 1.931  
 1.931  
 1.925  
 1.925  
 1.919  
 1.919  
 1.913  
 1.913  
 1.907  
 1.907  
 1.901  
 1.901  
 1.895  
 1.895  
 1.889  
 1.889  
 1.883  
 1.883  
 1.877  
 1.877  
 1.871  
 1.871  
 1.865  
 1.865  
 1.859  
 1.859  
 1.853  
 1.853  
 1.847  
 1.847  
 1.841  
 1.841  
 1.835  
 1.835  
 1.829  
 1.829  
 1.823  
 1.823  
 1.817  
 1.817  
 1.811  
 1.811  
 1.805  
 1.805  
 1.799  
 1.799  
 1.793  
 1.793  
 1.787  
 1.787  
 1.781  
 1.781  
 1.775  
 1.775  
 1.769  
 1.769  
 1.763  
 1.763  
 1.757  
 1.757  
 1.751  
 1.751  
 1.745  
 1.745  
 1.739  
 1.739  
 1.733  
 1.733  
 1.727  
 1.727  
 1.721  
 1.721  
 1.715  
 1.715  
 1.709  
 1.709  
 1.703  
 1.703  
 1.697  
 1.697  
 1.691  
 1.691  
 1.685  
 1.685  
 1.679  
 1.679  
 1.673  
 1.673  
 1.667  
 1.667  
 1.661  
 1.661  
 1.655  
 1.655  
 1.649  
 1.649  
 1.643  
 1.643  
 1.637  
 1.637  
 1.631  
 1.631  
 1.625  
 1.625  
 1.619  
 1.619  
 1.613  
 1.613  
 1.607  
 1.607  
 1.601  
 1.601  
 1.595  
 1.595  
 1.589  
 1.589  
 1.583  
 1.583  
 1.577  
 1.577  
 1.571  
 1.571  
 1.565  
 1.565  
 1.559  
 1.559  
 1.553  
 1.553  
 1.547  
 1.547  
 1.541  
 1.541  
 1.535  
 1.535  
 1.529  
 1.529  
 1.523  
 1.523  
 1.517  
 1.517  
 1.511  
 1.511  
 1.505  
 1.505  
 1.499  
 1.499  
 1.493  
 1.493  
 1.487  
 1.487  
 1.481  
 1.481  
 1.475  
 1.475  
 1.469  
 1.469  
 1.463  
 1.463  
 1.457  
 1.457  
 1.451  
 1.451  
 1.445  
 1.445  
 1.439  
 1.439  
 1.433  
 1.433  
 1.427  
 1.427  
 1.421  
 1.421  
 1.415  
 1.415  
 1.409  
 1.409  
 1.403  
 1.403  
 1.397  
 1.397  
 1.391  
 1.391  
 1.385  
 1.385  
 1.379  
 1.379  
 1.373  
 1.373  
 1.367  
 1.367  
 1.361  
 1.361  
 1.355  
 1.355  
 1.349  
 1.349  
 1.343  
 1.343  
 1.337  
 1.337  
 1.331  
 1.331  
 1.325  
 1.325  
 1.319  
 1.319  
 1.313  
 1.313  
 1.307  
 1.307  
 1.301  
 1.301  
 1.295  
 1.295  
 1.289  
 1.289  
 1.283  
 1.283  
 1.277  
 1.277  
 1.271  
 1.271  
 1.265  
 1.265  
 1.259  
 1.259  
 1.253  
 1.253  
 1.247  
 1.247  
 1.241  
 1.241  
 1.235  
 1.235  
 1.229  
 1.229  
 1.223  
 1.223  
 1.217  
 1.217  
 1.211  
 1.211  
 1.205  
 1.205  
 1.199  
 1.199  
 1.193  
 1.193  
 1.187  
 1.187  
 1.181  
 1.181  
 1.175  
 1.175  
 1.169  
 1.169  
 1.163  
 1.163  
 1.157  
 1.157  
 1.151  
 1.151  
 1.145  
 1.145  
 1.139  
 1.139  
 1.133  
 1.133  
 1.127  
 1.127  
 1.121  
 1.121  
 1.115  
 1.115  
 1.109  
 1.109  
 1.103  
 1.103  
 1.097  
 1.097  
 1.091  
 1.091  
 1.085  
 1.085  
 1.079  
 1.079  
 1.073  
 1.073  
 1.067  
 1.067  
 1.061  
 1.061  
 1.055  
 1.055  
 1.049  
 1.049  
 1.043  
 1.043  
 1.037  
 1.037  
 1.031  
 1.031  
 1.025  
 1.025  
 1.019  
 1.019  
 1.013  
 1.013  
 1.007  
 1.007  
 1.001  
 1.001  
 0.995  
 0.995  
 0.989  
 0.989  
 0.983  
 0.983  
 0.977  
 0.977  
 0.971  
 0.971  
 0.965  
 0.965  
 0.959  
 0.959  
 0.953  
 0.953  
 0.947  
 0.947  
 0.941  
 0.941  
 0.935  
 0.935  
 0.929  
 0.929  
 0.923  
 0.923  
 0.917  
 0.917  
 0.911  
 0.911  
 0.905  
 0.905  
 0.899  
 0.899  
 0.893  
 0.893  
 0.887  
 0.887  
 0.881  
 0.881  
 0.875  
 0.875  
 0.869  
 0.869  
 0.863  
 0.863  
 0.857  
 0.857  
 0.851  
 0.851  
 0.845  
 0.845  
 0.839  
 0.839  
 0.833  
 0.833  
 0.827  
 0.827  
 0.821  
 0.821  
 0.815  
 0.815  
 0.809  
 0.809  
 0.803  
 0.803  
 0.797  
 0.797  
 0.791  
 0.791  
 0.785  
 0.785  
 0.779  
 0.779  
 0.773  
 0.773  
 0.767  
 0.767  
 0.761  
 0.761  
 0.755  
 0.755  
 0.749  
 0.749  
 0.743  
 0.743  
 0.737  
 0.737  
 0.731  
 0.731  
 0.725  
 0.725  
 0.719  
 0.719  
 0.713  
 0.713  
 0.707  
 0.707  
 0.701  
 0.701  
 0.695  
 0.695  
 0.689  
 0.689  
 0.683  
 0.683  
 0.677  
 0.677  
 0.671  
 0.671  
 0.665  
 0.665  
 0.659  
 0.659  
 0.653  
 0.653  
 0.647  
 0.647  
 0.641  
 0.641  
 0.635  
 0.635  
 0.629  
 0.629  
 0.623  
 0.623  
 0.617  
 0.617  
 0.611  
 0.611  
 0.605  
 0.605  
 0.599  
 0.599  
 0.593  
 0.593  
 0.587  
 0.587  
 0.581  
 0.581  
 0.575  
 0.575  
 0.569  
 0.569  
 0.563  
 0.563  
 0.557  
 0.557  
 0.551  
 0.551  
 0.545  
 0.545  
 0.539  
 0.539  
 0.533  
 0.533  
 0.527  
 0.527  
 0.521  
 0.521  
 0.515  
 0.515  
 0.509  
 0.509  
 0.503  
 0.503  
 0.497  
 0.497  
 0.491  
 0.491  
 0.485  
 0.485  
 0.479  
 0.479  
 0.473  
 0.473  
 0.467  
 0.467  
 0.461  
 0.461  
 0.455  
 0.455  
 0.449  
 0.449  
 0.443  
 0.443  
 0.437  
 0.437  
 0.431  
 0.431  
 0.425  
 0.425  
 0.419  
 0.419  
 0.413  
 0.413  
 0.407  
 0.407  
 0.401  
 0.401  
 0.395  
 0.395  
 0.389  
 0.389  
 0.383  
 0.383  
 0.377  
 0.377  
 0.371  
 0.371  
 0.365  
 0.365  
 0.359  
 0.359  
 0.353  
 0.353  
 0.347  
 0.347  
 0.341  
 0.341  
 0.335  
 0.335  
 0.329  
 0.329  
 0.323  
 0.323  
 0.317  
 0.317  
 0.311  
 0.311  
 0.305  
 0.305  
 0.299  
 0.299  
 0.293  
 0.293  
 0.287  
 0.287  
 0.281  
 0.281  
 0.275  
 0.275  
 0.269  
 0.269  
 0.263  
 0.263  
 0.257  
 0.257  
 0.251  
 0.251  
 0.245  
 0.245  
 0.239  
 0.239  
 0.233  
 0.233  
 0.227  
 0.227  
 0.221  
 0.221  
 0.215  
 0.215  
 0.209  
 0.209  
 0.203  
 0.203  
 0.197  
 0.197  
 0.191  
 0.191  
 0.185  
 0.185  
 0.179  
 0.179  
 0.173  
 0.173  
 0.167  
 0.167  
 0.161  
 0.161  
 0.155  
 0.155  
 0.149  
 0.149  
 0.143  
 0.143  
 0.137  
 0.137  
 0.131  
 0.131  
 0.125  
 0.125  
 0.119  
 0.119  
 0.113  
 0.113  
 0.107  
 0.107  
 0.101  
 0.101  
 0.095  
 0.095  
 0.089  
 0.089  
 0.083  
 0.083  
 0.077  
 0.077  
 0.071  
 0.071  
 0.065  
 0.065  
 0.059  
 0.059  
 0.053  
 0.053  
 0.047  
 0.047  
 0.041  
 0.041  
 0.035  
 0.035  
 0.029  
 0.029  
 0.023  
 0.023  
 0.017  
 0.017  
 0.011  
 0.011  
 0.005  
 0.005

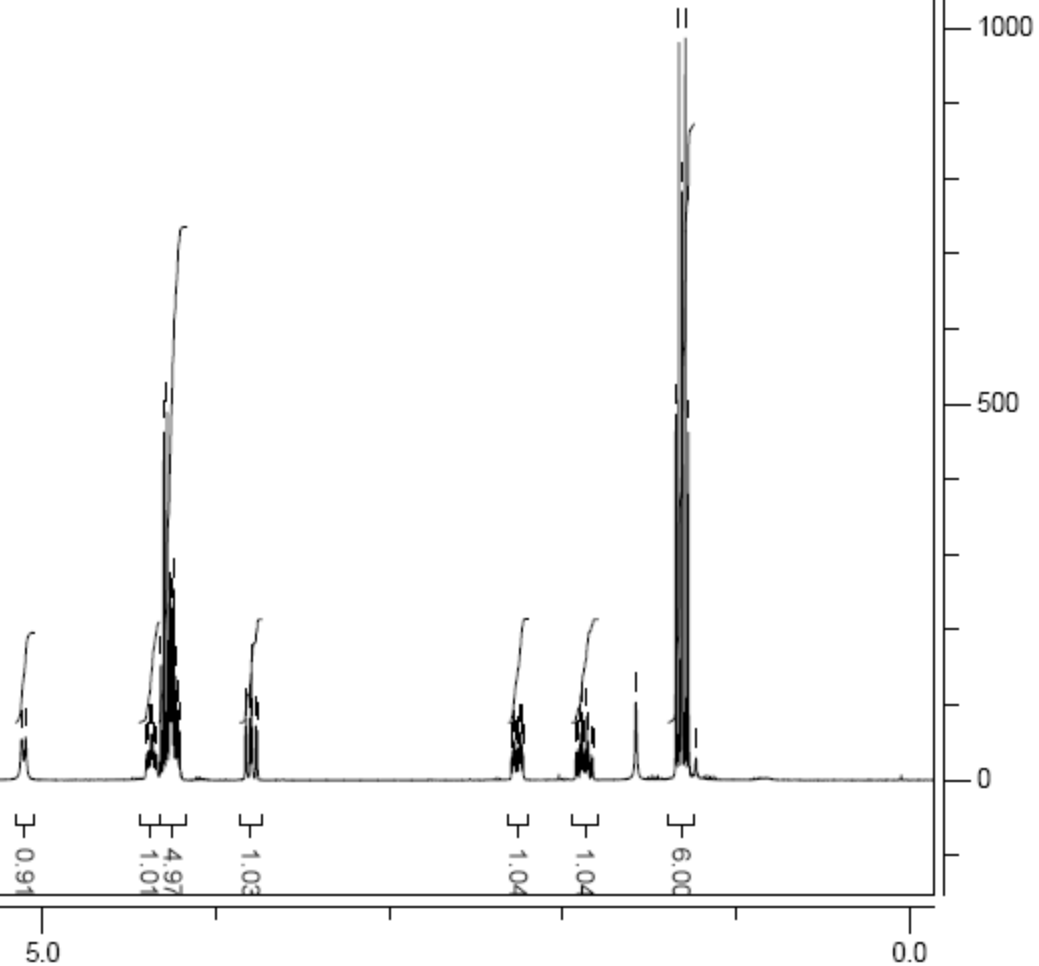

ppm (f1)

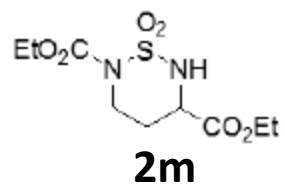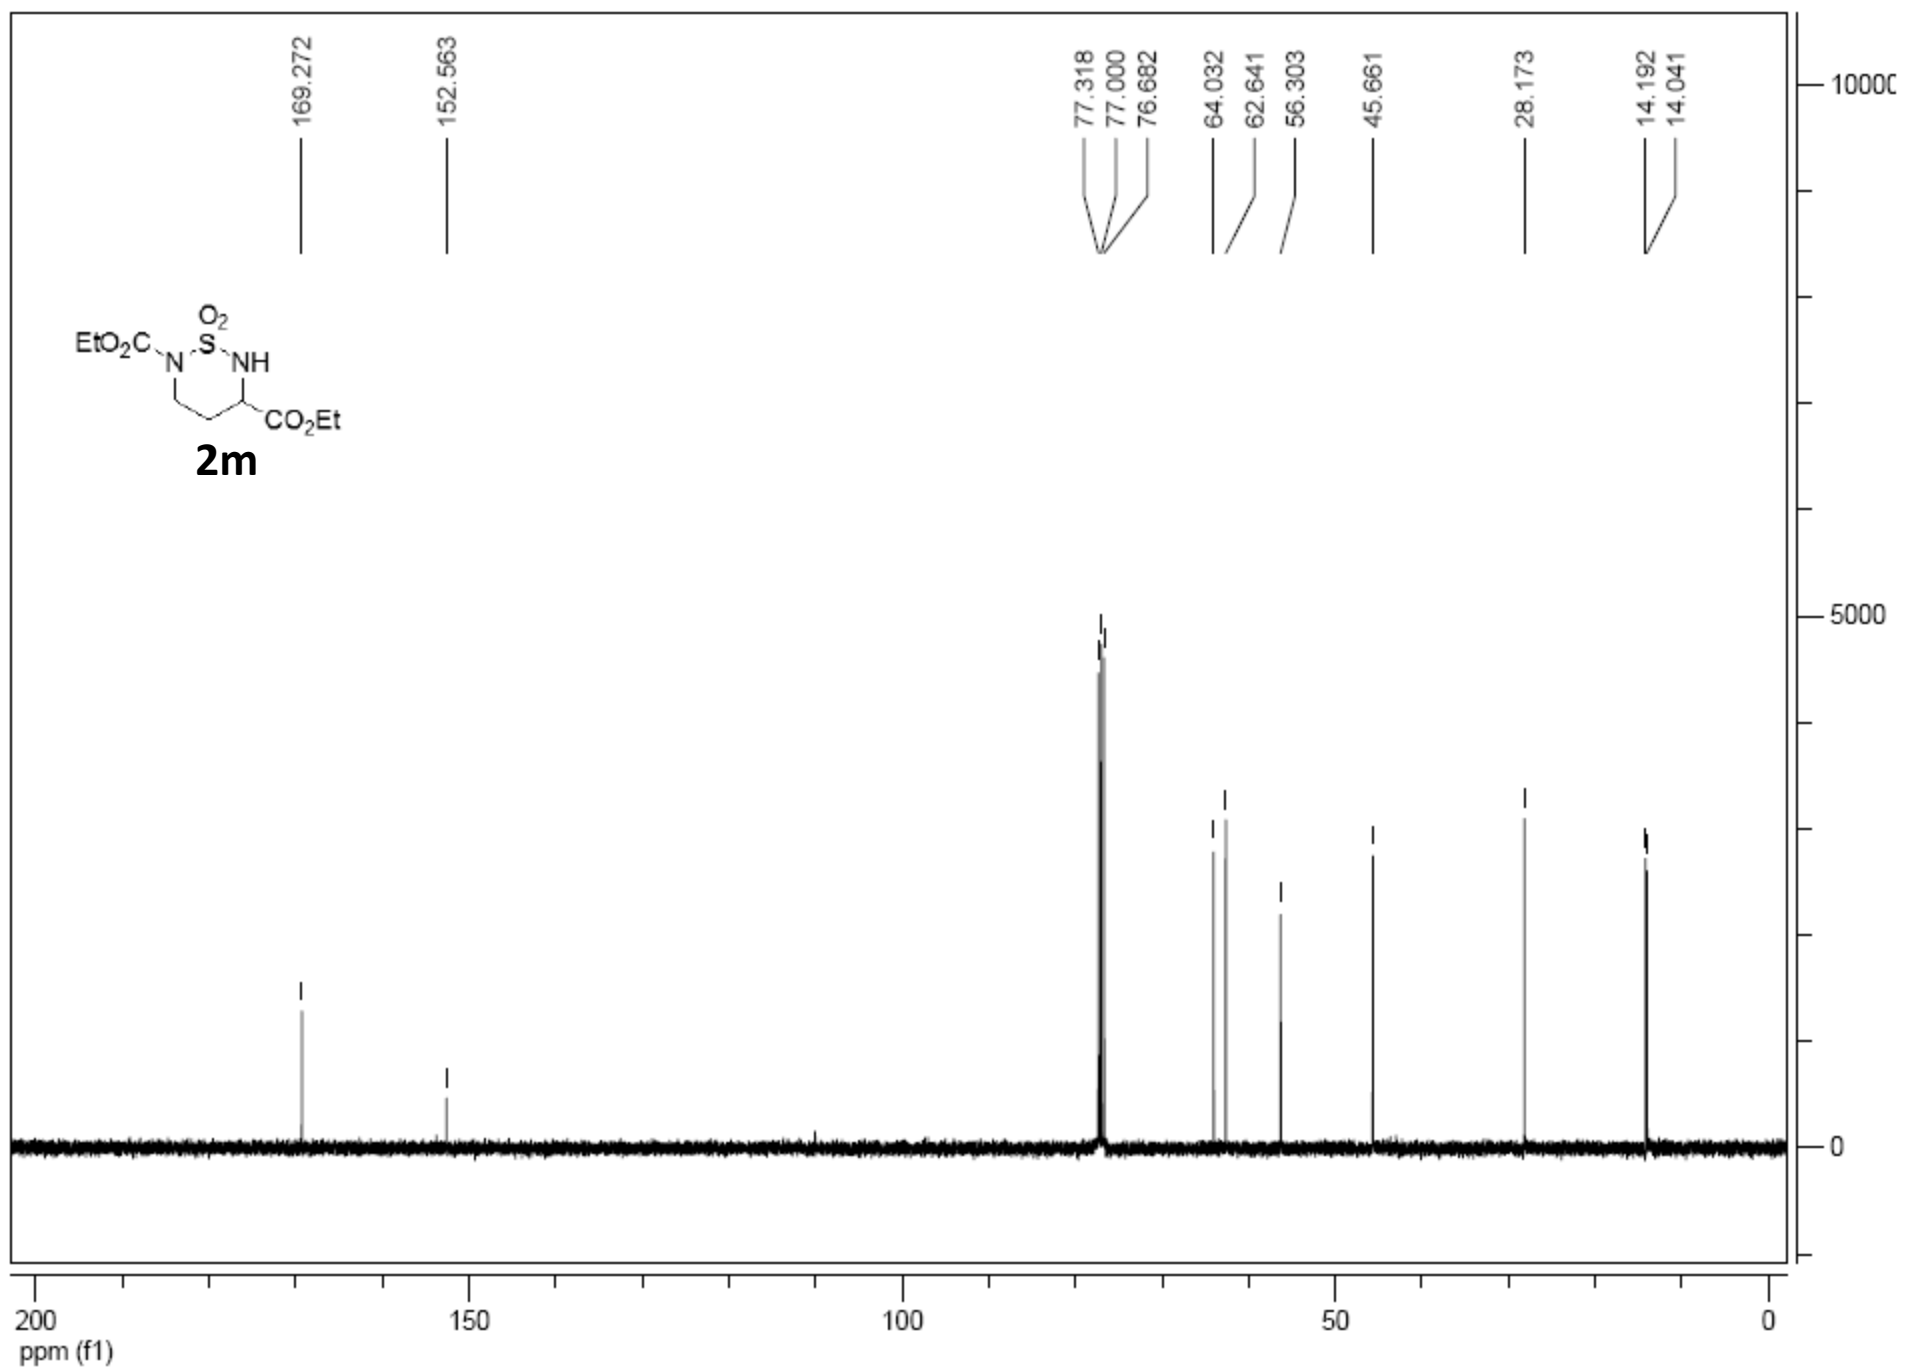

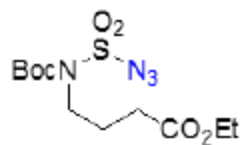

**1n**

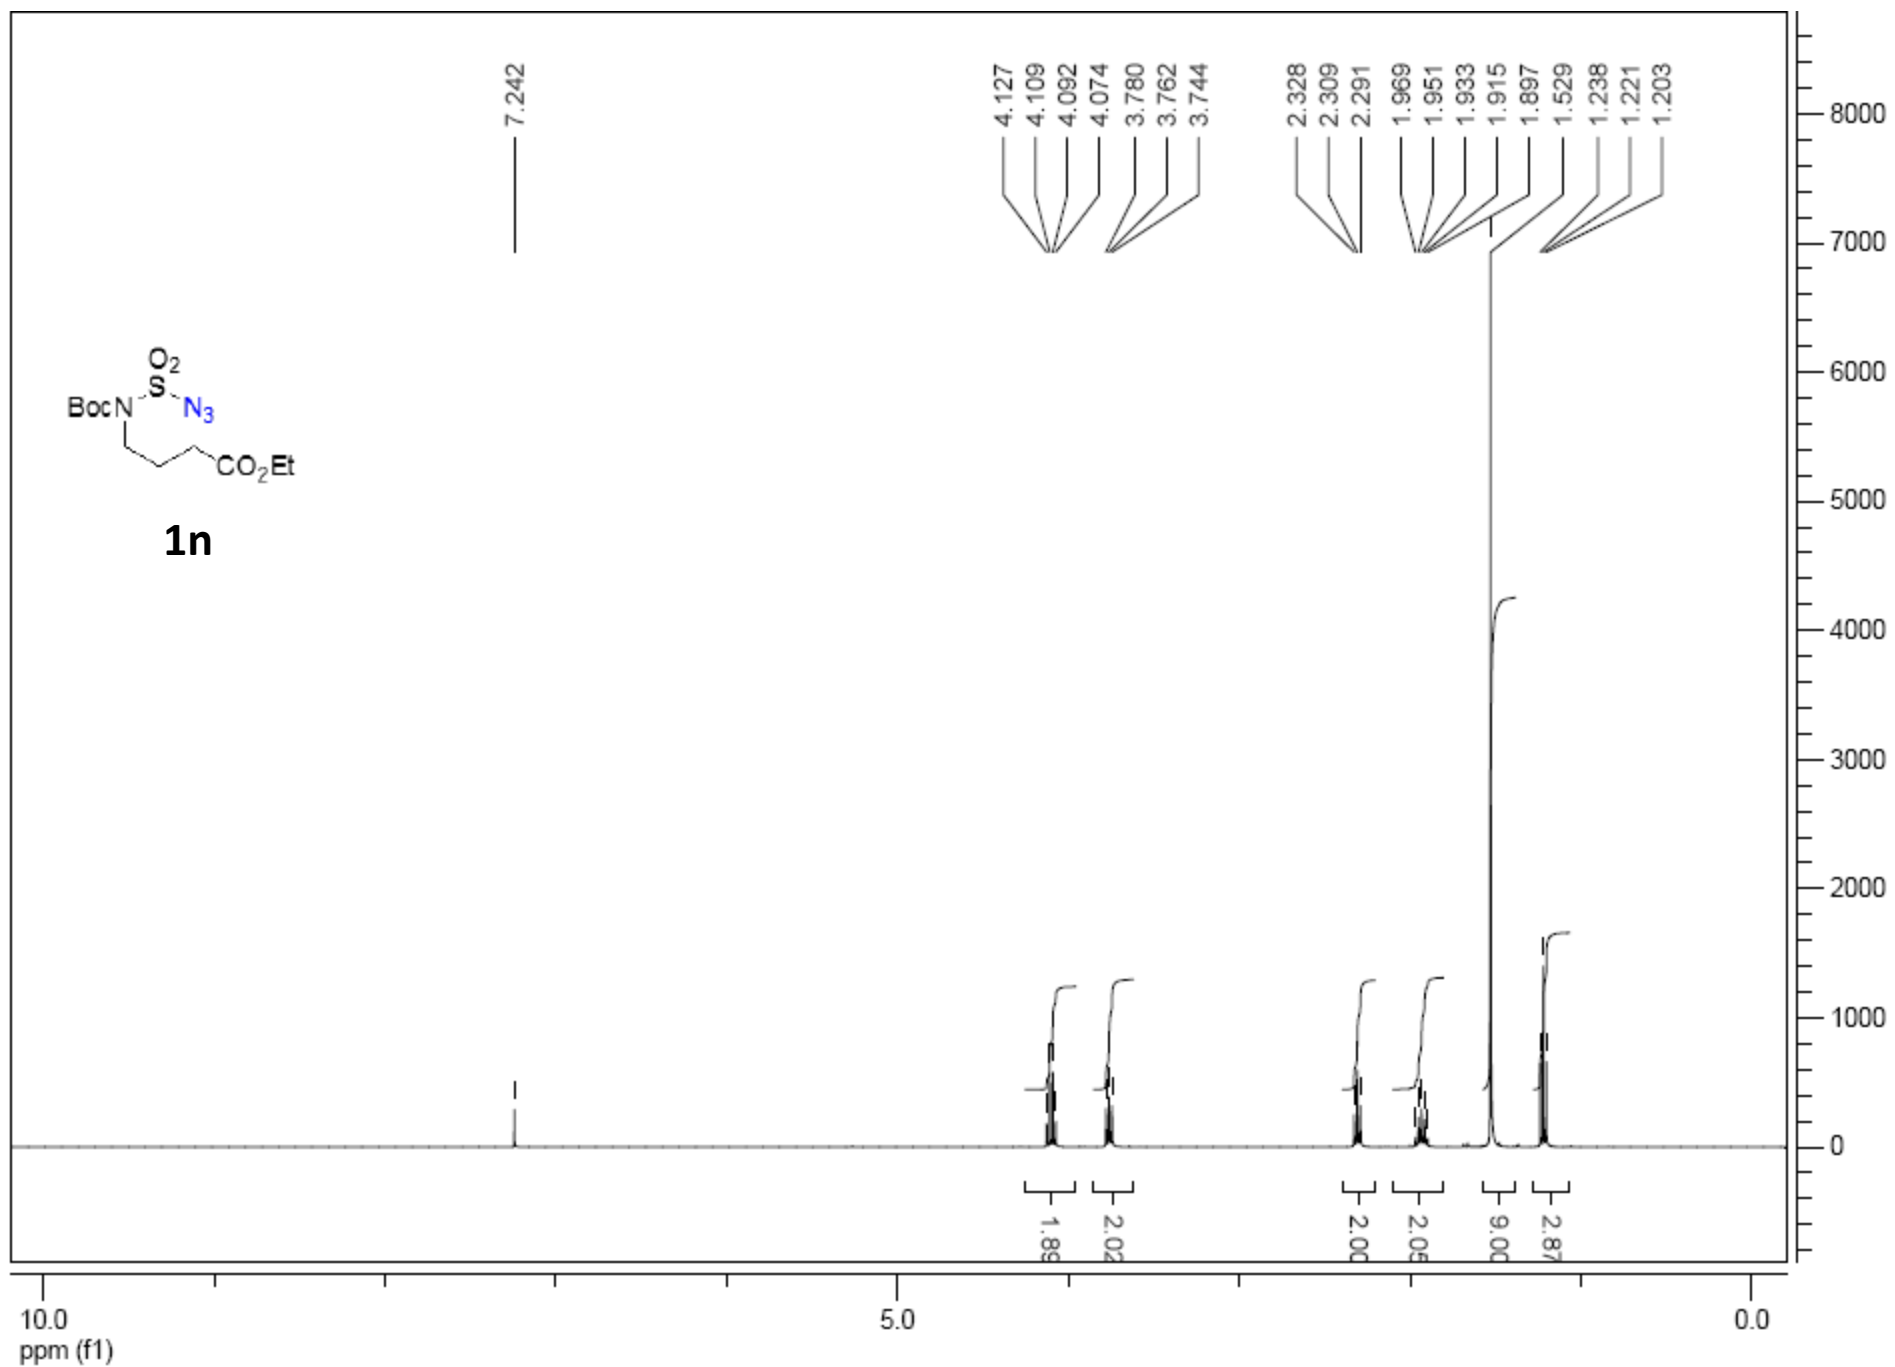

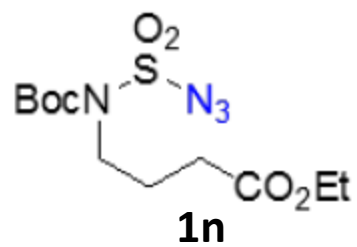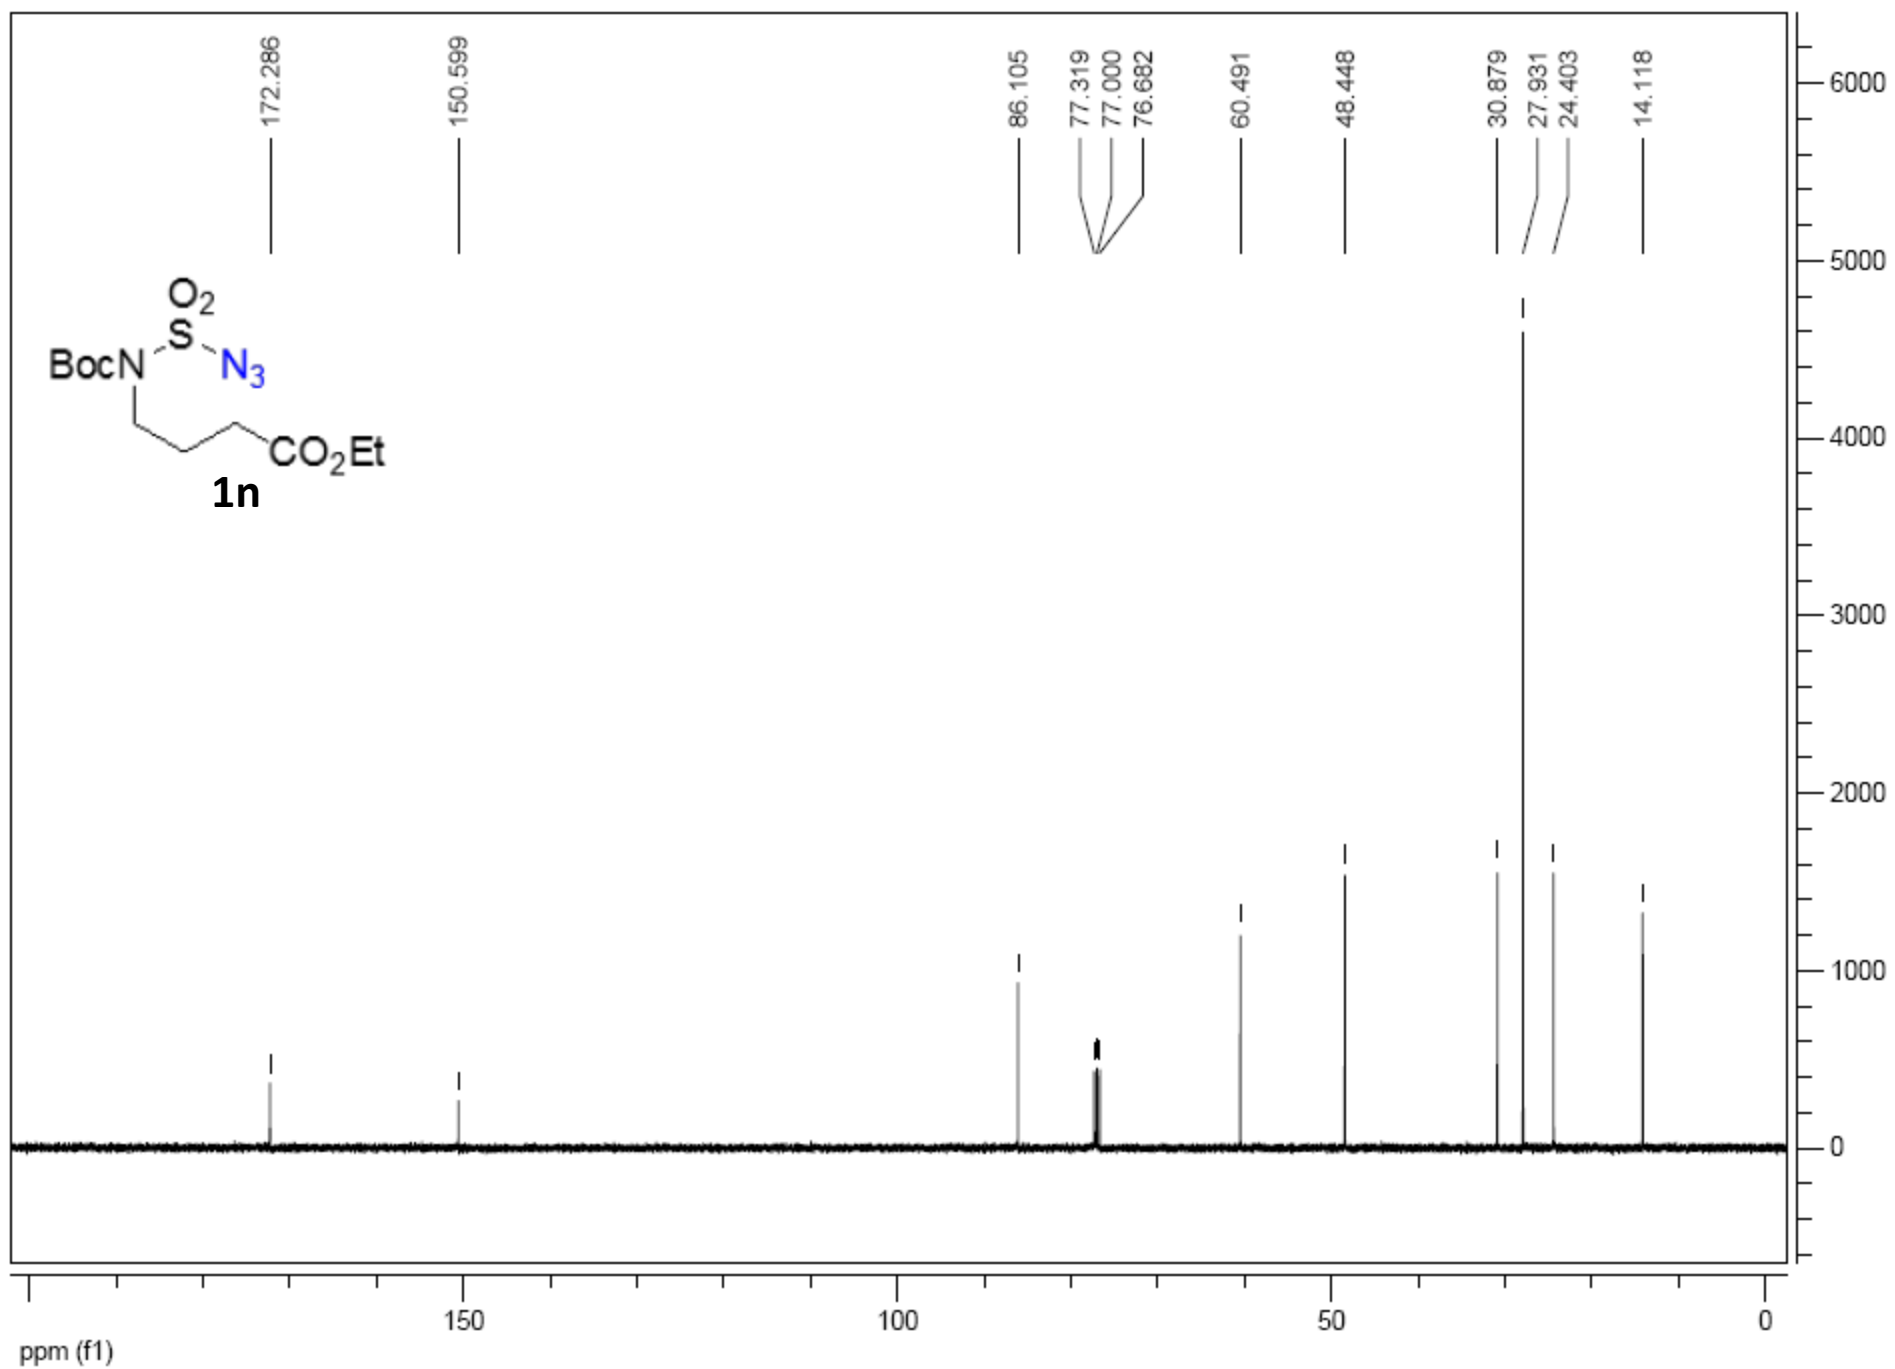



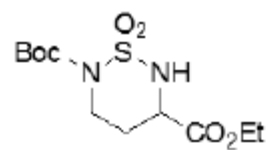

**2n**

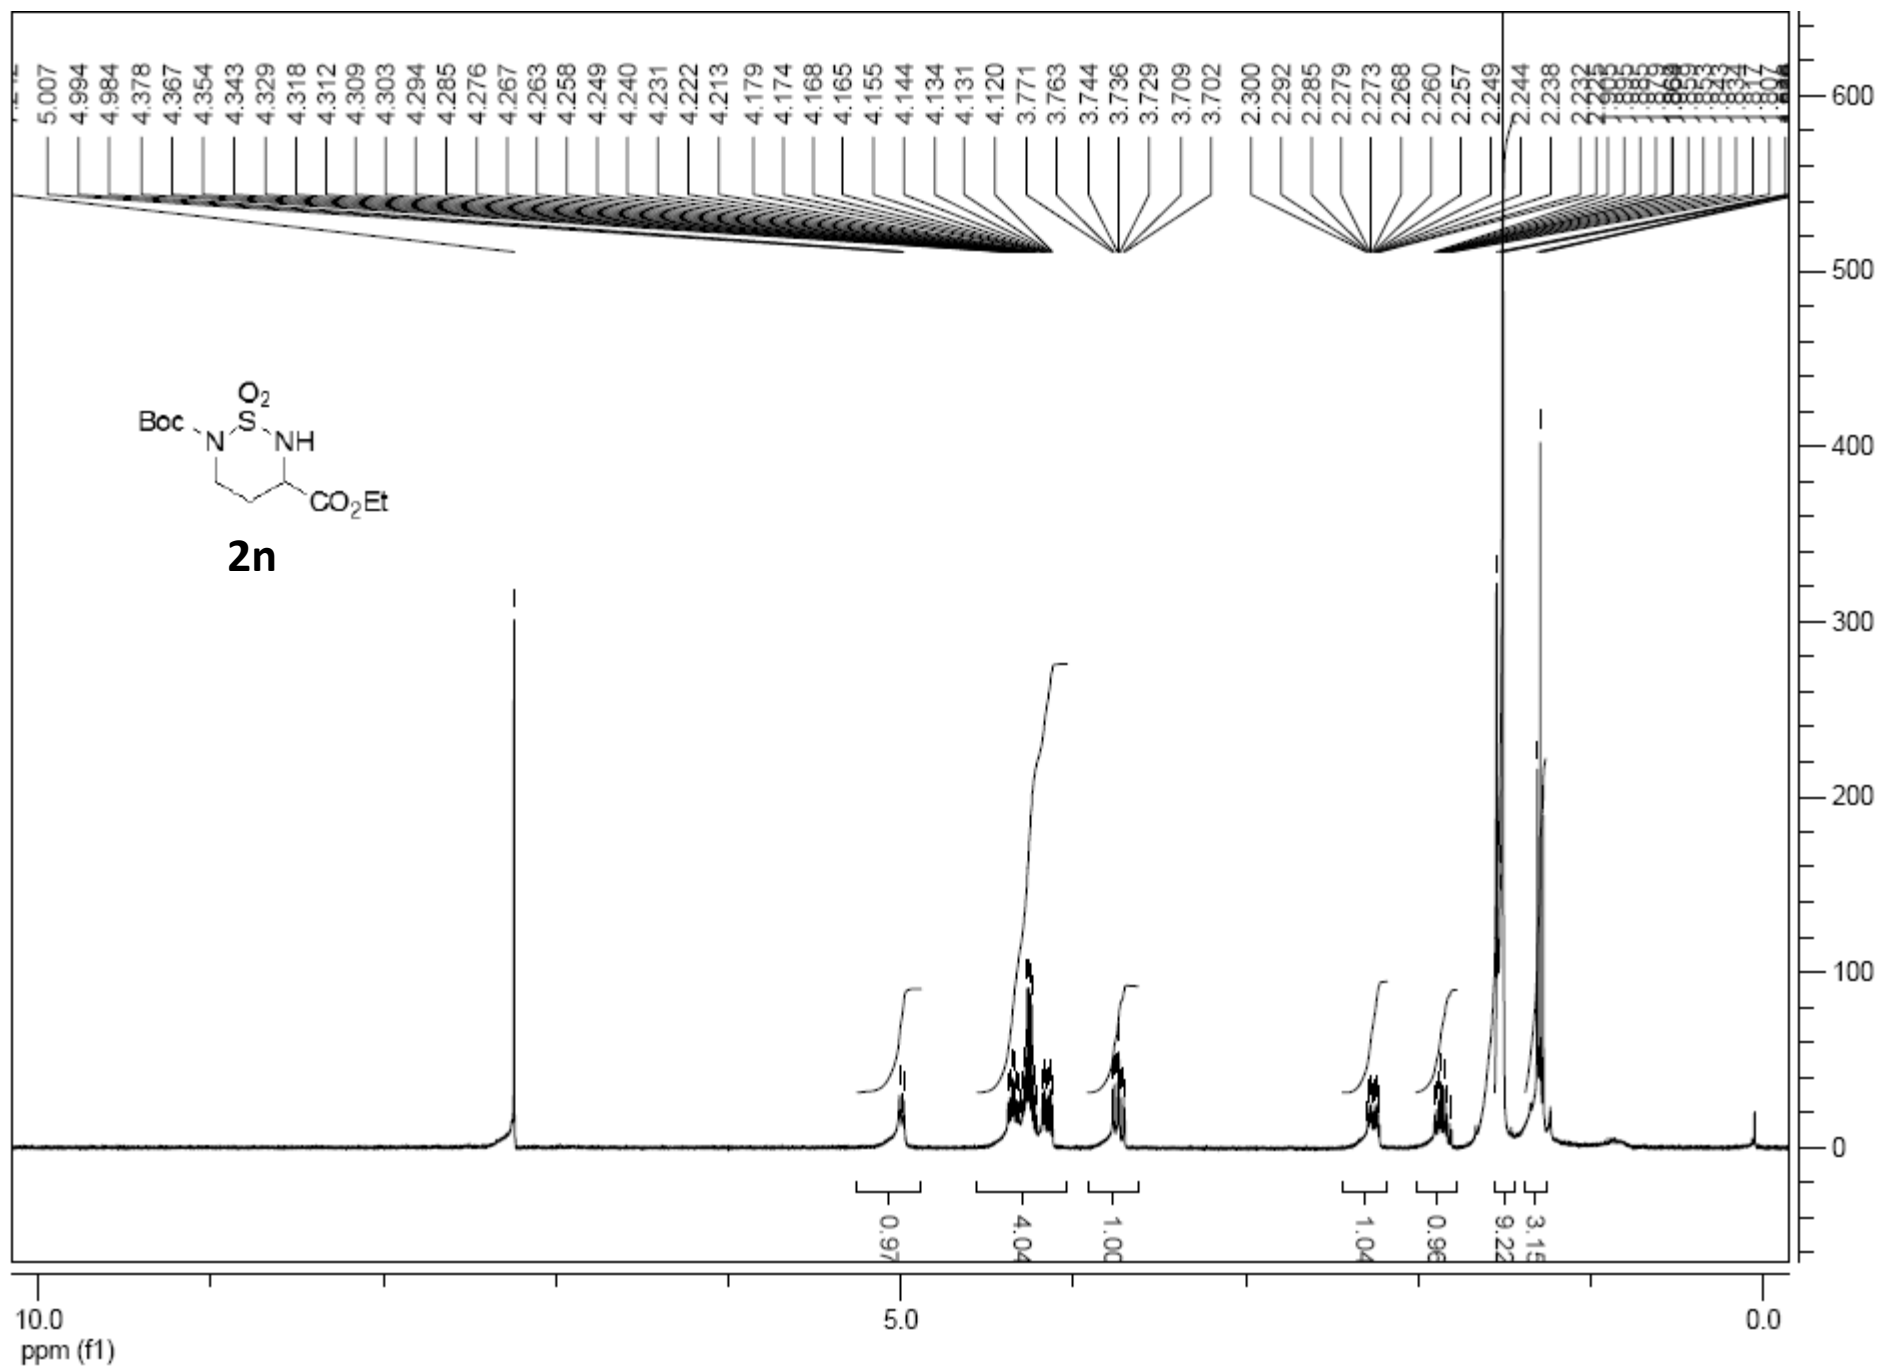

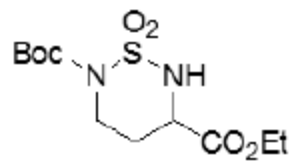

**2n**

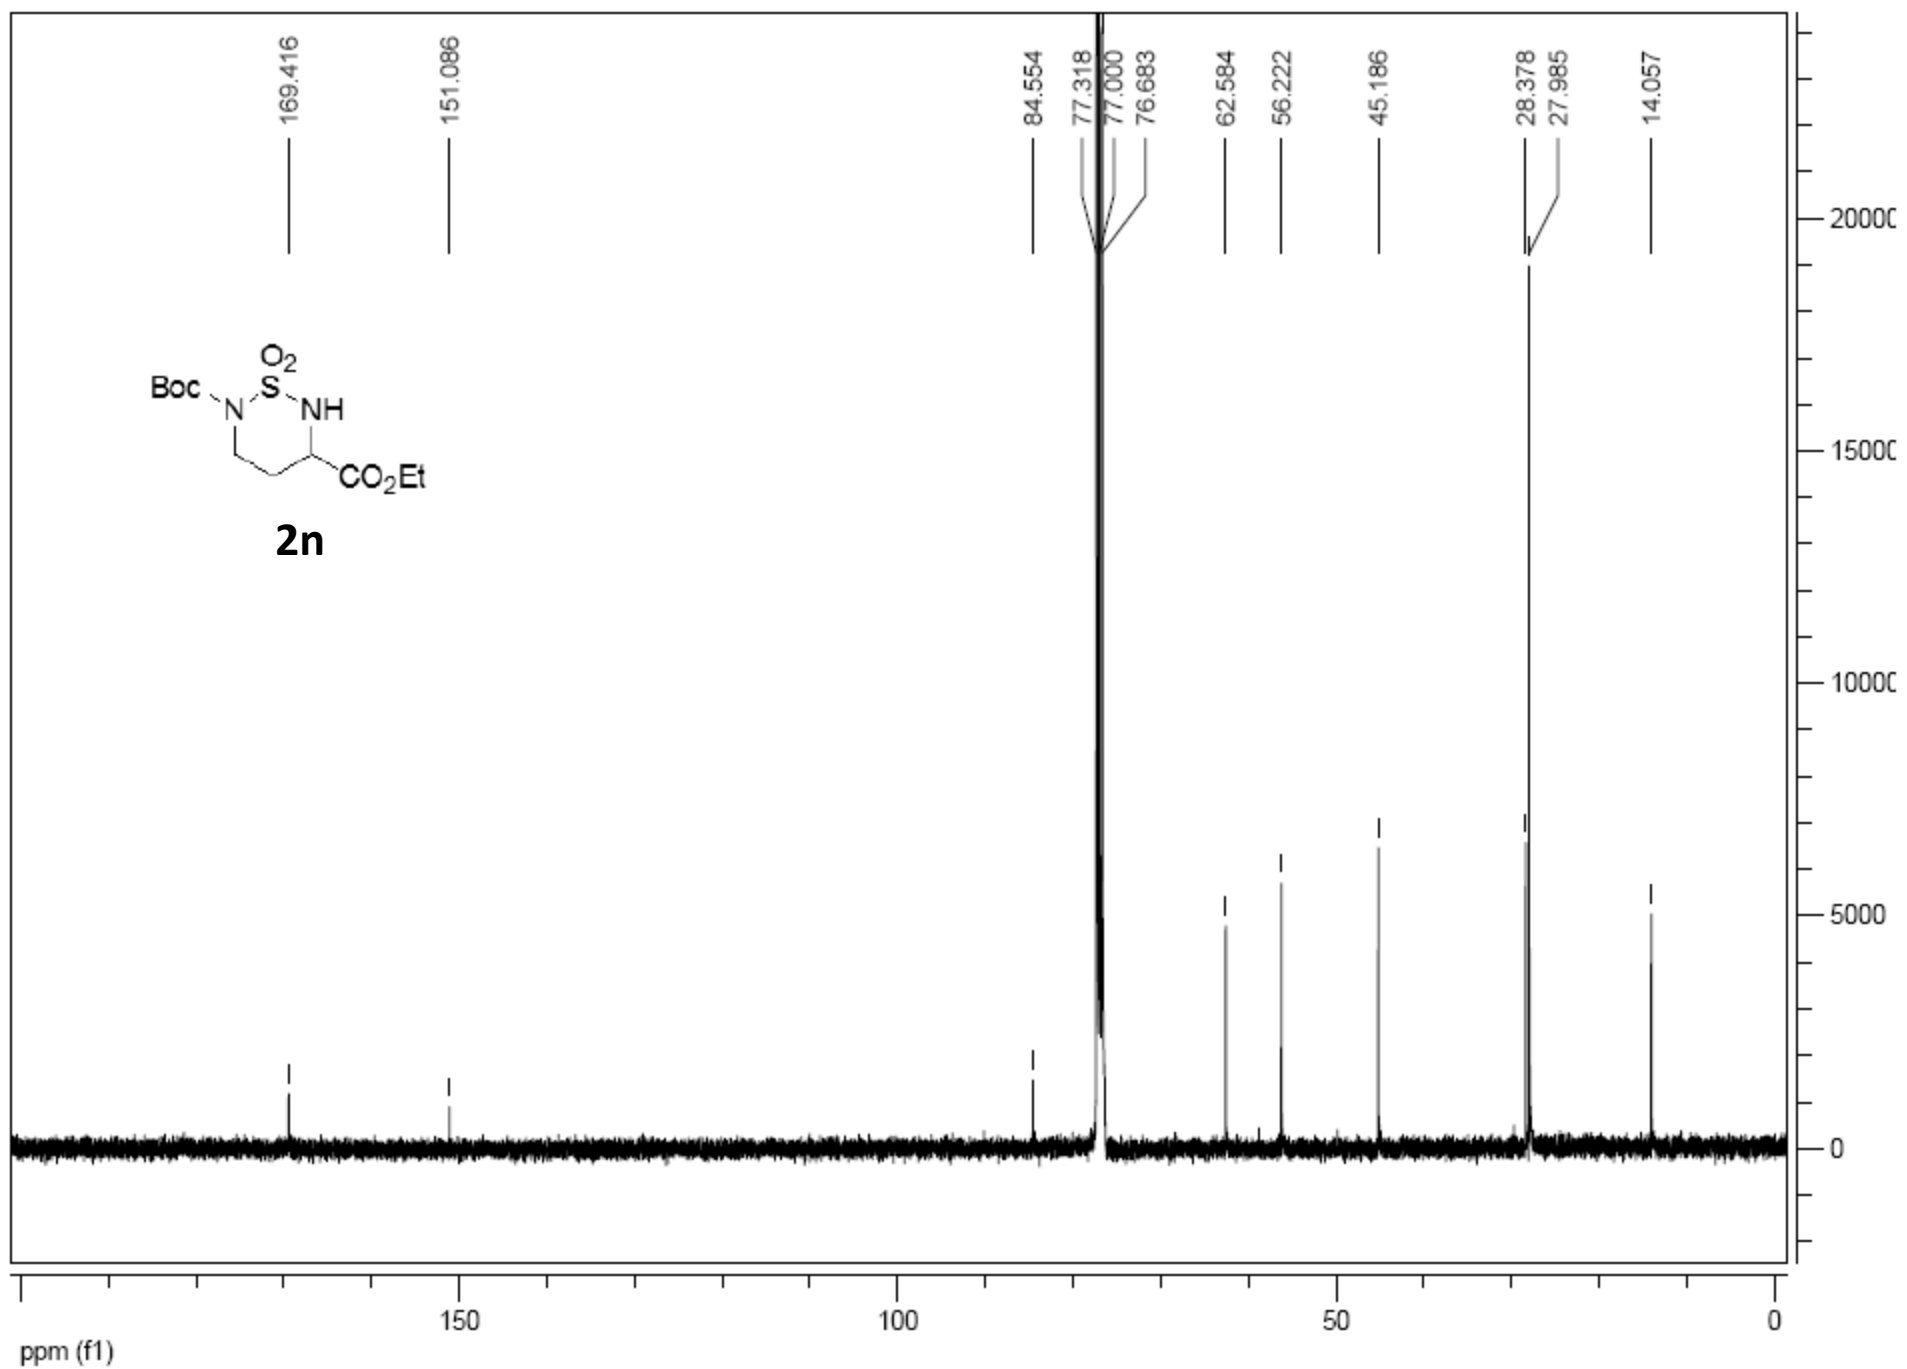

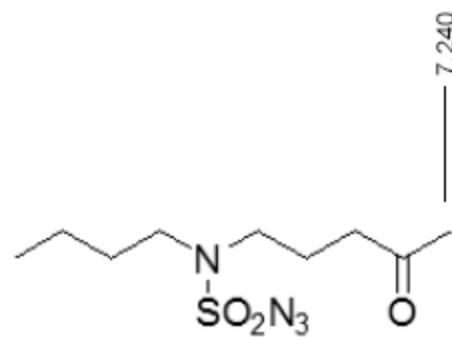

**1o**

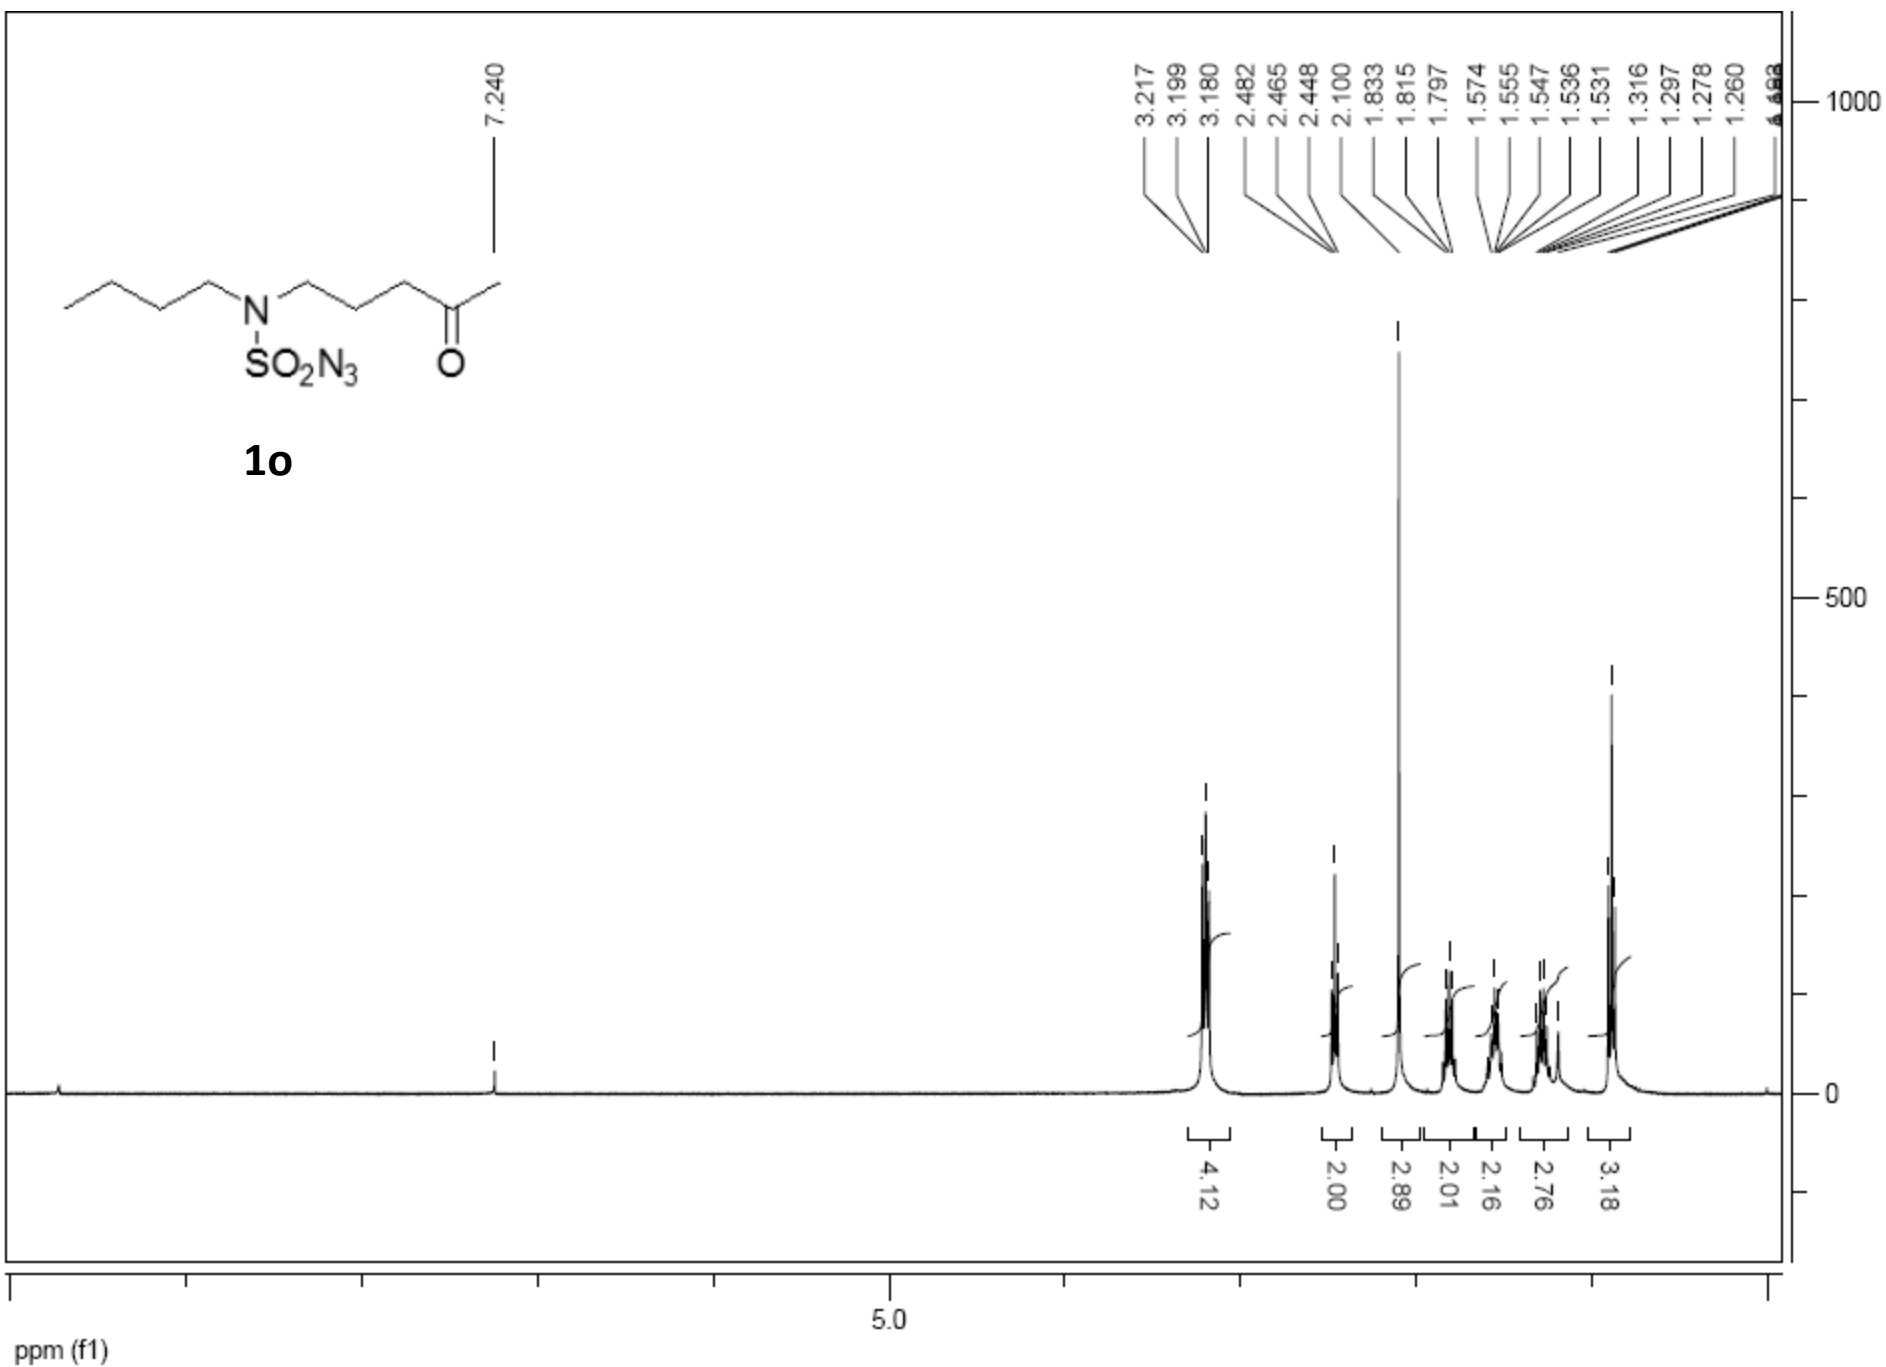

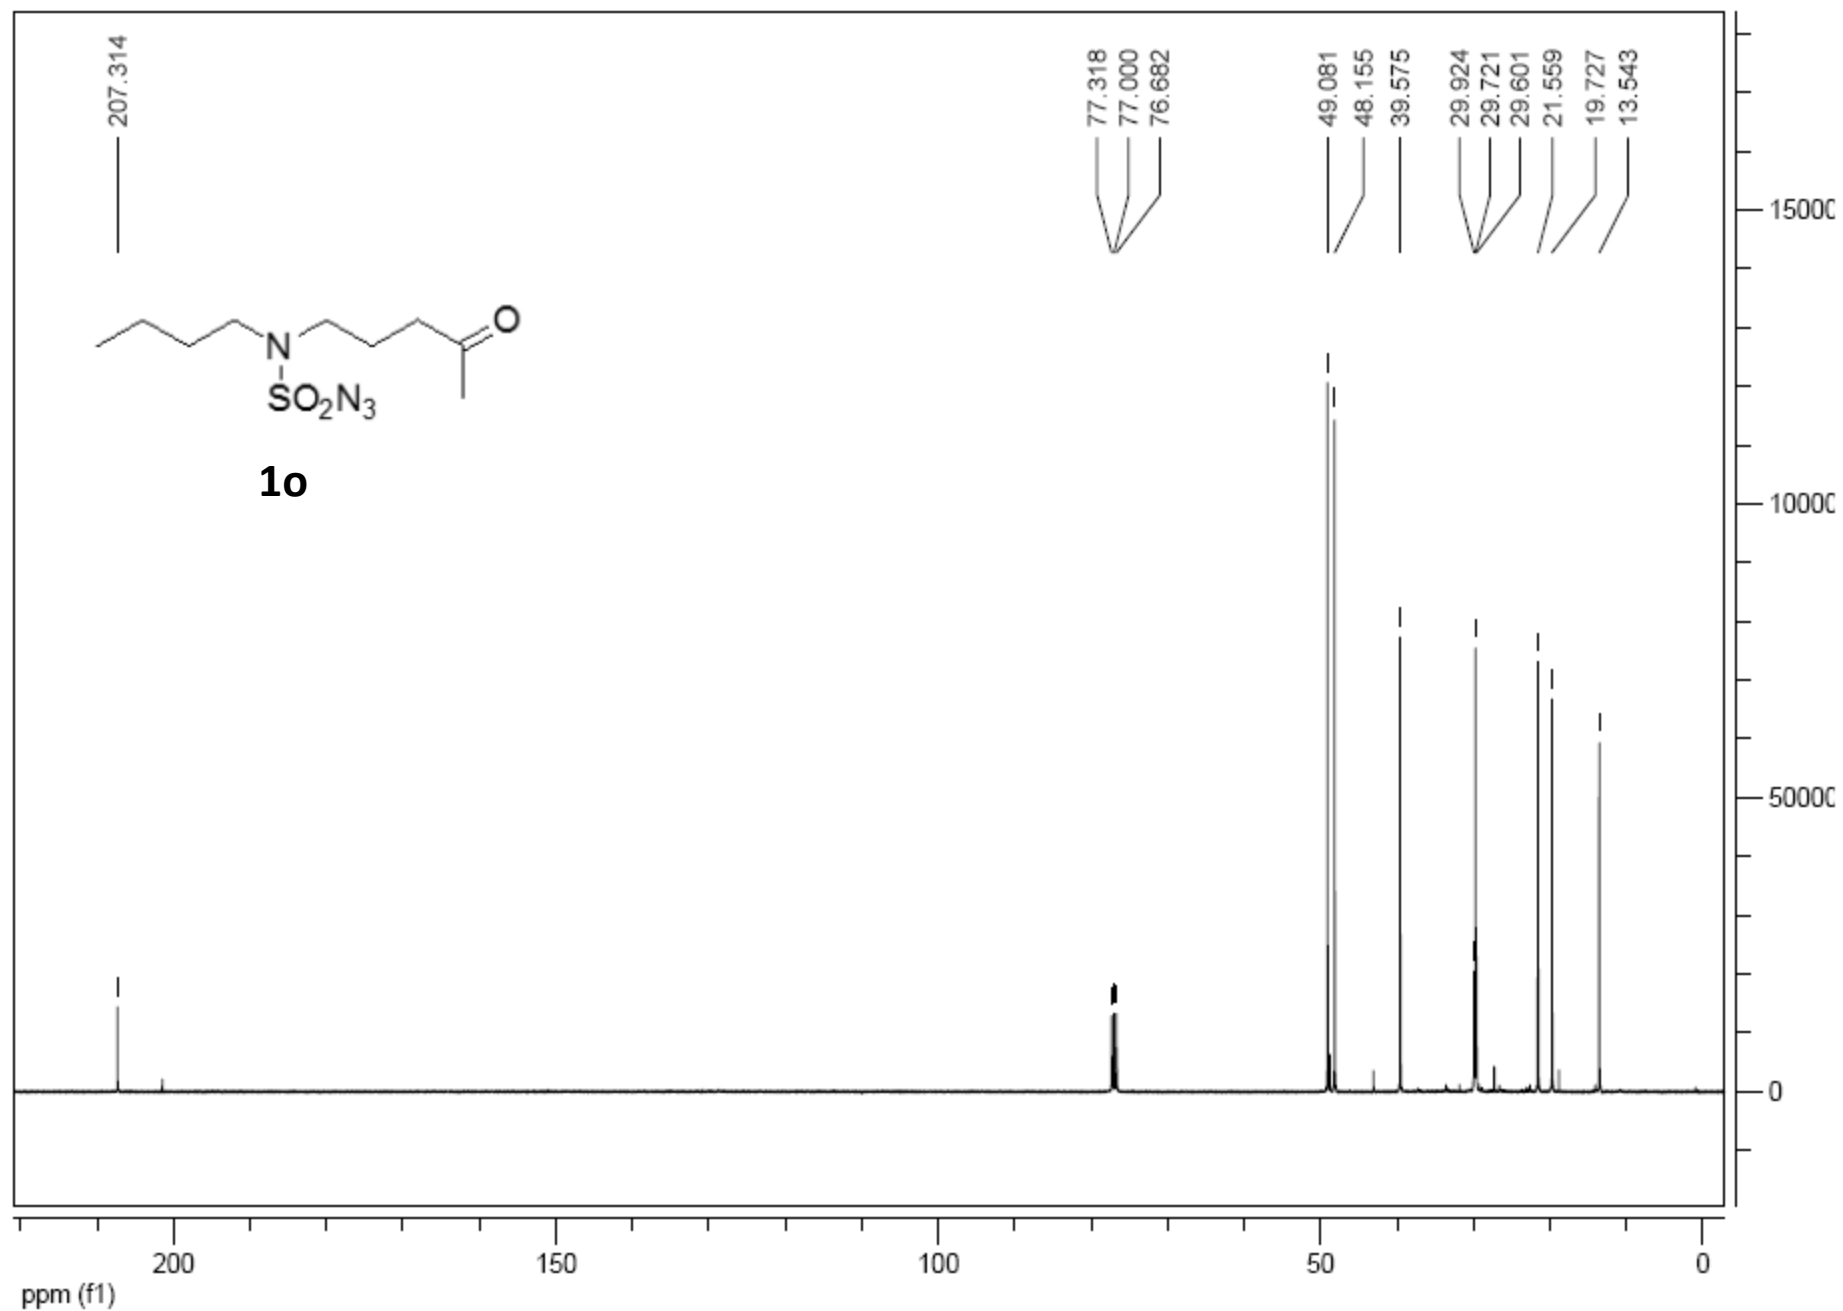



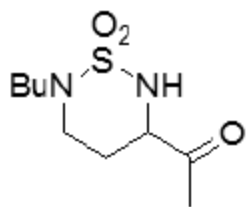

**2oA**

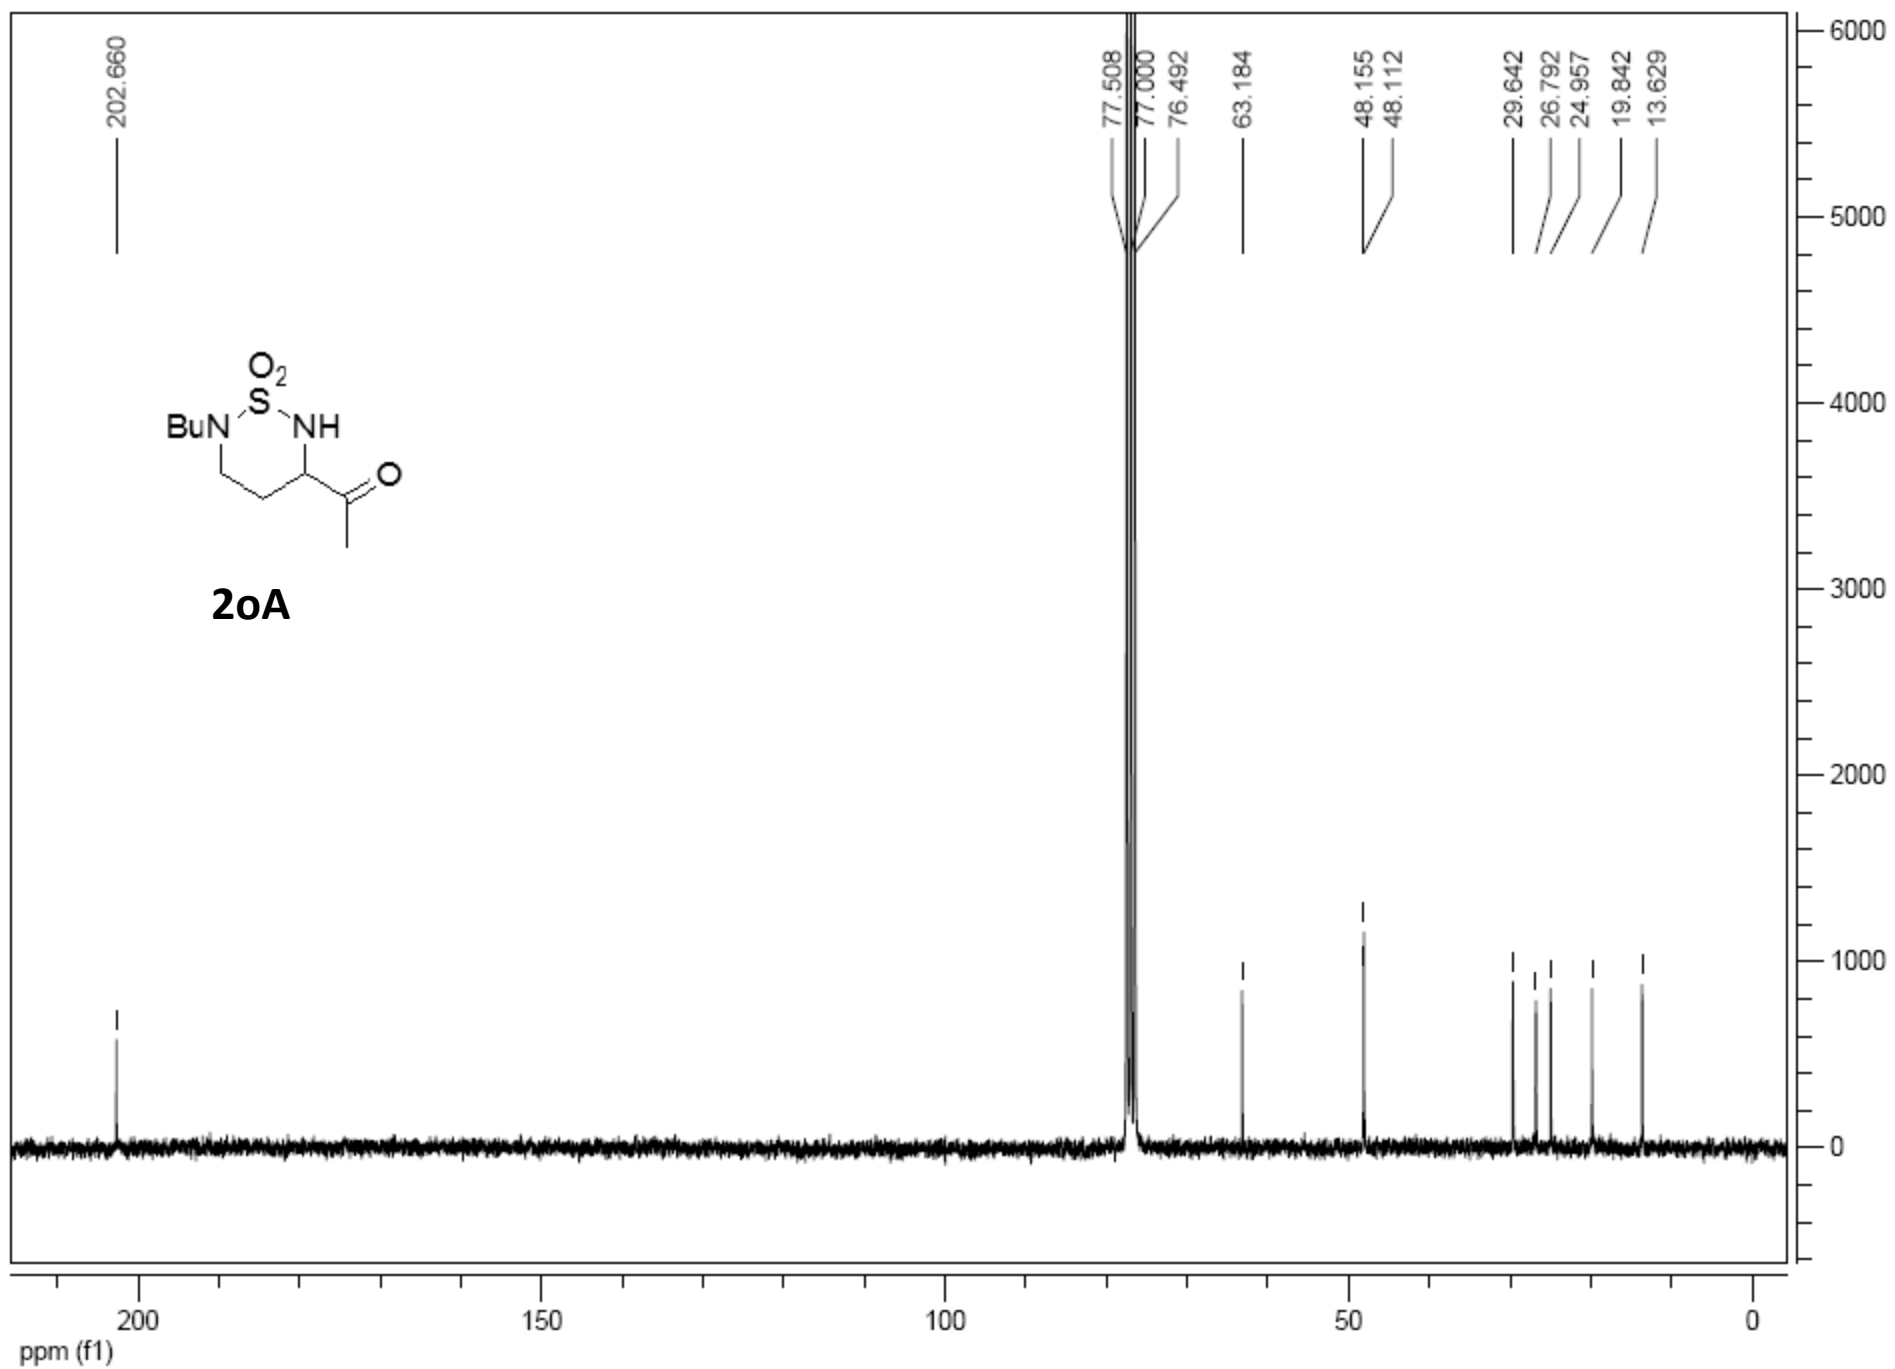

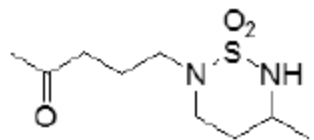

**2oB**

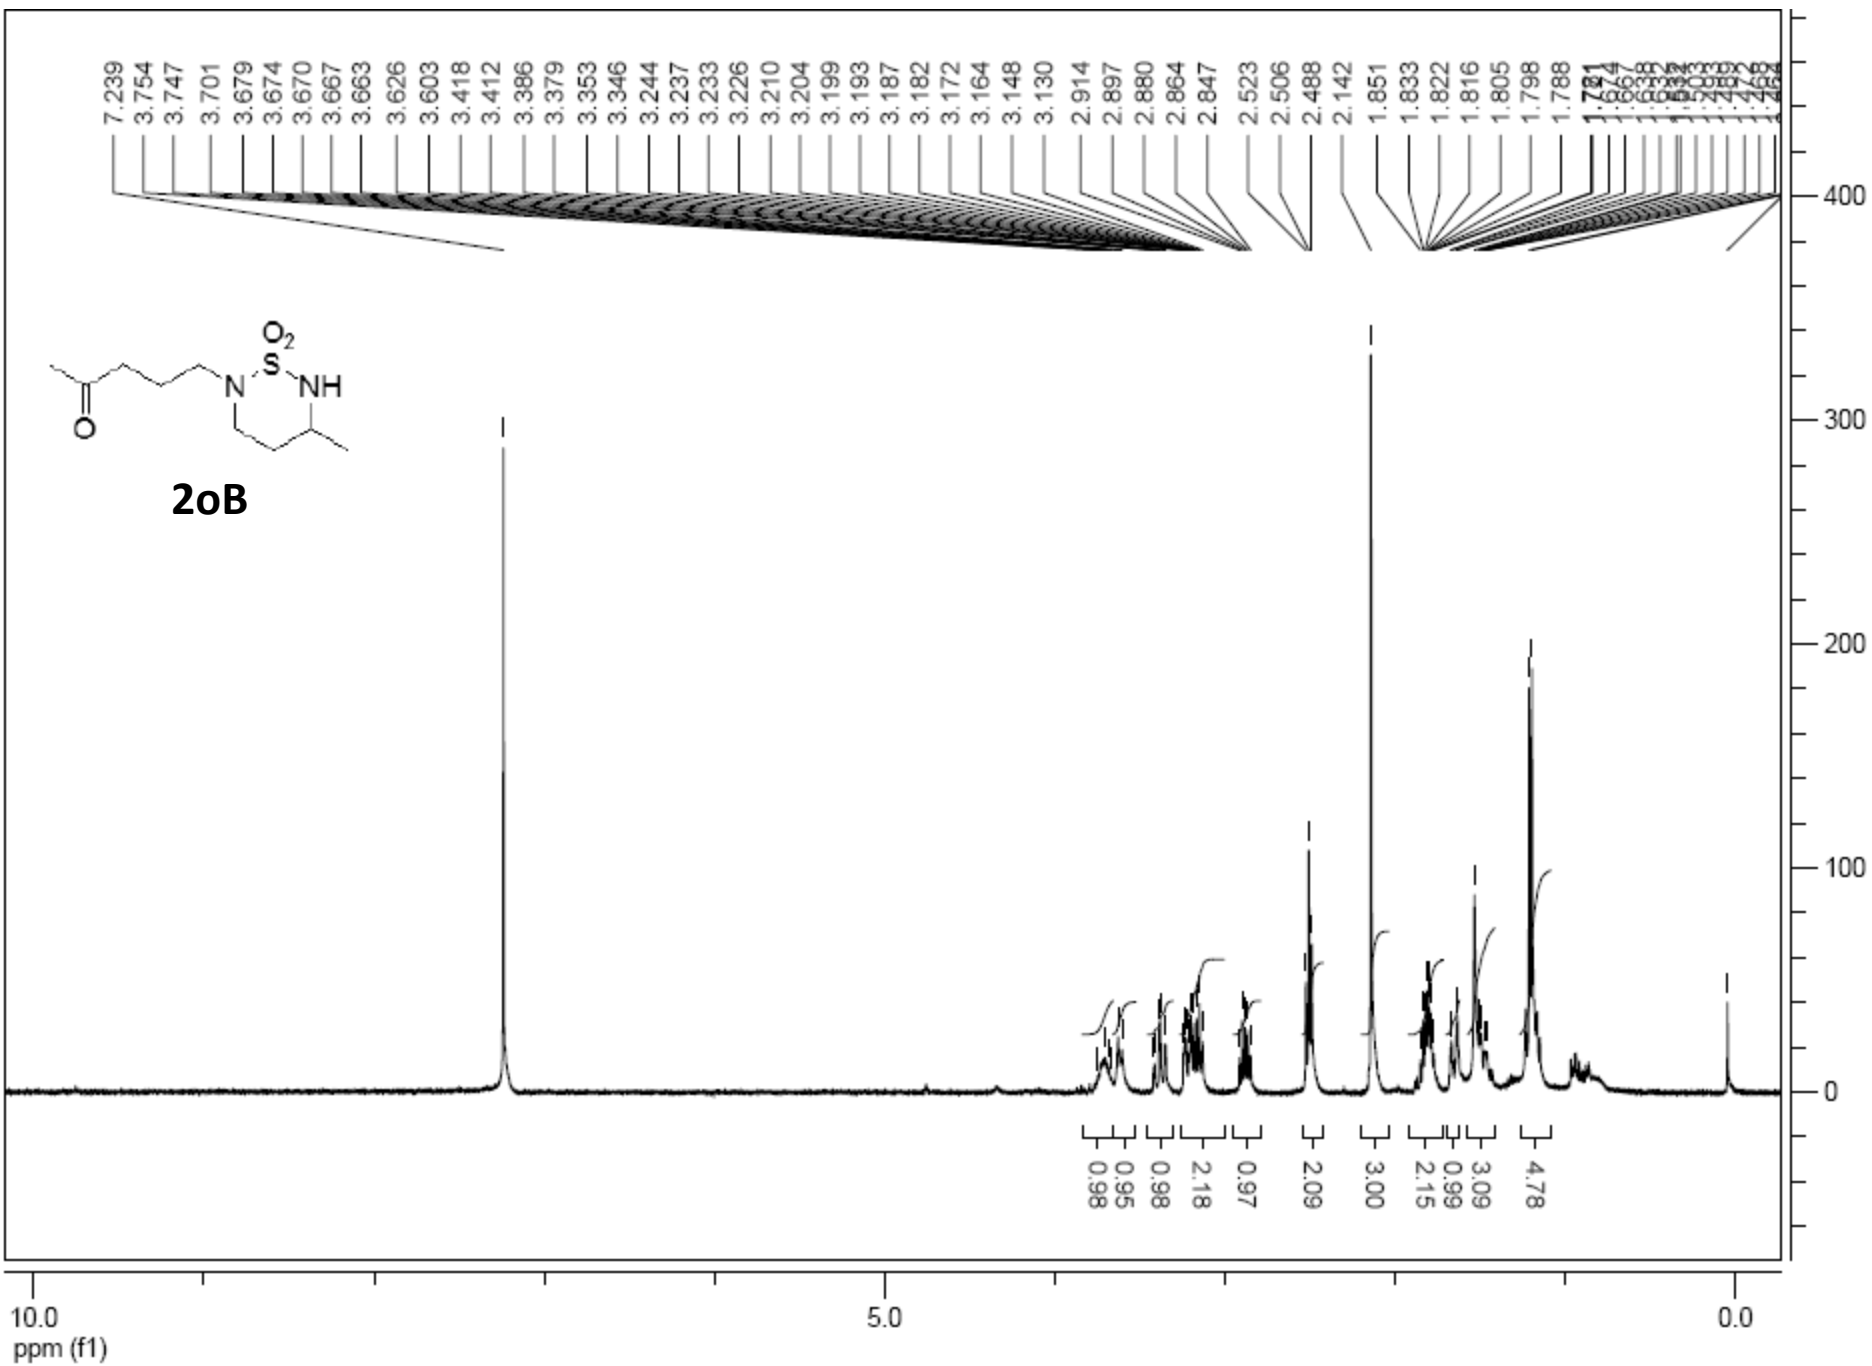

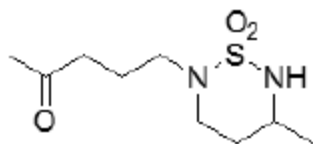

**2oB**

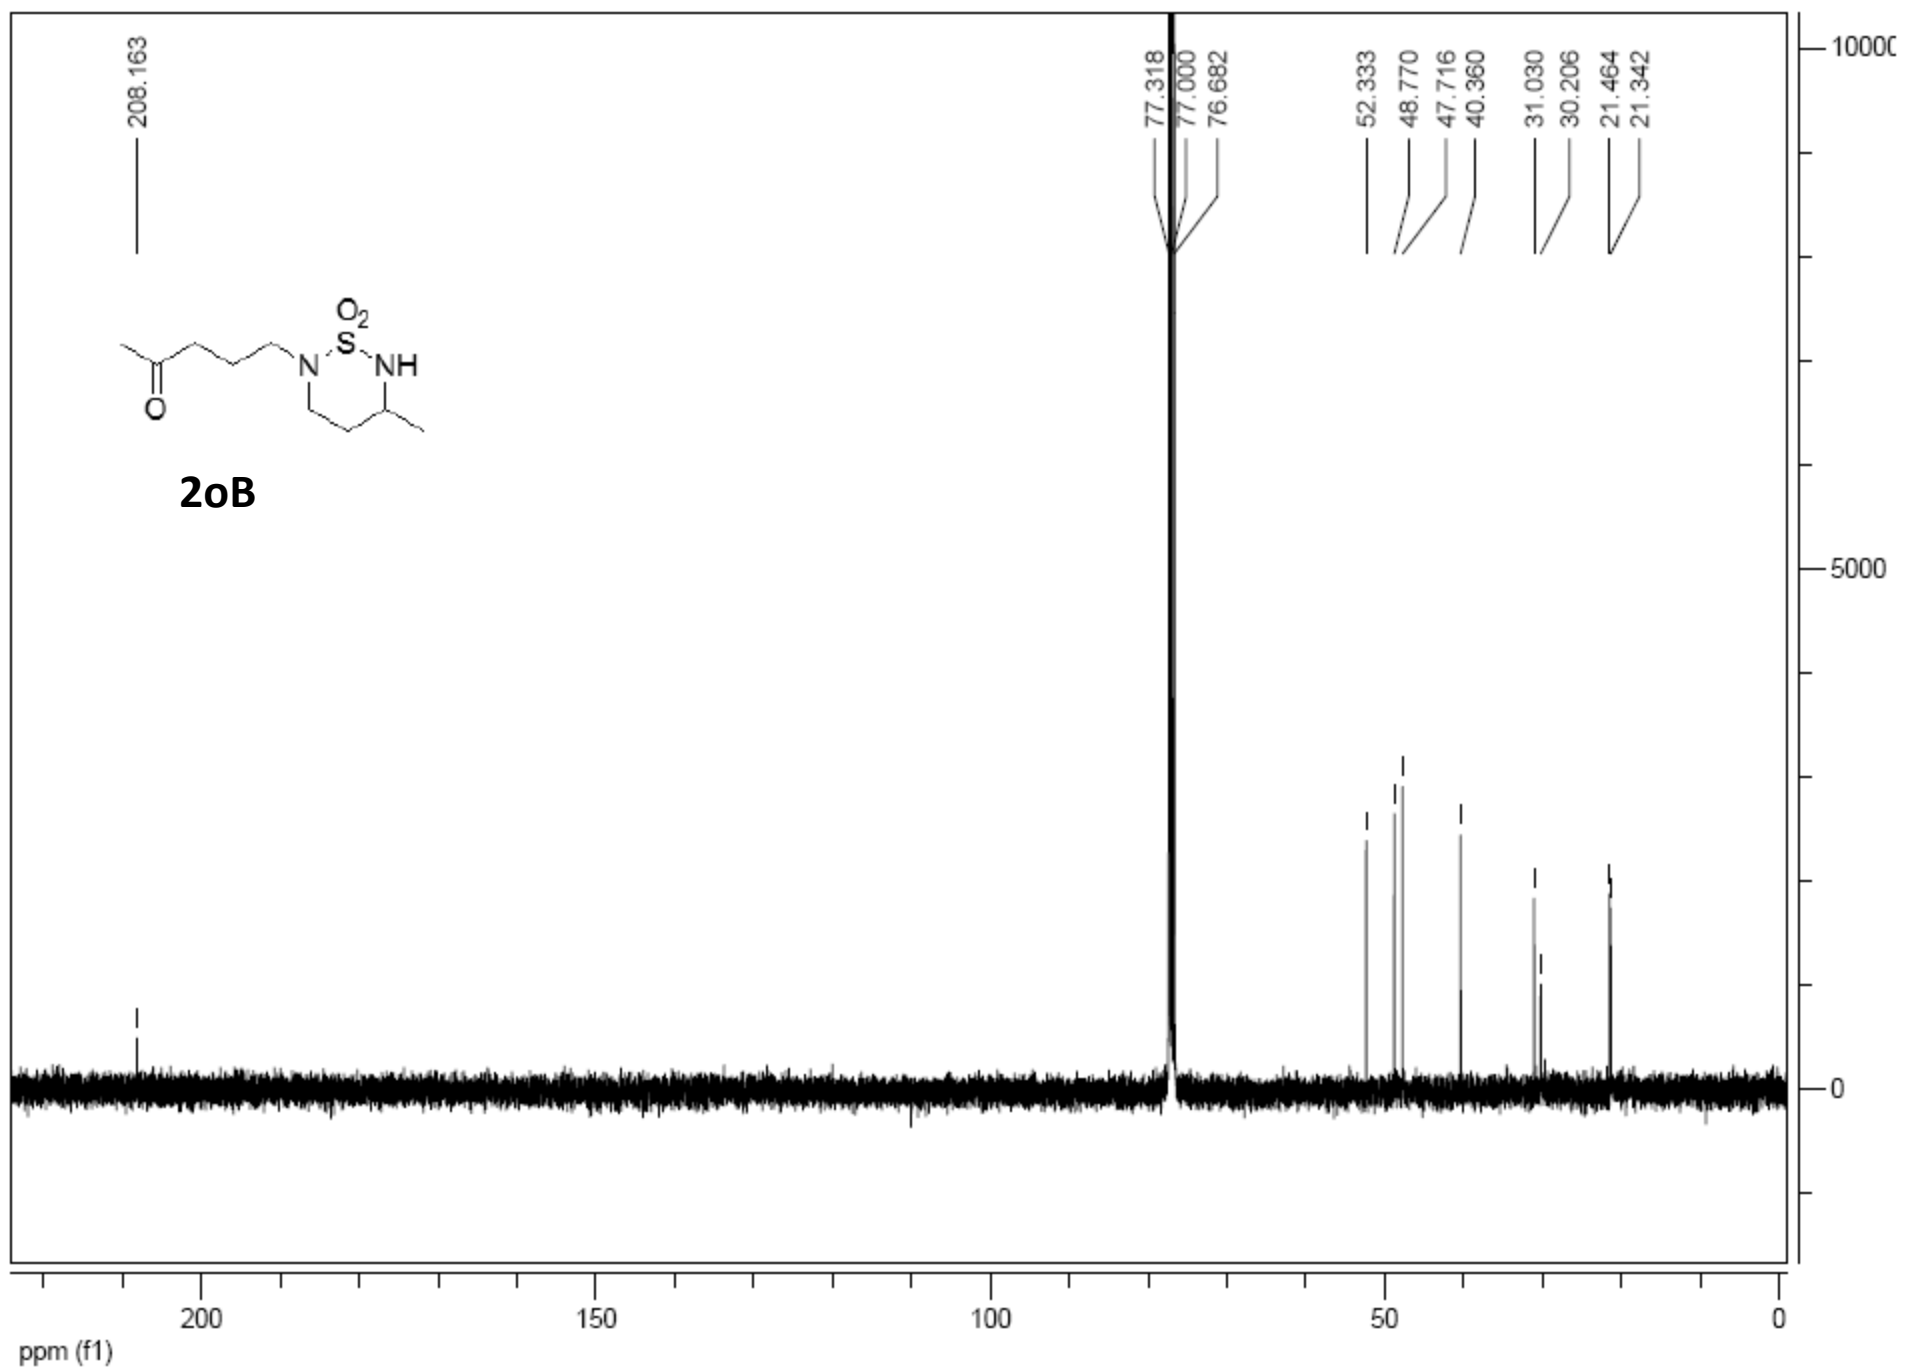



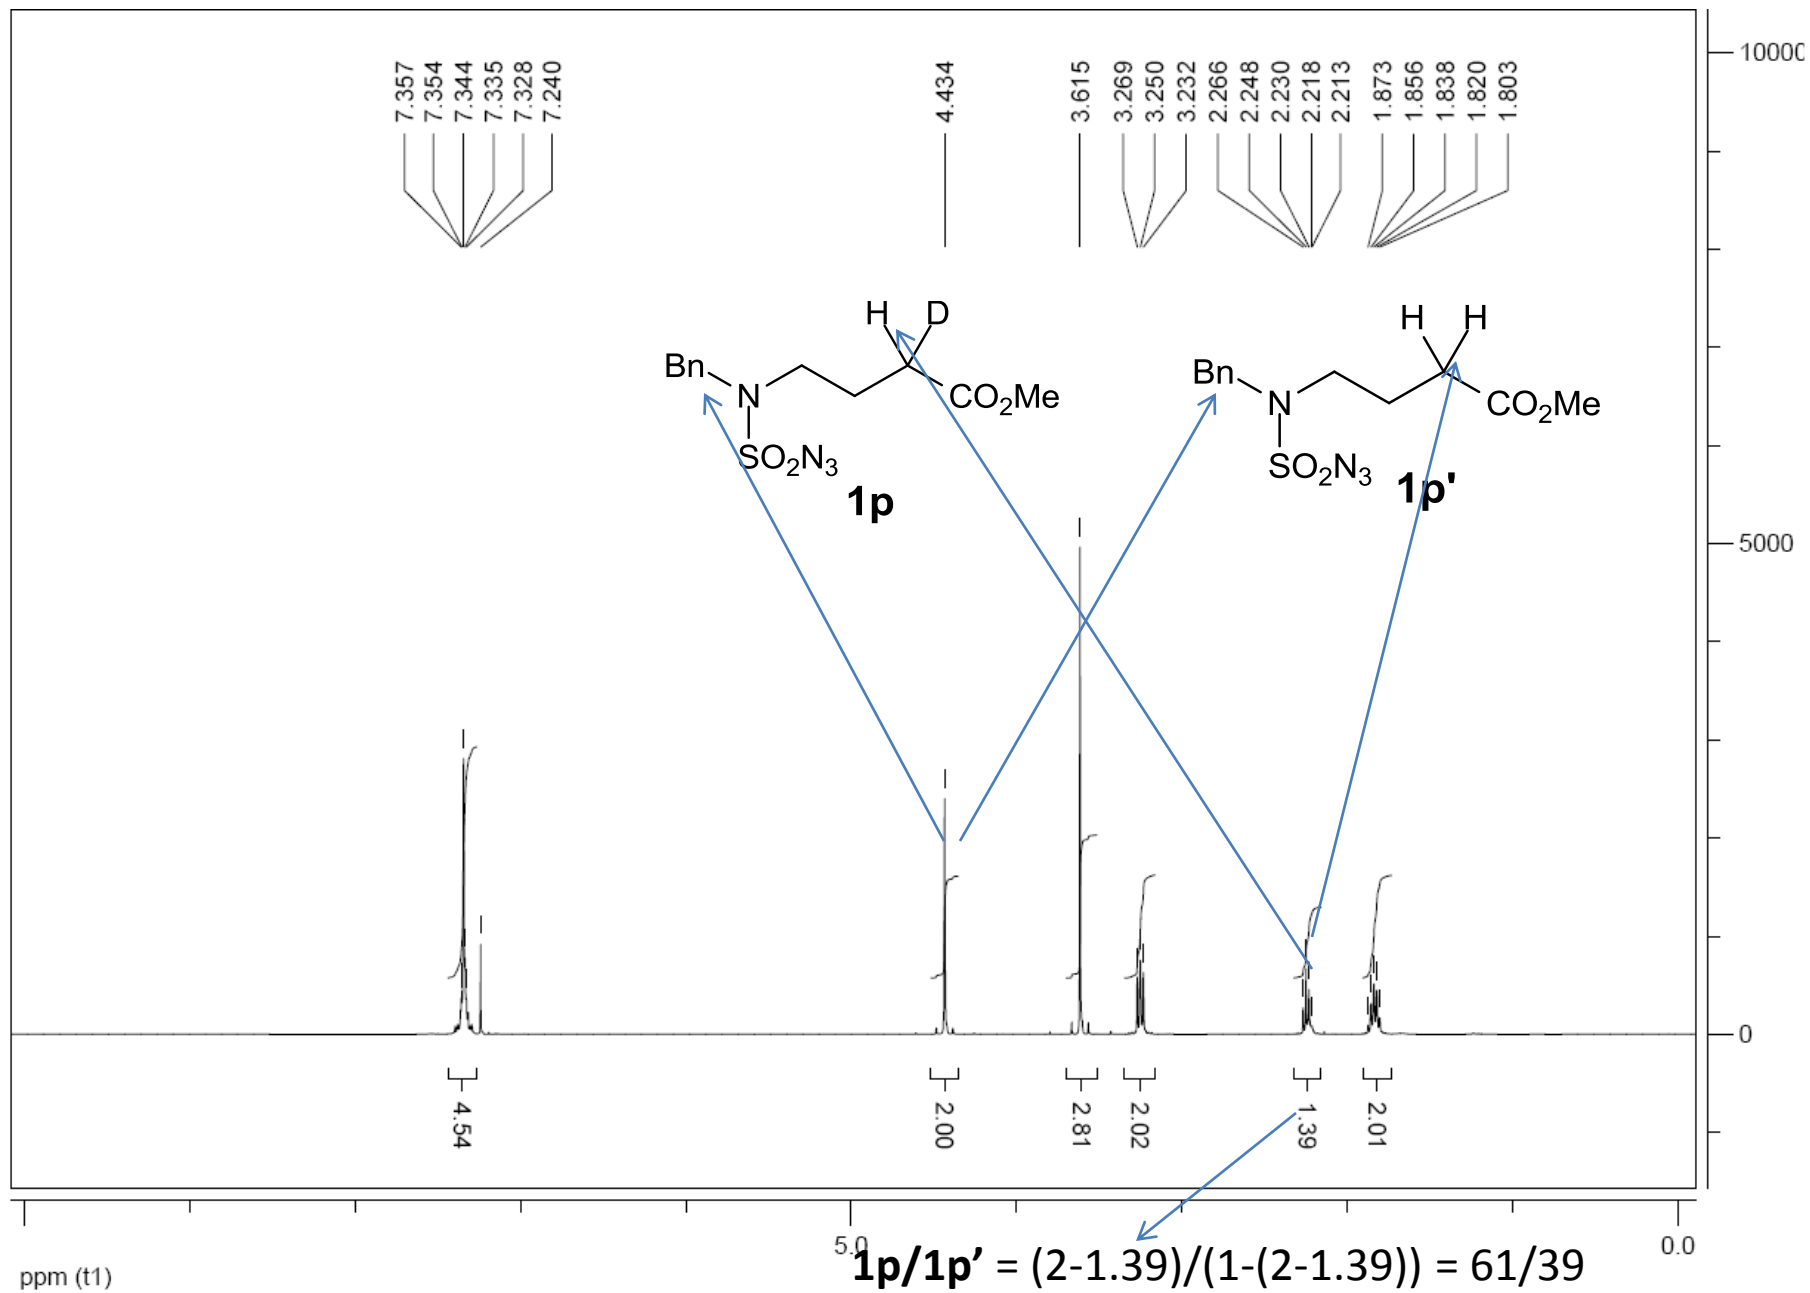

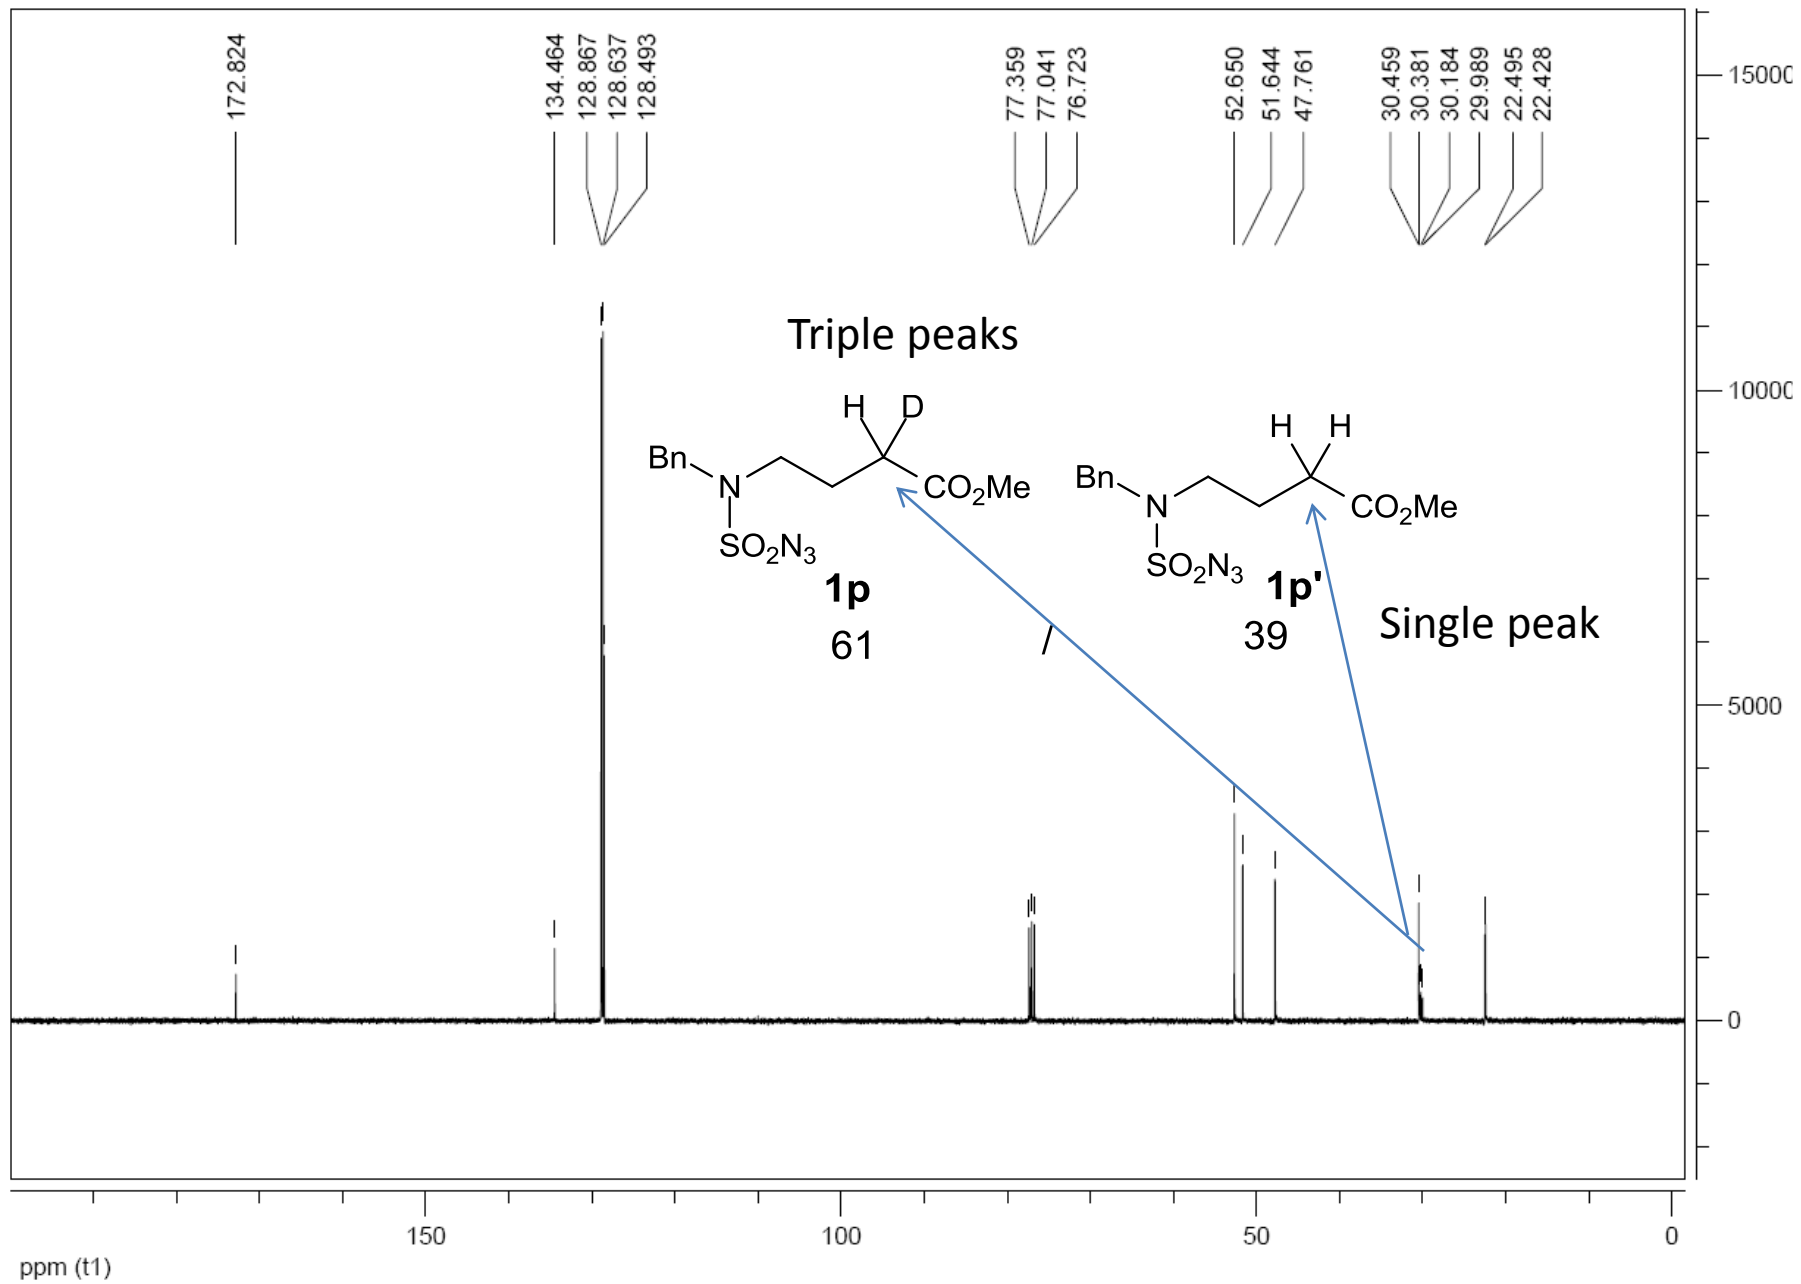

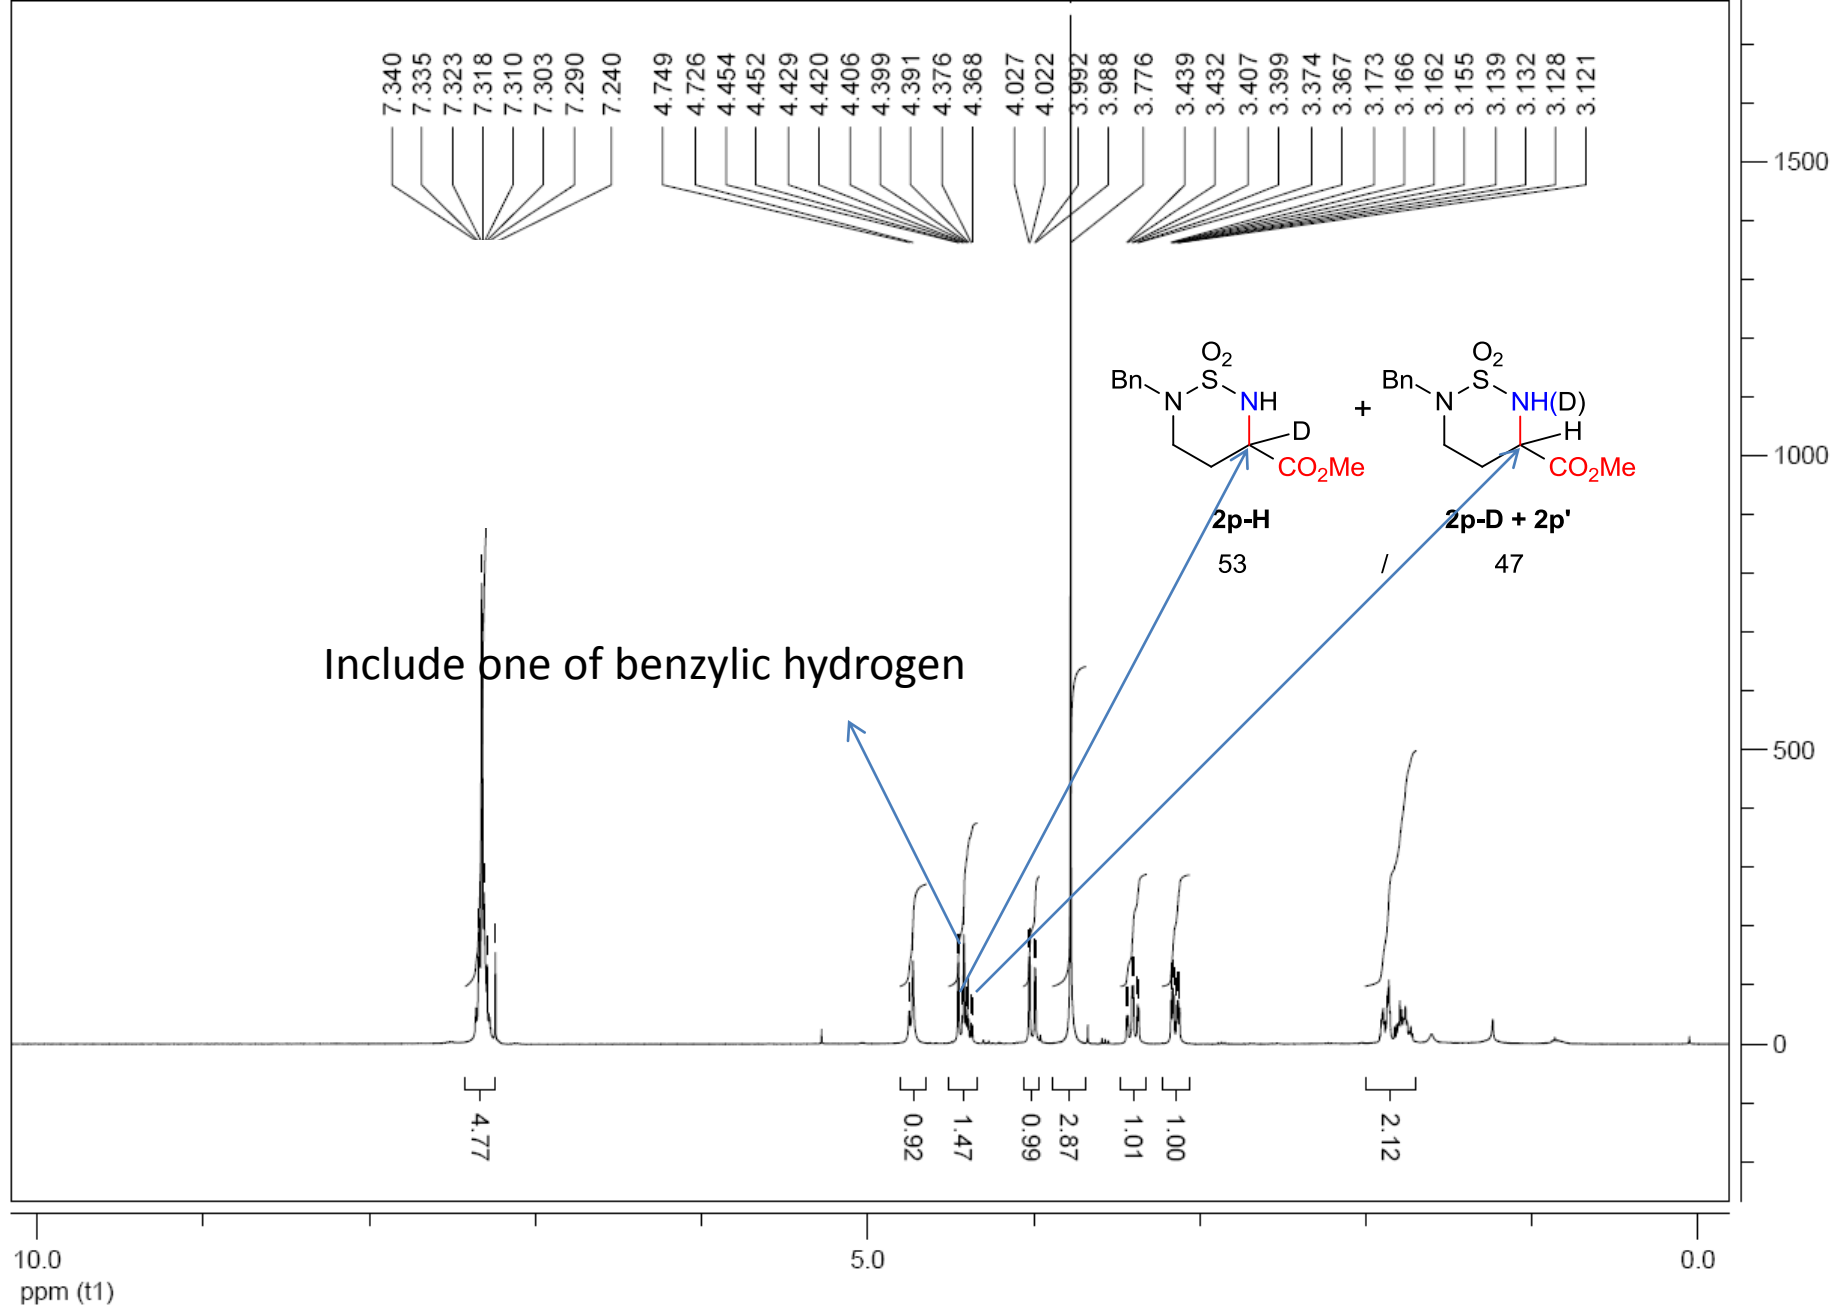

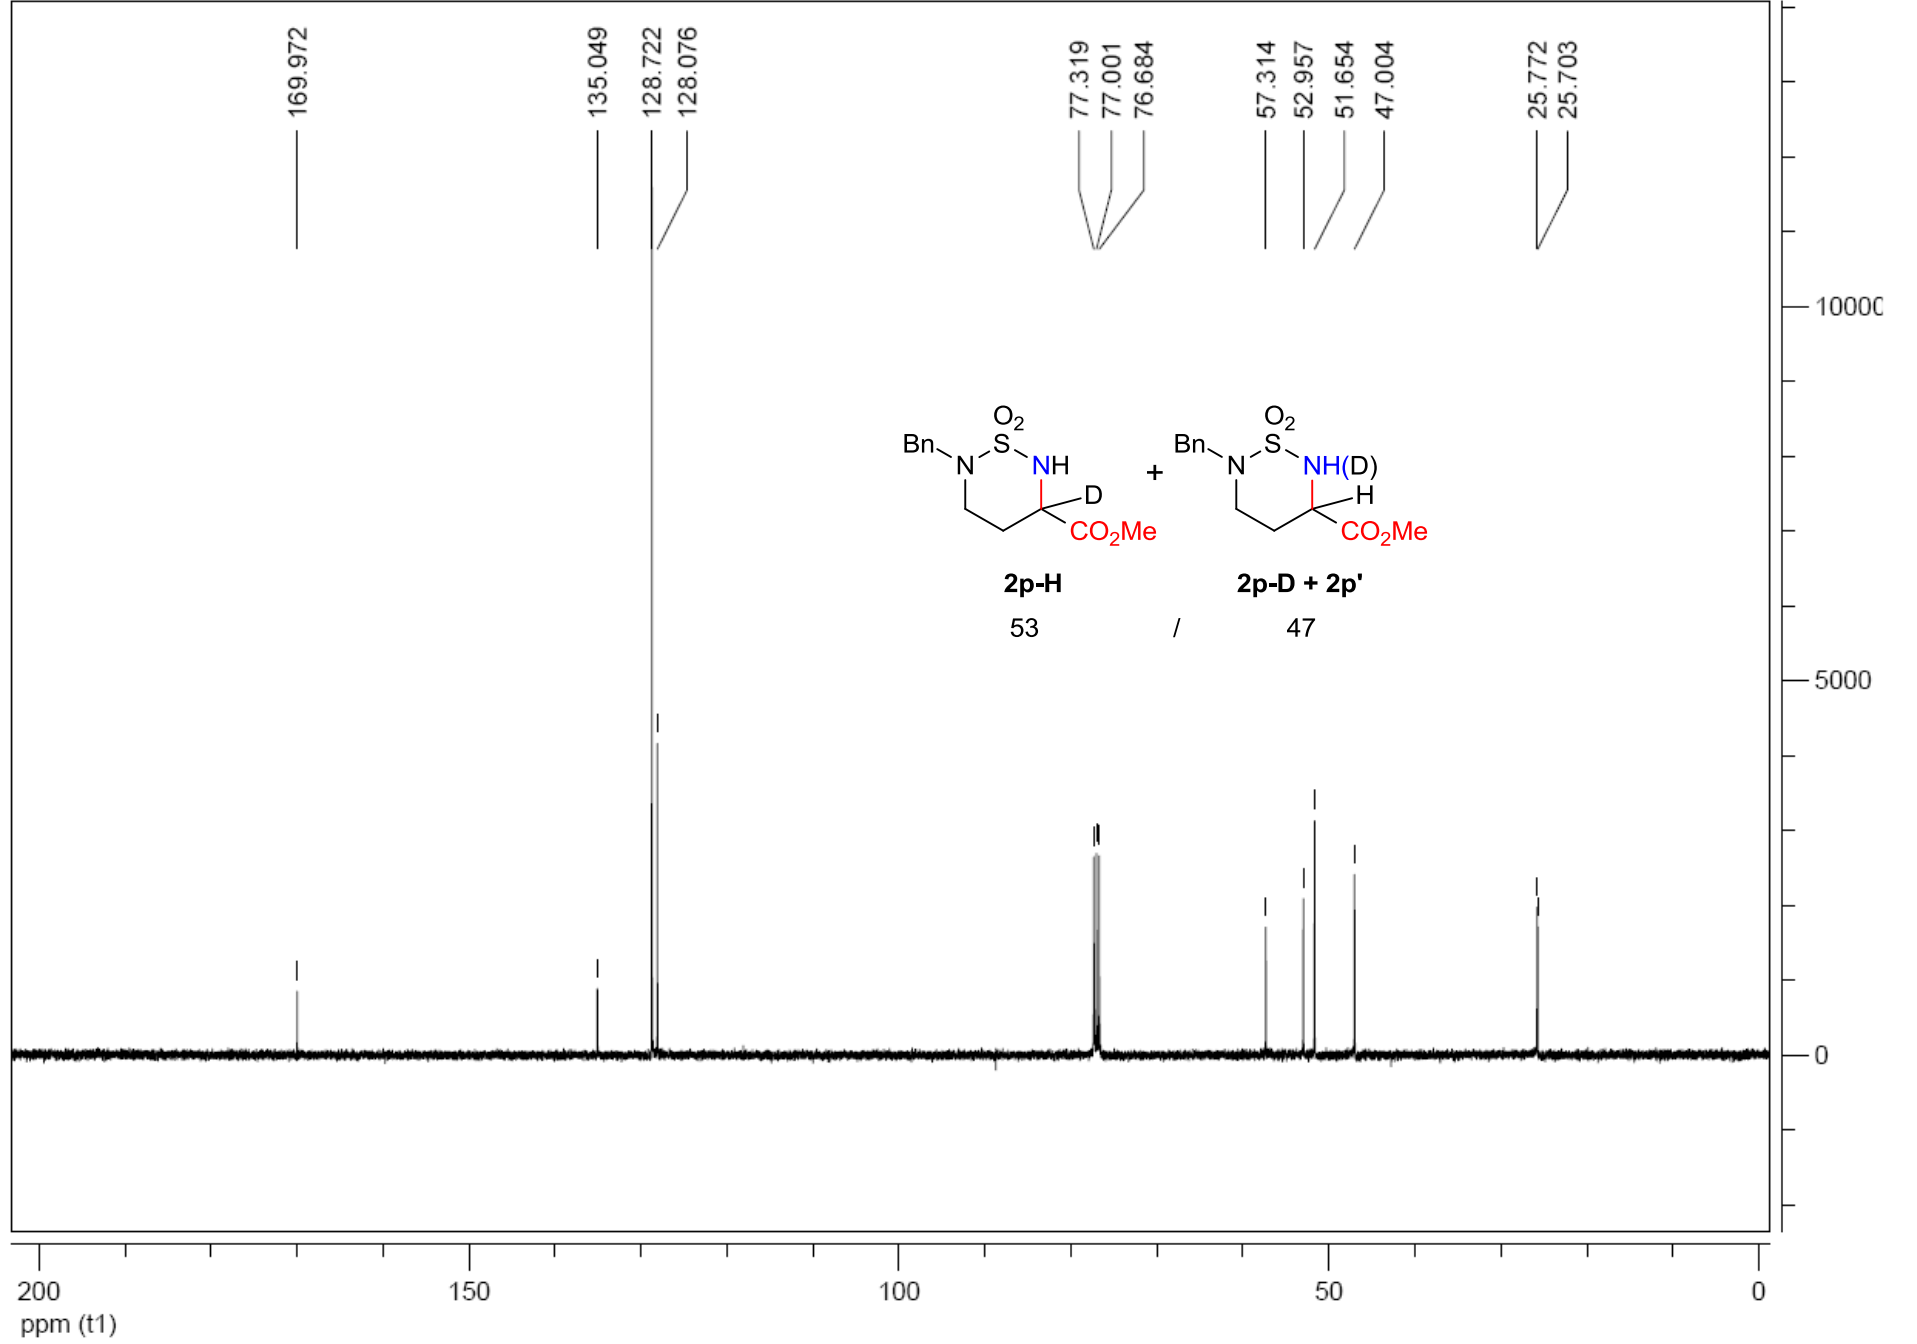



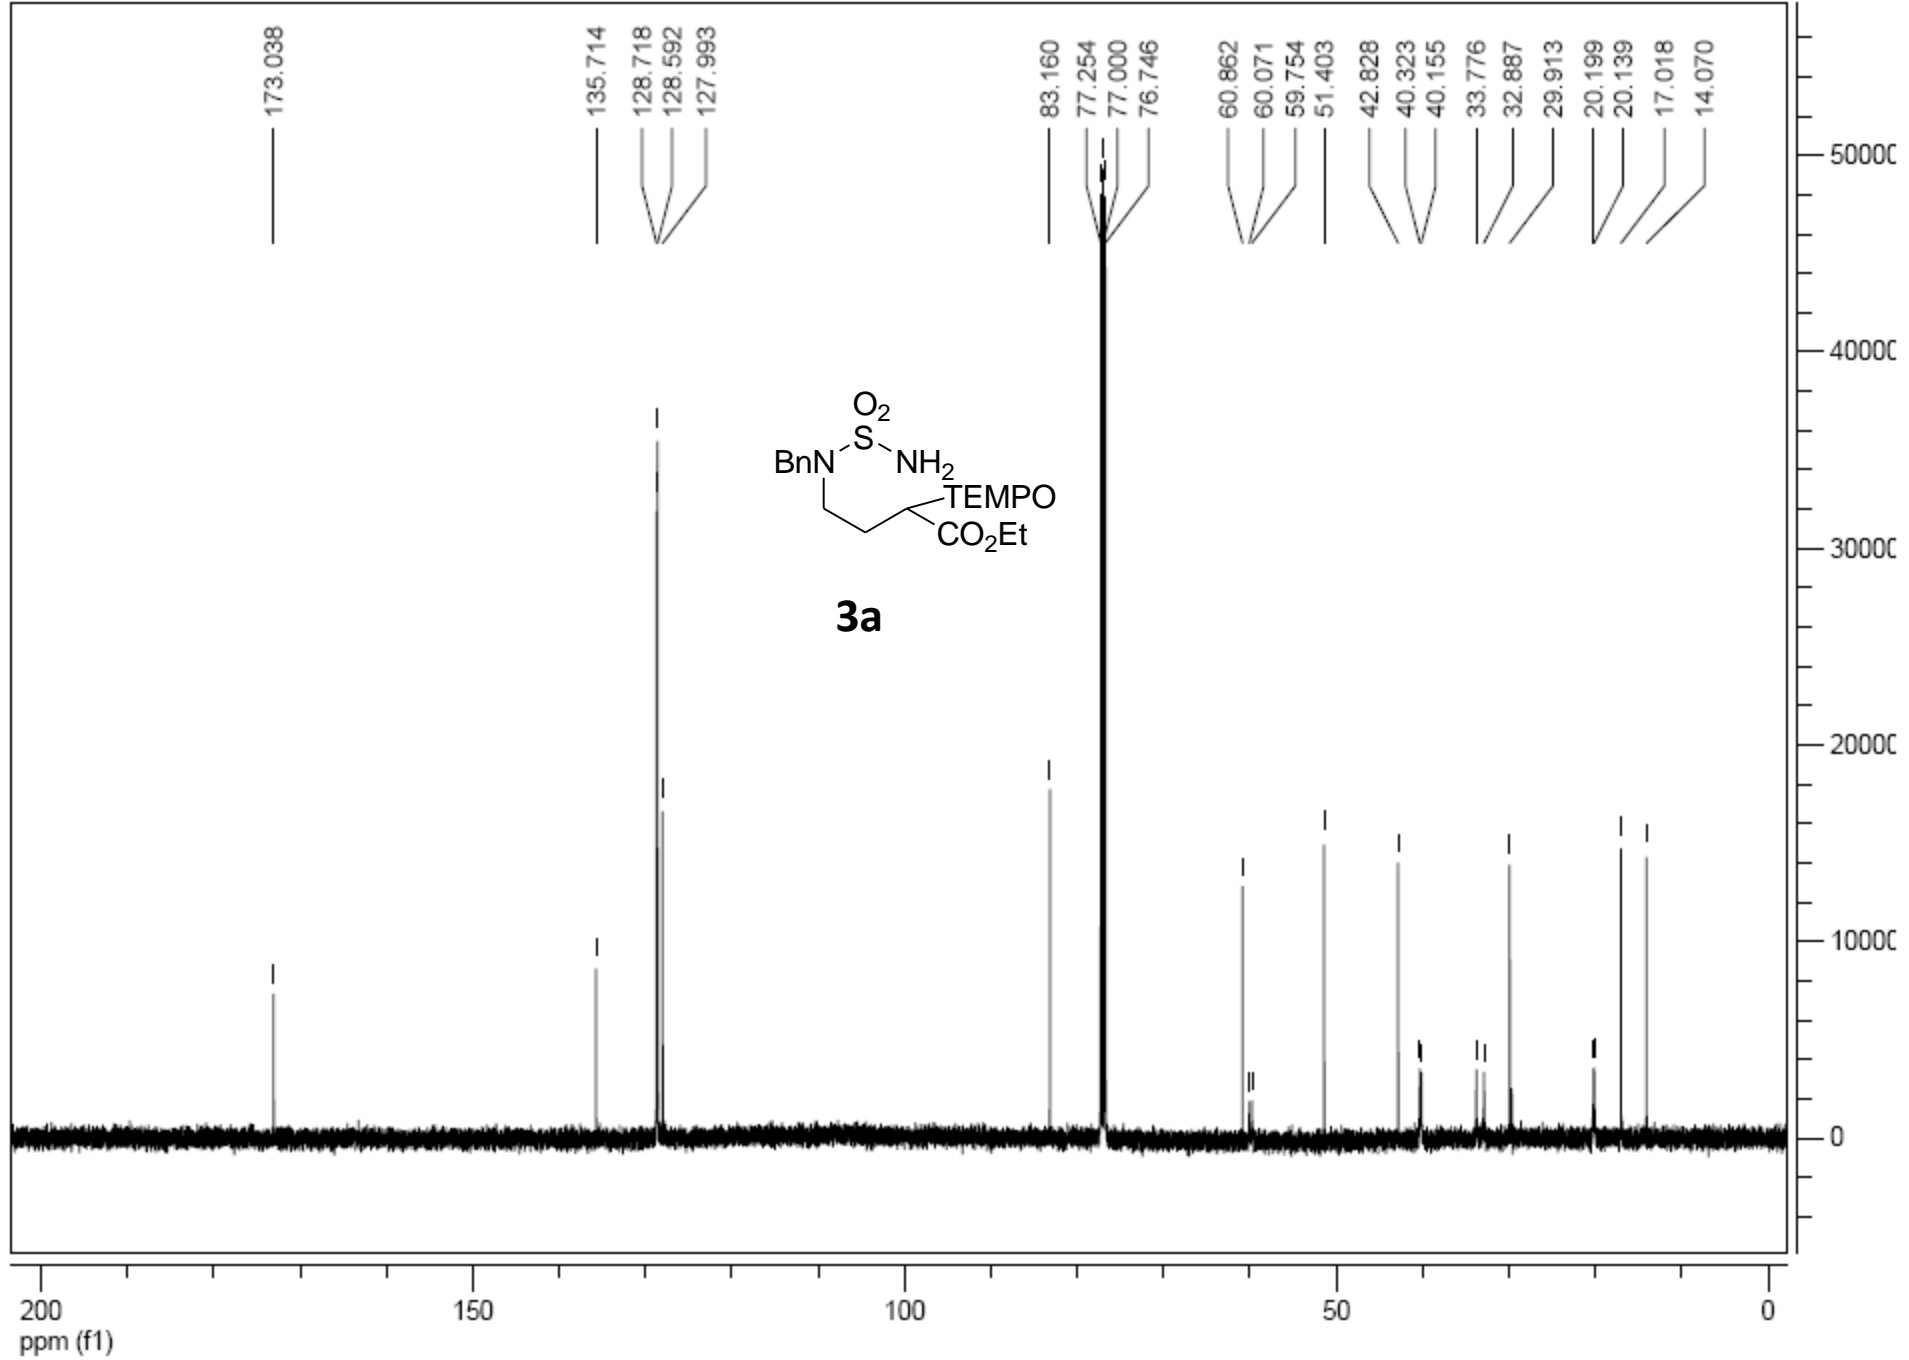

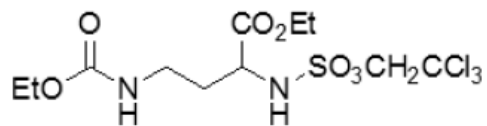

**4m**

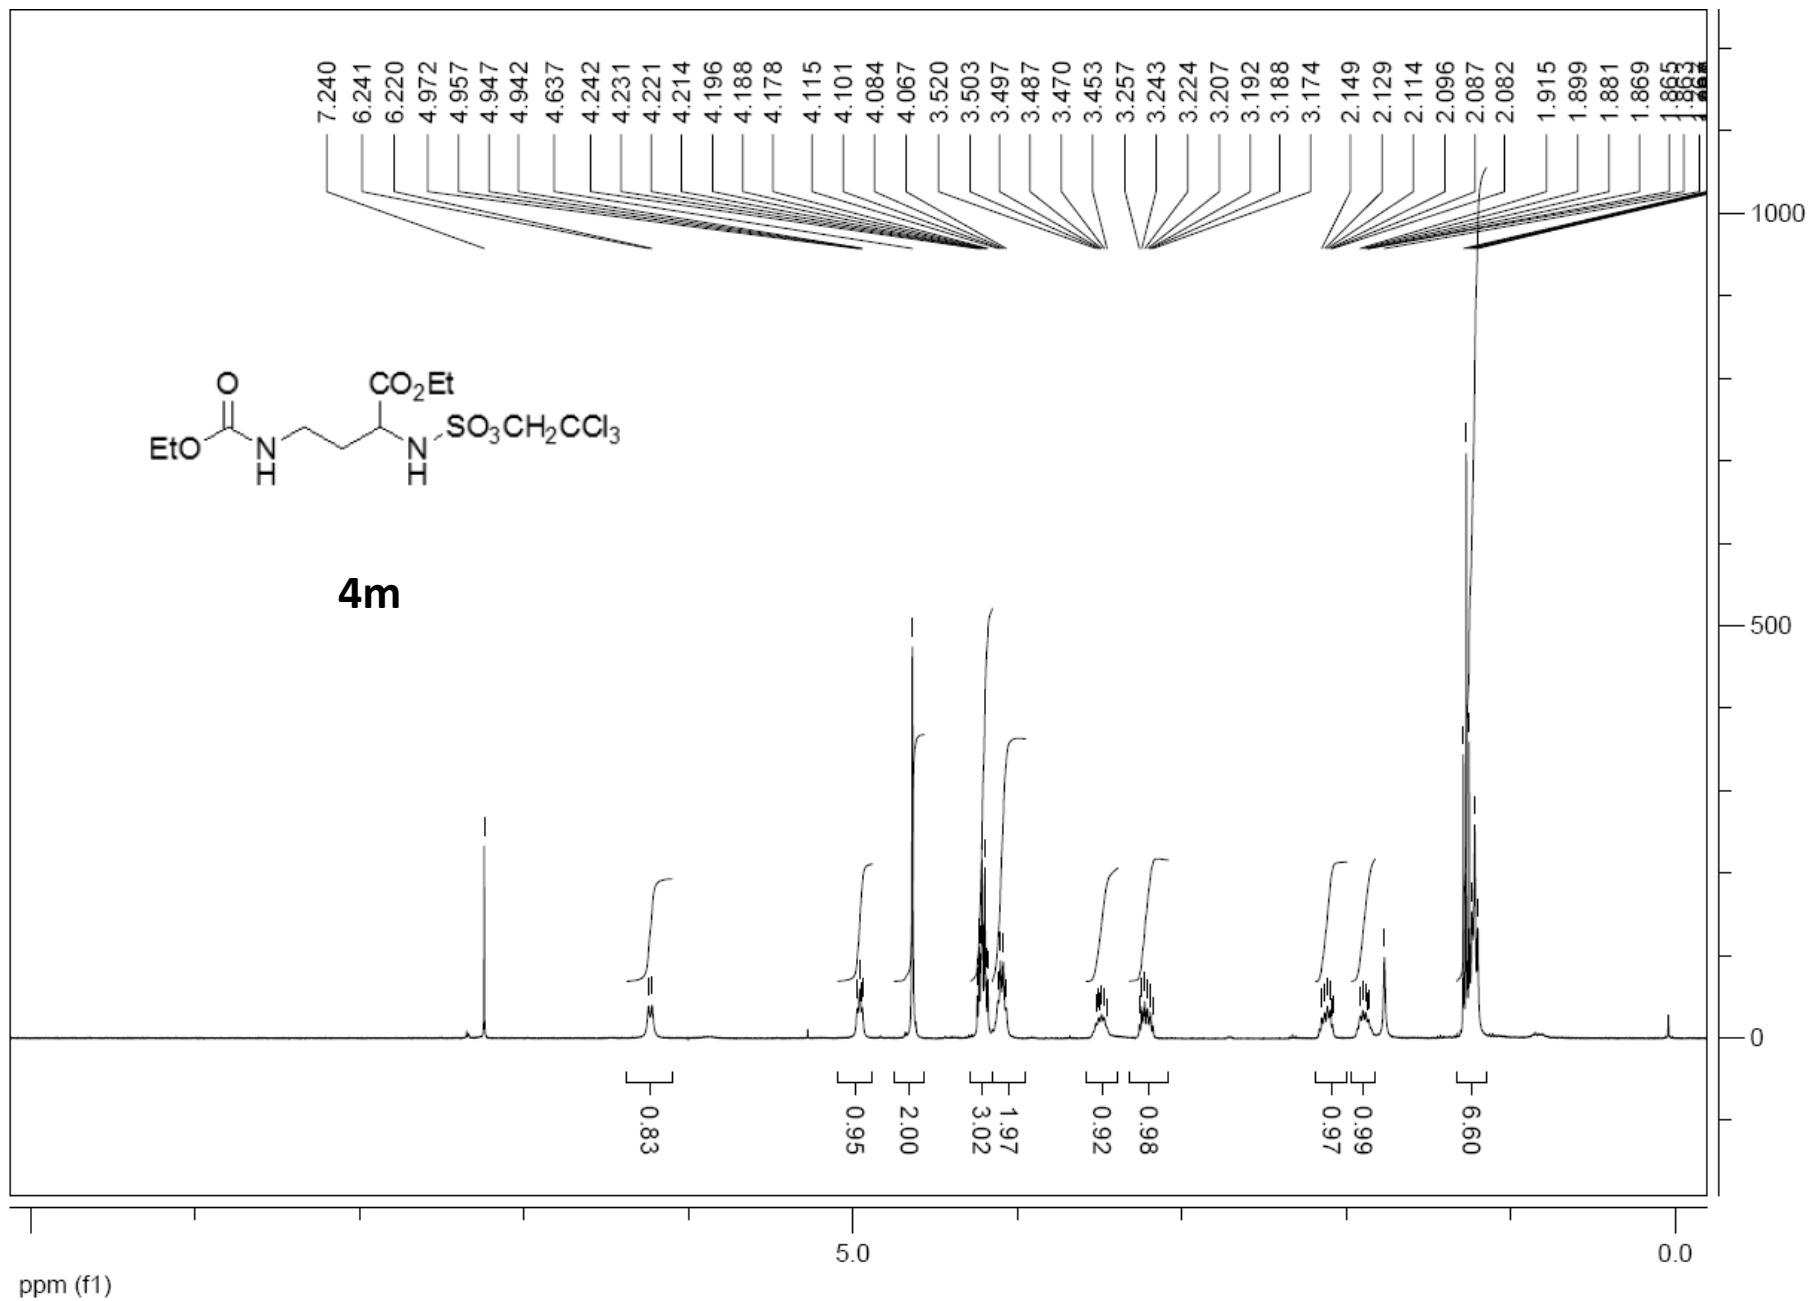

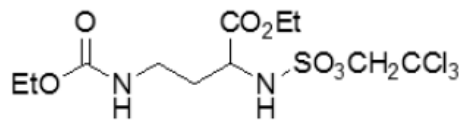

**4m**

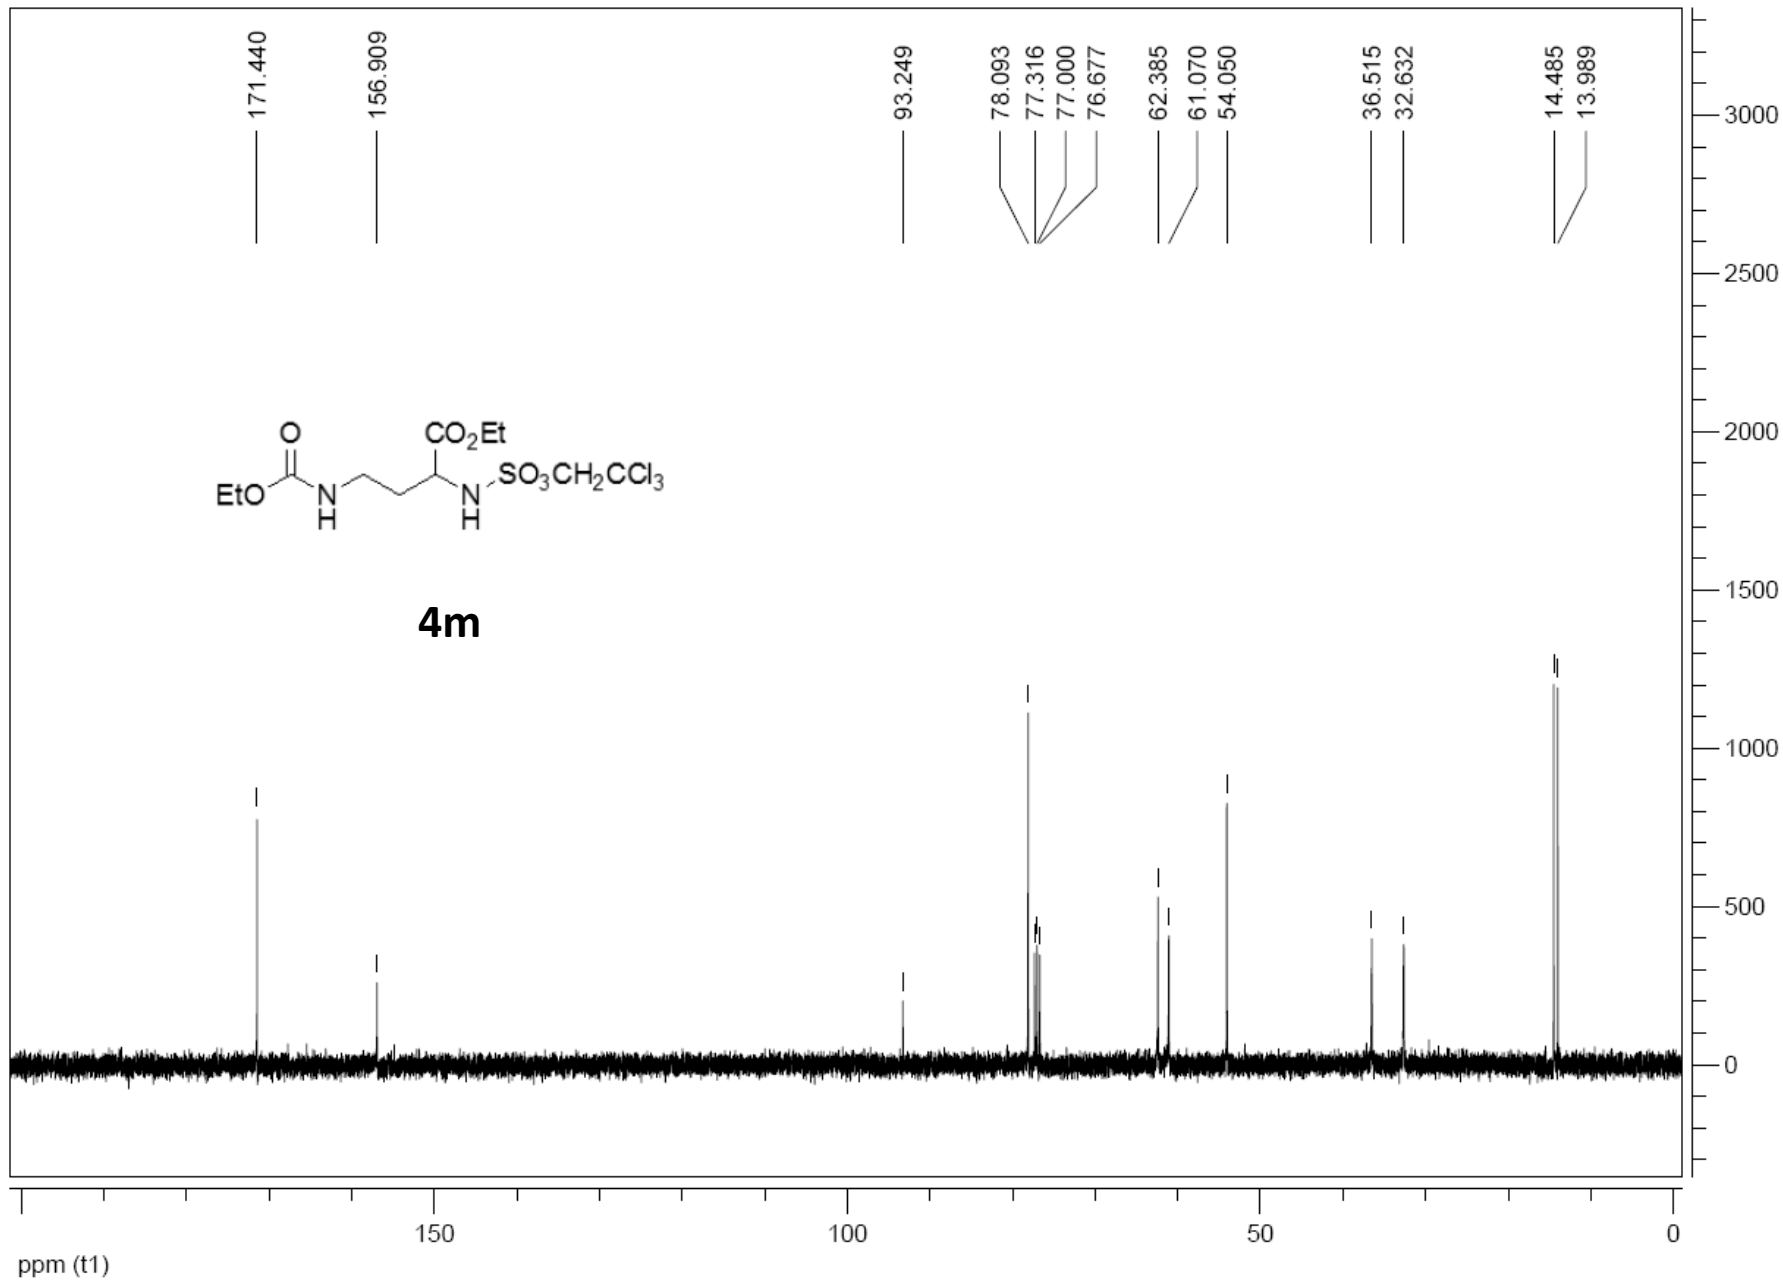

Supplement: NIHMS409943-supplement-2.pdf [file NIHMS409943-supplement-2.pdf]
