# Supplementary material
Source: PubMed Central journal article supplement (PMC3466332)
Supplement: NIHMS409943-supplement-1.pdf [file NIHMS409943-supplement-1.pdf]

## Supporting Information 1

### **Stereoselective Radical Amination of Electron-Deficient C(sp<sup>3</sup>)-H Bonds by Co(II)-Based Metalloradical Catalysis: Direct Synthesis of $\alpha$ -Amino Acid Derivatives via $\alpha$ -C-H Amination**

Hongjian Lu,<sup>†,‡</sup> Yang Hu,<sup>†</sup> Huiling Jiang,<sup>†</sup> Lukasz Wojtas,<sup>†</sup> X. Peter Zhang<sup>\*,†</sup>

<sup>†</sup>Department of Chemistry, University of South Florida, Tampa, Florida 33620-5250;

<sup>‡</sup> Institute of Chemistry and BioMedical Sciences, Nanjing University, Nanjing 210064, P. R. China

## Table of Contents

|                                                                      |     |
|----------------------------------------------------------------------|-----|
| General Considerations                                               | S3  |
| General Procedure for Synthesis of Sulfamoyl Azides                  | S3  |
| General Procedure for C-H Amination                                  | S4  |
| X-ray Crystallography for compound <b>2f</b> , <b>2i</b> , <b>2j</b> | S17 |
| DSC spectrogram of <b>1a</b>                                         | S21 |
| Reference                                                            | S22 |

**General Considerations.** All cross-coupling and C-H amination reactions were performed under nitrogen in oven-dried glassware following standard Schlenk techniques. 4 Å molecular sieves were dried in a vacuum oven prior to use. Anhydrous benzene was purchased from Sigma-Aldrich and used without further purification. [Co(**P1**)] and [Co(**P2**)] was prepared by following the literature.<sup>1</sup> Thin layer chromatography was performed on Merck TLC plates (silica gel 60 F254). Flash column chromatography was performed with ICN silica gel (60 Å, 230-400 mesh, 32-63 μm). <sup>1</sup>H NMR and <sup>13</sup>C NMR were recorded on a Varian Inova400 (400 MHz), Inova500 (500 MHz), Inova600 (600 MHz) or Bruker250 (250 MHz) instrument with chemical shifts reported relative to residual solvent. Infrared spectra were measured with a Nicolet Avatar 320 spectrometer with a Smart Miracle accessory. HRMS data was obtained on an Agilent 1100 LC/MS/TOF mass spectrometer.

## General Experimental Procedures for Preparation of Sulfamoyl Azides

### Method A

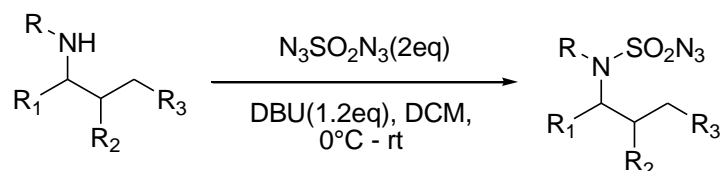

Sulphuryl Azide.<sup>2</sup> To a solution of sodium azide (2.6 g, 40 mmol) and pyridine (1.58 g, 20 mmol) in acetonitrile (50 ml) at 0 °C, sulphuryl chloride (1.34 g, 10 mmol) in acetonitrile (20 ml) was added dropwise for 10 min. Then the reaction mixture was stirred for a further 1 h at room temperature. After addition of 30 ml DCM, the mixture was poured into ice-cold water and extracted with DCM (3 x 20 mL). The combined organic layer was washed with hydrochloric acid (1 mol/L in H<sub>2</sub>O), water, potassium hydroxide (1 mol/L in H<sub>2</sub>O), hydrochloric acid (1 mol/L in H<sub>2</sub>O), and water. After drying (Na<sub>2</sub>SO<sub>4</sub>), the sulphuryl azide solution was used directly for the subsequent reaction. This solution can be stored in the refrigerator for at least two months without significant decomposition.

To a solution of N<sub>3</sub>SO<sub>2</sub>N<sub>3</sub> (2 eq, 0.25 mol/L in DCM) at 0 °C, a mixture of amine (1 eq) and DBU (1.2 eq) in DCM was added dropwise via syringe. The reaction showed almost complete consumption of the starting amine after 5 min to 3 hours when monitored by TLC, then the majority of the solvent was removed under reduced pressure at room temperature. Purification of this mixture by chromatography on silica gel (as given below) afforded the sulfamoyl azide. Note: Some azides could be explosive and should be handled carefully. Based on DSC experiments (see Page S24, DSC spectrogram of azide **1a**), this type of azide is stable under the reaction conditions used.

## Method B

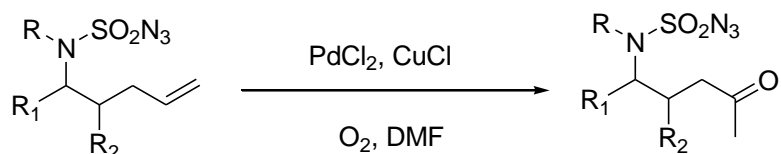

A solution of *N*-bishomoallylic sulfamoyl azides<sup>3</sup> (0.5 mmol) in a 10:1 DMF/H<sub>2</sub>O mixture (11 ml) was treated with PdCl<sub>2</sub> (35 mg, 0.2 mmol) and CuCl (248 mg, 2.5 mmol), then the reaction mixture was stirred under O<sub>2</sub> at room temperature for 6h. 30ml H<sub>2</sub>O was added to the reaction mixture. Extracted with Et<sub>2</sub>O(3 x 30ml). The combined organic layer was washed by water. After drying (Na<sub>2</sub>SO<sub>4</sub>), removing most of solvent at room temperature, the reaction mixture was purified by chromatography on silica gel (as given below) to afford desired azides. Note: Some azides could be explosive and should be handled carefully. Based on DSC experiments (see Page S24, DSC spectrogram of azide **1a**), this type of azide is stable under the reaction conditions used.

## Method C

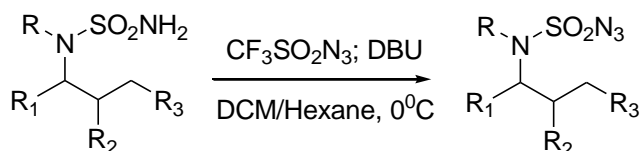

To a solution of the sulfamoyl amide (1eq) and DBU (1.2eq) in DCM at 0 °C, a solution of CF<sub>3</sub>SO<sub>2</sub>N<sub>3</sub> (about 2eq) in hexane was added drop wise. The reaction showed almost complete consumption of the starting sulfamoyl amide after five minutes to one hour when monitored by TLC. Then the majority of the DCM was removed carefully under reduced pressure at room temperature. Purification of this mixture by chromatography on silica gel (as given below) afforded the corresponding sulfamoyl azide. Note: Some azides could be explosive and should be handled carefully. Based on DSC experiments (see Page S24, DSC spectrogram of azide **1a**), this type of azide is stable under the reaction conditions used.

## General Procedure for C–H Amination of Sulfamoyl Azides

An oven dried Schlenk tube was charged with catalyst (0.002 mmol) and 4Å MS (50 mg), then evacuated and back filled with nitrogen. The Teflon screw cap was replaced with a rubber septum and then an approximately 0.5 ml portion of benzene was added, then azide (0.1 mmol), followed by the remaining benzene (total 1 mL). The Schlenk tube was then purged with nitrogen for 2 minutes and the rubber septum was replaced with a Teflon screw cap. The Schlenk tube was then placed in an oil bath for the desired time and temperature. After completion of the reaction, the reaction mixture was purified by flash column chromatography. The fractions containing product were collected and concentrated by rotary evaporation to afford the target compound.

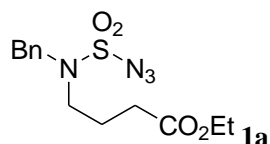

Prepared according to METHOD A (yield: 74%). Purified by chromatography on silica gel (4:1 hexanes/EtOAc), colorless liquid, TLC  $R_f = 0.43$  (4:1 hexanes/EtOAc).  $^1\text{H}$  NMR (250 MHz,  $\text{CDCl}_3$ ):  $\delta$  7.36-7.32 (m, 5H), 4.44 (s, 2H), 4.08 (q,  $J = 7.3$  Hz, 2H), 3.29-3.22 (m, 2H), 2.24 (t,  $J = 7.3$  Hz, 2H), 1.90-1.77 (m, 2H), 1.21 (t,  $J = 7.3$  Hz, 3H).  $^{13}\text{C}$  NMR (62.9 MHz,  $\text{CDCl}_3$ ):  $\delta$  172.4, 134.5, 128.9, 128.6, 128.5, 60.6, 52.6, 47.8, 30.7, 22.5, 14.1. IR (neat,  $\text{cm}^{-1}$ ): 2125, 1731, 1375, 1164, 1099, 737, 699.

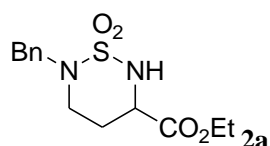

Yield: 98%. Purified by chromatography on silica gel (gradient elution: 4:1-2:1 hexanes/EtOAc), white solid, TLC  $R_f = 0.17$  (4:1 hexanes/EtOAc).  $^1\text{H}$  NMR (250 MHz,  $\text{CDCl}_3$ ):  $\delta$  7.34-7.25 (m, 5H), 4.71 (d,  $J = 8.8$  Hz, 1H), 4.44, 4.00 (AB q,  $J = 13.8$  Hz, each 1H), 4.39-4.32 (m, 1H), 4.23 (q,  $J = 7.0$  Hz, 2H), 3.40 (dt,  $J = 3.3, 13.3$  Hz, 1H), 3.19-3.09 (m, 1H), 1.94-1.67 (m, 2H), 1.27 (t,  $J = 7.0$  Hz, 3H).  $^{13}\text{C}$  NMR (62.9 MHz,  $\text{CDCl}_3$ ):  $\delta$  169.5, 135.1, 128.7, 128.1, 62.2, 57.4, 51.6, 47.0, 25.9, 14.1. IR (neat,  $\text{cm}^{-1}$ ): 1742, 1331, 1306, 1206, 1165, 1144, 1114, 1036, 861, 776, 747, 694. HRMS (ESI) ( $[\text{M}+\text{Na}]^+$ ) Calcd. for  $\text{C}_{13}\text{H}_{18}\text{N}_2\text{O}_4\text{SNa}$  321.0880, Found 321.0875.

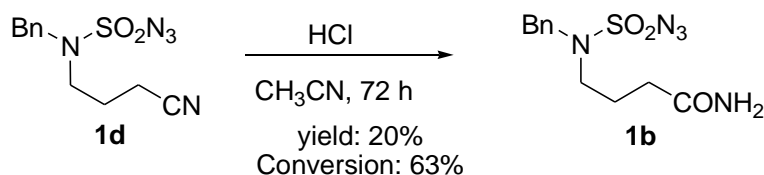

To a solution of conc. HCl (1 ml) and  $\text{CH}_3\text{CN}$  (1 ml) was added azide **1d** (279.0mg, 1.0 mmol), the reaction continued for 3 days. The reaction mixture was then diluted with  $\text{CH}_2\text{Cl}_2$  (10 mL) and added to a separatory funnel.  $\text{H}_2\text{O}$  (10 mL) was added and the aqueous and organic layers were separated. The aqueous layer was extracted with  $\text{CH}_2\text{Cl}_2$  (3 x 10 mL). The combined organic layer was then dried over  $\text{Na}_2\text{SO}_4$ , filtered, and concentrated *in vacuo*. Purified by chromatography on silica gel (gradient elution: 1:1(hexanes/EtOAc)-1/20 (EtOAc/MeOH)) to afford **1b** (59.4mg, 0.2mmol) in 20% yield, colorless liquid, TLC  $R_f = 0.38$  (EtOAc).  $^1\text{H}$  NMR (250 MHz,  $\text{CDCl}_3$ ):  $\delta$  7.36 (s, 5H), 5.40 (brs, 2H), 4.45 (s, 2H), 3.27 (t,  $J = 7.0$  Hz, 2H), 2.17 (t,  $J = 7.0$  Hz, 2H), 1.92-1.80 (m, 2H).  $^{13}\text{C}$  NMR (62.9 MHz,  $\text{CDCl}_3$ ):  $\delta$  173.8, 134.5, 128.9, 128.8, 128.5, 52.6, 47.9, 31.8, 22.7. IR (neat,  $\text{cm}^{-1}$ ): 3356, 2126, 1666, 1375, 1205, 1163, 1012, 784, 737, 698.

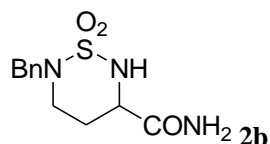

Yield: 97%. Purified by chromatography on silica gel (gradient elution: 30:1-15:1 CHCl<sub>3</sub>/MeOH), white solid, TLC R<sub>f</sub> = 0.50 (10:1 DCM/MeOH). <sup>1</sup>H NMR (250 MHz, (CD<sub>3</sub>)<sub>2</sub>CO): δ 7.42-7.28 (m, 5H), 7.10 (brs, 1H), 6.68 (brs, 1H), 5.75 (brs, 1H), 4.40, 4.07 (AB q, *J* = 14.3 Hz, each 1H), 4.27 (dd, *J* = 6.5, 8.5 Hz, 1H), 3.44-3.31(m, 1H), 3.19 (dt, *J* = 13.5, 4.0 Hz, 1H), 1.92-1.82 (m, 2H). <sup>13</sup>C NMR (62.9 MHz, (CD<sub>3</sub>)<sub>2</sub>CO): δ 171.4, 137.4, 129.4, 129.3, 128.5, 59.1, 52.0, 48.4, 25.7. IR (neat, cm<sup>-1</sup>): 1674, 1326, 1204, 1142, 1099, 810, 781, 752, 699. HRMS (ESI) ([M+H]<sup>+</sup>) Calcd. for C<sub>11</sub>H<sub>16</sub>N<sub>3</sub>O<sub>3</sub>S 270.0907, Found 270.0905.

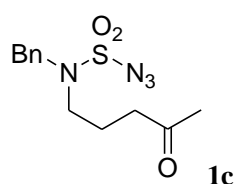

Prepared according to METHOD B (yield: 47%). Purified by chromatography on silica gel (the gradient elution: 4:1-2:1 Hexanes/ EtOAc), colorless liquid, TLC R<sub>f</sub> = 0.70 (1:1 Hexane/EtOAc). <sup>1</sup>H NMR (250 MHz, CDCl<sub>3</sub>): δ 7.35 (brs, 5H), 4.43 (s, 2H), 3.21 (t, *J* = 7.3 Hz, 2H), 2.38 (t, *J* = 6.8 Hz, 2H), 2.06 (s, 3H), 1.83-1.70 (m, 2H). <sup>13</sup>C NMR (62.9 MHz, CDCl<sub>3</sub>): δ 207.4, 134.5, 128.9, 128.7, 128.5, 52.6, 47.8, 39.5, 29.9, 20.9. IR (neat, cm<sup>-1</sup>): 2124, 1714, 1373, 1163, 1025, 774, 735, 698.

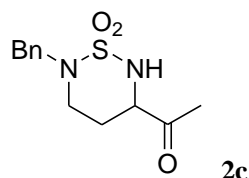

Yield: 99%. Purified by chromatography on silica gel (the gradient elution: 4:1-2:1 Hexanes/ EtOAc), colorless liquid, TLC R<sub>f</sub> = 0.39 (1:1 Hexane/EtOAc). <sup>1</sup>H NMR (400 MHz, CDCl<sub>3</sub>): δ 7.35-7.27 (m, 5H), 4.79 (d, *J* = 9.6 Hz, 1H), 4.47-4.39 (m, 1H), 4.41, 4.00 (AB q, *J* = 14.0 Hz, each 1H), 3.42 (dt, *J* = 2.8, 13.2 Hz, 1H), 3.18 (dq, *J* = 13.2, 3.2 Hz, 1H), 2.24 (s, 3H), 1.86 (dq, *J* = 14.0, 3.2 Hz, 1H), 1.66-1.54 (m, 1H). <sup>13</sup>C NMR (100 MHz, CDCl<sub>3</sub>): δ 202.4, 135.0, 128.7, 128.1, 63.2, 51.6, 47.1, 26.8, 25.2. IR (neat, cm<sup>-1</sup>): 1717, 1336, 1160, 1105, 808, 767, 725, 697. HRMS (ESI) ([M+H]<sup>+</sup>) Calcd. for C<sub>12</sub>H<sub>17</sub>N<sub>2</sub>O<sub>3</sub>S 269.0954, Found 269.0950.

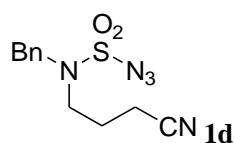

Prepared according to METHOD A (yield: 59%). Purified by chromatography on

silica gel (4:1 hexanes/EtOAc), colorless liquid, TLC  $R_f = 0.50$  (4:1 hexanes/EtOAc).  $^1\text{H}$  NMR (250 MHz,  $\text{CDCl}_3$ ):  $\delta$  7.44-7.31 (m, 5H), 4.43 (s, 2H), 3.32 (t,  $J = 7.0$  Hz, 2H), 2.23 (t,  $J = 7.3$  Hz, 2H), 1.85-1.73 (m, 2H).  $^{13}\text{C}$  NMR (62.9 MHz,  $\text{CDCl}_3$ ):  $\delta$  134.1, 129.1, 128.9, 128.7, 118.5, 53.8, 47.7, 24.0, 14.4. IR (neat,  $\text{cm}^{-1}$ ): 2128, 1376, 1200, 1164, 1104, 782, 736, 698.

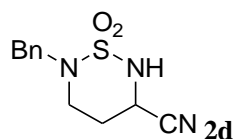

Yield: 99%. Purified by chromatography on silica gel (4:1 hexanes/EtOAc), white liquid; TLC  $R_f = 0.30$  (4/1 hexanes/EtOAc).  $^1\text{H}$  NMR (250 MHz,  $\text{CDCl}_3$ ):  $\delta$  7.41-7.28 (m, 5H), 4.66 (br, 2H), 4.41, 4.11 (AB q,  $J = 13.8$  Hz, each 1H), 3.44-3.23 (m, 2H), 2.03-1.96 (m, 2H).  $^{13}\text{C}$  NMR (62.9 MHz,  $\text{CDCl}_3$ ):  $\delta$  134.3, 128.9, 128.7, 128.4, 116.0, 51.9, 46.1, 46.0, 26.3. IR (neat,  $\text{cm}^{-1}$ ): 1363, 1168, 1120, 754, 735, 695. HRMS (ESI) ( $[\text{M}+\text{Na}]^+$ ) Calcd. for  $\text{C}_{11}\text{H}_{13}\text{N}_3\text{O}_2\text{SNa}$  274.0621, Found 274.0618.

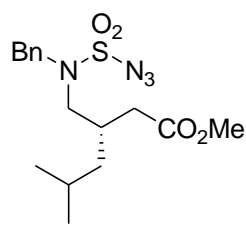

Prepared according to METHOD A (yield 20%). Purified by chromatography on silica gel (the gradient elution: 10:1-4:1 Hexane/ EtOAc), colorless liquid, TLC  $R_f = 0.45$  (4:1 Hexane/EtOAc).  $^1\text{H}$  NMR (400 MHz,  $\text{CDCl}_3$ ):  $\delta$  7.34 (brs, 5H), 4.46 (dd,  $J = 35.2, 15.2$  Hz, 2H), 3.63 (s, 3H), 3.23-3.01 (m, 2H), 2.30-2.14 (m, 3H), 1.49-1.42 (m, 1H), 1.11-1.05 (m, 2H), 0.80 (d,  $J = 6.8$  Hz, 3H), 0.73 (d,  $J = 6.8$  Hz, 3H).  $^{13}\text{C}$  NMR (100 MHz,  $\text{CDCl}_3$ ):  $\delta$  172.9, 134.3, 129.0, 128.8, 128.5, 53.4, 53.0, 51.6, 41.1, 36.2, 31.1, 25.1, 22.8, 22.1. IR: 2124, 1730, 1375, 1163, 1099, 1018, 735, 698.

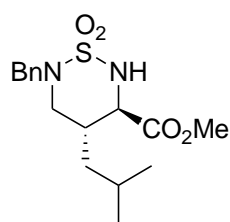

Yield: 90%. Purified by chromatography on silica gel (4:1 Hexane/ EtOAc), pale yellow solid, TLC  $R_f = 0.28$  (4:1 Hexane/EtOAc).  $^1\text{H}$  NMR (400 MHz,  $\text{CDCl}_3$ ):  $\delta$  7.36-7.27 (m, 5H), 4.83 (d,  $J = 11.2$  Hz, 0.25H), 4.78 (d,  $J = 13.2$  Hz, 0.25H), 4.62-4.55 (m, 1H), 4.46 (d,  $J = 13.6$  Hz, 0.75H), 4.05 (t,  $J = 8.1$  Hz, 0.75H), 3.98 (d,  $J = 14.0$  Hz, 0.75H), 3.77 (s, 2.25H), 3.75 (s, 0.75H), 3.51 (d,  $J = 13.6$  Hz, 0.25H), 3.21-3.16 (m, 0.25H), 3.10-2.91 (m, 1.75H), 2.03-1.96 (m, 0.25H), 1.93-1.84 (m, 0.75H), 1.61-1.48 (m, 0.25H), 1.29-1.22 (m, 1H), 1.06-0.92 (m, 1.5H), 0.90-0.81 (m,

0.25H), 0.76 (d,  $J = 6.4$  Hz, 2.25H), 0.65 (d,  $J = 6.4$  Hz, 3H), 0.61 (d,  $J = 6.4$  Hz, 0.75H).  $^{13}\text{C}$  NMR (100 MHz,  $\text{CDCl}_3$ ):  $\delta$  169.8, 169.0, 135.0, 134.9, 129.0, 128.7, 128.6, 128.5, 128.1, 63.0, 61.2, 52.7, 52.0, 51.9, 51.3, 50.0, 37.5, 34.4, 33.7, 33.4, 25.1, 24.6, 23.4, 23.3, 21.1, 20.9. IR (neat,  $\text{cm}^{-1}$ ): 1739, 1345, 1297, 1169, 1098, 784, 742, 700. HRMS (ESI) ( $[\text{M}+\text{Na}]^+$ ) Calcd. for  $\text{C}_{16}\text{H}_{24}\text{N}_2\text{O}_4\text{SNa}$  363.1349, Found 363.1358.

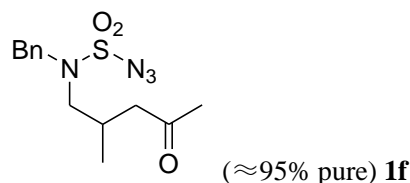

Prepared according to METHOD B (yield 53%). Purified by chromatography on silica gel (4:1 Hexanes/ EtOAc), colorless liquid, TLC  $R_f = 0.26$  (4:1 Hexane/EtOAc).  $^1\text{H}$  NMR (400 MHz,  $\text{CDCl}_3$ ):  $\delta$  7.37-7.31 (m, 5H), 4.44 (d,  $J = 3.6$  Hz, 2H), 3.14 (dd,  $J = 7.6, 14.0$  Hz, 1H), 3.01 (dd,  $J = 6.8, 14.0$  Hz, 1H), 2.45 (dd,  $J = 5.2, 16.8$  Hz, 1H), 2.31-2.16 (m, 2H), 2.05 (s, 3H), 0.86 (t,  $J = 6.4$  Hz, 3H).  $^{13}\text{C}$  NMR (100 MHz,  $\text{CDCl}_3$ ):  $\delta$  207.2, 134.3, 129.0, 128.8, 128.5, 54.1, 53.1, 47.4, 30.3, 27.1, 17.6. IR (neat,  $\text{cm}^{-1}$ ): 2125, 1713, 1373, 1205, 1165, 1024, 779, 737.

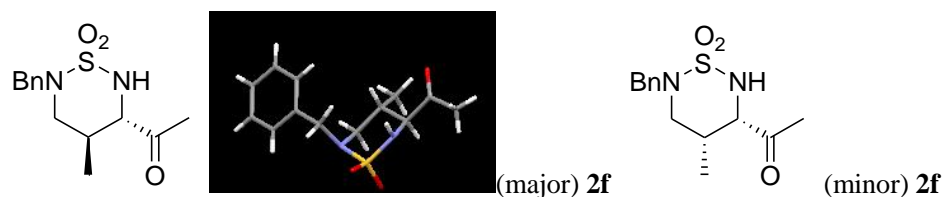

Yield: 91(major/minor = 5.3/1). Purified by chromatography on silica gel (the gradient elution: 4:1-2:1 Hexane/ EtOAc). Major one: white solid, TLC  $R_f = 0.64$  (1:1 Hexane/EtOAc).  $^1\text{H}$  NMR (400 MHz,  $\text{CDCl}_3$ ):  $\delta$  7.35-7.28 (m, 5H), 4.52 (d,  $J = 10.4$  Hz, 1H), 4.45, 3.93 (AB q,  $J = 14.0$  Hz, each 1H), 4.10 (t,  $J = 10.4$  Hz, 1H), 3.05-2.94 (m, 2H), 2.32 (s, 3H), 2.00-1.91 (m, 1H), 0.88 (d,  $J = 6.8$  Hz, 3H).  $^{13}\text{C}$  NMR (100 MHz,  $\text{CDCl}_3$ ):  $\delta$  204.1, 135.0, 128.7, 128.1, 67.7, 54.1, 51.8, 31.3, 30.5, 14.6. IR (neat,  $\text{cm}^{-1}$ ): 1718, 1346, 1167, 1107, 1033, 1011, 894, 780, 736, 699. HRMS (ESI) ( $[\text{M}+\text{Na}]^+$ ) Calcd. for  $\text{C}_{13}\text{H}_{18}\text{N}_2\text{O}_3\text{SNa}$  305.0930, Found 305.0927. Minor one: white solid, TLC  $R_f = 0.57$  (1:1 Hexane/EtOAc).  $^1\text{H}$  NMR (400 MHz,  $\text{CDCl}_3$ ):  $\delta$  7.36-7.26 (m, 5H), 4.99 (d,  $J = 10.0$  Hz, 1H), 4.76, 3.57 (AB q,  $J = 14.0$  Hz, each 1H), 4.59 (dd,  $J = 10.4, 3.2$  Hz, 1H), 3.36 (dd,  $J = 12.4, 2.8$  Hz, 1H), 2.85 (dd,  $J = 12.4, 2.4$  Hz, 1H), 2.22-2.16 (m, 1H), 2.18 (s, 3H), 0.89 (d,  $J = 6.8$  Hz, 3h).  $^{13}\text{C}$  NMR (100 MHz,  $\text{CDCl}_3$ ):  $\delta$  201.4, 135.0, 128.8, 128.7, 128.0, 66.3, 54.0, 51.5, 29.9, 26.7, 11.2. IR (neat,  $\text{cm}^{-1}$ ): 1725, 1359, 1333, 1293, 1171, 1091, 1033, 1009, 774, 742, 701. HRMS (ESI) ( $[\text{M}+\text{H}]^+$ ) Calcd. for  $\text{C}_{13}\text{H}_{19}\text{N}_2\text{O}_3\text{S}$  283.1111, Found 283.1107.



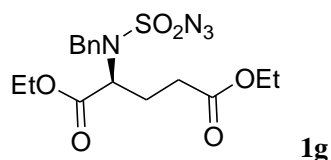

Prepared according to METHOD A (yield 12%). Purified by chromatography on silica gel (gradient elution: 10:1-6:1 Hexanes/ EtOAc), colorless liquid, TLC  $R_f$  = 0.39 (4:1 Hexane/EtOAc).  $^1\text{H}$  NMR (250 MHz,  $\text{CDCl}_3$ ):  $\delta$  7.39-7.26 (m, 5H), 4.68, 4.41 (AB q,  $J$  = 15.8 Hz, each 1H), 4.52-4.45 (m, 1H), 4.22-3.98 (m, 4H), 2.26-2.08 (m, 3H), 1.97-1.78 (m, 1H), 1.25 (t,  $J$  = 7.0 Hz, 3H), 1.18 (t,  $J$  = 7.0 Hz, 3H).  $^{13}\text{C}$  NMR (63.9 MHz,  $\text{CDCl}_3$ ):  $\delta$  172.2, 169.6, 135.3, 128.8, 128.7, 128.4, 62.2, 60.9, 60.6, 51.6, 30.0, 24.8, 14.2, 14.0. IR (neat,  $\text{cm}^{-1}$ ): 2129, 1733, 1377, 1164, 1021, 805, 743.

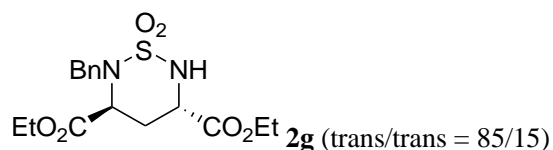

Yield: 99%. Purified by chromatography on silica gel (1:2 Hexanes/ EtOAc), colorless liquid, TLC  $R_f$  = 0.6 (1:1 Hexane/EtOAc). Major One:  $^1\text{H}$  NMR (400 MHz,  $\text{CDCl}_3$ ):  $\delta$  7.40-7.28 (m, 5H), 4.76-4.52 (m, 4H), 4.27-4.20 (m, 4H), 3.85 (dd,  $J$  = 2.4, 5.2 Hz, 1H), 2.40 (dt,  $J$  = 13.6, 2.8 Hz, 1H), 1.69-1.60 (m, 1H), 1.33 (t,  $J$  = 6.8 Hz, 3H), 1.28 (t,  $J$  = 7.2 Hz, 3H).  $^{13}\text{C}$  NMR (100 MHz,  $\text{CDCl}_3$ ):  $\delta$  169.8, 169.7, 134.9, 128.8, 128.3, 62.3, 61.9, 56.4, 55.1, 51.9, 26.1, 14.1, 14.0. IR (neat,  $\text{cm}^{-1}$ ): 1732, 1372, 1210, 1167, 1112, 1026, 774, 734, 697. HRMS (ESI) ( $[\text{M}+\text{H}]^+$ ) Calcd. for  $\text{C}_{16}\text{H}_{23}\text{N}_2\text{O}_6\text{S}$  371.1271, Found 371.1263.

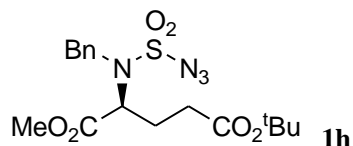

Prepared according to METHOD C (yield 56%). Purified by chromatography on silica gel (the gradient elution: 10:1-4:1 Hexane/ EtOAc), colorless liquid, TLC  $R_f$  = 0.45 (4:1 Hexane/EtOAc).  $^1\text{H}$  NMR (400 MHz,  $\text{CDCl}_3$ ):  $\delta$  7.40-7.25 (m, 5H), 4.68 (d,  $J$  = 16.0 Hz, 1H), 4.57-4.52 (m, 1H), 4.43 (d,  $J$  = 16.0 Hz, 1H), 3.68 (s, 3H), 2.21-2.06 (m, 3H), 1.88-1.81 (m, 1H), 1.38 (s, 9H).  $^{13}\text{C}$  NMR (100 MHz,  $\text{CDCl}_3$ ):  $\delta$  171.3, 170.1, 135.3, 128.7, 128.4, 80.8, 60.8, 52.7, 51.3, 31.0, 28.0, 24.8. IR (neat,  $\text{cm}^{-1}$ ): 2129, 1725, 1367, 1205, 1154, 744, 699.

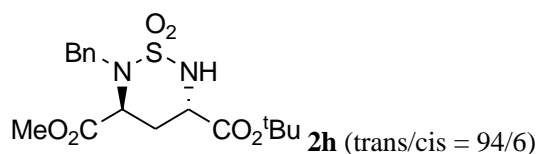

Yield: 94%. Purified by chromatography on silica gel (4:1 Hexane/ EtOAc), colorless liquid, TLC  $R_f$  = 0.17 (4:1 Hexane/EtOAc). Major One:  $^1\text{H}$  NMR (400 MHz,  $\text{CDCl}_3$ ):  $\delta$  7.40-7.25 (m, 5H), 4.68-4.50 (m, 4H), 3.86 (dd,  $J$  = 5.6, 2.4 Hz, 1H), 3.78 (s, 3H),

2.38-2.33 (m, 1H), 1.66-1.58 (m, 1H), 1.45 (s, 9H).  $^{13}\text{C}$  NMR (100 MHz,  $\text{CDCl}_3$ ): 170.4, 168.8, 134.8, 128.9, 128.8, 128.3, 83.5, 56.4, 55.5, 52.7, 51.9, 27.9, 25.8. IR (neat,  $\text{cm}^{-1}$ ): 1731, 1367, 1220, 1154, 1116, 753, 697. HRMS (ESI) ( $[\text{M}+\text{H}]^+$ ) Calcd. for  $\text{C}_{17}\text{H}_{25}\text{N}_2\text{O}_6\text{S}$  385.1428, Found 385.1447.

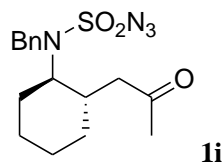

Prepared according to METHOD B (yield 12%). Purified by chromatography on silica gel (10:1 Hexane/ EtOAc), white solid, TLC  $R_f = 0.19$  (10:1 Hexane/EtOAc).  $^1\text{H}$  NMR (400 MHz,  $\text{CDCl}_3$ ):  $\delta$  7.41-7.27 (m, 5H), 4.49-4.19 (m, 2H), 3.44 (brs, 1H), 2.61-2.55 (m, 1H), 1.98-1.92 (m, 2H), 1.89 (s, 3H), 1.85-1.78 (m, 2H), 1.63-1.56 (m, 2H), 1.30-1.10 (m, 3H), 0.92-0.79 (m, 1H).  $^{13}\text{C}$  NMR(100 MHz,  $\text{CDCl}_3$ ):  $\delta$  207.3, 135.8, 129.0, 128.8, 128.3, 64.2, 46.5, 36.3, 32.7, 30.5, 30.1, 25.9, 25.1. IR (neat,  $\text{cm}^{-1}$ ): 2123, 1716, 1371, 1203, 1165, 1026, 737.

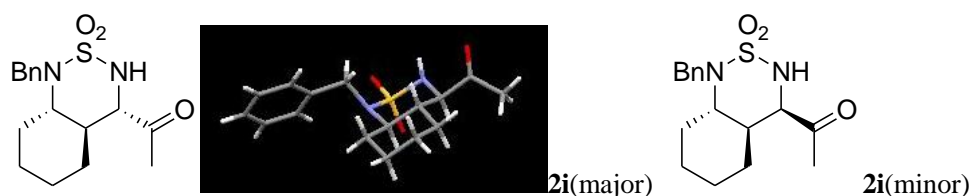

Yield: 91% (Major/minor = 3.2/1). Purified by chromatography on silica gel (the gradient elution: 4:1-2:1 Hexane/ EtOAc). Major one: white solid, TLC  $R_f = 0.42$  (2:1 Hexane/EtOAc).  $^1\text{H}$  NMR (400 MHz,  $\text{CDCl}_3$ ):  $\delta$  7.36-7.28 (m, 4H), 7.25-7.20 (m, 1H), 4.40 (d,  $J = 10.4$  Hz, 1H), 4.39, 4.26 (AB q,  $J = 16.4$  Hz, each 1H), 4.19 (t,  $J = 10.4$  Hz, 1H), 3.62 (dt,  $J = 3.6, 11.2$  Hz, 1H), 2.31 (s, 3H), 1.82-1.76 (m, 1H), 1.73-1.59 (m, 4H), 1.23-1.09 (m, 4H).  $^{13}\text{C}$  NMR(62.9 MHz,  $\text{CDCl}_3$ ):  $\delta$  204.9, 138.7, 128.5, 127.2, 127.1, 66.6, 63.7, 48.2, 39.6, 31.3, 31.1, 27.6, 24.8, 24.7. IR (neat,  $\text{cm}^{-1}$ ): 1719, 1357, 1169, 1128, 1016, 830, 787, 735, 698. HRMS (ESI) ( $[\text{M}+\text{Na}]^+$ ) Calcd. for  $\text{C}_{16}\text{H}_{22}\text{N}_2\text{O}_3\text{SNa}$  345.1243, Found 345.1253. Minor one: white solid, TLC  $R_f = 0.32$  (2:1 Hexane/EtOAc).  $^1\text{H}$  NMR (400 MHz,  $\text{CDCl}_3$ ):  $\delta$  7.35-7.28 (m, 4H), 7.26-7.21 (m, 1H), 4.40 (d,  $J = 6.4$  Hz, 1H), 4.55, 4.22 (AB q,  $J = 16.4$  Hz, each 1H), 3.97 (t,  $J = 6.4$  Hz, 1H), 3.51 (dt,  $J = 3.6, 10.8$  Hz, 1H), 2.28 (s, 3H), 2.13-2.02 (m, 1H), 1.87-1.83 (m, 1H), 1.73-1.52 (m, 3H), 1.23-1.09 (m, 4H).  $^{13}\text{C}$  NMR(100 MHz,  $\text{CDCl}_3$ ):  $\delta$  203.8, 138.5, 128.5, 127.4, 127.3, 63.9, 60.9, 49.3, 41.5, 31.6, 29.1, 27.5, 25.8, 24.6. IR (neat,  $\text{cm}^{-1}$ ): 1716, 1453, 1347, 1180, 1163, 1135, 1015, 860, 795, 733, 699. HRMS (ESI) ( $[\text{M}+\text{Na}]^+$ ) Calcd. for  $\text{C}_{16}\text{H}_{22}\text{N}_2\text{O}_3\text{SNa}$  345.1243, Found 345.1254.

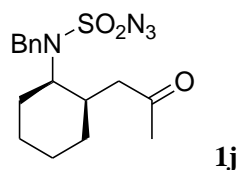

Prepared according to METHOD B (yield 59%). Purified by chromatography on silica

gel (the gradient elution: 10:1-4:1 Hexane/ EtOAc), colorless liquid, TLC  $R_f$  = 0.29 (4:1 Hexane/EtOAc).  $^1\text{H}$  NMR (400 MHz,  $\text{CDCl}_3$ ):  $\delta$  7.38-7.28 (m, 5H), 4.54, 4.47 (AB q,  $J$  = 16.4 Hz, each 1H), 3.75-3.69 (m, 1H), 2.75-2.69 (m, 1H), 2.51 (dd,  $J$  = 4.0, 16.4 Hz, 1H), 2.41 (dd,  $J$  = 9.6, 16.4 Hz, 1H), 2.05 (s, 3H), 1.82-1.73 (m, 3H), 1.59-1.53 (m, 1H), 1.46-1.37 (m, 2H), 1.28-1.20 (m, 2H).  $^{13}\text{C}$  NMR (100 MHz,  $\text{CDCl}_3$ ):  $\delta$  207.5, 136.4, 128.8, 128.0, 127.8, 63.6, 51.9, 40.6, 33.0, 30.1, 29.3, 26.3, 25.8, 19.6. IR (neat,  $\text{cm}^{-1}$ ): 2123, 1715, 1375, 1205, 1165, 735.

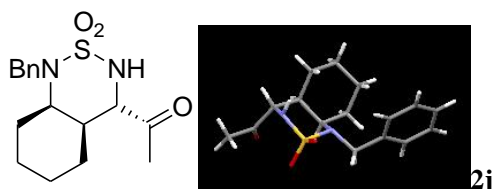

Yield: 95%. Purified by chromatography on silica gel (the gradient elution: 4:1-2:1 Hexane/ EtOAc), white solid, TLC  $R_f$  = 0.57 (1:1 Hexane/EtOAc).  $^1\text{H}$  NMR (400 MHz,  $\text{CDCl}_3$ ):  $\delta$  7.36-7.26 (m, 5H), 4.57, 4.13 (AB q,  $J$  = 14.8 Hz, each 1H), 4.59-4.48 (m, 2H), 3.16 (dt,  $J$  = 11.6, 4.0 Hz, 1H), 2.34 (s, 3H), 2.24-2.06 (m, 2H), 1.95-1.88 (m, 1H), 1.77-1.70 (m, 1H), 1.66-1.60 (m, 1H), 1.53-1.48 (m, 1H), 1.38-1.33 (m, 2H), 1.10-1.04 (m, 1H).  $^{13}\text{C}$  NMR (100 MHz,  $\text{CDCl}_3$ ):  $\delta$  204.7, 135.9, 128.7, 128.3, 127.9, 61.1, 59.2, 49.1, 38.1, 30.6, 26.9, 24.7, 24.2, 21.4. IR (neat,  $\text{cm}^{-1}$ ): 1715, 1306, 1180, 1150, 1121, 1035, 1027, 838, 795, 720, 696. HRMS (ESI) ( $[\text{M}+\text{Na}]^+$ ) Calcd. for  $\text{C}_{16}\text{H}_{22}\text{N}_2\text{O}_3\text{SNa}$  345.1243, Found 345.1252.

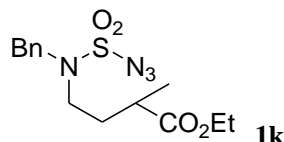

Prepared according to METHOD A (yield 69%). Purified by chromatography on silica gel (the gradient elution: 10:1-4:1 Hexane/ EtOAc), colorless liquid, TLC  $R_f$  = 0.44 (4:1 Hexane/EtOAc).  $^1\text{H}$  NMR (400 MHz,  $\text{CDCl}_3$ ):  $\delta$  7.37-7.28 (m, 5H), 4.42 (s, 2H), 4.06 (q,  $J$  = 7.2 Hz, 2H), 3.30-3.15 (m, 2H), 2.39-2.30 (m, 1H), 1.97-1.86 (m, 1H), 1.66-1.56 (m, 1H), 1.19 (t,  $J$  = 7.2 Hz, 3H), 1.08 (d,  $J$  = 7.2 Hz, 3H).  $^{13}\text{C}$  NMR (100 MHz,  $\text{CDCl}_3$ ):  $\delta$  175.3, 134.5, 128.8, 128.5, 128.4, 60.4, 52.4, 46.5, 36.6, 30.8, 17.1, 14.0. IR (neat,  $\text{cm}^{-1}$ ): 2124, 1728, 1377, 1188, 1166, 1026, 735, 699.

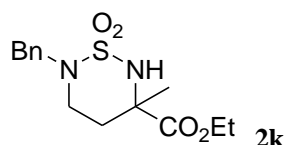

Yield: 99%. Purified by chromatography on silica gel (the gradient elution: 4:1-2:1 Hexane/ EtOAc), colorless liquid, TLC  $R_f$  = 0.22 (4:1 Hexane/EtOAc).  $^1\text{H}$  NMR (400 MHz,  $\text{CDCl}_3$ ): 7.34-7.28 (m, 5H), 4.94 (s, 1H), 4.44, 4.04 (AB q,  $J$  = 14.0 Hz, each 1H), 4.24 (q,  $J$  = 7.2 Hz, 2H), 3.51-3.43 (m, 1H), 3.25-3.18 (m, 1H), 2.06-1.99 (m, 1H), 1.73-1.65 (m, 1H), 1.54 (s, 3H), 1.29 (t,  $J$  = 7.2 Hz, 3H).  $^{13}\text{C}$  NMR (100 MHz,

CDCl<sub>3</sub>):  $\delta$  172.8, 135.3, 128.7, 128.6, 128.0, 62.2, 61.9, 51.6, 44.7, 28.5, 25.3, 14.0. IR (neat, cm<sup>-1</sup>): 1732, 1348, 1331, 1165, 1109, 1020, 857, 768, 723, 670. HRMS (ESI) ([M+H]<sup>+</sup>) Calcd. for C<sub>14</sub>H<sub>21</sub>N<sub>2</sub>O<sub>4</sub>S<sub>3</sub> 313.1217, Found 313.1217.

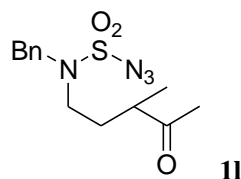

Prepared according to METHOD B (yield 60%). Purified by chromatography on silica gel (the gradient elution: 10:1-4:1 Hexane/ EtOAc), colorless liquid, TLC R<sub>f</sub> = 0.31 (4:1 Hexane/EtOAc). <sup>1</sup>H NMR (400 MHz, CDCl<sub>3</sub>):  $\delta$  7.37-7.31 (m, 5H), 4.44, 4.39 (AB q, *J* = 15.2 Hz, each 1H), 3.26-3.09 (m, 2H), 2.50-2.42 (m, 1H), 2.05 (s, 3H), 1.97-1.87 (m, 1H), 1.48-1.39 (m, 1H), 1.01 (d, *J* = 7.2 Hz, 3H). <sup>13</sup>C NMR (100 MHz, CDCl<sub>3</sub>):  $\delta$  211.0, 134.6, 128.9, 128.7, 128.5, 52.8, 46.8, 43.8, 29.7, 28.1, 16.6. IR (neat, cm<sup>-1</sup>): 2125, 1171, 1376, 1205, 1165, 1033, 735, 699.

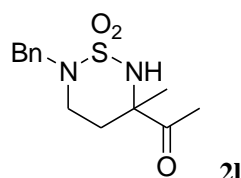

Yield: 91%. Purified by chromatography on silica gel (the gradient elution: 2:1-1:1 Hexane/ EtOAc), white solid, TLC R<sub>f</sub> = 0.45 (1:1 Hexane/EtOAc). <sup>1</sup>H NMR (400 MHz, CDCl<sub>3</sub>):  $\delta$  7.36-7.28 (m, 5H), 4.72 (s, 1H), 4.34, 3.99 (AB q, *J* = 14.0 Hz, each 1H), 3.28-3.20 (m, 1H), 3.09 (dq, *J* = 13.6, 4.8 Hz, 1H), 2.34 (s, 3H), 2.25-2.18 (m, 1H), 1.51-1.42 (m, 1H), 1.38 (s, 3H). <sup>13</sup>C NMR (100 MHz, CDCl<sub>3</sub>):  $\delta$  207.0, 135.1, 128.8, 128.7, 128.1, 66.7, 51.6, 45.3, 29.2, 25.3, 23.8. IR (neat, cm<sup>-1</sup>): 1720, 1332, 1157, 1136, 1104, 932, 861, 776, 725, 697. HRMS (ESI) ([M+H]<sup>+</sup>) Calcd. for C<sub>13</sub>H<sub>19</sub>N<sub>2</sub>O<sub>3</sub>S 283.1111, Found 283.1116.

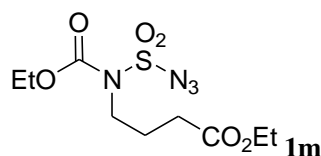

Prepared according to METHOD C (yield 89%). Purified by chromatography on silica gel (the gradient elution: 10:1-4:1 Hexane/ EtOAc), colorless liquid, TLC R<sub>f</sub> = 0.32 (10:1 Hexane/EtOAc). <sup>1</sup>H NMR (400 MHz, CDCl<sub>3</sub>):  $\delta$  4.33 (q, *J* = 7.2 Hz, 2H), 4.09 (q, *J* = 7.2 Hz, 2H), 3.81 (t, *J* = 7.2 Hz, 2H), 2.31 (t, *J* = 7.2 Hz, 2H), 1.99-1.88 (m, 2H), 1.34 (t, *J* = 7.2 Hz, 3H), 1.21 (t, *J* = 7.2 Hz, 3H). <sup>13</sup>C NMR (100 MHz, CDCl<sub>3</sub>):  $\delta$  172.2, 152.1, 64.6, 60.5, 48.5, 30.8, 24.3, 14.1. IR (neat, cm<sup>-1</sup>): 2153, 1734, 1398, 1262, 1168, 1097, 1027, 766.

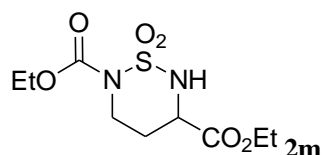

Yield: 65%. Purified by chromatography on silica gel (4:1 Hexane/ EtOAc), white solid, TLC  $R_f = 0.23$  (4:1 Hexane/EtOAc).  $^1\text{H NMR}$  (400 MHz,  $\text{CDCl}_3$ ):  $\delta$  5.11 (d,  $J = 9.6$  Hz, 1H), 4.41-4.20 (m, 6H), 3.80 (ddd,  $J = 2.8, 10.8, 13.6$  Hz, 1H), 2.30-2.22 (m, 1H), 1.93-1.82 (m, 1H), 1.33 (t,  $J = 7.2$  Hz, 3H), 1.28 (t,  $J = 7.2$  Hz, 3H).  $^{13}\text{C NMR}$  (100 MHz,  $\text{CDCl}_3$ ):  $\delta$  169.3, 152.6, 64.0, 62.6, 56.3, 45.7, 28.2, 14.2, 14.0. IR (neat,  $\text{cm}^{-1}$ ): 1724, 1376, 1311, 1281, 1199, 1171, 1125, 1020, 758. HRMS (ESI) ( $[\text{M}+\text{H}]^+$ ) Calcd. for  $\text{C}_9\text{H}_{17}\text{N}_2\text{O}_6\text{S}$  281.0802, Found 281.0795.

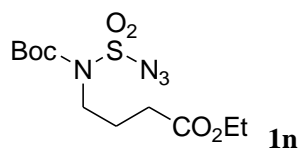

Prepared according to METHOD C (yield 91%). Purified by chromatography on silica gel (the gradient elution: 10:1-4:1 Hexane/ EtOAc), colorless liquid, TLC  $R_f = 0.41$  (4:1 Hexane/EtOAc).  $^1\text{H NMR}$  (400 MHz,  $\text{CDCl}_3$ ):  $\delta$  4.10 (q,  $J = 7.2$  Hz, 2H), 3.76 (t,  $J = 7.2$  Hz, 2H), 2.31 (t,  $J = 7.2$  Hz, 2H), 1.97-1.89 (m, 2H), 1.53 (s, 9H), 1.22 (t,  $J = 7.2$  Hz, 3H).  $^{13}\text{C NMR}$  (100 MHz,  $\text{CDCl}_3$ ):  $\delta$  172.3, 150.6, 86.1, 60.5, 48.4, 30.9, 27.9, 24.4, 14.1. IR (neat,  $\text{cm}^{-1}$ ): 2149, 1730, 1671, 1395, 1372, 1262, 1176, 1142, 1098, 714.

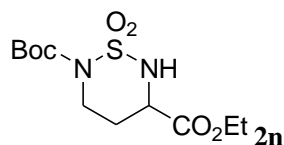

Yield: 72%. Purified by chromatography on silica gel (2:1 Hexane/ EtOAc), white solid, TLC  $R_f = 0.57$  (1:1 Hexane/EtOAc).  $^1\text{H NMR}$  (400 MHz,  $\text{CDCl}_3$ ):  $\delta$  4.99 (d,  $J = 9.2$  Hz, 1H), 4.38-4.11 (m, 4H), 3.78-3.70 (m, 1H), 2.31-2.22 (m, 1H), 1.91-1.80 (m, 1H), 1.51 (s, 9H), 1.29 (t,  $J = 6.8$  Hz, 3H).  $^{13}\text{C NMR}$  (100 MHz,  $\text{CDCl}_3$ ):  $\delta$  169.4, 151.1, 84.6, 62.6, 56.2, 45.2, 28.4, 28.0, 14.1. IR (neat,  $\text{cm}^{-1}$ ): 2924, 1723, 1465, 1362, 1317, 1290, 1259, 1178, 1147, 1124, 1032, 1021, 802. HRMS (ESI) ( $[\text{M}+\text{Na}]^+$ ) Calcd. for  $\text{C}_{11}\text{H}_{20}\text{N}_2\text{O}_6\text{SNa}$  331.0934, Found 331.0928.

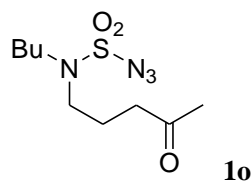

Prepared according to METHOD B (yield 53%). Purified by chromatography on silica gel (the gradient elution: 10:1-4:1 Hexane/ EtOAc), colorless liquid, TLC  $R_f = 0.32$  (4:1 Hexane/EtOAc).  $^1\text{H NMR}$  (400 MHz,  $\text{CDCl}_3$ ):  $\delta$  3.20 (t,  $J = 7.6$  Hz, 4H), 2.47 (t,



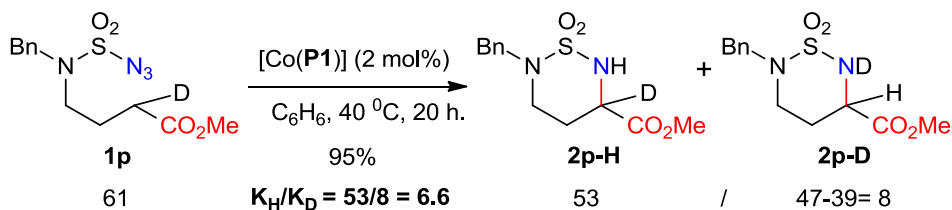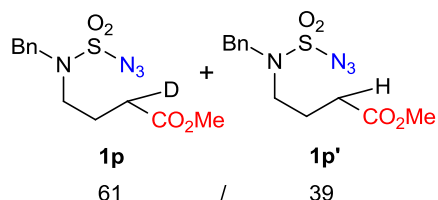

Prepared according to METHOD A (yield 96%). Purified by chromatography on silica gel (the gradient elution: 10:1-4:1 Hexane/ EtOAc), colorless liquid, TLC  $R_f = 0.43$  (4:1 Hexane/EtOAc).  $^1\text{H}$  NMR (400 MHz,  $\text{CDCl}_3$ )  $\delta$  7.35 (brs, 5H), 4.43 (s, 2H), 3.62 (s, 3H), 3.25 (t,  $J = 7.2$  Hz, 2H), 2.27-2.21 (m, 1.39H), 1.88-1.80 (m, 2H).  $^{13}\text{C}$  NMR (100 MHz,  $\text{CDCl}_3$ ):  $\delta$  172.8, 134.5, 128.9, 128.6, 128.5, 52.7, 51.6, 47.8, 30.5, 30.4, 30.2, 30.0, 22.5, 22.4. IR (neat,  $\text{cm}^{-1}$ ): 2126, 1735, 1378, 1202, 1164, 1101, 736, 698. HRMS (ESI) ( $[\text{M}+\text{Na}]^+$ ) Calcd. for  $\text{C}_{12}\text{H}_{15}\text{DN}_4\text{O}_4\text{SNa}$  336.0847, Found 336.0857; for  $\text{C}_{12}\text{H}_{16}\text{N}_4\text{O}_4\text{SNa}$  335.0785, Found 335.0798.

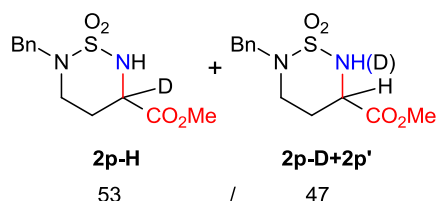

Yield: 95%. Purified by chromatography on silica gel (4:1 Hexane/ EtOAc), white solid, TLC  $R_f = 0.18$  (4:1 Hexane/EtOAc).  $^1\text{H}$  NMR (400 MHz,  $\text{CDCl}_3$ )  $\delta$  7.42-7.24 (m, 5H), 4.75-4.71 (m, 1H), 4.51-4.34 (m, 1.47H), 4.01 (dd,  $J = 10.0, 2.0$  Hz, 1H), 3.78 (s, 3H), 3.48-3.32 (m, 1H), 3.18-3.12 (m, 1H), 2.00-1.70 (m, 2H).  $^{13}\text{C}$  NMR (100 MHz,  $\text{CDCl}_3$ ):  $\delta$  167.0, 135.0, 128.7, 128.1, 57.3, 53.0, 51.7, 47.0, 25.8, 25.7. IR (neat,  $\text{cm}^{-1}$ ): 1735, 1341, 1284, 1256, 1152, 1131, 1109, 1006, 848, 764, 738, 697. HRMS (ESI) ( $[\text{M}+\text{Na}]^+$ ) Calcd. for  $\text{C}_{12}\text{H}_{15}\text{DN}_2\text{O}_4\text{SNa}$  308.0786, Found 308.0805; for  $\text{C}_{12}\text{H}_{16}\text{N}_2\text{O}_4\text{S}$  307.0723, Found 307.0744.

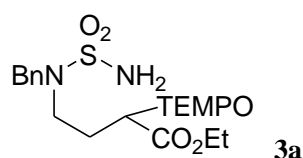

Purified by chromatography on silica gel (20:1 DCM/ EtOAc), white solid, TLC  $R_f = 0.27$  (10:1 DCM/EtOAc).  $^1\text{H}$  NMR (500 MHz,  $\text{CDCl}_3$ ):  $\delta$  7.36-7.25 (m, 5H), 4.55 (s, 2H), 4.41, 4.31 (AB q,  $J = 15.0$  Hz, each 1H), 4.25 (dd,  $J = 3.5, 8.5$  Hz, 1H), 4.16-4.07 (m, 2H), 3.30-3.23 (m, 1H), 3.20-3.13 (m, 1H), 2.19-2.11 (m, 1H), 2.09-2.02 (m, 1H), 1.63-1.46 (m, 2H), 1.40 (brs, 4H), 1.23 (t,  $J = 7.0$  Hz, 3H),

1.08-0.98 (m, 12H).  $^{13}\text{C}$  NMR (125 MHz,  $\text{CDCl}_3$ ):  $\delta$  173.0, 135.7, 128.7, 128.6, 128.0, 83.2, 60.9, 60.1, 59.8, 51.4, 42.8, 40.3, 40.2, 33.8, 32.9, 29.9, 20.2, 20.1, 17.0, 14.1. IR (neat,  $\text{cm}^{-1}$ ): 1718, 1459, 1354, 1196, 1141, 1046, 1008, 890, 774, 732, 697. HRMS (ESI) ( $[\text{M}+\text{Na}]^+$ ) Calcd. for  $\text{C}_{22}\text{H}_{37}\text{N}_3\text{O}_5\text{SNa}$  478.2346, Found 478.2354.

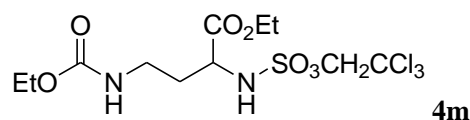

To a solution of cyclic sulfamide **2m** (0.2 mmol, 1.0 equiv) in 2.0 mL of 1,4-dioxane and 0.5 mL of 2,2,2-trichloroethanol was added DMAP (0.3 mmol, 1.5 equiv). The mixture was stirred at 80 °C for 3 h. The reaction was then cooled to 23 °C and the solution concentrated under reduced pressure to an oily residue. Purified by chromatography on silica gel (the gradient elution: 2:1-1:1 Hexane/ EtOAc), Yield 88%. colorless liquid, TLC  $R_f$  = 0.62 (1:1 Hexane/EtOAc).  $^1\text{H}$  NMR (400 MHz,  $\text{CDCl}_3$ ):  $\delta$  6.23 (d,  $J$  = 8.4 Hz, 1H), 4.95 (t,  $J$  = 6.0 Hz, 1H), 4.64 (s, 2H), 4.25-4.17 (m, 3H), 4.12-4.06 (m, 2H), 3.53-3.45 (m, 1H), 3.26-3.17 (m, 1H), 2.6-2.08 (m, 1H), 1.94-1.85 (m, 1H), 1.27 (t,  $J$  = 7.2 Hz, 3H), 1.22 (t,  $J$  = 7.2 Hz, 3H).  $^{13}\text{C}$  NMR (100 MHz,  $\text{CDCl}_3$ ):  $\delta$  171.4, 156.9, 93.2, 78.1, 62.4, 61.1, 54.1, 36.5, 32.6, 14.5, 14.0. IR (neat,  $\text{cm}^{-1}$ ): 1693, 1525, 1372, 1261, 1183, 1090, 1016, 854, 757, 722. HRMS (ESI) ( $[\text{M}+\text{H}]^+$ ) Calcd. for  $\text{C}_{11}\text{H}_{20}\text{Cl}_3\text{N}_2\text{O}_7\text{S}$  429.0051, Found 429.0044.



## X-ray Crystallography

The X-ray diffraction data were collected using Bruker-AXS SMART-APEXII CCD diffractometer (CuK $\alpha$ ,  $\lambda = 1.54178 \text{ \AA}$ ). Indexing was performed using APEX2 [1] (Difference Vectors method). Data integration and reduction were performed using SaintPlus 6.01 [2]. Absorption correction was performed by multi-scan method implemented in SADABS [3]. Space groups were determined using XPREP implemented in APEX2 [1]. Structures were solved using SHELXS-97 (direct methods) and refined using SHELXL-97 (full-matrix least-squares on  $F^2$ ) contained in APEX2 [1] and WinGX v1.70.01 [4,5,6,7] programs packages. All non-hydrogen atoms were refined anisotropically. **2i**: The H1N atom was found in the Fourier difference map and refined using distance restraint with  $U_{iso}(H) = 1.2U_{eq}(-NH)$ . **2f**: The H1N atom was found in the Fourier difference map and freely refined. **2j**: The H1N atom was found in the Fourier difference map and freely refined. **2p**: Atom H2N has been found on the difference Fourier map and freely refined. The rest of hydrogen atoms were placed in geometrically calculated positions and were included in the refinement process using riding model with isotropic thermal parameters:  $U_{iso}(H) = 1.5U_{eq}(-CH_3)$ ,  $U_{iso}(H) = 1.2U_{eq}(-CH, -CH_2)$ . Crystal data and refinement conditions are shown in Tables 1 - 4.

[1] Bruker (2010). APEX2). Bruker AXS Inc., Madison, Wisconsin, USA.

[2] Bruker (2009). SAINT. Data Reduction Software. Bruker AXS Inc., Madison, Wisconsin, USA.

[3] Sheldrick, G. M. (2008). SADABS. Program for Empirical Absorption Correction. University of Gottingen, Germany.

[4] Farrugia L.J. Appl. Cryst. (1999). 32, 837-838

[5] Sheldrick, G.M. (1997) SHELXL-97. Program for the Refinement of Crystal

[6] Sheldrick, G.M. (1990) Acta Cryst. A46, 467-473

[7] Sheldrick, G. M. (2008). Acta Cryst. A64, 112-122.

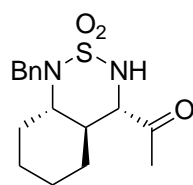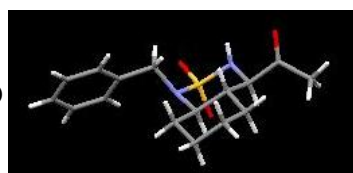

**2i(major)**

| Table 1. Crystal data and structure refinement for compound <b>2i</b> |                                                                                                                         |
|-----------------------------------------------------------------------|-------------------------------------------------------------------------------------------------------------------------|
| Identification code                                                   | <b>2i</b>                                                                                                               |
| Empirical formula                                                     | C <sub>16</sub> H <sub>22</sub> N <sub>2</sub> O <sub>3</sub> S                                                         |
| Formula weight                                                        | 322.42                                                                                                                  |
| Temperature                                                           | 100(2) K                                                                                                                |
| Wavelength                                                            | 1.54178 Å                                                                                                               |
| Crystal system, space group                                           | Monoclinic, P2 <sub>1</sub> /n                                                                                          |
| Unit cell dimensions                                                  | a = 5.0990(2) Å    alpha = 90 deg.<br>b = 15.0874(7) Å    beta = 96.234(3) deg.<br>c = 20.8353(10) Å    gamma = 90 deg. |
| Volume                                                                | 1593.39(12) Å <sup>3</sup>                                                                                              |
| Z, Calculated density                                                 | 4, 1.344 Mg/m <sup>3</sup>                                                                                              |
| Absorption coefficient                                                | 1.928 mm <sup>-1</sup>                                                                                                  |
| F(000)                                                                | 688                                                                                                                     |
| Crystal size                                                          | 0.20 x 0.18 x 0.15 mm                                                                                                   |
| Theta range for data collection                                       | 3.62 to 65.79 deg.                                                                                                      |
| Limiting indices                                                      | -4 ≤ h ≤ 5, -17 ≤ k ≤ 17, -24 ≤ l ≤ 24                                                                                  |
| Reflections collected / unique                                        | 13569 / 2685 [R(int) = 0.0922]                                                                                          |
| Completeness to theta = 65.79                                         | 97.8 %                                                                                                                  |
| Absorption correction                                                 | Semi-empirical from equivalents                                                                                         |
| Max. and min. transmission                                            | 0.7608 and 0.6991                                                                                                       |
| Refinement method                                                     | Full-matrix least-squares on F <sup>2</sup>                                                                             |
| Data / restraints / parameters                                        | 2685 / 1 / 204                                                                                                          |
| Goodness-of-fit on F <sup>2</sup>                                     | 1.008                                                                                                                   |
| Final R indices [I > 2σ(I)]                                           | R1 = 0.0461, wR2 = 0.1119                                                                                               |
| R indices (all data)                                                  | R1 = 0.0664, wR2 = 0.1239                                                                                               |
| Largest diff. peak and hole                                           | 0.257 and -0.455 e.Å <sup>-3</sup>                                                                                      |

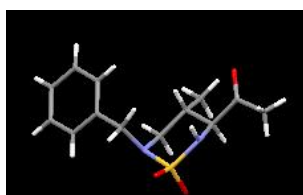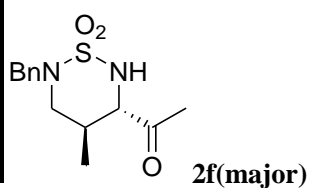

| Table 2. Crystal data and structure refinement for compound <b>2f</b> |                                                                                                                            |
|-----------------------------------------------------------------------|----------------------------------------------------------------------------------------------------------------------------|
| Identification code                                                   | <b>2f</b>                                                                                                                  |
| Empirical formula                                                     | C <sub>13</sub> H <sub>18</sub> N <sub>2</sub> O <sub>3</sub> S                                                            |
| Formula weight                                                        | 282.35                                                                                                                     |
| Temperature                                                           | 100(2) K                                                                                                                   |
| Wavelength                                                            | 1.54178 Å                                                                                                                  |
| Crystal system, space group                                           | Monoclinic, P2 <sub>1</sub> /c                                                                                             |
| Unit cell dimensions                                                  | a = 10.1217(2) Å    alpha = 90 deg.<br>b = 5.26760(10) Å    beta = 98.6910(10) deg.<br>c = 25.2607(5) Å    gamma = 90 deg. |
| Volume                                                                | 1331.36(5) Å <sup>3</sup>                                                                                                  |
| Z, Calculated density                                                 | 4, 1.409 Mg/m <sup>3</sup>                                                                                                 |
| Absorption coefficient                                                | 2.226 mm <sup>-1</sup>                                                                                                     |
| F(000)                                                                | 600                                                                                                                        |
| Crystal size                                                          | 0.20 x 0.18 x 0.15 mm                                                                                                      |
| Theta range for data collection                                       | 3.54 to 66.59 deg.                                                                                                         |
| Limiting indices                                                      | -12 ≤ h ≤ 11, -6 ≤ k ≤ 5, -29 ≤ l ≤ 30                                                                                     |
| Reflections collected / unique                                        | 12939 / 2342 [R(int) = 0.0499]                                                                                             |
| Completeness to theta = 66.59                                         | 99.2 %                                                                                                                     |
| Absorption correction                                                 | Semi-empirical from equivalents                                                                                            |
| Max. and min. transmission                                            | 0.7313 and 0.6645                                                                                                          |
| Refinement method                                                     | Full-matrix least-squares on F <sup>2</sup>                                                                                |
| Data / restraints / parameters                                        | 2342 / 0 / 179                                                                                                             |
| Goodness-of-fit on F <sup>2</sup>                                     | 1.079                                                                                                                      |
| Final R indices [I > 2σ(I)]                                           | R1 = 0.0364, wR2 = 0.0941                                                                                                  |
| R indices (all data)                                                  | R1 = 0.0414, wR2 = 0.0969                                                                                                  |
| Extinction coefficient                                                | 0.0031(4)                                                                                                                  |
| Largest diff. peak and hole                                           | 0.389 and -0.379 e.Å <sup>-3</sup>                                                                                         |

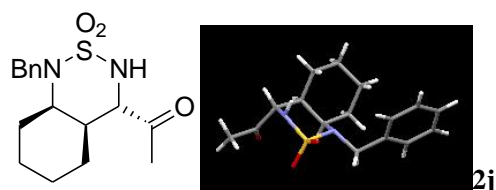

| Table 3. Crystal data and structure refinement for compound <b>2j</b> |                                                                                                                           |
|-----------------------------------------------------------------------|---------------------------------------------------------------------------------------------------------------------------|
| Identification code                                                   | <b>2j</b>                                                                                                                 |
| Empirical formula                                                     | C <sub>16</sub> H <sub>22</sub> N <sub>2</sub> O <sub>3</sub> S                                                           |
| Formula weight                                                        | 322.42                                                                                                                    |
| Temperature                                                           | 100(2) K                                                                                                                  |
| Wavelength                                                            | 1.54178 Å                                                                                                                 |
| Crystal system, space group                                           | Monoclinic, P2 <sub>1</sub> /c                                                                                            |
| Unit cell dimensions                                                  | a = 10.5533(2) Å    alpha = 90 deg.<br>b = 14.5967(2) Å    beta = 96.7800(10) deg.<br>c = 10.1764(2) Å    gamma = 90 deg. |
| Volume                                                                | 1556.64(5) Å <sup>3</sup>                                                                                                 |
| Z, Calculated density                                                 | 4, 1.376 Mg/m <sup>3</sup>                                                                                                |
| Absorption coefficient                                                | 1.974 mm <sup>-1</sup>                                                                                                    |
| F(000)                                                                | 688                                                                                                                       |
| Crystal size                                                          | 0.20 x 0.20 x 0.18 mm                                                                                                     |
| Theta range for data collection                                       | 4.22 to 66.56 deg.                                                                                                        |
| Limiting indices                                                      | -12 ≤ h ≤ 12, -17 ≤ k ≤ 17, -12 ≤ l ≤ 12                                                                                  |
| Reflections collected / unique                                        | 19566 / 2740 [R(int) = 0.0569]                                                                                            |
| Completeness to theta = 66.56                                         | 99.3 %                                                                                                                    |
| Absorption correction                                                 | Semi-empirical from equivalents                                                                                           |
| Max. and min. transmission                                            | 0.7177 and 0.6936                                                                                                         |
| Refinement method                                                     | Full-matrix least-squares on F <sup>2</sup>                                                                               |
| Data / restraints / parameters                                        | 2740 / 0 / 205                                                                                                            |
| Goodness-of-fit on F <sup>2</sup>                                     | 1.044                                                                                                                     |
| Final R indices [I > 2σ(I)]                                           | R1 = 0.0351, wR2 = 0.0904                                                                                                 |
| R indices (all data)                                                  | R1 = 0.0404, wR2 = 0.0941                                                                                                 |
| Extinction coefficient                                                | 0.0038(3)                                                                                                                 |
| Largest diff. peak and hole                                           | 0.354 and -0.453 e.Å <sup>-3</sup>                                                                                        |

# DSC of compound **1a**

Sample: RA73-12a  
Size: 6.1000 mg  
Method: RA73-12a (N-based)

DSC

File: C:\...Ananthojil\December\RA73-12a.001  
Operator: Anan  
Run Date: 30-Dec-09 10:12  
Instrument: 2920 MDSC V2.6A

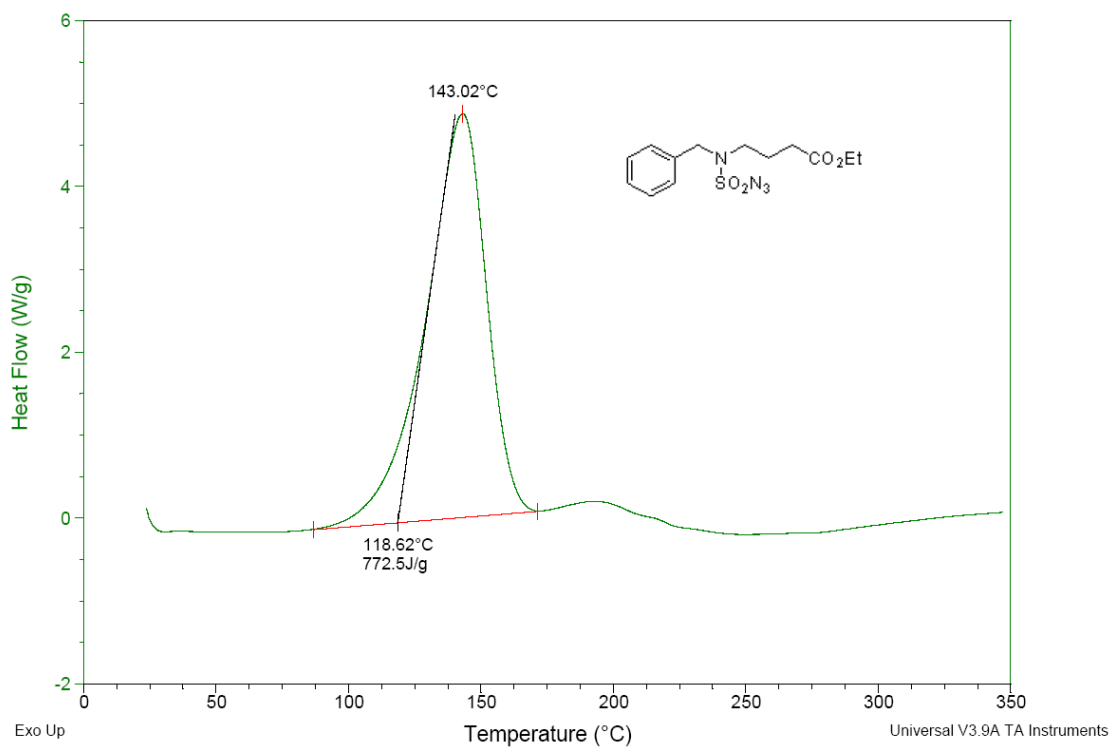

## References

- 1) (a) Lu, H.; Tao, J.; Jones, J. E.; Wojtas, L.; Zhang, X. P. *Org. Lett.* **2010**, *12*, 1248. (b) Xu, X.; Lu, H.; Ruppel, J. V.; Cui, X.; Lopez de Mesa, S.; Wojtas, L.; Zhang, X. P. *J. Am. Chem. Soc.* **2011**, *133*, 15292.
- 2) Nojima, M. *J. Chem. Soc., Perkin Trans. 1*, **1979**, 1811.
- 3) Lu, H.; Jiang, H.; Yang, H.; Wojtas, L.; Zhang, X. P. *Chem. Sci.* **2011**, *2*, 2361.
